# Supplementary material for: circRNAprofiler: an R-based computational framework for the downstream analysis of circular RNAs
Source: BMC Bioinformatics. 2020 Apr 29;21:164. doi: 10.1186/s12859-020-3500-3 (PMC7191743; doi:10.1186/s12859-020-3500-3)
Supplement: Supplementary file 3 — Additional file 3. RBP analysis. This file contains the results of the RBP analysis in the ALPK2 circRNA sequence and in the region flanking the BSJ of circALKP2. [file 12859_2020_3500_MOESM3_ESM.xlsx]

## Sheet: circRNA sequence
Table showing the target ALPK2 circRNA sequence.
See package vignettes for an explanation about the content of each column.
id	gene	transcript	strand	chrom	startGR	endGR	length	seq	type
ALPK2:-:chr18:56247780:56246046	ALPK2	ENST00000361673.3	-	chr18	56246046	56247780	1735	CUGUACCAAAAAUGAUGCUGCUGUCUAUCAAAUCUCGGCUAAAAACUCUUUUGGAAUGAUCUGUUGUUCUGCUUCCGUUGAGGUUGAGUGCUCAUCAGAGAACCCACAAUUGUCUCCUAACCUGGAAGAUGACAGGGACAGGGGUUGGAAACAUGAAACAGGGACACAUGAAGAAGAAAGGGCAAAUCAGAUUGAUGAGAAGGAACAUCCUUAUAAGGAAGAAGAAAGCAUCUCCCCGGGCACUCCCAGGUCAGCUGACUCCUCCCCCUCCAAAUCCAACCAUUCACUCUCCCUCCAGUCAUUGGGCAAUCUUGACAUUAGUGUGUCCAGUUCUGAAAAUCCUUUGGGUGUUAAAGGAACAAGGCACACUGGAGAGGCUUAUGAUCCAAGUAACACAGA…	circ

## Sheet: motifs in circRNA seq
Table showing the the log2FC and the counts of the RBP motifs found in the ALPK2 circRNA sequence (foreground) compared to the 1457 circRNAs (background).
See package vignettes for an explanation about the content of each column.
We normalized the number of RBP motifs by the total length of the target sequences
id	foreground	background	foregroundNorm	backgroundNorm	log2FC	motifF	motifB
DDX58	0	28	0.000576369	2.16229e-05	4.73636	GCGCGC	GCGCGC
ESRP1	2	250	0.00172911	0.00018715	3.20776	AGGGAU	AGGGAU
SUPV3L1	0	88	0.000576369	6.63598e-05	3.11861	CCGCCC	CCGCCC
RBM25	1	224	0.00115274	0.000167764	2.78056	CGGGCA	AUCGGG,CGGGCA,UCGGGC
RBM14	0	138	0.000576369	0.000103641	2.4754	CGCGCC,CGCGCG,CGCGGC,CGCGGG,GCGCGC,GCGCGG	CGCGCC,CGCGCG,CGCGGC,CGCGGG,GCGCGC,GCGCGG
NXF1	3	622	0.00230548	0.000464519	2.31126	AACCUG	AACCUG
OAS1	0	160	0.000576369	0.000120044	2.26343	GCAUAA	GCAUAA
CNOT4	3	706	0.00230548	0.00052715	2.12878	GACAGA	GACAGA
CPEB4	2	567	0.00172911	0.00042351	2.02956	UUUUUU	UUUUUU
DDX19B	2	567	0.00172911	0.00042351	2.02956	UUUUUU	UUUUUU
EIF4A3	2	567	0.00172911	0.00042351	2.02956	UUUUUU	UUUUUU
RBMY1A1	5	1203	0.00345821	0.000897722	1.94569	ACAAGA,CAAGAC	ACAAGA,CAAGAC
FXR1	3	935	0.00230548	0.000697897	1.72398	AUGACA,AUGACG	ACGACA,ACGACG,AUGACA,AUGACG
RBM8A	0	263	0.000576369	0.000196843	1.54995	ACGCGC,AUGCGC,CGCGCC,CGCGCG,CGCGCU,GCGCGC,GUGCGC,UGCGCC,UGCGCG,UGCGCU	ACGCGC,AUGCGC,CGCGCC,CGCGCG,CGCGCU,GCGCGC,GUGCGC,UGCGCC,UGCGCG,UGCGCU
PPRC1	0	275	0.000576369	0.00020579	1.48582	CCGCGC,CGCGCC,CGCGCG,CGGCGC,GCGCGC,GGCGCC,GGCGCG,GGGCGC	CCGCGC,CGCGCC,CGCGCG,CGGCGC,GCGCGC,GGCGCC,GGCGCG,GGGCGC
ACO1	8	2746	0.00518732	0.00204821	1.34063	CAGUGA,CAGUGC,CAGUGG,CAGUGU	CAGUGA,CAGUGC,CAGUGG,CAGUGU
FXR2	22	7321	0.0132565	0.0054594	1.27988	AGACAG,AGACGG,GACAAG,GACAGA,GACAGG,GACGAA,GACGGA,GGACAG,UGACAA,UGACAG,UGACGA,UGACGG	AGACAA,AGACAG,AGACGA,AGACGG,GACAAA,GACAAG,GACAGA,GACAGG,GACGAA,GACGAG,GACGGA,GACGGG,GGACAA,GGACAG,GGACGA,GGACGG,UGACAA,UGACAG,UGACGA,UGACGG
HNRNPM	7	2559	0.00461095	0.00190878	1.27242	AAGGAA,GAAGGA,GGGGGG	AAGGAA,GAAGGA,GGGGGG
U2AF2	3	1285	0.00230548	0.000958862	1.26567	UUUUUC,UUUUUU	UUUUCC,UUUUUC,UUUUUU
ZC3H10	2	988	0.00172911	0.000737414	1.22948	CAGCGA,GCAGCG	CAGCGA,CAGCGC,CCAGCG,CGAGCG,GAGCGA,GAGCGC,GCAGCG,GGAGCG
FUS	13	4681	0.00806916	0.00349097	1.20879	CGGUGA,GGGGGG,GGGUGA,GGGUGG,GGGUGU,UGGUGA,UUUUUU	AAAAAA,CGGUGA,CGGUGG,GGGGGG,GGGUGA,GGGUGC,GGGUGG,GGGUGU,UGGUGA,UGGUGG,UGGUGU,UUUUUU
PTBP2	0	353	0.000576369	0.000263948	1.12674	CUCUCU	CUCUCU
ANKHD1	1	711	0.00115274	0.000530879	1.11861	GACGAA	AGACGA,AGACGU,GACGAA,GACGAU,GACGUA,GACGUU
RBM6	5	2273	0.00345821	0.00169553	1.02829	AAUCCA,AUCCAA,AUCCAG,UAUCCA	AAUCCA,AUCCAA,AUCCAG,CAUCCA,UAUCCA
RALY	3	1521	0.00230548	0.00113483	1.02259	UUUUUC,UUUUUU	UUUUUC,UUUUUG,UUUUUU
RBM24	9	4045	0.00576369	0.00301676	0.933991	AGAGUG,AGUGUG,GAGUGA,GAGUGG,GUGUGA,GUGUGU,UGAGUG	AGAGUG,AGUGUG,GAGUGA,GAGUGG,GAGUGU,GUGUGA,GUGUGG,GUGUGU,UGAGUG,UGUGUG
SRSF11	6	2845	0.00403458	0.00212202	0.926979	AAGAAG	AAGAAG
HNRNPH3	25	10784	0.0149856	0.00804147	0.898045	AAGGGA,AAUGUG,AGGGAA,AGGGGA,AUUGGG,GAAGGG,GAAUGU,GAGGGG,GGAAUG,GGGAAU,GGGGAG,GGGGGG,GGGUGU,UGGGUG,UGUGGG,UUGGGU	AAGGGA,AAGGUG,AAUGUG,AGGGAA,AGGGGA,AUCGGG,AUGUGG,AUUGGG,CGAGGG,CGGGCG,CGGGGG,GAAGGG,GAAUGU,GAGGGG,GGAAGG,GGAAUG,GGAGGA,GGAGGG,GGGAAG,GGGAAU,GGGAGG,GGGCGU,GGGCUG,GGGGAG,GGGGCU,GGGGGC,GGGGGG,GGGUCG,GGGUGU,GGUCGA,GUCGAG,UCGAGG,UCGGGC,UGGGUG,UGUGGG,UUGGGU
HNRNPK	28	12116	0.0167147	0.00903463	0.88758	ACCCCA,ACCCUU,CAACCC,CAUCCC,CCAACC,CCCCAA,CCCCAC,CCCCCA,CCCCCU,GCCCAC,GCCCAG,GCCCCC,GGGGGG,UCCCAA,UCCCAU,UCCCCA,UCCCCC,UCCCGA,UUUUUU	AAAAAA,ACCCAA,ACCCAU,ACCCCA,ACCCCC,ACCCGA,ACCCGC,ACCCGU,ACCCUU,CAAACC,CAACCC,CAUACC,CAUCCC,CCAAAC,CCAACC,CCAUAC,CCAUCC,CCCCAA,CCCCAC,CCCCAU,CCCCCA,CCCCCC,CCCCCU,CCCCUA,CCCCUU,GCCCAA,GCCCAC,GCCCAG,GCCCCC,GCCCCU,GGGGGG,UCCCAA,UCCCAC,UCCCAU,UCCCCA,UCCCCC,UCCCCU,UCCCGA,UCCCUA,UCCCUU,UUUUUU
RC3H1	5	2510	0.00345821	0.00187224	0.88526	CCCUUC,CUUCUG,UCUGUG,UUCUGU	CCCUUC,CCUUCU,CUUCUG,UCCCUU,UCUGUG,UUCUGU
HNRNPH2	30	13126	0.0178674	0.0097877	0.868291	AAGGGA,AAUGUG,AGGGAA,AGGGGA,AUUGGG,CUGGGG,GAAGGG,GAAUGU,GAGGGG,GGAAUG,GGGAAU,GGGGAA,GGGGAG,GGGGGA,GGGGGG,GGGUGU,UGGGGG,UGGGGU,UGGGUG,UGUGGG,UUGGGU	AAGGCG,AAGGGA,AAGGGG,AAGGUG,AAUGUG,AGGCGA,AGGGAA,AGGGGA,AUCGGG,AUGUGG,AUUGGG,CAGGAC,CGAGGG,CGGGCG,CGGGGG,CUGGGG,GAAGGG,GAAUGU,GAGGGG,GGAAGG,GGAAUG,GGAGGA,GGAGGG,GGCGAA,GGGAAG,GGGAAU,GGGAGG,GGGCGU,GGGCUG,GGGGAA,GGGGAG,GGGGCU,GGGGGA,GGGGGC,GGGGGG,GGGUCG,GGGUGU,GGUCGA,GUCGAG,UCGAGG,UCGGGC,UGGGGG,UGGGGU,UGGGUG,UGUGGG,UUGGGU
IFIH1	0	424	0.000576369	0.000316887	0.863025	CCGCGG,CGCGGA,GCCGCG,GCGGAU,GGCCCU,GGCCGC,GGGCCG	CCGCGG,CGCGGA,GCCGCG,GCGGAU,GGCCCU,GGCCGC,GGGCCG
ZFP36L2	3	1711	0.00230548	0.00127649	0.852877	AUUUAU,UAUUUA,UUUAUU	AUUUAU,UAUUUA,UUAUUU,UUUAUU
G3BP2	7	3451	0.00461095	0.00257387	0.841127	AGGAUG,GGAUGA,GGAUGG,GGAUUA	AGGAUA,AGGAUG,AGGAUU,GGAUAA,GGAUAG,GGAUGA,GGAUGG,GGAUUA,GGAUUG
HNRNPLL	14	6482	0.00864553	0.00483383	0.838789	ACAAAC,ACACCA,ACCACA,ACUGCA,CAAACA,CACACA,CACACC,CACCAC,CACUGC,GCACAC	ACAAAC,ACACAC,ACACCA,ACAUAC,ACCACA,ACCGCA,ACGACA,ACUGCA,AGACGA,CAAACA,CACACA,CACACC,CACCAC,CACCGC,CACUGC,CAGACG,CAUACA,GACGAC,GCAAAC,GCACAC,GCAUAC
ZNF638	7	3534	0.00461095	0.00263575	0.806849	GGUUGG,GGUUGU,GUUGUU,UGUUCU,UGUUGG,UGUUGU	CGUUCG,CGUUCU,CGUUGG,CGUUGU,GGUUCG,GGUUCU,GGUUGG,GGUUGU,GUUCGU,GUUCUU,GUUGGU,GUUGUU,UGUUCG,UGUUCU,UGUUGG,UGUUGU
QKI	11	5540	0.00691643	0.00413146	0.743376	ACUAAC,ACUUAU,CACACU,CACUAA,CUAACC,UAACCU,UCAUAU,UCUAAU	AAUCAU,ACACAC,ACACUA,ACUAAC,ACUAAU,ACUCAU,ACUUAU,AUCAUA,AUCUAA,AUCUAC,AUUAAC,CACACU,CACUAA,CUAACA,CUAACC,CUAACG,CUAAUC,CUACUC,CUCAUA,UAACCU,UAAUCA,UACUCA,UCAUAU,UCUAAU,UCUACU
RBMS1	1	938	0.00115274	0.000700133	0.719363	GAUAUA	AUAUAC,AUAUAG,GAUAUA,UAUAUA
MBNL1	38	18314	0.0224784	0.013656	0.719008	ACGCUC,ACGCUG,AUGCCA,CCCGCU,CCGCUA,CCUGCU,CUGCCA,CUGCUC,CUGCUG,CUGCUU,GCUGCU,GCUUUU,GUCUCG,GUGCUA,GUGCUC,UCUGCU,UGCUGC,UGCUGU,UGCUUC,UGCUUU,UGUCUC,UUGCCA,UUGCCC,UUGCCU,UUGCUU	ACGCUA,ACGCUC,ACGCUG,ACGCUU,AUGCCA,AUGCCC,AUGCCG,AUGCUC,AUGCUU,CCCGCU,CCGCUA,CCGCUC,CCGCUG,CCGCUU,CCUGCU,CGCUGC,CGCUGU,CGCUUC,CGCUUG,CGCUUU,CUCGCU,CUGCCA,CUGCCC,CUGCCG,CUGCCU,CUGCGG,CUGCUA,CUGCUC,CUGCUG,CUGCUU,CUUGCU,CUUGUG,GCGCUC,GCGCUG,GCGCUU,GCUGCG,GCUGCU,GCUUGC,GCUUGU,GCUUUU,GGCUUU,GUCUCG,GUGCUA,GUGCUC,GUGCUG,GUGCUU,UCCGCU,UCGCUA,UCGCUC,UCGCUG,UCGCUU,UCUCGC,UCUGCU,UGCGGC,UGCUGC,UGCUGU,UGCUUC,…
KHDRBS2	5	2836	0.00345821	0.00211531	0.709156	AUAAAA,AUAAAC,GAUAAA,UUUUUU	AAUAAA,AUAAAA,AUAAAC,GAUAAA,UUUUUU
HNRNPA1L2	0	472	0.000576369	0.000352676	0.708648	AUAGGG,GUAGGG,UAGGGA,UAGGGU,UUAGGG	AUAGGG,GUAGGG,UAGGGA,UAGGGU,UUAGGG
PCBP2	39	19262	0.0230548	0.0143628	0.682727	AAACCA,AACCCU,AAUUCA,ACAUUA,ACCAAA,ACCCUA,AUUCAC,AUUCCA,CCAUUC,CCCCCA,CCCCCU,CCCUAA,CCCUCC,CCCUUC,CCUCCA,CCUCCC,CCUCCU,CUAACC,CUCCCA,CUCCCC,CUCCCU,GGGGGG,UAACCC,UCCCCA,UUUUUU	AAACCA,AAAUUA,AAAUUC,AACCAA,AACCCU,AAUUAA,AAUUAC,AAUUCA,AAUUCC,ACAUUA,ACCAAA,ACCCUA,ACCUUA,AUUAAA,AUUACC,AUUCAC,AUUCCA,AUUCCC,CAAUUA,CAUUAA,CCAUUA,CCAUUC,CCCCCA,CCCCCC,CCCCCU,CCCUAA,CCCUCC,CCCUUA,CCCUUC,CCUCCA,CCUCCC,CCUCCU,CCUUAA,CCUUCC,CUAACC,CUCCCA,CUCCCC,CUCCCU,CUUAAA,CUUCCA,CUUCCC,CUUCCU,GGGGGG,UAACCC,UCCCCA,UUAGAG,UUAGGA,UUAGGG,UUUUUU
RBFOX1	3	1927	0.00230548	0.00143755	0.681455	AGCAUG,GCAUGC,GCAUGU	AGCAUG,GCAUGA,GCAUGC,GCAUGU,UGACUG,UGCAUG
RBMX	27	13984	0.0161383	0.0104274	0.630106	AAGAAG,AAGGAA,AAGUAA,ACCAAA,AGAAGG,AGGAAG,AGUAAC,AGUGUU,AUCAAA,AUCCCA,AUCCCC,GAAGGA,GUAACA	AAGAAG,AAGGAA,AAGUAA,AAGUGU,ACCAAA,AGAAGG,AGGAAG,AGUAAC,AGUGUU,AUCAAA,AUCCCA,AUCCCC,GAAGGA,GGAAGG,GUAACA,UAACAA,UAAGAC,UCAAAA
CELF4	4	2502	0.00288184	0.00186628	0.626829	GGUGUG,GGUGUU,GUGUGU,GUGUUG	GGUGUG,GGUGUU,GUGUGG,GUGUGU,GUGUUG,GUGUUU,UGUGUG,UGUGUU
HNRNPH1	32	16552	0.0190202	0.0123422	0.623933	AAGGGA,AAUGUG,AGGAAG,AGGGAA,AGGGGA,AUUGGG,CUGGGG,GAAGGG,GAAGGU,GAAUGU,GAGGAA,GAGGGG,GGAAUG,GGGAAU,GGGGAA,GGGGAG,GGGGGG,GGGUGU,UGGGGG,UGGGGU,UGGGUG,UGUGGG,UUGGGU	AAGGCG,AAGGGA,AAGGGG,AAGGUG,AAUGUG,AGGAAG,AGGCGA,AGGGAA,AGGGGA,AUCGGG,AUGUGG,AUUGGG,CAGGAC,CGAGGG,CGGGCG,CGGGGG,CUGGGG,GAAGGG,GAAGGU,GAAUGU,GAGGAA,GAGGGG,GGAAGG,GGAAUG,GGAGGA,GGAGGG,GGCGAA,GGGAAG,GGGAAU,GGGAGG,GGGCGU,GGGCUG,GGGGAA,GGGGAG,GGGGCU,GGGGGC,GGGGGG,GGGUCG,GGGUGU,GGUCGA,GUCGAG,UCGAGG,UCGGGC,UGGGGG,UGGGGU,UGGGUG,UGUGGG,UUGGGU
IGF2BP3	25	13054	0.0149856	0.00973402	0.622469	AAAAAC,AAAACA,AAAAUC,AAACUC,AAAUAC,AAAUCA,AACACA,AACUCA,AAUACA,AAUUCA,ACAAAC,ACAAUC,CAAACA,CACACA,CACUCA,CAUUCA	AAAAAC,AAAACA,AAAAUC,AAACAC,AAACUC,AAAUAC,AAAUCA,AAAUUC,AACACA,AACUCA,AAUACA,AAUUCA,ACAAAC,ACAAUC,ACACAC,ACACUC,ACAUAC,ACAUUC,CAAACA,CAAUCA,CACACA,CACUCA,CAUACA,CAUUCA
PABPC3	6	3540	0.00403458	0.00264023	0.611758	AAAAAC,AAAACA,AAAACC,GAAAAC	AAAAAC,AAAACA,AAAACC,GAAAAC
AKAP1	0	517	0.000576369	0.000386229	0.577536	AUAUAU,UAUAUA	AUAUAU,UAUAUA
NONO	7	4162	0.00461095	0.003104	0.570936	AGAGGA,AGGAAC,GAGAGG,GAGGAA	AGAGGA,AGGAAC,GAGAGG,GAGGAA
CPEB2	4	2611	0.00288184	0.00194755	0.565333	CAUUUU,CUUUUU,UUUUUU	AUUUUU,CAUUUU,CCUUUU,CUUUUU,UUUUUU
HNRNPA0	1	1049	0.00115274	0.000782897	0.55817	AGAUAU	AAUUUA,AGAUAU,AGUAGG
IGF2BP2	40	21610	0.0236311	0.0161135	0.552418	AAAAAC,AAAACA,AAAAUC,AAACUC,AAAUAC,AAAUCA,AACACA,AACUCA,AAUACA,AAUUCA,ACAAAC,ACAAUC,CAAACA,CAAAUC,CAACAC,CACACA,CACUCA,CAUUCA,CCAUUC,GAAAAC,GAAAUC,GAAUUC,GCAAUC,GCACAC,GCACUC,GCAUUC	AAAAAC,AAAACA,AAAAUC,AAACAC,AAACUC,AAAUAC,AAAUCA,AAAUUC,AACACA,AACUCA,AAUACA,AAUUCA,ACAAAC,ACAAUC,ACACAC,ACACUC,ACAUAC,ACAUUC,CAAAAC,CAAACA,CAAAUC,CAACAC,CAACUC,CAAUAC,CAAUCA,CAAUUC,CACACA,CACUCA,CAUACA,CAUUCA,CCAAAC,CCAAUC,CCACAC,CCACUC,CCAUAC,CCAUUC,GAAAAC,GAAAUC,GAACAC,GAACUC,GAAUAC,GAAUUC,GCAAAC,GCAAUC,GCACAC,GCACUC,GCAUAC,GCAUUC
ESRP2	6	3736	0.00403458	0.00278637	0.534034	GGGAAA,GGGAAU,GGGGAA,GGGGAG,UGGGGA	GGGAAA,GGGAAG,GGGAAU,GGGGAA,GGGGAG,GGGGAU,UGGGAA,UGGGGA
HNRNPCL1	3	2142	0.00230548	0.00159786	0.528928	CUUUUU,UUUUUU	AUUUUU,CUUUUU,UUUUUG,UUUUUU
SNRPB2	3	2156	0.00230548	0.00160829	0.519534	AUUGCA,UGCAGU	AUUGCA,GUAUUG,UAUUGC,UGCAGU,UUGCAG
SNRNP70	6	3778	0.00403458	0.00281768	0.51791	AUUCAA,GUUCAA,UUCAAG	AAUCAA,AUCAAG,AUUCAA,GAUCAA,GUUCAA,UUCAAG
CELF1	6	3856	0.00403458	0.00287584	0.488435	CUGUCU,GUGUGU,GUGUUG,GUUGUG,UGUCUG,UGUUGU	CUGUCU,GUGUGU,GUGUUG,GUUGUG,GUUUGU,UGUCUG,UGUGUG,UGUGUU,UGUUGU,UGUUUG,UUGUGU
AGO1	1	1109	0.00115274	0.000827634	0.478	UGAGGU	AGGUAG,GAGGUA,GGUAGU,GUAGUA,UGAGGU
CELF6	7	4487	0.00461095	0.00334632	0.462487	GUGAGG,GUGGGG,GUGUUG,UGUGAG,UGUGGG,UGUGGU	GUGAGG,GUGAUG,GUGGGG,GUGGUG,GUGUGG,GUGUUG,UGUGAG,UGUGAU,UGUGGG,UGUGGU,UGUGUG,UGUGUU
ELAVL3	5	3367	0.00345821	0.00251123	0.46163	AUUUAU,UAUUUA,UUUAUU,UUUUUU	AUUUAU,AUUUUA,UAUUUA,UAUUUU,UUAUUU,UUUAUU,UUUUUU
EIF4B	4	2815	0.00288184	0.00209965	0.45684	GUCGGA,GUUGGA,UUGGAA	CUCGGA,CUUGGA,GUCGGA,GUUGGA,UCGGAA,UCGGAC,UUGGAA,UUGGAC
MATR3	2	1701	0.00172911	0.00126904	0.446291	AAUCUU,AUCUUG	AAUCUU,AUCUUA,AUCUUG,CAUCUU
HNRNPU	3	2269	0.00230548	0.00169255	0.445867	GGGGGG,UUUUUU	AAAAAA,CCCCCC,GGGGGG,UUUUUU
TARDBP	9	5698	0.00576369	0.00424927	0.439779	GAAUGA,GAAUGG,GAAUGU,GUGUGU,GUUGUG,GUUGUU,UUGUUC	GAAUGA,GAAUGG,GAAUGU,GUGAAU,GUGUGU,GUUGUG,GUUGUU,GUUUUG,UGAAUG,UGUGUG,UUGUGC,UUGUUC,UUUUGC
RBM46	23	13813	0.0138329	0.0102999	0.425463	AAUGAA,AAUGAU,AUCAAA,AUGAAA,AUGAAG,AUGAAU,AUGAUG,AUGAUU,GAUGAA,GAUGAU	AAUCAA,AAUCAU,AAUGAA,AAUGAU,AUCAAA,AUCAAG,AUCAAU,AUCAUA,AUCAUG,AUCAUU,AUGAAA,AUGAAG,AUGAAU,AUGAUA,AUGAUG,AUGAUU,GAUCAA,GAUCAU,GAUGAA,GAUGAU
FMR1	57	33551	0.0334294	0.0250169	0.418214	AAGGAA,AAGGAG,AAGGGA,ACUGGU,AGCAGC,AGCGAC,AGGAAG,AGGAAU,AGGAGU,AGGAUG,AGGCAC,AGGGAG,AUGGAG,CAGCUG,CGACUG,CUAUGG,CUGAGG,CUGGGC,CUGGUG,GAAGGA,GAAGGG,GACAAG,GACAGG,GACUGG,GCAGCU,GCGACU,GCUGAG,GCUGGG,GGACAG,GGCUAA,GGGGGG,UAAGGA,UAUGGA,UGACAA,UGACAG,UGAGGA,UGGAGU,UUUUUU	AAAAAA,AAGCGG,AAGGAA,AAGGAG,AAGGAU,AAGGGA,ACUAAG,ACUGGG,ACUGGU,AGCAGC,AGCGAA,AGCGAC,AGCGGC,AGCUGG,AGGAAG,AGGAAU,AGGAGG,AGGAGU,AGGAUG,AGGAUU,AGGCAC,AGGGAG,AGUGGC,AUAGGC,AUGGAG,CAGCUG,CAUAGG,CGAAGG,CGACUG,CGGCUG,CUAAGG,CUAUGG,CUGAGG,CUGGGC,CUGGUG,GAAGGA,GAAGGG,GACAAG,GACAGG,GACUAA,GACUGG,GAGCGA,GAGCGG,GAGGAU,GCAGCU,GCAUAG,GCGAAG,GCGACU,GCGGCU,GCUAAG,GCUAUG,GCUGAG,GCUGGG,GGACAA,GGACAG,GGACUA,GGCAUA,…
G3BP1	24	14512	0.0144092	0.0108211	0.413142	ACCCAC,AGGCAC,AGGCAG,CAGGCA,CCACAG,CCAGGC,CCCACA,CCCAGG,CCCCAC,CCCCCA,CCCCGG,CCCCUC,CCCUCC,CGGCAG,CUCGGC	ACACGC,ACAGGC,ACCCAC,ACCCAU,ACCCCC,ACCCCU,ACCCGC,ACCGGC,ACGCAC,ACGCAG,ACGCCC,ACGCCG,AGGCAC,AGGCAG,AGGCCC,AGGCCG,AUACGC,AUAGGC,AUCCGC,AUCGGC,CACACG,CACAGG,CACCCG,CACCGG,CACGCA,CACGCC,CAGGCA,CAGGCC,CAUACG,CAUAGG,CAUCCG,CAUCGG,CCACAC,CCACAG,CCACCC,CCACCG,CCACGC,CCAGGC,CCAUAC,CCAUAG,CCAUCC,CCAUCG,CCCACA,CCCACC,CCCACG,CCCAGG,CCCAUA,CCCAUC,CCCCAC,CCCCAG,CCCCCA,CCCCCC,CCCCCG,CCCCGC,CCCCGG,CCCCUA,CCCCUC,…
HNRNPC	6	4082	0.00403458	0.00304435	0.406285	CUUUUU,GGGGGG,UUUUUA,UUUUUC,UUUUUU	AUUUUU,CUUUUU,GCAUAC,GGAUAC,GGAUAU,GGAUUC,GGGGGG,GGGUAC,UUUUUA,UUUUUC,UUUUUG,UUUUUU
HNRNPF	29	17722	0.0172911	0.0132146	0.387899	AAGGGA,AAUGUG,AGGAAG,AGGGAA,AGGGAU,AGGGGA,CUGGGG,GAAGGG,GAAGGU,GAAUGU,GAGGAA,GAGGGG,GGAAUG,GGAUGG,GGGAAU,GGGAUG,GGGGAA,GGGGAG,GGGGGG,UGGGGU,UGUGGG	AAGGCG,AAGGGA,AAGGGG,AAGGUG,AAUGUG,AGGAAG,AGGCGA,AGGGAA,AGGGAU,AGGGGA,AUGGGA,AUGGGG,AUGUGG,CGAUGG,CGGGAU,CGGGGG,CUGGGG,GAAGGG,GAAGGU,GAAUGU,GAGGAA,GAGGGG,GAUGGG,GGAAGG,GGAAUG,GGAGGA,GGAGGG,GGAUGG,GGCGAA,GGGAAG,GGGAAU,GGGAGG,GGGAUG,GGGCUG,GGGGAA,GGGGAG,GGGGCU,GGGGGC,GGGGGG,GGGGUA,UGGGAA,UGGGGU,UGUGGG
PCBP1	37	23771	0.021902	0.0177248	0.305296	AAACCA,AAUUCA,ACAUUA,ACCAAA,AUUCAC,AUUCCA,CAACCC,CAUCCC,CAUUCC,CCAACC,CCAUUC,CCCCAA,CCCCAC,CCCUCC,CCCUUC,CCUAAC,CCUCCC,CUAACC,CUUUCC,GGGGGG,UCCCCA,UUUUUU	AAAAAA,AAACCA,AAAUUA,AAAUUC,AACCAA,AAUUAA,AAUUAC,AAUUCA,AAUUCC,ACAUUA,ACCAAA,ACCCUC,ACCUUA,AUUAAA,AUUACC,AUUCAC,AUUCCA,AUUCCC,CAAACC,CAACCC,CAAUCC,CAAUUA,CACCCU,CAUACC,CAUCCC,CAUUAA,CAUUCC,CCAAAC,CCAACC,CCAAUC,CCACCC,CCAUAC,CCAUCC,CCAUUA,CCAUUC,CCCACC,CCCCAA,CCCCAC,CCCCCC,CCCUCC,CCCUCU,CCCUUA,CCCUUC,CCUAAC,CCUACC,CCUAUC,CCUCCC,CCUCUU,CCUUAA,CCUUAC,CCUUCC,CCUUUC,CUAACC,CUACCC,CUAUCC,CUUAAA,CUUACC,…
SRSF1	284	179509	0.164265	0.133846	0.295457	AAAAGA,AAAGAA,AAAGAG,AAAGGA,AAGAAG,AAGAGA,AAGAGG,AAGGAC,AAGGAG,ACAAGG,ACAGAA,ACAGAG,ACAGCA,ACAGGG,ACAGUG,ACGAAG,ACGCUC,ACUGAG,ACUGGA,AGAAGA,AGAAGG,AGACAG,AGAGAA,AGAGAC,AGAGCA,AGAGGA,AGAGGG,AGAUGG,AGCCGA,AGGAAA,AGGAAC,AGGAAG,AGGACU,AGGAGA,AGGAGC,AUGAAC,AUGAAG,AUGACA,AUGACU,AUGGAG,AUUUCA,CAACCA,CAACCC,CAAGCA,CAAGGA,CACAGA,CACAGC,CACCGA,CACGGA,CACUGG,CAGAAC,CAGAGA,CAGAGC,CAGCCG,CCAACC,CCAAGC,CCACAG,…	AAAAGA,AAAGAA,AAAGAC,AAAGAG,AAAGGA,AACACG,AACAGC,AACCGG,AAGAAC,AAGAAG,AAGACC,AAGAGA,AAGAGC,AAGAGG,AAGGAC,AAGGAG,AAGGCG,AAGGUG,AAUGAC,AAUUUC,ACAAGG,ACACGA,ACACGU,ACAGAA,ACAGAG,ACAGCA,ACAGCG,ACAGGA,ACAGGG,ACAGGU,ACAGUG,ACCCGA,ACCCGG,ACCCGU,ACCGGA,ACCGGU,ACGAAC,ACGAAG,ACGAAU,ACGACG,ACGCGA,ACGCGC,ACGCUC,ACGGAA,ACGGAC,ACUGAG,ACUGGA,AGAAGA,AGAAGG,AGACAA,AGACAG,AGACGA,AGACGU,AGAGAA,AGAGAC,AGAGCA,AGAGGA,…
HNRNPL	18	11970	0.010951	0.00892577	0.295015	AAACAA,AAAUAC,AACAAA,AACACA,AAUACA,ACACAA,ACACCA,ACCACA,CACAAA,CACAAC,CACAAG,CACACA,CACACC,CACCAC	AAACAA,AAACAC,AAAUAA,AAAUAC,AACAAA,AACACA,AAUAAA,AAUACA,ACACAA,ACACAC,ACACCA,ACACGA,ACAUAA,ACAUAC,ACCACA,CACAAA,CACAAC,CACAAG,CACACA,CACACC,CACCAC,CACGAA,CACGAC,CACGAG,CAUAAA,CAUACA
SRSF10	65	41645	0.0380403	0.0310519	0.292848	AAAAGA,AAAGAA,AAAGAG,AAAGGA,AAAGGG,AAGAAA,AAGAAG,AAGACA,AAGAGA,AAGAGG,AAGGAA,AAGGAG,AAGGGA,AGAGAA,AGAGAC,AGAGAG,AGAGGA,AGAGGG,CAAAGA,GAGAAA,GAGAAC,GAGAAG,GAGACA,GAGACG,GAGAGA,GAGAGG,GAGGAA,GAGGAG,GAGGGG	AAAAGA,AAAGAA,AAAGAC,AAAGAG,AAAGGA,AAAGGG,AAGAAA,AAGAAG,AAGACA,AAGAGA,AAGAGG,AAGGAA,AAGGAG,AAGGGA,AAGGGG,ACAAAG,AGACAA,AGAGAA,AGAGAC,AGAGAG,AGAGGA,AGAGGG,CAAAGA,GAAAGA,GACAAA,GAGAAA,GAGAAC,GAGAAG,GAGACA,GAGACC,GAGACG,GAGAGA,GAGAGC,GAGAGG,GAGGAA,GAGGAG,GAGGGA,GAGGGG
SF1	14	9468	0.00864553	0.00706024	0.292238	ACAGAC,ACUAAC,ACUUAU,AGUAAC,AGUAAG,CACAGA,CACCGA,CAGUCA,GCUGAC,UGCUGA,UGCUGC	ACAGAC,ACAGUC,ACCGAC,ACGAAC,ACUAAC,ACUAAG,ACUAAU,ACUAGC,ACUGAC,ACUUAU,AGUAAC,AGUAAG,AUACUA,AUUAAC,CACAGA,CACCGA,CACUGA,CAGUCA,CGCUGA,CUAACA,GACUAA,GCUAAC,GCUGAC,GCUGCC,UAACAA,UACGAA,UACUAA,UACUAG,UACUGA,UAGUAA,UAUACU,UGCUAA,UGCUGA,UGCUGC
NOVA2	11	7655	0.00691643	0.00570844	0.276931	AGGCAU,AGUCAU,GAGACA,GAGGCA,GAGUCA,GGGGGG,UUUUUU	AACACC,ACCACC,AGACAU,AGAUCA,AGCACC,AGGCAU,AGUCAU,AUCAAC,AUCACC,AUCAUC,CCUAGA,CUAGAU,GAGACA,GAGGCA,GAGUCA,GAUCAC,GGGGGG,UAGAUC,UUUUUU
HNRNPA2B1	30	19828	0.0178674	0.0147848	0.273216	AAGAAG,AAGGAA,AAGGAG,AGAAGC,AGAUAU,AGGAAC,AGGAGC,CAAGAA,CAAGGA,CAAGGG,CCAAGA,GAAGCC,GAAGGA,GGAACC	AAGAAG,AAGGAA,AAGGAG,AAGGGG,AAUUUA,ACUAGA,AGAAGC,AGACUA,AGAUAU,AGGAAC,AGGAGC,AGGGGC,AGUAGG,AUAGCA,AUAGGG,AUUUAA,CAAGAA,CAAGGA,CAAGGG,CCAAGA,CCAAGG,CGAAGG,CUAGAC,GAAGCC,GAAGGA,GACUAG,GCCAAG,GCGAAG,GGAACC,GGAGCC,GGGGCC,GUAGGG,UAGACA,UAGACU,UAGGGA,UAGGGU,UUAGGG,UUUAUA
SRSF7	59	38760	0.0345821	0.0289008	0.258916	AAAGGA,AAGAAG,AAGGAC,AAUGAU,AGAAGA,AGAGAA,AGAGAC,AGAGAG,AGAGAU,AGAGGA,AGGAAG,AUUGAU,CAGAGA,CGAAUG,CUGAGA,GAAGAA,GAAGGC,GAAUGA,GAGACU,GAGAGA,GAGGAA,GAUUGA,UCAACA,UCUUCA,UGAGAG	AAAGGA,AAGAAG,AAGGAC,AAGGCG,AAUGAU,ACGAAU,ACGACG,ACGAGA,ACGAUA,ACGAUU,ACUACG,ACUAGA,AGAAGA,AGACGA,AGACUA,AGAGAA,AGAGAC,AGAGAG,AGAGAU,AGAGGA,AGAUCA,AGAUCU,AGGAAG,AGGACA,AGGCGA,AUAGAA,AUAGAC,AUUGAC,AUUGAU,CAGAGA,CCGAGA,CGAAUG,CGACGA,CGAGAC,CGAGAG,CGAGAU,CGAUAG,CGAUUG,CUACGA,CUAGAG,CUCUUC,CUGAGA,CUUCAC,GAAGAA,GAAGGC,GAAUGA,GACAAA,GACGAC,GACGAG,GACGAU,GACUAC,GAGACU,GAGAGA,GAGAUC,GAGGAA,GAUAGA,GAUUGA,…
ENOX1	11	7765	0.00691643	0.00579045	0.25635	AAGACA,AAUACA,AGACAG,AGUACA,GGACAG,GUACAG	AAGACA,AAUACA,AGACAG,AGGACA,AGUACA,AUACAG,CAGACA,CAUACA,CGGACA,CGUACA,GGACAG,GUACAG,UAGACA,UAUACA,UGGACA,UGUACA
ERI1	2	1991	0.00172911	0.00148527	0.219305	UUCAGA,UUUCAG	UUCAGA,UUUCAG
RBM5	18	12691	0.010951	0.00946336	0.21064	AAGGAA,AAGGAG,AAGGUA,AGGGAA,AGGGAG,AGGGUG,CAAGGA,CAAGGG,CUUCUC,GAAGGA,GAAGGG,GAAGGU,GGGGGG	AAAAAA,AAGGAA,AAGGAG,AAGGGG,AAGGUA,AAGGUG,AGGGAA,AGGGAG,AGGGUA,AGGGUG,AGGUAA,CAAGGA,CAAGGG,CCCCCC,CUCUUC,CUUCUC,GAAGGA,GAAGGG,GAAGGU,GAGGGA,GAGGGU,GGGGGG,GGUGGU,UCUUCU,UUCUCU
CELF5	2	2004	0.00172911	0.00149496	0.20992	GUGUGU,GUGUUG	GUGUGG,GUGUGU,GUGUUG,GUGUUU,UGUGUG,UGUGUU
SSB	2	2027	0.00172911	0.00151211	0.193465	UGCUGU,UGUUUU	CUGUUU,GCUGUU,UGCUGU,UGUUUU
TUT1	2	2037	0.00172911	0.00151957	0.186368	AAAUAC,AAUACU	AAAUAC,AAUACU,AGAUAC,CAAUAC,CGAUAC,GAUACU
SRSF2	250	171030	0.144669	0.127523	0.181989	AAAAGA,AAAGAG,AAAGGA,AACCAG,AAGAAG,AAGAGA,AAGGAG,AAGUAC,AAUCCC,AAUGCC,ACCUGC,ACGCUG,ACUCCC,ACUCCU,AGAAGA,AGAAGC,AGAAUG,AGAGAA,AGAGAU,AGAGGA,AGAGUG,AGAUAA,AGCAGA,AGCCCC,AGCCGA,AGCCUC,AGCUGU,AGGAAG,AGGAGA,AGGAGC,AGGAGU,AGGCAG,AGGCUG,AGUAUC,AGUGAC,AGUGUU,AGUUCC,AUCACU,AUCCCC,AUGAAU,AUGAUG,AUGCUG,AUGGAG,AUUACU,AUUAGU,AUUCCA,AUUGAU,CAGAGA,CAGAGU,CAGUGG,CAGUGU,CCACCA,CCACUA,CCACUG,CCAGCC,CCAGGG,CCAGGU,…	AAAAGA,AAAGAG,AAAGGA,AACCAG,AACGAG,AAGAAG,AAGAGA,AAGCAG,AAGCGG,AAGCUG,AAGGAG,AAGGCG,AAGUAC,AAUACC,AAUCCC,AAUGCC,AAUGCU,ACCACC,ACCACU,ACCAGC,ACCAGU,ACCCCC,ACCCCU,ACCCGC,ACCCGG,ACCGGU,ACCGUA,ACCUCC,ACCUGC,ACGAGA,ACGAGG,ACGCUG,ACGGAG,ACGUGU,ACUACC,ACUACU,ACUAGA,ACUCAA,ACUCCC,ACUCCU,ACUGUA,AGAAGA,AGAAGC,AGAAUA,AGAAUG,AGACUA,AGAGAA,AGAGAU,AGAGGA,AGAGGU,AGAGUA,AGAGUG,AGAGUU,AGAUAA,AGAUCC,AGAUGC,AGCACU,…
ZCRB1	4	3419	0.00288184	0.00255001	0.176491	GACUUA,GGAUUA,GGCUUA	AAUUAA,ACUUAA,AUUUAA,GAAUUA,GACUUA,GAUUAA,GAUUUA,GCUUAA,GGAUUA,GGCUUA,GGUUUA,GUUUAA
PABPC1	18	13137	0.010951	0.0097959	0.160813	AAAAAC,ACAAAC,ACAAAU,ACUAAC,AGAAAA,CAAACA,CAAAUC,CUAACC,GAAAAA,GAAAAC	AAAAAA,AAAAAC,ACAAAC,ACAAAU,ACGAAC,ACGAAU,ACUAAC,ACUAAU,AGAAAA,CAAACA,CAAACC,CAAAUA,CAAAUC,CGAACA,CGAACC,CGAAUA,CGAAUC,CUAACA,CUAACC,CUAAUA,CUAAUC,GAAAAA,GAAAAC
SRSF9	57	40360	0.0334294	0.0300938	0.151651	AGGAAA,AGGAAC,AGGAGA,AGGAGC,AUGAAA,AUGAAC,AUGACA,AUGACC,AUGAGA,AUGAGC,GAAGCA,GAAGCC,GAAGGA,GAAGGC,GAUGCA,GAUGGA,GGAAAG,GGAACA,GGAACG,GGACAG,GGAGAA,GGAGAG,GGAGCA,GGAUGG,GGGUGG,UGAAAA,UGAACA,UGAAGC,UGAAGG,UGACAA,UGACAG,UGAGAA,UGAGAG,UGAGCA,UGAUGC,UGAUGG,UGGAGC	AGGAAA,AGGAAC,AGGACA,AGGACC,AGGAGA,AGGAGC,AUGAAA,AUGAAC,AUGACA,AUGACC,AUGAGA,AUGAGC,CUGGAU,GAAGCA,GAAGCC,GAAGGA,GAAGGC,GAUGCA,GAUGCC,GAUGGA,GAUGGC,GGAAAA,GGAAAG,GGAACA,GGAACG,GGAAGC,GGAAGG,GGACAA,GGACAG,GGACCA,GGACCG,GGAGAA,GGAGAG,GGAGCA,GGAGCC,GGAGCG,GGAGGA,GGAGGC,GGAUGC,GGAUGG,GGGAGC,GGGAGG,GGGUGC,GGGUGG,GGUGCA,GGUGCC,GGUGGA,GGUGGC,UGAAAA,UGAAAG,UGAACA,UGAACG,UGAAGC,UGAAGG,UGACAA,UGACAG,UGACCA,…
SYNCRIP	2	2132	0.00172911	0.0015904	0.120638	UUUUUU	AAAAAA,UUUUUU
NELFE	5	4354	0.00345821	0.00324716	0.0908495	CUGGCU,GGCUAA,GGUCUC,UCUCUG,UCUGGU	CUCUCU,CUCUGG,CUGGCU,CUGGUU,GCUAAC,GGCUAA,GGUCUC,GGUUAG,GUCUCU,UCUCUC,UCUCUG,UCUGGC,UCUGGU,UGGCUA,UGGUUA
IGF2BP1	1	1454	0.00115274	0.00108487	0.0875405	AAGCAC	AAGCAC,ACCCGU,AGCACC,CACCCG,CCCGUU,GCACCC
ELAVL4	9	7279	0.00576369	0.00542808	0.0865493	AUUUAU,GUAUCU,UAUUUA,UCUAAU,UUUAUU,UUUUAU,UUUUUA,UUUUUU	AAAAAA,AUCUAA,AUUUAU,GUAUCU,UAUCUA,UAUUUA,UAUUUU,UCUAAU,UGUAUC,UUAUUU,UUGUAU,UUUAUU,UUUGUA,UUUUAU,UUUUUA,UUUUUU
LIN28A	10	8218	0.00634006	0.00612822	0.0490284	AGGAGA,AGGAGU,CGGAGU,GGAGAA,GGAGAU,GGAGUA,UGGAGA,UGGAGU	AGGAGA,AGGAGU,CGGAGA,CGGAGG,CGGAGU,GGAGAA,GGAGAU,GGAGGA,GGAGGG,GGAGUA,UGGAGA,UGGAGG,UGGAGU
SRSF4	18	14411	0.010951	0.0107458	0.0272885	AAGAAG,AGAAGA,AGGAAG,GAAGAA,GAGGAA,GGAAGA	AAGAAG,AGAAGA,AGGAAG,GAAGAA,GAGGAA,GGAAGA
CSTF2	3	3052	0.00230548	0.00227637	0.0183321	GUGUGU,GUGUUG,UGUUUU	GUGUGU,GUGUUG,GUGUUU,GUUUUG,UGUGUG,UGUGUU,UGUUUG,UGUUUU
CELF2	3	3064	0.00230548	0.00228531	0.0126726	GUGUGU,GUUGUU,UGUUGU	AUGUGU,GUAUGU,GUCUGU,GUGUGU,GUUGUU,UAUGUG,UAUGUU,UGUGUG,UGUUGU,UUGUGU
SRSF6	55	43137	0.0322767	0.0321644	0.00502722	AACCUG,AAGAAG,ACCUGG,AGAAGA,AGGAAG,CAACCU,CACGGA,CACUGG,CAUCCU,CCACAG,CCACUG,CCUCAC,CCUCAG,CUACAC,CUCAGG,CUCAUC,CUUCAG,CUUCUC,CUUCUG,GAAGAA,GAGGAA,GCAGCA,GCUCAU,GGAAGA,UCAACC,UCACAC,UCACUC,UCAUCC,UCUCAC,UCUCUG,UUACUC,UUCACG,UUUCAG	AACCUG,AAGAAG,ACCGGG,ACCGUC,ACCUGG,AGAAGA,AGCACC,AGCGGA,AGGAAG,AUCAAC,AUCCUG,AUCGUA,CAACCU,CACACG,CACAGG,CACCUG,CACGGA,CACUCG,CACUGG,CAGCAC,CAUCCU,CCACAC,CCACAG,CCACUC,CCACUG,CCCGGC,CCUCAC,CCUCAG,CCUCUC,CCUCUG,CCUGGC,CGCGUC,CUACAC,CUACAG,CUACUC,CUACUG,CUCACG,CUCAGG,CUCAUC,CUCUCG,CUCUGG,CUUCAC,CUUCAG,CUUCUC,CUUCUG,GAAGAA,GACGUC,GAGGAA,GAUCAA,GCACCU,GCAGCA,GCCGGA,GCCGUC,GCUCAU,GGAAGA,UACACG,UACAGG,…
KHDRBS1	9	7751	0.00576369	0.00578001	-0.00408079	AUAAAA,AUUUAC,CAAAAU,CUAAAA,GAAAAC,UAAAAA,UAAAAG,UUUUUU	AUAAAA,AUUUAA,AUUUAC,CAAAAU,CUAAAA,CUAAAU,GAAAAC,UAAAAA,UAAAAC,UAAAAG,UUAAAA,UUAAAU,UUUUAC,UUUUUU
TIA1	16	13270	0.00979827	0.00989507	-0.0141827	AUUUUG,CUUUUG,CUUUUU,GUUUUC,GUUUUU,UCCUUU,UCUCCU,UUUAUU,UUUUAU,UUUUCU,UUUUGG,UUUUUA,UUUUUC,UUUUUU	AUUUUC,AUUUUG,AUUUUU,CCUUUC,CUCCUU,CUUUUA,CUUUUC,CUUUUG,CUUUUU,GUUUUA,GUUUUC,GUUUUG,GUUUUU,UAUUUU,UCCUUU,UCUCCU,UUAUUU,UUCUCC,UUUAUU,UUUUAU,UUUUCG,UUUUCU,UUUUGG,UUUUGU,UUUUUA,UUUUUC,UUUUUG,UUUUUU
ZRANB2	7	6256	0.00461095	0.00466532	-0.0169114	AGGGAA,AGGUAC,GAGGUU,GGGUGA,UAAAGG	AAAGGU,AGGGAA,AGGUAA,AGGUAC,AGGUAG,AGGUAU,AGGUCU,AGGUUA,AGGUUU,CGGUAA,CGGUAG,CGGUAU,CGGUCU,GAGGUU,GGGUAA,GGGUGA,GGUAAA,GGUGGU,GUAAAG,GUGGUG,UAAAGG,UGGUAA,UGGUGG
SAMD4A	6	5489	0.00403458	0.00409343	-0.0208915	CGGGAA,CGGGCA,CUGGAA,CUGGUC,GCUGGC	CGGGAA,CGGGAC,CGGGCA,CGGGCC,CGGGUA,CGGGUC,CUGGAA,CUGGAC,CUGGCA,CUGGCC,CUGGUA,CUGGUC,GCGGGA,GCGGGC,GCGGGU,GCUGGA,GCUGGC,GCUGGU
HNRNPA3	4	3928	0.00288184	0.00292953	-0.0236744	AAGGAG,AGGAGC,CAAGGA	AAGGAG,AGGAGC,CAAGGA,CCAAGG,GCCAAG,GGAGCC
PABPC5	11	9574	0.00691643	0.00713927	-0.0457503	AGAAAA,AGAAAG,AGAAAU,GAAAAU,GAAAGU,GAAAUU	AGAAAA,AGAAAG,AGAAAU,GAAAAU,GAAAGU,GAAAUU
SFPQ	63	51272	0.0368876	0.03823	-0.0515677	AAGAGG,AAGCAA,AAGGAA,AAGGAC,AAGGGA,AGAGAG,AGAGGA,AGGAAC,AGGGAU,CAGGCA,CUGGAG,GAAGAA,GAAGAG,GAAGCA,GAAGGA,GACUGG,GAGAGG,GAGGAA,GGAAGA,GGACUG,GGAGAG,GGGGAC,GGGGGA,GGGGGG,GUAAGA,GUCUGG,UAAGAG,UAAGGA,UAGUGU,UCUGGA,UGAAGC,UGAUGG,UGAUGU,UGGAAG,UGGAGA,UGGAGC,UGGUUG,UUAAUU,UUAGUG,UUGAUG,UUUUUU	AAGAAC,AAGAGC,AAGAGG,AAGCAA,AAGGAA,AAGGAC,AAGGGA,ACUGGG,AGAGAG,AGAGGA,AGAGGU,AGAUCG,AGGAAC,AGGACC,AGGGAU,AGGGGG,AUCGGA,CAGGCA,CUAAGG,CUGGAG,CUGGGA,GAAGAA,GAAGAG,GAAGCA,GAAGGA,GACUGG,GAGAGG,GAGGAA,GAGGAC,GAGGUA,GAUCGG,GCAGGC,GGAAGA,GGACUG,GGAGAG,GGAGGA,GGAGGG,GGGAUC,GGGGAC,GGGGAU,GGGGGA,GGGGGG,GGUAAG,GGUCUG,GUAAGA,GUAAUG,GUAAUU,GUAGUG,GUAGUU,GUCUGG,GUGAUG,GUGAUU,GUGGUG,GUGGUU,UAAGAG,UAAGGA,UAAGGG,…
RBFOX2	0	816	0.000576369	0.000609168	-0.0798483	UGACUG,UGCAUG	UGACUG,UGCAUG
RBM41	2	2455	0.00172911	0.00183123	-0.0827884	AUACAU,UACAUU	AUACAU,AUACUU,UACAUG,UACAUU,UACUUG,UACUUU,UUACAU,UUACUU
RBM3	6	5757	0.00403458	0.00429326	-0.0896532	AAAACU,AAGACU,AAUACU,GAGACG,GAGACU	AAAACG,AAAACU,AAACGA,AAACUA,AAGACG,AAGACU,AAUACG,AAUACU,AGACGA,AGACUA,AUACGA,AUACUA,GAAACG,GAAACU,GAGACG,GAGACU,GAUACG,GAUACU
KHSRP	24	20784	0.0144092	0.0154976	-0.105055	AGCCUC,AGCUUC,AUAUUU,AUUUAU,CAGCCU,CAGCUU,CCCCCU,CCCCUC,CCCUCC,CCCUUC,CUCCCU,CUGCUU,GCCUCC,GCUUCC,GGCUUC,GUGUGU,UAUUUA,UCCCUC,UGCUUC,UUAUUA,UUUAUU	ACCCUC,ACCUUC,AGCCUC,AGCUUC,AUAUUU,AUGUAU,AUGUGU,AUUAUU,AUUUAU,AUUUUA,CACCCU,CACCUU,CAGCCU,CAGCUU,CCCCCU,CCCCUC,CCCCUU,CCCUCC,CCCUUC,CCGCCU,CCGCUU,CCUUCC,CGCCCU,CGCCUC,CGCCUU,CGCUUC,CGGCCU,CGGCUU,CUCCCU,CUCCUU,CUGCCU,CUGCUU,CUGUAU,CUGUGU,GCCCUC,GCCUCC,GCCUUC,GCUUCC,GGCCUC,GGCUUC,GUAUAU,GUAUGU,GUGUAU,GUGUGU,UAGGUA,UAGGUU,UAGUAU,UAUAUU,UAUUAU,UAUUUA,UAUUUU,UCCCUC,UCCUUC,UGCAUG,UGCCUC,UGCUUC,UGUAUA,…
TRA2B	29	25149	0.0172911	0.0187522	-0.117036	AAAGAA,AAGAAG,AAGAAU,AAGGAA,AGAAGA,AGAAGG,AGGAAA,AGGAAG,GAAGAA,GAAGGA	AAAGAA,AAGAAC,AAGAAG,AAGAAU,AAGGAA,AAUAAG,AGAAGA,AGAAGG,AGGAAA,AGGAAG,AUAAGA,GAAAGA,GAAGAA,GAAGGA,GAAUUA,GGAAGG,UAAGAA
SRSF3	41	36054	0.0242075	0.0268832	-0.15125	AACUUU,ACUUCA,ACUUCU,AGAGAU,CACAAC,CACCAC,CAGAGA,CAUCAA,CAUCAC,CAUUCA,CCACCA,CUACAC,CUCCAA,CUUCAA,CUUCAG,CUUCAU,GACUUC,GCUUCA,UACAAC,UAUCAA,UCACAA,UCAGAG,UCAUCA,UCAUCC,UCAUCU,UCUCCA,UCUUCA,UUCAAC,UUCAUC	AACGAC,AACGAU,AACUUU,ACAUCA,ACAUCG,ACAUUC,ACCACC,ACGACG,ACGACU,ACGAUC,ACGAUU,ACUACA,ACUACG,ACUUCA,ACUUCG,ACUUCU,ACUUUA,AGAGAU,AUCAAC,AUCAUC,AUCGAC,AUCGAU,AUCGCU,AUCGUU,AUCUUC,AUUCAU,CAACGA,CACAAC,CACAUC,CACCAC,CACUAC,CACUUC,CAGAGA,CAUCAA,CAUCAC,CAUCAU,CAUCGA,CAUCGC,CAUCGU,CAUUCA,CCACCA,CCUCGU,CCUCUU,CGAUCG,CGCUUC,CUACAA,CUACAC,CUACAG,CUACGA,CUCCAA,CUCGUC,CUCUUC,CUUCAA,CUUCAC,CUUCAG,CUUCAU,CUUCGA,…
A1CF	3	3480	0.00230548	0.00259549	-0.170942	AUCAGU,UCAGUA,UUAAUU	AGUAUA,AUAAUU,AUCAGU,CAGUAU,GAUCAG,UAAUUA,UAAUUG,UCAGUA,UGAUCA,UUAAUU
SRSF5	26	23953	0.015562	0.0178605	-0.198747	AAGAAG,AGAAGA,AGGAAG,CAACAG,CACAGA,CACAGC,CACGGA,GAAGAA,GAGGAA,GGAAGA,UAAAGG,UACAGA	AACAGC,AAGAAG,AGAAGA,AGGAAG,AUAAAG,CAACAG,CACAGA,CACAGC,CACAUA,CACAUC,CACGGA,CACGGC,CACGUA,CACGUC,CCGCAG,CGCAGA,CGCAGC,CGCAGG,CGCAUA,CGCAUC,CGCGGA,CGCGGC,CGCGUA,CGCGUC,GAAGAA,GAGGAA,GGAAGA,UAAAGG,UACAGA,UACAGC,UACAUA,UACAUC,UACGGA,UACGGC,UACGUA,UACGUC,UGCAGA,UGCAGC,UGCAUA,UGCAUC,UGCGGA,UGCGGC,UGCGUA,UGCGUC
TRA2A	28	26334	0.0167147	0.0196358	-0.232369	AAAGAA,AAGAAA,AAGAAG,AAGAGG,AGAAAG,AGAAGA,AGAGGA,AGGAAG,GAAGAA,GAAGAG,GAGGAA	AAAGAA,AAGAAA,AAGAAG,AAGAGG,AGAAAG,AGAAGA,AGAGGA,AGGAAG,GAAAGA,GAAGAA,GAAGAG,GAGGAA
ZFP36	73	67240	0.0426513	0.050136	-0.233256	AAAAAC,AAAAAU,AAAACA,AAAAGA,AAACAA,AAAGAA,AAAGCA,AAAGGA,AAAGUA,AACAAA,AACAAG,AAGAAA,AAGCAA,AAGGAA,AAGUAA,ACAAAC,ACAAAU,ACAAGC,ACAAGG,ACCUGC,ACUUCU,AGAAAG,AGCAAA,AGGAAA,AUAAAC,AUAAGG,AUUUAU,CAAACA,CAAAGA,CAAGCA,CAAGGA,CAAGUA,CCCUCC,CCCUUC,GCAAAG,GGAAAG,UAAGGA,UAUUUA,UCCUCC,UCCUUU,UCUUGU,UCUUUU,UUGUGG,UUUAUU	AAAAAA,AAAAAC,AAAAAG,AAAAAU,AAAACA,AAAAGA,AAAAGC,AAAAGG,AAAAGU,AAAAUA,AAACAA,AAAGAA,AAAGCA,AAAGGA,AAAGUA,AAAUAA,AACAAA,AACAAG,AAGAAA,AAGCAA,AAGGAA,AAGUAA,AAUAAA,AAUAAG,ACAAAC,ACAAAG,ACAAAU,ACAAGC,ACAAGG,ACAAGU,ACCUCC,ACCUCU,ACCUGC,ACCUGU,ACCUUC,ACCUUU,ACUUCC,ACUUCU,ACUUGC,ACUUGU,ACUUUC,ACUUUU,AGAAAG,AGCAAA,AGGAAA,AGUAAA,AUAAAC,AUAAAG,AUAAAU,AUAAGC,AUAAGG,AUAAGU,AUUUAA,AUUUAU,CAAACA,CAAAGA,CAAAUA,…
YTHDC1	9	9201	0.00576369	0.00686116	-0.25146	GAAUGC,GAGUGC,GCAUGC,GGCUGC,UAAUAC,UAAUGC,UGAUGC,UGCUGC	GAAUAC,GAAUGC,GACUAC,GACUGC,GAGUAC,GAGUGC,GCAUAC,GCAUGC,GCCUAC,GCCUGC,GCGUAC,GCGUGC,GGAUAC,GGAUGC,GGCUAC,GGCUGC,GGGUAC,GGGUGC,UAAUAC,UAAUGC,UACUAC,UACUGC,UAGUAC,UAGUGC,UCAUAC,UCAUGC,UCCUAC,UCCUGC,UCGUAC,UCGUGC,UGAUAC,UGAUGC,UGCUAC,UGCUGC,UGGUAC,UGGUGC
YBX2	3	3732	0.00230548	0.00278338	-0.271776	AACAAC,AACAUC,ACAACA	AACAAC,AACAUC,ACAACA,ACAACG,ACAACU,ACAUCA,ACAUCG,ACAUCU
KHDRBS3	6	6581	0.00403458	0.00490764	-0.282611	AGAUAA,AUAAAA,AUAAAC,GAUAAA,UUUUUU	AAAUAA,AAUAAA,AGAUAA,AUAAAA,AUAAAC,AUAAAG,AUUAAA,GAUAAA,UAAAAC,UAAAUA,UUAAAC,UUUUUU
TIAL1	16	16088	0.00979827	0.0119962	-0.29198	AGUUUU,AUUUUG,CAGUUU,CUUUUG,CUUUUU,GUUUUC,GUUUUU,UUCAGU,UUUAUU,UUUCAG,UUUUAU,UUUUCA,UUUUUA,UUUUUC,UUUUUU	AAAUUU,AAUUUU,AGUUUU,AUUUUA,AUUUUC,AUUUUG,AUUUUU,CAGUUU,CUUUUA,CUUUUC,CUUUUG,CUUUUU,GUUUUC,GUUUUU,UAAAUU,UAUUUU,UCAGUU,UUAAAU,UUAUUU,UUCAGU,UUUAAA,UUUAUU,UUUCAG,UUUUAA,UUUUAU,UUUUCA,UUUUUA,UUUUUC,UUUUUG,UUUUUU
HNRNPDL	17	17225	0.0103746	0.012844	-0.308031	ACACCA,ACAGCA,ACAUUA,ACCAGA,ACUAAC,ACUGCA,AGAUAU,AUCUGA,AUUAGC,CACCAG,CAUUAG,CCAGAC,GGAGUA,GGAUUA,UCUGAC	AACAGC,AACCUU,AACUAA,AAUACC,AAUUUA,ACACCA,ACAGCA,ACAUUA,ACCACG,ACCAGA,ACCUUG,ACUAAC,ACUAAG,ACUAGA,ACUAGC,ACUAGG,ACUGCA,ACUUUA,AGAUAU,AGUAGC,AGUAGG,AUACCA,AUCUGA,AUGCGC,AUUAGC,AUUAGG,CACCAG,CACGCA,CACUAG,CAUUAG,CCACGC,CCAGAC,CCUUGC,CCUUUA,CGAGCA,CUAACA,CUAACU,CUAAGC,CUAAGU,CUAGAG,CUAGAU,CUAGCA,CUAGCC,CUAGCG,CUAGCU,CUAGGA,CUAGGC,CUAGUA,CUUGCC,CUUUAA,CUUUAG,GAACUA,GACUAG,GAGUAG,GAUUAG,GCACUA,GCGAGC,…
DAZAP1	11	11683	0.00691643	0.00871178	-0.33294	AGAUAU,AGGAAA,AGGAAG,AGGAUG,AGGUUG,AGUAAG,AGUUAA,AGUUUG,GGGGGG,UUUUUU	AAAAAA,AAUUUA,AGAUAU,AGGAAA,AGGAAG,AGGAUA,AGGAUG,AGGUAA,AGGUAG,AGGUUA,AGGUUG,AGUAAA,AGUAAG,AGUAGG,AGUAUA,AGUAUG,AGUUAA,AGUUAG,AGUUUA,AGUUUG,GGGGGG,GUAACG,UAGGAA,UAGGAU,UAGGUA,UAGGUU,UAGUAA,UAGUAU,UAGUUA,UAGUUU,UUUUUU
NOVA1	6	6908	0.00403458	0.00515146	-0.352562	CAGUCA,CAUUCA,GGGGGG,UCAGUC,UUUUUU	AACACC,ACCACC,AGCACC,AGUCAC,AUCAAC,AUCACC,AUCAUC,AUUCAU,CAGUCA,CAUUCA,CCCCCC,GGGGGG,UCAGUC,UCAUUC,UUCAUU,UUUUUU
RBM42	0	993	0.000576369	0.000741142	-0.362758	AACUAA,AACUAC,ACUAAG,ACUACG	AACUAA,AACUAC,ACUAAG,ACUACG
PABPN1	4	4988	0.00288184	0.00371988	-0.368263	AAAAGA,AGAAGA	AAAAGA,AGAAGA
HNRNPA1	34	35149	0.0201729	0.0262084	-0.37761	AAAGAG,AAGAGG,AAGGAG,AAGUAC,AGAGGA,AGAUAU,AGGAAG,AGGAGC,AGGGAC,AGGGCA,AGUGAA,AUUAGA,AUUUAU,CAAAGA,CAAGGA,CAGGGA,GAAGGU,GACUUA,GAGGAA,GAGGAG,GAGUGG,GGACUU,GGGACU,UUUAUU,UUUUUU	AAAAAA,AAAGAG,AAGAGG,AAGGAG,AAGGUG,AAGUAC,AAUUUA,ACUAGA,AGACUA,AGAGGA,AGAUAU,AGAUUA,AGGAAG,AGGAGC,AGGGAC,AGGGCA,AGGGUU,AGUACG,AGUAGG,AGUGAA,AGUGGU,AGUUAG,AUAGAA,AUAGCA,AUAGGG,AUUAGA,AUUUAA,AUUUAU,CAAAGA,CAAGGA,CAGGGA,CCAAGG,CCCCCC,CGUAGG,CUAGAC,GAAGGU,GACUAG,GACUUA,GAGGAA,GAGGAG,GAGUGG,GAUUAG,GCAGGC,GCCAAG,GGAAGG,GGACUU,GGAGCC,GGAGGA,GGCAGG,GGGACU,GGGCAG,GGGUUA,GGUGCG,GGUUAG,GUAAGU,GUACGC,GUAGGG,…
HNRNPD	4	5083	0.00288184	0.00379071	-0.395476	AGAUAU,AUUUAU,UAUUUA,UUUAUU	AAAAAA,AAUUUA,AGAUAU,AGUAGG,AUUUAU,UAUUUA,UUAGAG,UUAGGA,UUAGGG,UUAUUU,UUUAUU
YBX1	12	13334	0.0074928	0.00994279	-0.408147	AACAUC,ACACCA,ACCACA,CAACCA,CACACC,CACCAC,CAGCAA,CCACAA,CCACCA,GAUCUG	AACAUC,AACCAC,ACACCA,ACAUCA,ACAUCG,ACAUCU,ACCACA,ACCACC,AUCAUC,CAACCA,CACACC,CACCAC,CAGCAA,CAUCAU,CAUCGC,CAUCUG,CCACAA,CCACAC,CCACCA,CCAGCA,CCCUGC,CCUGCG,CUGCGG,GAUCUG,GCCUGC,GGUCUG,GUCUGC,UCCAGC,UGCGGU
SRP14	0	1090	0.000576369	0.000813467	-0.497091	CCUGUA,CGCCUG,CUGUAG,GCCUGU	CCUGUA,CGCCUG,CUGUAG,GCCUGU
ELAVL1	6	7675	0.00403458	0.00572335	-0.50444	AUUUAU,UAUUUA,UGUUUU,UUUAUU,UUUUUU	AUUUAU,CCCCCC,UAGUUU,UAUUUA,UAUUUU,UGAUUU,UGGUUU,UGUUUU,UUAGUU,UUAUUU,UUGAUU,UUGGUU,UUGUUU,UUUAGU,UUUAUU,UUUGGU,UUUGUU,UUUUUG,UUUUUU
PTBP1	20	23874	0.0121037	0.0178016	-0.556552	AGCUGU,CUAUCU,CUCCCC,CUCUUG,CUCUUU,CUUCUC,CUUUCC,CUUUUU,GCUCCC,GGGGGG,UCCCCC,UCUAUC,UCUUUU,UUUCUU,UUUUCU,UUUUUC,UUUUUU	ACUUUC,ACUUUU,AGCUGU,AUCUUC,AUUUUC,AUUUUU,CAUCUU,CCAUCU,CCCCCC,CCUCUU,CCUUCC,CCUUUC,CCUUUU,CUAUCU,CUCCAU,CUCCCC,CUCUCU,CUCUUA,CUCUUC,CUCUUG,CUCUUU,CUUCCU,CUUCUC,CUUCUU,CUUUCC,CUUUCU,CUUUUC,CUUUUU,GCUCCC,GCUGUG,GGCUCC,GGGGGG,GUCUUA,GUCUUU,UACUUU,UAGCUG,UAUUUU,UCCAUC,UCCCCC,UCCUCU,UCUAUC,UCUCUC,UCUCUU,UCUUCU,UCUUUC,UCUUUU,UUACUU,UUAUUU,UUCCCC,UUCCUU,UUCUCU,UUCUUC,UUCUUG,UUCUUU,UUUCCC,UUUCUU,UUUUCC,…
HNRNPAB	4	5942	0.00288184	0.0044312	-0.620704	AAGACA,CAAAGA	AAAGAC,AAGACA,ACAAAG,AGACAA,AUAGCA,CAAAGA,GACAAA
SART3	6	8397	0.00403458	0.00626168	-0.634131	AAAAAC,AGAAAA,GAAAAA,GAAAAC	AAAAAA,AAAAAC,AGAAAA,GAAAAA,GAAAAC
SNRPA	11	14542	0.00691643	0.0108435	-0.648731	ACCUGC,AGGAGA,AUGCUG,AUUGCA,CCUGCU,GAGCAG,GGAGAU,UGCACA,UUUCCU	ACCUGC,AGCAGU,AGGAGA,AGUAGG,AGUAGU,AUACCU,AUGCAC,AUGCUG,AUUCCU,AUUGCA,CAGUAG,CCUGCU,CUGCUA,GAGCAG,GAUACC,GAUUCC,GCAGUA,GGAGAU,GGGUAU,GGUAUG,GUAGGC,GUAGGG,GUAGUC,GUAGUG,GUAUGC,GUUACC,GUUUCC,UACCUG,UAUGCU,UCCUGC,UGCACA,UGCACC,UGCACG,UUACCU,UUCCUG,UUGCAC,UUUCCU
ELAVL2	23	30037	0.0138329	0.0223968	-0.695195	AAUUUG,AUAUUU,AUUUAC,AUUUAU,AUUUUG,CAUUUU,CUUAUA,CUUUUU,GUUUUC,GUUUUU,UAUUUA,UAUUUG,UCAUUU,UCUUUU,UUAAUU,UUUAUG,UUUAUU,UUUCUU,UUUUAU,UUUUUA,UUUUUC,UUUUUU	AAUUUA,AAUUUG,AAUUUU,AUACUU,AUAUUU,AUUAUU,AUUUAA,AUUUAC,AUUUAG,AUUUAU,AUUUUA,AUUUUC,AUUUUG,AUUUUU,CAUUUU,CUUAUA,CUUUAA,CUUUCU,CUUUUA,CUUUUU,GAUUUA,GAUUUU,GUAUUG,GUUUUA,GUUUUC,GUUUUU,UAAGUU,UAAUUU,UACUUU,UAGUUA,UAUACU,UAUAUA,UAUAUU,UAUGUU,UAUUAU,UAUUGA,UAUUGU,UAUUUA,UAUUUG,UAUUUU,UCAUUU,UCUUAU,UCUUUU,UGAUUU,UGUAUU,UUAAGU,UUAAUU,UUACUU,UUAGUU,UUAUAC,UUAUAU,UUAUGU,UUAUUG,UUAUUU,UUCAUU,UUCUUU,UUGAUU,…
MSI1	3	5347	0.00230548	0.00398755	-0.79044	AGGAAG,AGUAAG,AGUUGG	AGGAAG,AGGAGG,AGGUAG,AGGUGG,AGUAAG,AGUAGG,AGUUAG,AGUUGG,UAGGAA,UAGGAG,UAGGUA,UAGGUG,UAGUAA,UAGUAG,UAGUUA,UAGUUG
RBM20	2	4034	0.00172911	0.00300856	-0.799046	CUUCUC,UUUCUU	AUUCUA,AUUCUC,AUUCUU,CUUCUA,CUUCUC,CUUCUU,UUUCUA,UUUCUC,UUUCUU
IGHMBP2	0	1565	0.000576369	0.00116763	-1.01852	AAAAAA	AAAAAA
PPIE	17	31677	0.0103746	0.0236196	-1.18692	AAAAAU,AUAAAA,AUAUAA,AUAUUU,AUUUAU,UAAAAA,UAUAAA,UAUUUA,UUAAUA,UUAAUU,UUAUAA,UUAUUA,UUUAUU,UUUUAU,UUUUUA,UUUUUU	AAAAAA,AAAAAU,AAAAUA,AAAAUU,AAAUAA,AAAUAU,AAAUUA,AAAUUU,AAUAAA,AAUAAU,AAUAUA,AAUAUU,AAUUAA,AAUUAU,AAUUUA,AAUUUU,AUAAAA,AUAAAU,AUAAUA,AUAAUU,AUAUAA,AUAUAU,AUAUUA,AUAUUU,AUUAAA,AUUAAU,AUUAUA,AUUAUU,AUUUAA,AUUUAU,AUUUUA,AUUUUU,UAAAAA,UAAAAU,UAAAUA,UAAAUU,UAAUAA,UAAUAU,UAAUUA,UAAUUU,UAUAAA,UAUAAU,UAUAUA,UAUAUU,UAUUAA,UAUUAU,UAUUUA,UAUUUU,UUAAAA,UUAAAU,UUAAUA,UUAAUU,UUAUAA,UUAUAU,UUAUUA,UUAUUU,UUUAAA,…
RBM28	0	1860	0.000576369	0.00138759	-1.26752	AGUAGA,AGUAGG,AGUAGU,GAGUAG,GUGUAG,UGUAGA,UGUAGG,UGUAGU	AGUAGA,AGUAGG,AGUAGU,GAGUAG,GUGUAG,UGUAGA,UGUAGG,UGUAGU
RBM4	1	4287	0.00115274	0.0031972	-1.47175	CUCUUU	CCUCUU,CCUUCC,CCUUCU,CGCGCG,CGCGGG,CGCGGU,CUCUUU,CUUCCU,CUUCUU,GCGCGA,GCGCGC,GCGCGG,UCCUUC,UUCCUU,UUCUUG
PUM1	5	13710	0.00345821	0.0102231	-1.56374	AAUGUU,AAUUGU,AGAUAA,GUCCAG,UGUCCA	AAUAUU,AAUGUU,AAUUGU,ACAUAA,AGAAUU,AGAUAA,AUUGUA,CAGAAU,CCAGAA,CUUGUA,GAAUUG,GUAAAU,GUAAUA,GUACAU,GUAGAU,GUAUAU,GUCCAG,UAAAUA,UAAUAU,UAAUGU,UACAUA,UACAUC,UAGAUA,UAUAUA,UGUAAA,UGUAAU,UGUACA,UGUAGA,UGUAUA,UGUCCA,UUAAUG,UUGUAC,UUGUAG,UUUAAU
AGO2	1	5071	0.00115274	0.00378176	-1.714	AGUGCU	AAAAAA,AAAGUG,AAGUGC,AGUGCU,GUGCUU,UAAAGU
RBMS3	0	2606	0.000576369	0.00194382	-1.75383	AAUAUA,AUAUAG,AUAUAU,CAUAUA,CUAUAG,CUAUAU,UAUAGA,UAUAGC,UAUAUA,UAUAUC	AAUAUA,AUAUAG,AUAUAU,CAUAUA,CUAUAG,CUAUAU,UAUAGA,UAUAGC,UAUAUA,UAUAUC
PABPC4	0	3416	0.000576369	0.00254777	-2.14417	AAAAAA,AAAAAG	AAAAAA,AAAAAG
PUM2	0	3741	0.000576369	0.00279009	-2.27525	GUAAAU,GUACAU,GUAGAU,GUAUAU,UAAAUA,UACAUA,UACAUC,UAGAUA,UAUAUA,UGUAAA,UGUACA,UGUAGA,UGUAUA	GUAAAU,GUACAU,GUAGAU,GUAUAU,UAAAUA,UACAUA,UACAUC,UAGAUA,UAUAUA,UGUAAA,UGUACA,UGUAGA,UGUAUA

## Sheet: location in  circRNA seq 
Table showing the location of the motifs in the ALPK2 circRNA sequence.
motif	location	RBP
AAAAAC	41,447,1609	IGF2BP2,IGF2BP3,PABPC1,PABPC3,SART3,ZFP36
AAAAAU	1743	PPIE,ZFP36
AAAACA	448	IGF2BP2,IGF2BP3,PABPC3,ZFP36
AAAACC	1610	PABPC3
AAAACU	42,1284	RBM3
AAAAGA	1511	PABPN1,SRSF1,SRSF10,SRSF2,ZFP36
AAAAUC	336,558	IGF2BP2,IGF2BP3
AAACAA	449,650,1698	HNRNPL,ZFP36
AAACCA	1176	PCBP1,PCBP2
AAACUC	43,1121,1285	IGF2BP2,IGF2BP3
AAAGAA	1475,1643	SRSF1,SRSF10,TRA2B,ZFP36,TRA2A
AAAGAG	1512	HNRNPA1,SRSF1,SRSF10,SRSF2
AAAGCA	225	ZFP36
AAAGGA	353,807,1339	SRSF10,SRSF7,ZFP36,SRSF1,SRSF2
AAAGGG	177	SRSF10
AAAGUA	566,1437	ZFP36
AAAUAC	575	HNRNPL,IGF2BP2,IGF2BP3,TUT1
AAAUCA	184	IGF2BP2,IGF2BP3
AACAAA	647	HNRNPL,ZFP36
AACAAC	651	YBX2
AACAAG	358,450,1699	ZFP36
AACACA	392,1652	HNRNPL,IGF2BP2,IGF2BP3
AACAUC	204	YBX1,YBX2
AACCAG	1177	SRSF2
AACCCU	715,1612	PCBP2
AACCUG	119,812,1427	NXF1,SRSF6
AACUCA	1286	IGF2BP2,IGF2BP3
AACUUU	699	SRSF3
AAGAAA	174,222,399	SRSF10,ZFP36,TRA2A
AAGAAG	171,219,996,1412,1602,1644	HNRNPA2B1,SRSF1,SRSF10,SRSF11,SRSF2,SRSF4,SRSF5,SRSF6,SRSF7,TRA2A,TRA2B,RBMX
AAGAAU	1476	TRA2B
AAGACA	453,470	ENOX1,HNRNPAB,SRSF10
AAGACU	678	RBM3
AAGAGA	858,1198,1246,1325,1513,1570	SRSF1,SRSF10,SRSF2
AAGAGG	1355	HNRNPA1,SFPQ,SRSF10,TRA2A,SRSF1
AAGCAA	1194,1605	SFPQ,ZFP36
AAGCAC	1028	IGF2BP1
AAGGAA	200,215,354,808,1366	FMR1,HNRNPA2B1,HNRNPM,RBM5,SFPQ,SRSF10,TRA2B,ZFP36,RBMX
AAGGAC	1340	SFPQ,SRSF1,SRSF7
AAGGAG	1170	FMR1,HNRNPA1,HNRNPA2B1,HNRNPA3,RBM5,SRSF10,SRSF1,SRSF2
AAGGGA	1400,1664	FMR1,HNRNPF,HNRNPH1,HNRNPH2,HNRNPH3,SFPQ,SRSF10
AAGGUA	1449	RBM5
AAGUAA	388	ZFP36,RBMX
AAGUAC	567,1438	HNRNPA1,SRSF2
AAUACA	576	ENOX1,HNRNPL,IGF2BP2,IGF2BP3
AAUACU	1685	RBM3,TUT1
AAUCCA	273	RBM6
AAUCCC	560,1406	SRSF2
AAUCUU	308	MATR3
AAUGAA	1396	RBM46
AAUGAU	55,518,1151,1746	RBM46,SRSF7
AAUGCC	1421	SRSF2
AAUGUG	1575	HNRNPF,HNRNPH1,HNRNPH2,HNRNPH3
AAUGUU	765	PUM1
AAUUCA	428,1165	IGF2BP2,IGF2BP3,PCBP1,PCBP2
AAUUGU	108	PUM1
AAUUUG	1206	ELAVL2
ACAAAC	648,1048	HNRNPLL,IGF2BP2,IGF2BP3,PABPC1,ZFP36
ACAAAU	1655	PABPC1,ZFP36
ACAACA	1442	YBX2
ACAAGA	451,468,1323	RBMY1A1
ACAAGC	1700	ZFP36
ACAAGG	359	SRSF1,ZFP36
ACAAUC	1218	IGF2BP2,IGF2BP3
ACACAA	1653	HNRNPL
ACACCA	1527	HNRNPDL,HNRNPL,HNRNPLL,YBX1
ACAGAA	395,571,1103,1445	SRSF1
ACAGAC	1628	SF1
ACAGAG	1253	SRSF1
ACAGCA	1532	HNRNPDL,SRSF1
ACAGGG	132,138,158,1052,1108	SRSF1
ACAGUG	473,633,687	SRSF1
ACAUUA	315,579	HNRNPDL,PCBP1,PCBP2
ACCAAA	1740	PCBP1,PCBP2,RBMX
ACCACA	1529	HNRNPL,HNRNPLL,YBX1
ACCAGA	1178	HNRNPDL
ACCCAC	102	G3BP1
ACCCCA	991	HNRNPK
ACCCUA	716	PCBP2
ACCCUU	1454,1613	HNRNPK
ACCUGC	813	SNRPA,SRSF2,ZFP36
ACCUGG	120,750	SRSF6
ACGAAG	855	SRSF1
ACGCUC	544	MBNL1,SRSF1
ACGCUG	942	MBNL1,SRSF2
ACUAAC	1495	HNRNPDL,PABPC1,QKI,SF1
ACUCCC	242,1123	SRSF2
ACUCCU	258	SRSF2
ACUGAG	824	SRSF1
ACUGCA	611	HNRNPDL,HNRNPLL
ACUGGA	368,1716	SRSF1
ACUGGU	1544	FMR1
ACUUAU	1344	QKI,SF1
ACUUCA	1622	SRSF3
ACUUCU	1520	SRSF3,ZFP36
AGAAAA	1282	PABPC1,PABPC5,SART3
AGAAAG	175,223,844,1435	PABPC5,ZFP36,TRA2A
AGAAAU	400,573	PABPC5
AGAAGA	172,220,397	PABPN1,SRSF1,SRSF2,SRSF4,SRSF5,SRSF6,SRSF7,TRA2A,TRA2B
AGAAGC	1413,1603	HNRNPA2B1,SRSF2
AGAAGG	198,1447,1645,1669	SRSF1,TRA2B,RBMX
AGAAUG	1573	SRSF2
AGACAG	454,471,1183,1251	ENOX1,FXR2,SRSF1
AGACGG	1311	FXR2
AGAGAA	97,1433,1571	SRSF1,SRSF10,SRSF2,SRSF7
AGAGAC	1181,1249,1516	SRSF1,SRSF10,SRSF7
AGAGAG	1199,1247,1326,1514	SFPQ,SRSF10,SRSF7
AGAGAU	709,859,1255	SRSF2,SRSF3,SRSF7
AGAGCA	1597	SRSF1
AGAGGA	1201	HNRNPA1,NONO,SFPQ,SRSF1,SRSF10,SRSF2,SRSF7,TRA2A
AGAGGG	1356	SRSF1,SRSF10
AGAGUG	1328,1503	RBM24,SRSF2
AGAUAA	711	KHDRBS3,PUM1,SRSF2
AGAUAU	1115	DAZAP1,HNRNPA0,HNRNPA1,HNRNPA2B1,HNRNPD,HNRNPDL
AGAUGG	861	SRSF1
AGCAAA	555,1606	ZFP36
AGCAGA	1016	SRSF2
AGCAGC	1013,1534,1537	FMR1
AGCAUG	828	RBFOX1
AGCCCC	1488	SRSF2
AGCCGA	1416	SRSF2,SRSF1
AGCCUC	590	KHSRP,SRSF2
AGCGAC	1540	FMR1
AGCUGU	1734	PTBP1,SRSF2
AGCUUC	584	KHSRP
AGGAAA	1367	DAZAP1,SRSF1,SRSF9,TRA2B,ZFP36
AGGAAC	201,355,809	HNRNPA2B1,NONO,SFPQ,SRSF1,SRSF9
AGGAAG	216	DAZAP1,FMR1,HNRNPA1,MSI1,SRSF1,SRSF2,SRSF4,SRSF5,SRSF6,SRSF7,TRA2A,TRA2B,HNRNPF,HNRNPH1,RBMX
AGGAAU	1162,1203	FMR1
AGGACU	1341	SRSF1
AGGAGA	1171	LIN28A,SNRPA,SRSF1,SRSF2,SRSF9
AGGAGC	1010	HNRNPA1,HNRNPA2B1,HNRNPA3,SRSF1,SRSF2,SRSF9
AGGAGU	732	FMR1,LIN28A,SRSF2
AGGAUG	1083	DAZAP1,FMR1,G3BP2
AGGCAC	362	FMR1,G3BP1
AGGCAG	1385,1593	G3BP1,SRSF2
AGGCAU	1672	NOVA2
AGGCUG	1140	SRSF2
AGGGAA	1401	HNRNPF,HNRNPH1,HNRNPH2,HNRNPH3,RBM5,ZRANB2
AGGGAC	134,160	HNRNPA1
AGGGAG	1665	FMR1,RBM5
AGGGAU	1054,1291	ESRP1,HNRNPF,SFPQ
AGGGCA	179	HNRNPA1
AGGGGA	1110	HNRNPF,HNRNPH1,HNRNPH2,HNRNPH3
AGGGUG	1379	RBM5
AGGUAC	1450	ZRANB2
AGGUUG	81	DAZAP1
AGUAAC	389	SF1,RBMX
AGUAAG	1243	DAZAP1,MSI1,SF1
AGUACA	568,1439	ENOX1
AGUAUC	756	SRSF2
AGUCAU	297,434	NOVA2
AGUGAA	674	HNRNPA1
AGUGAC	689,1099,1214	SRSF2
AGUGCU	87	AGO2
AGUGUG	320	RBM24
AGUGUU	1302	SRSF2,RBMX
AGUUAA	1681	DAZAP1
AGUUCC	1553	SRSF2
AGUUGG	1000	MSI1
AGUUUG	799	DAZAP1
AGUUUU	735	TIAL1
AUAAAA	1509	KHDRBS1,KHDRBS2,KHDRBS3,PPIE
AUAAAC	1119	KHDRBS2,KHDRBS3,ZFP36
AUAAGG	213	ZFP36
AUACAU	577	RBM41
AUAUAA	1117	PPIE
AUAUUU	438	ELAVL2,KHSRP,PPIE
AUCAAA	490,1762	RBM46,RBMX
AUCACU	981	SRSF2
AUCAGU	1240	A1CF
AUCCAA	274,384	RBM6
AUCCAG	1158	RBM6
AUCCCA	561,1407	RBMX
AUCCCC	1042	RBMX,SRSF2
AUCUGA	601	HNRNPDL
AUCUUG	309	MATR3
AUGAAA	153,444	RBM46,SRSF9
AUGAAC	696	SRSF1,SRSF9
AUGAAG	168,534,1259,1397	RBM46,SRSF1
AUGAAU	1236	RBM46,SRSF2
AUGACA	129	FXR1,SRSF1,SRSF9
AUGACC	747	SRSF9
AUGACG	779,852	FXR1
AUGACU	1058	SRSF1
AUGAGA	195	SRSF9
AUGAGC	1295	SRSF9
AUGAUG	519,531,744,1747	RBM46,SRSF2
AUGAUU	1152	RBM46
AUGCCA	1422	MBNL1
AUGCUG	1560,1750	SNRPA,SRSF2
AUGGAG	1348	FMR1,SRSF2,SRSF1
AUUACU	786	SRSF2
AUUAGA	841	HNRNPA1
AUUAGC	581	HNRNPDL
AUUAGU	317	SRSF2
AUUCAA	429,1166	SNRNP70
AUUCAC	282	PCBP1,PCBP2
AUUCCA	480	PCBP1,PCBP2,SRSF2
AUUGAU	191	SRSF2,SRSF7
AUUGCA	404,1659	SNRPA,SNRPB2
AUUGGG	301	HNRNPH1,HNRNPH2,HNRNPH3
AUUUAC	620	ELAVL2,KHDRBS1
AUUUAU	440	ELAVL1,ELAVL2,ELAVL3,ELAVL4,HNRNPA1,HNRNPD,KHSRP,PPIE,ZFP36,ZFP36L2
AUUUCA	1583	SRSF1
AUUUUG	1067	ELAVL2,TIA1,TIAL1
CAAAAU	557	KHDRBS1
CAAACA	649,1049	HNRNPLL,IGF2BP2,IGF2BP3,PABPC1,ZFP36
CAAAGA	1474,1642	HNRNPA1,HNRNPAB,SRSF10,ZFP36
CAAAUC	183,271,1764	IGF2BP2,PABPC1
CAACAC	1651	IGF2BP2
CAACAG	1443,1626	SRSF5
CAACCA	277	SRSF1,YBX1
CAACCC	653,989,1587	HNRNPK,PCBP1,SRSF1
CAACCU	1426	SRSF6
CAAGAA	995,1411,1601	HNRNPA2B1
CAAGAC	452,469	RBMY1A1
CAAGCA	1027,1193	SRSF1,ZFP36
CAAGGA	1169,1365	HNRNPA1,HNRNPA2B1,HNRNPA3,RBM5,SRSF1,ZFP36
CAAGGG	1663	HNRNPA2B1,RBM5
CAAGUA	387	ZFP36
CACAAA	1047,1654	HNRNPL
CACAAC	987	HNRNPL,SRSF3
CACAAG	467	HNRNPL
CACACA	615	HNRNPL,HNRNPLL,IGF2BP2,IGF2BP3
CACACC	1526	HNRNPL,HNRNPLL,YBX1
CACACU	365	QKI
CACAGA	394	SF1,SRSF1,SRSF5
CACAGC	663,1531	SRSF1,SRSF5
CACCAC	1528	HNRNPL,HNRNPLL,YBX1,SRSF3
CACCAG	1079	HNRNPDL
CACCGA	727	SF1,SRSF1
CACGGA	499	SRSF1,SRSF6,SRSF5
CACUAA	1494	QKI
CACUCA	983	IGF2BP2,IGF2BP3
CACUGC	961,1129	HNRNPLL
CACUGG	367	SRSF1,SRSF6
CAGAAC	1104	SRSF1
CAGAGA	96,708,1180,1254	SRSF1,SRSF2,SRSF3,SRSF7
CAGAGC	1596	SRSF1
CAGAGU	1018,1502	SRSF2
CAGCAA	554	YBX1
CAGCCG	1388	SRSF1
CAGCCU	589	KHSRP
CAGCGA	1539	ZC3H10
CAGCUG	252,1317,1733	FMR1
CAGCUU	665	KHSRP
CAGGCA	1592	G3BP1,SFPQ
CAGGGA	133,159,1053,1290	HNRNPA1
CAGUCA	296	NOVA1,SF1
CAGUGA	673,688,1098,1213	ACO1
CAGUGC	474,634	ACO1
CAGUGG	907	ACO1,SRSF2
CAGUGU	1301	ACO1,SRSF2
CAGUUU	798	TIAL1
CAUCAA	489	SRSF3
CAUCAC	980	SRSF3
CAUCCC	1041	HNRNPK,PCBP1
CAUCCU	206	SRSF6
CAUUAG	316,580	HNRNPDL
CAUUCA	281	IGF2BP2,IGF2BP3,NOVA1,SRSF3
CAUUCC	479	PCBP1
CAUUUU	1066	CPEB2,ELAVL2
CCAACC	276,1425	HNRNPK,PCBP1,SRSF1
CCAAGA	994,1410	HNRNPA2B1
CCAAGC	1026,1192	SRSF1
CCACAA	104,466,1046	YBX1
CCACAG	662,1530	G3BP1,SRSF1,SRSF6
CCACCA	1189	SRSF1,YBX1,SRSF2,SRSF3
CCACUA	1493	SRSF2
CCACUG	960,1128	SRSF1,SRSF2,SRSF6
CCAGAC	1712	HNRNPDL
CCAGCC	657	SRSF1,SRSF2
CCAGGA	1081,1160	SRSF1
CCAGGC	1591	G3BP1
CCAGGG	1377	SRSF1,SRSF2
CCAGGU	246,626,1705	SRSF2
CCAGUC	295	SRSF2
CCAGUG	672,1212,1300	SRSF2
CCAGUU	327	SRSF2
CCAUGG	483	SRSF1
CCAUUC	280	IGF2BP2,PCBP1,PCBP2
CCCACA	103,661,1045	G3BP1,SRSF2
CCCACU	1127,1492	SRSF1
CCCAGC	656	SRSF1
CCCAGG	245,625,1590	G3BP1,SRSF1
CCCAUG	1557	SRSF1
CCCCAA	992	HNRNPK,PCBP1
CCCCAC	1044,1126,1491	G3BP1,HNRNPK,PCBP1
CCCCCA	1490	G3BP1,HNRNPK,PCBP2,SRSF1,SRSF2
CCCCCU	264	HNRNPK,KHSRP,PCBP2
CCCCGG	234	G3BP1,SRSF1
CCCCUC	265	G3BP1,KHSRP
CCCGCU	595	MBNL1,SRSF2
CCCGGG	235	SRSF1
CCCUAA	717	PCBP2
CCCUCC	266,291	G3BP1,KHSRP,PCBP1,PCBP2,SRSF1,ZFP36
CCCUUC	1455,1614	KHSRP,PCBP1,PCBP2,RC3H1,ZFP36
CCGAGG	729,1137	SRSF1
CCGCUA	596	MBNL1,SRSF1,SRSF2
CCGGGA	1391	SRSF1
CCGGGC	236	SRSF1
CCGUGG	639	SRSF1
CCUAAC	116,718	PCBP1
CCUCAC	1076	SRSF6
CCUCAG	904,1730	SRSF2,SRSF6
CCUCCA	267,292	PCBP2,SRSF1
CCUCCC	261,592	PCBP1,PCBP2
CCUCCU	1727	PCBP2
CCUGCU	814	MBNL1,SNRPA,SRSF2
CCUGGA	121,751	SRSF1
CCUGGG	883	SRSF1
CGAAUG	1419	SRSF7
CGACUG	1542	FMR1
CGAGGA	730	SRSF1,SRSF2
CGAGGC	1138	SRSF1
CGAUGA	850	SRSF1
CGCUAU	597	SRSF1
CGCUGG	943	SRSF1
CGGAGU	1550	LIN28A,SRSF2
CGGCAG	1314	G3BP1,SRSF1
CGGGAA	1392	SAMD4A
CGGGCA	237	RBM25,SAMD4A,SRSF1
CGGUCC	1033	SRSF1
CGGUGA	871	FUS
CUAAAA	39	KHDRBS1
CUAACC	117,719,1496	PABPC1,PCBP1,PCBP2,QKI
CUACAC	724	SRSF3,SRSF6
CUAUCU	599	PTBP1
CUAUGG	951	FMR1
CUCAGG	1288	SRSF1,SRSF6
CUCAUC	91,1039	SRSF6
CUCCAA	268,1024,1639	SRSF2,SRSF3
CUCCCA	243	PCBP2,SRSF2
CUCCCC	232,262,1124	PCBP2,PTBP1
CUCCCG	593,1134	SRSF2
CUCCCU	289	KHSRP,PCBP2
CUCCUA	114	SRSF2
CUCGGC	34	G3BP1
CUCUUG	1265	PTBP1
CUCUUU	46	PTBP1,RBM4
CUGAAC	512	SRSF1
CUGACU	255	SRSF1
CUGAGA	1430	SRSF7
CUGAGC	825,1485	SRSF1
CUGAGG	603	FMR1
CUGAUG	771,1563	SRSF2
CUGCCA	1374,1470	MBNL1
CUGCUC	1131,1223,1465	MBNL1
CUGCUG	815,963,1143,1482,1753	MBNL1
CUGCUU	69	KHSRP,MBNL1
CUGGAA	122,761	SAMD4A
CUGGAG	369,752,1717	SFPQ
CUGGCU	966	NELFE
CUGGGC	945	FMR1
CUGGGG	818	HNRNPF,HNRNPH1,HNRNPH2
CUGGUC	1545	SAMD4A
CUGGUG	1272	FMR1
CUGUCU	1756	CELF1
CUUAUA	210	ELAVL2
CUUCAA	1616,1623	SRSF3
CUUCAG	586,1095	SRSF3,SRSF6
CUUCAU	1457	SRSF3
CUUCUC	1521	PTBP1,RBM5,SRSF6,RBM20
CUUCUG	970	RC3H1,SRSF6
CUUUCC	668	PCBP1,PTBP1
CUUUUG	48	TIA1,TIAL1
CUUUUU	419	CPEB2,ELAVL2,HNRNPC,HNRNPCL1,PTBP1,TIA1,TIAL1
GAAAAA	446	PABPC1,SART3
GAAAAC	1283	IGF2BP2,KHDRBS1,PABPC1,PABPC3,SART3
GAAAAU	335,1148	PABPC5
GAAAGG	176,1338	SRSF1,SRSF2
GAAAGU	1436	PABPC5
GAAAUC	1369,1404	IGF2BP2
GAAAUU	401	PABPC5
GAACAG	1106	SRSF1
GAAGAA	170,173,218,221,398	SFPQ,SRSF1,SRSF2,SRSF4,SRSF5,SRSF6,SRSF7,TRA2A,TRA2B
GAAGAC	677	SRSF1
GAAGAG	857	SFPQ,SRSF1,TRA2A
GAAGAU	125	SRSF1
GAAGCA	1604	SFPQ,SRSF1,SRSF9
GAAGCC	1414	HNRNPA2B1,SRSF1,SRSF9
GAAGCU	1261	SRSF1
GAAGGA	199	FMR1,HNRNPA2B1,HNRNPM,RBM5,SFPQ,SRSF1,SRSF9,TRA2B,RBMX
GAAGGC	536,1646,1670	SRSF1,SRSF2,SRSF7,SRSF9
GAAGGG	1399	FMR1,HNRNPF,HNRNPH1,HNRNPH2,HNRNPH3,RBM5
GAAGGU	1448	RBM5,SRSF1,HNRNPA1,HNRNPF,HNRNPH1
GAAUGA	54,1395	SRSF1,SRSF7,TARDBP
GAAUGC	1420	SRSF2,YTHDC1
GAAUGG	912	TARDBP
GAAUGU	764,1574	HNRNPF,HNRNPH1,HNRNPH2,HNRNPH3,TARDBP
GAAUUC	866,1164	IGF2BP2
GACAAG	1322	FMR1,FXR2
GACAGA	455,1102,1252	CNOT4,FXR2,SRSF1
GACAGG	131,137	FMR1,FXR2,SRSF1
GACCUG	509,749	SRSF2
GACGAA	854	ANKHD1,FXR2,SRSF1
GACGCU	941	SRSF2
GACGGA	781	FXR2,SRSF1,SRSF2
GACGGC	1312	SRSF1
GACUCA	1631	SRSF2
GACUCC	257	SRSF2
GACUGA	823	SRSF1
GACUGG	1543,1715	FMR1,SFPQ,SRSF1
GACUUA	1343	HNRNPA1,ZCRB1
GACUUC	1519	SRSF3
GAGAAA	1173,1434	SRSF10
GAGAAC	98	SRSF1,SRSF10
GAGAAG	197,1668	SRSF1,SRSF10,SRSF2
GAGAAU	1572	SRSF2
GAGACA	1182,1250	NOVA2,SRSF1,SRSF10
GAGACG	1310	RBM3,SRSF1,SRSF10
GAGACU	1517	RBM3,SRSF7
GAGAGA	1248,1432,1515	SRSF10,SRSF2,SRSF7
GAGAGG	372,1200	NONO,SFPQ,SRSF10,SRSF2
GAGAGU	1327	SRSF2
GAGAUA	710,1114	SRSF2
GAGAUG	860,1256	SRSF2
GAGCAG	1012	SNRPA,SRSF1,SRSF2
GAGGAA	1202	HNRNPA1,NONO,SFPQ,SRSF1,SRSF10,SRSF2,SRSF4,SRSF5,SRSF6,SRSF7,TRA2A,HNRNPF,HNRNPH1
GAGGAG	731,1009	HNRNPA1,SRSF1,SRSF10,SRSF2
GAGGCA	605,1384	NOVA2,SRSF1
GAGGGG	1357	HNRNPF,HNRNPH1,HNRNPH2,HNRNPH3,SRSF1,SRSF10
GAGGUU	80	ZRANB2
GAGUAU	755	SRSF2
GAGUCA	1277	NOVA2
GAGUGA	1504,1720	RBM24,SRSF2
GAGUGC	86	YTHDC1
GAGUGG	1329	HNRNPA1,RBM24
GAUAAA	1508	KHDRBS2,KHDRBS3
GAUAUA	1116	RBMS1
GAUCUG	58	YBX1
GAUGAA	533,1235,1258	RBM46,SRSF1
GAUGAC	128,746,851,1057	SRSF1
GAUGAU	743	RBM46,SRSF1,SRSF2
GAUGCA	1565	SRSF1,SRSF9
GAUGCU	1749	SRSF1,SRSF2
GAUGGA	862,1085	SRSF1,SRSF2,SRSF9
GAUGGU	503,521	SRSF1
GAUUAC	785	SRSF2
GAUUGA	190	SRSF2,SRSF7
GCAAAG	805	ZFP36
GCAAUC	306	IGF2BP2
GCACAC	364,614	HNRNPLL,IGF2BP2
GCACGG	1030	SRSF1
GCACUC	240	IGF2BP2
GCAGAG	1017,1595	SRSF2
GCAGCA	1014,1535	SRSF1,SRSF6
GCAGCG	1538	SRSF1,ZC3H10
GCAGCU	1316	FMR1
GCAUGC	1674	RBFOX1,YTHDC1
GCAUGU	829	RBFOX1
GCAUUC	478	IGF2BP2
GCCAAA	1472	SRSF2
GCCACC	1188	SRSF2
GCCACU	959	SRSF2
GCCCAC	660	HNRNPK,SRSF1,SRSF2
GCCCAG	705	HNRNPK
GCCCCC	1489	HNRNPK,SRSF2
GCCGGG	1390	SRSF1
GCCUCC	591	KHSRP,SRSF2
GCGACU	1541	FMR1
GCUCAU	90	SRSF6
GCUCCC	1133	SRSF2,PTBP1
GCUGAC	254,1319	SF1
GCUGAG	1484	FMR1
GCUGAU	1562	SRSF2
GCUGCU	1142,1752	MBNL1,SRSF2
GCUGGC	965	SAMD4A
GCUGGG	817,944	FMR1,SRSF1
GCUUCA	585	SRSF3
GCUUCC	71	KHSRP
GCUUUU	418	MBNL1
GGAAAG	1337	SRSF1,SRSF9,ZFP36
GGAACA	202,356	SRSF1,SRSF9
GGAACC	810	HNRNPA2B1,SRSF2
GGAACG	1088	SRSF9
GGAAGA	124,217	SFPQ,SRSF1,SRSF4,SRSF5,SRSF6
GGAAUG	53,763,911,1394	HNRNPF,HNRNPH1,HNRNPH2,HNRNPH3,SRSF1,SRSF2
GGACAG	136	ENOX1,FMR1,FXR2,SRSF1,SRSF9
GGACUG	822	SFPQ,SRSF1,SRSF2
GGACUU	1342	HNRNPA1
GGAGAA	1172,1667	LIN28A,SRSF1,SRSF2,SRSF9
GGAGAC	1309	SRSF1
GGAGAG	371	SFPQ,SRSF2,SRSF9
GGAGAU	1113	LIN28A,SNRPA,SRSF1,SRSF2
GGAGCA	1011,1350	SRSF1,SRSF9
GGAGUA	754	HNRNPDL,LIN28A,SRSF2
GGAGUG	1719	SRSF2
GGAGUU	733,1551	SRSF2
GGAUGA	1056,1234,1293	G3BP2,SRSF1
GGAUGG	502,1084	G3BP2,HNRNPF,SRSF2,SRSF9
GGAUUA	784	G3BP2,HNRNPDL,ZCRB1
GGCACA	363	SRSF1
GGCAGA	1594	SRSF1
GGCCAA	643	SRSF2
GGCUAA	37	FMR1,NELFE
GGCUGC	1141	YTHDC1,SRSF2
GGCUUA	376,539	ZCRB1
GGCUUC	968	KHSRP
GGGAAA	1336,1402	ESRP2
GGGAAU	1393	ESRP2,HNRNPF,HNRNPH1,HNRNPH2,HNRNPH3,SRSF2
GGGACU	821	HNRNPA1
GGGAUG	1055,1292	HNRNPF
GGGGAA	1335	ESRP2,HNRNPF,HNRNPH1,HNRNPH2,SRSF1
GGGGAC	820	SFPQ,SRSF1
GGGGAG	1111	ESRP2,HNRNPF,HNRNPH1,HNRNPH2,HNRNPH3,SRSF1
GGGGGA	1334	HNRNPH2,SFPQ,SRSF1
GGGGGG	1333	DAZAP1,FMR1,FUS,HNRNPC,HNRNPF,HNRNPH1,HNRNPH2,HNRNPH3,HNRNPK,HNRNPM,HNRNPU,NOVA1,NOVA2,PCBP1,PCBP2,PTBP1,RBM5,SFPQ,SRSF1
GGGUGA	937,1005,1380	FUS,SRSF2,ZRANB2
GGGUGG	886	FUS,SRSF9
GGGUGU	346,890,930	FUS,HNRNPH1,HNRNPH2,HNRNPH3
GGUCAG	249	SRSF2
GGUCCC	1034	SRSF2
GGUCGG	1547	SRSF1
GGUCUC	924	NELFE
GGUGAC	506,629,938	SRSF1
GGUGAG	872,1006,1274,1381	SRSF2
GGUGGG	887	SRSF1
GGUGUG	891	CELF4
GGUGUU	347	CELF4
GGUUCC	1708	SRSF2
GGUUGG	143	SRSF2,ZNF638
GGUUGU	917	SRSF2,ZNF638
GUAACA	390	RBMX
GUAAGA	1244	SFPQ
GUACAG	569	ENOX1
GUAUCU	757	ELAVL4
GUCCAG	325	PUM1
GUCCCU	1035	SRSF2
GUCCUC	525	SRSF2
GUCGGA	1548	EIF4B
GUCUCG	925	MBNL1
GUCUGG	1270	SFPQ
GUGACA	630,1100,1215	SRSF1
GUGACG	939	SRSF1
GUGAGC	873,894	SRSF2
GUGAGG	1007,1382	CELF6
GUGCUA	1578	MBNL1
GUGCUC	88	MBNL1
GUGGGG	1331	CELF6
GUGGUC	975	SRSF2
GUGUGA	892	RBM24
GUGUGU	321	CELF1,CELF2,CELF4,CELF5,CSTF2,KHSRP,RBM24,TARDBP
GUGUUG	1303	CELF1,CELF4,CELF5,CELF6,CSTF2
GUUAAU	1682	SRSF2
GUUCAA	1362	SNRNP70
GUUCCA	1709	SRSF2
GUUCCC	1554	SRSF2
GUUCUG	66,330,768	SRSF2
GUUGGA	144	EIF4B
GUUGUG	918	CELF1,TARDBP
GUUGUU	63	CELF2,SRSF2,TARDBP,ZNF638
GUUUUC	736	ELAVL2,TIA1,TIAL1
GUUUUU	833	ELAVL2,TIA1,TIAL1
UAAAAA	40	KHDRBS1,PPIE
UAAAAG	1510	KHDRBS1
UAAAGG	352	SRSF5,ZRANB2
UAACCC	714,1497	PCBP2
UAACCU	118,720	QKI
UAAGAG	1245	SFPQ
UAAGGA	214	FMR1,SFPQ,ZFP36
UAAUAC	1684	YTHDC1
UAAUGC	793	YTHDC1
UACAAC	1441	SRSF3
UACAGA	570	SRSF5
UACAUU	578	RBM41
UACGCU	543	SRSF2
UAGUGU	319	SFPQ
UAUAAA	1118	PPIE
UAUCAA	1761	SRSF3
UAUCCA	1157	RBM6
UAUGGA	1347	FMR1
UAUUUA	439	ELAVL1,ELAVL2,ELAVL3,ELAVL4,HNRNPD,KHSRP,PPIE,ZFP36,ZFP36L2
UAUUUG	1692	ELAVL2
UCAACA	1227,1625	SRSF7
UCAACC	1586	SRSF6
UCACAA	986	SRSF3
UCACAC	1525	SRSF6
UCACCA	1078	SRSF2
UCACUC	284,982	SRSF6
UCAGAG	95	SRSF3
UCAGUA	1241	A1CF
UCAGUC	1634	NOVA1
UCAGUG	906,1097	SRSF2
UCAUAU	436	QKI
UCAUCA	92,979	SRSF3
UCAUCC	1040	SRSF3,SRSF6
UCAUCU	1459	SRSF3
UCAUUU	1065	ELAVL2
UCCAGA	1711	SRSF2
UCCAGG	1159	SRSF2
UCCAGU	294,326,671	SRSF2
UCCCAA	562,1408	HNRNPK
UCCCAU	1556	HNRNPK
UCCCCA	1043,1125	HNRNPK,PCBP1,PCBP2,SRSF2
UCCCCC	263	HNRNPK,PTBP1
UCCCCG	233	SRSF2
UCCCGA	1135	HNRNPK
UCCCGC	594	SRSF2
UCCCUC	290,1036	KHSRP
UCCUCA	526,903,1729	SRSF2
UCCUCC	260,1726	SRSF2,ZFP36
UCCUUU	340	TIA1,ZFP36
UCUAAU	791	ELAVL4,QKI
UCUAUC	1759	PTBP1
UCUCAC	1523	SRSF6
UCUCCA	1023,1638	SRSF3
UCUCCU	113	TIA1
UCUCUG	1462	NELFE,SRSF6
UCUGAC	683	HNRNPDL
UCUGCU	68,1222,1464,1481	MBNL1
UCUGGA	760	SFPQ
UCUGGU	1271	NELFE
UCUGUG	972	RC3H1
UCUUCA	1094	SRSF3,SRSF7
UCUUGU	1266	ZFP36
UCUUUU	47	ELAVL2,PTBP1,ZFP36
UGAAAA	334,445,1147	SRSF9
UGAACA	513	SRSF1,SRSF9
UGAAGA	169,676	SRSF1
UGAAGC	1260	SFPQ,SRSF1,SRSF9
UGAAGG	535,1398	SRSF1,SRSF9
UGACAA	1216,1321	FMR1,FXR2,SRSF9
UGACAG	130,631,685,1101	FMR1,FXR2,SRSF1,SRSF9
UGACGA	853	FXR2,SRSF1
UGACGG	780	FXR2
UGACUA	691	SRSF1
UGAGAA	196	SRSF9
UGAGAG	1431	SRSF7,SRSF9
UGAGCA	826,874,895	SRSF9
UGAGGA	1008	FMR1
UGAGGU	79	AGO1
UGAGUG	85	RBM24
UGAUGA	193,532,745	SRSF1
UGAUGC	1564,1748	SRSF1,SRSF2,SRSF9,YTHDC1
UGAUGG	520	SFPQ,SRSF1,SRSF9,SRSF2
UGAUGU	772	SFPQ
UGCACA	613	SNRPA
UGCAGU	796	SNRPB2,SRSF2
UGCCGU	637	SRSF2
UGCUGA	1144,1483,1561	SF1
UGCUGC	1751	MBNL1,SF1,YTHDC1
UGCUGU	1754	MBNL1,SRSF2,SSB
UGCUUC	70	KHSRP,MBNL1
UGCUUU	417	MBNL1
UGGAAA	146	SRSF1
UGGAAG	123	SFPQ
UGGAGA	370	LIN28A,SFPQ,SRSF1,SRSF2
UGGAGC	1349	SFPQ,SRSF1,SRSF9
UGGAGU	753,1718	FMR1,LIN28A,SRSF2
UGGGGA	819	ESRP2
UGGGGG	1332	HNRNPH1,HNRNPH2
UGGGGU	1003	HNRNPF,HNRNPH1,HNRNPH2
UGGGUG	345,885,889	HNRNPH1,HNRNPH2,HNRNPH3
UGGUGA	505,1273	FUS,SRSF1
UGGUUG	954	SFPQ
UGUCCA	324	PUM1
UGUCUC	111	MBNL1
UGUCUG	1269	CELF1
UGUGAG	893	CELF6
UGUGGG	920	CELF6,HNRNPF,HNRNPH1,HNRNPH2,HNRNPH3
UGUGGU	974	CELF6
UGUUCU	65,767	ZNF638
UGUUGG	1304	ZNF638
UGUUGU	62	CELF1,CELF2,ZNF638
UGUUUU	832	CSTF2,ELAVL1,SSB
UUAAUA	1683	PPIE
UUAAUU	426	A1CF,ELAVL2,PPIE,SFPQ,SRSF1
UUACUC	787	SRSF6
UUAGUG	318	SFPQ,SRSF2
UUAUAA	211	PPIE
UUAUUA	839	KHSRP,PPIE
UUCAAC	1585,1624	SRSF3
UUCAAG	430,1167,1363	SNRNP70,SRSF1
UUCACG	497	SRSF6
UUCAGA	739	ERI1
UUCAGU	1096	TIAL1
UUCAUC	1458	SRSF3
UUCCAG	670,1710	SRSF2
UUCCCA	1555	SRSF2
UUCUGU	971	RC3H1,SRSF2
UUGACA	312	SRSF1
UUGAUG	192	SFPQ,SRSF2
UUGCCA	463,957,1209	MBNL1
UUGCCC	703	MBNL1
UUGCCU	880	MBNL1
UUGCUU	416	MBNL1
UUGGAA	51,145	EIF4B
UUGGGU	344	HNRNPH1,HNRNPH2,HNRNPH3
UUGUGG	919	ZFP36
UUGUUC	64	TARDBP
UUUAUG	441	ELAVL2
UUUAUU	838	ELAVL1,ELAVL2,ELAVL3,ELAVL4,HNRNPA1,HNRNPD,KHSRP,PPIE,TIA1,TIAL1,ZFP36,ZFP36L2
UUUCAA	1584	SRSF1
UUUCAG	738	ERI1,TIAL1,SRSF6
UUUCCU	901	SNRPA
UUUCUU	422	ELAVL2,PTBP1,RBM20
UUUUAU	837	ELAVL2,ELAVL4,PPIE,TIA1,TIAL1
UUUUCA	737	TIAL1
UUUUCU	421	PTBP1,TIA1
UUUUGG	49,1068	TIA1
UUUUUA	836	ELAVL2,ELAVL4,HNRNPC,PPIE,TIA1,TIAL1
UUUUUC	420	ELAVL2,HNRNPC,PTBP1,RALY,TIA1,TIAL1,U2AF2
UUUUUU	834,835	CPEB2,CPEB4,DAZAP1,DDX19B,EIF4A3,ELAVL1,ELAVL2,ELAVL3,ELAVL4,FMR1,FUS,HNRNPA1,HNRNPC,HNRNPCL1,HNRNPK,HNRNPU,KHDRBS1,KHDRBS2,KHDRBS3,NOVA1,NOVA2,PCBP1,PCBP2,PPIE,PTBP1,RALY,SFPQ,SYNCRIP,TIA1,TIAL1,U2AF2

## Sheet: GRs sequences
Table showing the sequences extracted from the upstream and downstream genomic ranges (GR) of circALPK2.
See package vignettes for an explanation about the content of each column.
upstream GR	id	gene	transcript	strand	chrom	startGR	endGR	length	seq	type
	ALPK2:-:chr18:56247780:56246046	ALPK2	ENST00000361673.3	-	chr18	56247771	56247980	210	UUGCCUAGGAUUCUCAGCACUAGGGGCACCGGAGCCCAGAGGUCAGUUGCCUUUGGCCACAAACUCUUUUCCAGGGAGAUCACAGAUCUCCUUGAACAUGCAGUAAAAUGAUGGUCAUUUUCUCUGUGUGCCAUGGUGUGAAAAUGUUGGCAUGCAUGUCCAAAUGUGGCAAACUUAUCUAUAUAUUCUCUUCAUCCUAGCUGUACCAAA	ie
downstream GR	id	gene	transcript	strand	chrom	startGR	endGR	length	seq	type
	ALPK2:-:chr18:56247780:56246046	ALPK2	ENST00000361673.3	-	chr18	56245846	56246055	210	UCCUCCUCAGGUAAGACUUUUCUUUUAAAGAAAUUACGAGAUAAAAAGAACCGUGUGUGUGUGUGUGUGUGUGUGUGUGUGUGUGUGUGUCUCUUCCUUUACUUCACAUUCACAAUUGCUAUACCAUAAUGUAAAUCAAAAUAAGUUUCCCAACACCAUCAGGGUACUUGUGCAUGACAGCUGCUGCUGCUCGGAAGGAAAUCUGGUUUU	ie

## Sheet: motifs in GRs 
Table showing the the log2FC and the counts of the RBP motifs found in sequences extracted from the genomic ranges (GR) of circALPK2 (foreground) compared to the 1457 circRNAs (background).
See package vignettes for an explanation about the content of each column.
We normalized the number of RBP motifs by the total length of the target sequences
RBP	foreground	background	foregroundNorm	backgroundNorm	log2FC	motifF	motifB
DDX58	0	4	0.0047619	1.63415e-05	8.18686	GCGCGC	GCGCGC
RBM14	0	27	0.0047619	9.15122e-05	5.70143	CGCGCC,CGCGCG,CGCGGG,GCGCGC,GCGCGG	CGCGCC,CGCGCG,CGCGGG,GCGCGC,GCGCGG
SUPV3L1	0	30	0.0047619	0.000101317	5.55459	CCGCCC	CCGCCC
RBM25	0	41	0.0047619	0.000137268	5.11647	AUCGGG,CGGGCA,UCGGGC	AUCGGG,CGGGCA,UCGGGC
RBM24	35	2284	0.171429	0.00746805	4.52073	GUGUGA,GUGUGU,UGUGUG	AGAGUG,AGUGUG,GAGUGA,GAGUGG,GAGUGU,GUGUGA,GUGUGG,GUGUGU,UGAGUG,UGUGUG
CELF5	34	2286	0.166667	0.00747459	4.47883	GUGUGU,UGUGUG	GUGUGG,GUGUGU,GUGUUG,GUGUUU,UGUGUG,UGUGUU
CELF4	35	2605	0.171429	0.00851717	4.33109	GGUGUG,GUGUGU,UGUGUG	GGUGUG,GGUGUU,GUGUGG,GUGUGU,GUGUUG,GUGUUU,UGUGUG,UGUGUU
RBM8A	0	82	0.0047619	0.000271268	4.13375	ACGCGC,AUGCGC,CGCGCC,CGCGCG,CGCGCU,GCGCGC,GUGCGC,UGCGCC,UGCGCG,UGCGCU	ACGCGC,AUGCGC,CGCGCC,CGCGCG,CGCGCU,GCGCGC,GUGCGC,UGCGCC,UGCGCG,UGCGCU
PPRC1	0	85	0.0047619	0.000281073	4.08252	CCGCGC,CGCGCC,CGCGCG,CGGCGC,GCGCGC,GGCGCC,GGCGCG,GGGCGC	CCGCGC,CGCGCC,CGCGCG,CGGCGC,GCGCGC,GGCGCC,GGCGCG,GGGCGC
TARDBP	35	3805	0.171429	0.0124391	3.78465	GUGUGU,UGUGUG,UUGUGC	GAAUGA,GAAUGG,GAAUGU,GUGAAU,GUGUGU,GUUGUG,GUUGUU,GUUUUG,UGAAUG,UGUGUG,UUGUGC,UUGUUC,UUUUGC
ANKHD1	0	105	0.0047619	0.000346439	3.78086	AGACGA,AGACGU,GACGAA,GACGAU,GACGUA,GACGUU	AGACGA,AGACGU,GACGAA,GACGAU,GACGUA,GACGUU
CELF2	34	3726	0.166667	0.0121809	3.77427	GUGUGU,UGUGUG	AUGUGU,GUAUGU,GUCUGU,GUGUGU,GUUGUU,UAUGUG,UAUGUU,UGUGUG,UGUUGU,UUGUGU
FXR1	1	213	0.00952381	0.000699415	3.76732	AUGACA	ACGACA,ACGACG,AUGACA,AUGACG
IFIH1	0	109	0.0047619	0.000359512	3.72743	CCGCGG,CGCGGA,GCCGCG,GCGGAU,GGCCCU,GGCCGC,GGGCCG	CCGCGG,CGCGGA,GCCGCG,GCGGAU,GGCCCU,GGCCGC,GGGCCG
ESRP1	0	110	0.0047619	0.000362781	3.71437	AGGGAU	AGGGAU
CELF1	34	3993	0.166667	0.0130536	3.67445	GUGUGU,UGUGUG	CUGUCU,GUGUGU,GUGUUG,GUUGUG,GUUUGU,UGUCUG,UGUGUG,UGUGUU,UGUUGU,UGUUUG,UUGUGU
RBFOX2	2	358	0.0142857	0.00117332	3.60591	UGCAUG	UGACUG,UGCAUG
ZC3H10	0	121	0.0047619	0.000398732	3.57805	CAGCGA,CAGCGC,CCAGCG,CGAGCG,GAGCGA,GAGCGC,GCAGCG,GGAGCG	CAGCGA,CAGCGC,CCAGCG,CGAGCG,GAGCGA,GAGCGC,GCAGCG,GGAGCG
CSTF2	34	4312	0.166667	0.0140962	3.56359	GUGUGU,UGUGUG	GUGUGU,GUGUUG,GUGUUU,GUUUUG,UGUGUG,UGUGUU,UGUUUG,UGUUUU
CNOT4	0	124	0.0047619	0.000408537	3.543	GACAGA	GACAGA
OAS1	0	126	0.0047619	0.000415073	3.5201	GCAUAA	GCAUAA
NXF1	0	129	0.0047619	0.000424878	3.48642	AACCUG	AACCUG
HNRNPM	2	430	0.0142857	0.00140863	3.3422	AAGGAA,GAAGGA	AAGGAA,GAAGGA,GGGGGG
RBFOX1	5	916	0.0285714	0.00299703	3.25297	GCAUGA,GCAUGC,GCAUGU,UGCAUG	AGCAUG,GCAUGA,GCAUGC,GCAUGU,UGACUG,UGCAUG
CELF6	17	2838	0.0857143	0.00927869	3.20754	UGUGUG	GUGAGG,GUGAUG,GUGGGG,GUGGUG,GUGUGG,GUGUUG,UGUGAG,UGUGAU,UGUGGG,UGUGGU,UGUGUG,UGUGUU
RBMY1A1	0	195	0.0047619	0.000640586	2.89408	ACAAGA,CAAGAC	ACAAGA,CAAGAC
SRSF11	0	219	0.0047619	0.000719025	2.72743	AAGAAG	AAGAAG
EIF4B	2	701	0.0142857	0.00229434	2.63842	CUCGGA,UCGGAA	CUCGGA,CUUGGA,GUCGGA,GUUGGA,UCGGAA,UCGGAC,UUGGAA,UUGGAC
IGF2BP1	0	272	0.0047619	0.000892244	2.41603	AAGCAC,ACCCGU,AGCACC,CACCCG,CCCGUU,GCACCC	AAGCAC,ACCCGU,AGCACC,CACCCG,CCCGUU,GCACCC
PTBP2	0	282	0.0047619	0.000924927	2.36413	CUCUCU	CUCUCU
PABPN1	1	661	0.00952381	0.00216361	2.1381	AAAAGA	AAAAGA,AGAAGA
HNRNPA3	1	675	0.00952381	0.00220937	2.10791	GGAGCC	AAGGAG,AGGAGC,CAAGGA,CCAAGG,GCCAAG,GGAGCC
RBM42	0	363	0.0047619	0.00118966	2.00099	AACUAA,AACUAC,ACUAAG,ACUACG	AACUAA,AACUAC,ACUAAG,ACUACG
HNRNPA1L2	0	385	0.0047619	0.00126156	1.91633	AUAGGG,GUAGGG,UAGGGA,UAGGGU,UUAGGG	AUAGGG,GUAGGG,UAGGGA,UAGGGU,UUAGGG
AKAP1	2	1249	0.0142857	0.00408537	1.80604	AUAUAU,UAUAUA	AUAUAU,UAUAUA
NELFE	4	2206	0.0238095	0.00721313	1.72284	CUGGUU,GUCUCU,UCUCUG,UCUGGU	CUCUCU,CUCUGG,CUGGCU,CUGGUU,GCUAAC,GGCUAA,GGUCUC,GGUUAG,GUCUCU,UCUCUC,UCUCUG,UCUGGC,UCUGGU,UGGCUA,UGGUUA
TRA2B	8	4031	0.0428571	0.0131778	1.70143	AAAGAA,AAGAAC,AAGGAA,AAUAAG,AGGAAA,GAAGGA,GGAAGG	AAAGAA,AAGAAC,AAGAAG,AAGAAU,AAGGAA,AAUAAG,AGAAGA,AGAAGG,AGGAAA,AGGAAG,AUAAGA,GAAAGA,GAAGAA,GAAGGA,GAAUUA,GGAAGG,UAAGAA
RBMX	7	3626	0.0380952	0.0118541	1.68422	AAGGAA,ACCAAA,AUCAAA,GAAGGA,GGAAGG,UAAGAC,UCAAAA	AAGAAG,AAGGAA,AAGUAA,AAGUGU,ACCAAA,AGAAGG,AGGAAG,AGUAAC,AGUGUU,AUCAAA,AUCCCA,AUCCCC,GAAGGA,GGAAGG,GUAACA,UAACAA,UAAGAC,UCAAAA
HNRNPLL	3	1953	0.0190476	0.00638625	1.57657	ACAAAC,ACACCA,GCAAAC	ACAAAC,ACACAC,ACACCA,ACAUAC,ACCACA,ACCGCA,ACGACA,ACUGCA,AGACGA,CAAACA,CACACA,CACACC,CACCAC,CACCGC,CACUGC,CAGACG,CAUACA,GACGAC,GCAAAC,GCACAC,GCAUAC
SNRNP70	1	996	0.00952381	0.00325849	1.54734	AAUCAA	AAUCAA,AUCAAG,AUUCAA,GAUCAA,GUUCAA,UUCAAG
RBM6	0	500	0.0047619	0.00163742	1.54012	AAUCCA,AUCCAA,AUCCAG,CAUCCA,UAUCCA	AAUCCA,AUCCAA,AUCCAG,CAUCCA,UAUCCA
MBNL1	14	7667	0.0714286	0.0250613	1.51104	CUGCUC,CUGCUG,CUUGUG,GCUGCU,UGCUGC,UGUCUC,UUGCCU,UUGCUA,UUGUGC	ACGCUA,ACGCUC,ACGCUG,ACGCUU,AUGCCA,AUGCCC,AUGCCG,AUGCUC,AUGCUU,CCCGCU,CCGCUA,CCGCUC,CCGCUG,CCGCUU,CCUGCU,CGCUGC,CGCUGU,CGCUUC,CGCUUG,CGCUUU,CUCGCU,CUGCCA,CUGCCC,CUGCCG,CUGCCU,CUGCGG,CUGCUA,CUGCUC,CUGCUG,CUGCUU,CUUGCU,CUUGUG,GCGCUC,GCGCUG,GCGCUU,GCUGCG,GCUGCU,GCUUGC,GCUUGU,GCUUUU,GGCUUU,GUCUCG,GUGCUA,GUGCUC,GUGCUG,GUGCUU,UCCGCU,UCGCUA,UCGCUC,UCGCUG,UCGCUU,UCUCGC,UCUGCU,UGCGGC,UGCUGC,UGCUGU,UGCUUC,…
KHSRP	39	20747	0.190476	0.0678106	1.49003	CUCCUU,CUGUGU,GUGUGU,UAUAUU,UGCAUG,UGUGUG	ACCCUC,ACCUUC,AGCCUC,AGCUUC,AUAUUU,AUGUAU,AUGUGU,AUUAUU,AUUUAU,AUUUUA,CACCCU,CACCUU,CAGCCU,CAGCUU,CCCCCU,CCCCUC,CCCCUU,CCCUCC,CCCUUC,CCGCCU,CCGCUU,CCUUCC,CGCCCU,CGCCUC,CGCCUU,CGCUUC,CGGCCU,CGGCUU,CUCCCU,CUCCUU,CUGCCU,CUGCUU,CUGUAU,CUGUGU,GCCCUC,GCCUCC,GCCUUC,GCUUCC,GGCCUC,GGCUUC,GUAUAU,GUAUGU,GUGUAU,GUGUGU,UAGGUA,UAGGUU,UAGUAU,UAUAUU,UAUUAU,UAUUUA,UAUUUU,UCCCUC,UCCUUC,UGCAUG,UGCCUC,UGCUUC,UGUAUA,…
SNRPB2	1	1046	0.00952381	0.0034219	1.47674	UGCAGU	AUUGCA,GUAUUG,UAUUGC,UGCAGU,UUGCAG
NONO	0	566	0.0047619	0.00185312	1.36158	AGAGGA,AGGAAC,GAGAGG,GAGGAA	AGAGGA,AGGAAC,GAGAGG,GAGGAA
PABPC5	3	2292	0.0190476	0.0074942	1.34576	AGAAAU,GAAAAU,GAAAUU	AGAAAA,AGAAAG,AGAAAU,GAAAAU,GAAAGU,GAAAUU
RBMS1	1	1148	0.00952381	0.00375527	1.34262	UAUAUA	AUAUAC,AUAUAG,GAUAUA,UAUAUA
YTHDC1	4	2941	0.0238095	0.00961532	1.30813	GCAUGC,GGGUAC,UGCUGC	GAAUAC,GAAUGC,GACUAC,GACUGC,GAGUAC,GAGUGC,GCAUAC,GCAUGC,GCCUAC,GCCUGC,GCGUAC,GCGUGC,GGAUAC,GGAUGC,GGCUAC,GGCUGC,GGGUAC,GGGUGC,UAAUAC,UAAUGC,UACUAC,UACUGC,UAGUAC,UAGUGC,UCAUAC,UCAUGC,UCCUAC,UCCUGC,UCGUAC,UCGUGC,UGAUAC,UGAUGC,UGCUAC,UGCUGC,UGGUAC,UGGUGC
SRSF7	11	7486	0.0571429	0.0244697	1.22358	AAUGAU,ACGAGA,AGAUCA,AGAUCU,CGAGAU,CUCUUC,CUUCAC,GAGAUC,GGAAGG,UCUUCA	AAAGGA,AAGAAG,AAGGAC,AAGGCG,AAUGAU,ACGAAU,ACGACG,ACGAGA,ACGAUA,ACGAUU,ACUACG,ACUAGA,AGAAGA,AGACGA,AGACUA,AGAGAA,AGAGAC,AGAGAG,AGAGAU,AGAGGA,AGAUCA,AGAUCU,AGGAAG,AGGACA,AGGCGA,AUAGAA,AUAGAC,AUUGAC,AUUGAU,CAGAGA,CCGAGA,CGAAUG,CGACGA,CGAGAC,CGAGAG,CGAGAU,CGAUAG,CGAUUG,CUACGA,CUAGAG,CUCUUC,CUGAGA,CUUCAC,GAAGAA,GAAGGC,GAAUGA,GACAAA,GACGAC,GACGAG,GACGAU,GACUAC,GAGACU,GAGAGA,GAGAUC,GAGGAA,GAUAGA,GAUUGA,…
G3BP2	1	1247	0.00952381	0.00407883	1.22338	AGGAUU	AGGAUA,AGGAUG,AGGAUU,GGAUAA,GGAUAG,GGAUGA,GGAUGG,GGAUUA,GGAUUG
RBM5	9	6361	0.047619	0.0207929	1.19545	AAGGAA,AGGGAG,AGGGUA,AGGUAA,CUCUUC,GAAGGA,UUCUCU	AAAAAA,AAGGAA,AAGGAG,AAGGGG,AAGGUA,AAGGUG,AGGGAA,AGGGAG,AGGGUA,AGGGUG,AGGUAA,CAAGGA,CAAGGG,CCCCCC,CUCUUC,CUUCUC,GAAGGA,GAAGGG,GAAGGU,GAGGGA,GAGGGU,GGGGGG,GGUGGU,UCUUCU,UUCUCU
SRP14	0	670	0.0047619	0.00219303	1.11862	CCUGUA,CGCCUG,CUGUAG,GCCUGU	CCUGUA,CGCCUG,CUGUAG,GCCUGU
RBM4	3	2734	0.0190476	0.00893878	1.09146	CUCUUU,CUUCCU,UUCCUU	CCUCUU,CCUUCC,CCUUCU,CGCGCG,CGCGGG,CGCGGU,CUCUUU,CUUCCU,CUUCUU,GCGCGA,GCGCGC,GCGCGG,UCCUUC,UUCCUU,UUCUUG
SRSF3	14	10677	0.0714286	0.0348988	1.03332	ACAUUC,ACUUCA,CAUUCA,CUCUUC,CUUCAC,CUUCAU,UACUUC,UCACAA,UCAUCC,UCUUCA,UCUUCC,UUACGA,UUCAUC	AACGAC,AACGAU,AACUUU,ACAUCA,ACAUCG,ACAUUC,ACCACC,ACGACG,ACGACU,ACGAUC,ACGAUU,ACUACA,ACUACG,ACUUCA,ACUUCG,ACUUCU,ACUUUA,AGAGAU,AUCAAC,AUCAUC,AUCGAC,AUCGAU,AUCGCU,AUCGUU,AUCUUC,AUUCAU,CAACGA,CACAAC,CACAUC,CACCAC,CACUAC,CACUUC,CAGAGA,CAUCAA,CAUCAC,CAUCAU,CAUCGA,CAUCGC,CAUCGU,CAUUCA,CCACCA,CCUCGU,CCUCUU,CGCUUC,CUACAA,CUACAC,CUACAG,CUACGA,CUCCAA,CUCGUC,CUCUUC,CUUCAA,CUUCAC,CUUCAG,CUUCAU,CUUCGA,CUUCUU,…
FXR2	1	1462	0.00952381	0.00478151	0.994071	UGACAG	AGACAA,AGACAG,AGACGA,AGACGG,GACAAA,GACAAG,GACAGA,GACAGG,GACGAA,GACGAG,GACGGA,GACGGG,GGACAA,GGACAG,GGACGA,GGACGG,UGACAA,UGACAG,UGACGA,UGACGG
ACO1	0	735	0.0047619	0.00240546	0.985223	CAGUGA,CAGUGC,CAGUGG,CAGUGU	CAGUGA,CAGUGC,CAGUGG,CAGUGU
TRA2A	3	3007	0.0190476	0.00983103	0.954196	AAAGAA,AAGAAA	AAAGAA,AAGAAA,AAGAAG,AAGAGG,AGAAAG,AGAAGA,AGAGGA,AGGAAG,GAAAGA,GAAGAA,GAAGAG,GAGGAA
RBMS3	3	3037	0.0190476	0.00992908	0.939879	AUAUAU,CUAUAU,UAUAUA	AAUAUA,AUAUAG,AUAUAU,CAUAUA,CUAUAG,CUAUAU,UAUAGA,UAUAGC,UAUAUA,UAUAUC
IGF2BP2	8	6963	0.0428571	0.0227604	0.91301	AAACUC,AAAUCA,ACAAAC,ACAUUC,CAACAC,CAUUCA,GAAAUC,GCAAAC	AAAAAC,AAAACA,AAAAUC,AAACAC,AAACUC,AAAUAC,AAAUCA,AAAUUC,AACACA,AACUCA,AAUACA,AAUUCA,ACAAAC,ACAAUC,ACACAC,ACACUC,ACAUAC,ACAUUC,CAAAAC,CAAACA,CAAAUC,CAACAC,CAACUC,CAAUAC,CAAUCA,CAAUUC,CACACA,CACUCA,CAUACA,CAUUCA,CCAAAC,CCAAUC,CCACAC,CCACUC,CCAUAC,CCAUUC,GAAAAC,GAAAUC,GAACAC,GAACUC,GAAUAC,GAAUUC,GCAAAC,GCAAUC,GCACAC,GCACUC,GCAUAC,GCAUUC
RC3H1	1	1566	0.00952381	0.00512142	0.894996	UCUGUG	CCCUUC,CCUUCU,CUUCUG,UCCCUU,UCUGUG,UUCUGU
IGF2BP3	5	4757	0.0285714	0.0155505	0.877608	AAACUC,AAAUCA,ACAAAC,ACAUUC,CAUUCA	AAAAAC,AAAACA,AAAAUC,AAACAC,AAACUC,AAAUAC,AAAUCA,AAAUUC,AACACA,AACUCA,AAUACA,AAUUCA,ACAAAC,ACAAUC,ACACAC,ACACUC,ACAUAC,ACAUUC,CAAACA,CAAUCA,CACACA,CACUCA,CAUACA,CAUUCA
RBM20	4	3997	0.0238095	0.0130666	0.865651	AUUCUC,UUUCUC,UUUCUU	AUUCUA,AUUCUC,AUUCUU,CUUCUA,CUUCUC,CUUCUU,UUUCUA,UUUCUC,UUUCUU
LIN28A	1	1604	0.00952381	0.00524561	0.860428	GGAGAU	AGGAGA,AGGAGU,CGGAGA,CGGAGG,CGGAGU,GGAGAA,GGAGAU,GGAGGA,GGAGGG,GGAGUA,UGGAGA,UGGAGG,UGGAGU
YBX2	0	821	0.0047619	0.00268654	0.825791	AACAAC,AACAUC,ACAACA,ACAACG,ACAACU,ACAUCA,ACAUCG,ACAUCU	AACAAC,AACAUC,ACAACA,ACAACG,ACAACU,ACAUCA,ACAUCG,ACAUCU
AGO1	0	841	0.0047619	0.0027519	0.791109	AGGUAG,GAGGUA,GGUAGU,GUAGUA,UGAGGU	AGGUAG,GAGGUA,GGUAGU,GUAGUA,UGAGGU
SF1	4	4256	0.0238095	0.0139131	0.775092	ACUUAU,CACAGA,UGCUGC	ACAGAC,ACAGUC,ACCGAC,ACGAAC,ACUAAC,ACUAAG,ACUAAU,ACUAGC,ACUGAC,ACUUAU,AGUAAC,AGUAAG,AUACUA,AUUAAC,CACAGA,CACCGA,CACUGA,CAGUCA,CGCUGA,CUAACA,GACUAA,GCUAAC,GCUGAC,GCUGCC,UAACAA,UACGAA,UACUAA,UACUAG,UACUGA,UAGUAA,UAUACU,UGCUAA,UGCUGA,UGCUGC
ERI1	0	853	0.0047619	0.00279112	0.770693	UUCAGA,UUUCAG	UUCAGA,UUUCAG
RBM41	2	2609	0.0142857	0.00853025	0.743914	UACUUG,UUACUU	AUACAU,AUACUU,UACAUG,UACAUU,UACUUG,UACUUU,UUACAU,UUACUU
TUT1	0	874	0.0047619	0.00285976	0.735646	AAAUAC,AAUACU,AGAUAC,CAAUAC,CGAUAC,GAUACU	AAAUAC,AAUACU,AGAUAC,CAAUAC,CGAUAC,GAUACU
YBX1	2	2652	0.0142857	0.00867078	0.720339	ACACCA,CCACAA	AACAUC,AACCAC,ACACCA,ACAUCA,ACAUCG,ACAUCU,ACCACA,ACCACC,AUCAUC,CAACCA,CACACC,CACCAC,CAGCAA,CAUCAU,CAUCGC,CAUCUG,CCACAA,CCACAC,CCACCA,CCAGCA,CCCUGC,CCUGCG,CUGCGG,GAUCUG,GCCUGC,GGUCUG,GUCUGC,UCCAGC,UGCGGU
MATR3	0	905	0.0047619	0.00296107	0.685418	AAUCUU,AUCUUA,AUCUUG,CAUCUU	AAUCUU,AUCUUA,AUCUUG,CAUCUU
RBM46	4	4565	0.0238095	0.014923	0.673998	AAUCAA,AAUGAU,AUCAAA,AUGAUG	AAUCAA,AAUCAU,AAUGAA,AAUGAU,AUCAAA,AUCAAG,AUCAAU,AUCAUA,AUCAUG,AUCAUU,AUGAAA,AUGAAG,AUGAAU,AUGAUA,AUGAUG,AUGAUU,GAUCAA,GAUCAU,GAUGAA,GAUGAU
SRSF9	9	9151	0.047619	0.0299114	0.670842	AGGAAA,AUGACA,GAAGGA,GGAAGG,GGAGCC,UGAAAA,UGAACA,UGACAG,UGAUGG	AGGAAA,AGGAAC,AGGACA,AGGACC,AGGAGA,AGGAGC,AUGAAA,AUGAAC,AUGACA,AUGACC,AUGAGA,AUGAGC,CUGGAU,GAAGCA,GAAGCC,GAAGGA,GAAGGC,GAUGCA,GAUGCC,GAUGGA,GAUGGC,GGAAAA,GGAAAG,GGAACA,GGAACG,GGAAGC,GGAAGG,GGACAA,GGACAG,GGACCA,GGACCG,GGAGAA,GGAGAG,GGAGCA,GGAGCC,GGAGCG,GGAGGA,GGAGGC,GGAUGC,GGAUGG,GGGAGC,GGGAGG,GGGUGC,GGGUGG,GGUGCA,GGUGCC,GGUGGA,GGUGGC,UGAAAA,UGAAAG,UGAACA,UGAACG,UGAAGC,UGAAGG,UGACAA,UGACAG,UGACCA,…
PUM2	3	3666	0.0190476	0.0119848	0.668401	GUAAAU,UAUAUA,UGUAAA	GUAAAU,GUACAU,GUAGAU,GUAUAU,UAAAUA,UACAUA,UACAUC,UAGAUA,UAUAUA,UGUAAA,UGUACA,UGUAGA,UGUAUA
HNRNPH3	3	3705	0.0190476	0.0121123	0.653138	AAUGUG,AUGUGG,GGAAGG	AAGGGA,AAGGUG,AAUGUG,AGGGAA,AGGGGA,AUCGGG,AUGUGG,AUUGGG,CGAGGG,CGGGCG,CGGGGG,GAAGGG,GAAUGU,GAGGGG,GGAAGG,GGAAUG,GGAGGA,GGAGGG,GGGAAG,GGGAAU,GGGAGG,GGGCGU,GGGCUG,GGGGAG,GGGGCU,GGGGGC,GGGGGG,GGGUCG,GGGUGU,GGUCGA,GUCGAG,UCGAGG,UCGGGC,UGGGUG,UGUGGG,UUGGGU
HNRNPA0	0	932	0.0047619	0.00304932	0.643052	AAUUUA,AGAUAU,AGUAGG	AAUUUA,AGAUAU,AGUAGG
HNRNPDL	8	8594	0.0428571	0.028091	0.609428	ACACCA,ACUAGG,AUACCA,CACUAG,CCUUUA,CUAGCU,CUAGGA,GCACUA	AACAGC,AACCUU,AACUAA,AAUACC,AAUUUA,ACACCA,ACAGCA,ACAUUA,ACCACG,ACCAGA,ACCUUG,ACUAAC,ACUAAG,ACUAGA,ACUAGC,ACUAGG,ACUGCA,ACUUUA,AGAUAU,AGUAGC,AGUAGG,AUACCA,AUCUGA,AUGCGC,AUUAGC,AUUAGG,CACCAG,CACGCA,CACUAG,CAUUAG,CCACGC,CCAGAC,CCUUGC,CCUUUA,CGAGCA,CUAACA,CUAACU,CUAAGC,CUAAGU,CUAGAG,CUAGAU,CUAGCA,CUAGCC,CUAGCG,CUAGCU,CUAGGA,CUAGGC,CUAGUA,CUUGCC,CUUUAA,CUUUAG,GAACUA,GACUAG,GAGUAG,GAUUAG,GCACUA,GCGAGC,…
RBM3	1	2016	0.00952381	0.00659215	0.53079	AAGACU	AAAACG,AAAACU,AAACGA,AAACUA,AAGACG,AAGACU,AAUACG,AAUACU,AGACGA,AGACUA,AUACGA,AUACUA,GAAACG,GAAACU,GAGACG,GAGACU,GAUACG,GAUACU
SRSF1	37	38750	0.180952	0.12665	0.514767	AAAAGA,AAAGAA,AAGAAC,ACCGGA,AGAGGU,AGGAAA,AGGUAA,AUGACA,AUUACG,CACAGA,CACCGG,CAGAGG,CAUGGU,CCAGGG,CCAUGG,CCGGAG,CCUAGG,CGGAAG,CGGAGC,CUAGGG,CUCAGG,CUCGGA,GAAGGA,GAUGGU,GCACCG,GCUCGG,GGAAGG,GGAGAU,GGAGCC,GGAUUC,GGGGCA,GGGUAC,UCAGGU,UGAACA,UGACAG,UGAUGG	AAAAGA,AAAGAA,AAAGAC,AAAGAG,AAAGGA,AACACG,AACAGC,AACCGG,AAGAAC,AAGAAG,AAGACC,AAGAGA,AAGAGC,AAGAGG,AAGGAC,AAGGAG,AAGGCG,AAGGUG,AAUGAC,AAUUUC,ACAAGG,ACACGA,ACACGU,ACAGAA,ACAGAG,ACAGCA,ACAGCG,ACAGGA,ACAGGG,ACAGGU,ACAGUG,ACCCGA,ACCCGG,ACCCGU,ACCGGA,ACCGGU,ACGAAC,ACGAAG,ACGAAU,ACGACG,ACGCGA,ACGCGC,ACGCUC,ACGGAA,ACGGAC,ACUGAG,ACUGGA,AGAAGA,AGAAGG,AGACAA,AGACAG,AGACGA,AGACGU,AGAGAA,AGAGAC,AGAGCA,AGAGGA,…
SRSF6	10	11324	0.052381	0.0370134	0.500993	CAGCAC,CAUCCU,CCUCAG,CUCAGG,CUUCAC,UCACAG,UCAUCC,UCUCAG,UCUCUG,UUUCUC	AACCUG,AAGAAG,ACCGGG,ACCGUC,ACCUGG,AGAAGA,AGCACC,AGCGGA,AGGAAG,AUCAAC,AUCCUG,AUCGUA,CAACCU,CACACG,CACAGG,CACCUG,CACGGA,CACUCG,CACUGG,CAGCAC,CAUCCU,CCACAC,CCACAG,CCACUC,CCACUG,CCCGGC,CCUCAC,CCUCAG,CCUCUC,CCUCUG,CCUGGC,CGCGUC,CUACAC,CUACAG,CUACUC,CUACUG,CUCACG,CUCAGG,CUCAUC,CUCUCG,CUCUGG,CUUCAC,CUUCAG,CUUCUC,CUUCUG,GAAGAA,GACGUC,GAGGAA,GAUCAA,GCACCU,GCAGCA,GCCGGA,GCCGUC,GCUCAU,GGAAGA,UACACG,UACAGG,…
ESRP2	0	1033	0.0047619	0.00337942	0.494765	GGGAAA,GGGAAG,GGGAAU,GGGGAA,GGGGAG,GGGGAU,UGGGAA,UGGGGA	GGGAAA,GGGAAG,GGGAAU,GGGGAA,GGGGAG,GGGGAU,UGGGAA,UGGGGA
ZNF638	1	2087	0.00952381	0.0068242	0.480879	UGUUGG	CGUUCG,CGUUCU,CGUUGG,CGUUGU,GGUUCG,GGUUCU,GGUUGG,GGUUGU,GUUCGU,GUUCUU,GUUGGU,GUUGUU,UGUUCG,UGUUCU,UGUUGG,UGUUGU
HNRNPH2	3	4392	0.0190476	0.0143576	0.407794	AAUGUG,AUGUGG,GGAAGG	AAGGCG,AAGGGA,AAGGGG,AAGGUG,AAUGUG,AGGCGA,AGGGAA,AGGGGA,AUCGGG,AUGUGG,AUUGGG,CAGGAC,CGAGGG,CGGGCG,CGGGGG,CUGGGG,GAAGGG,GAAUGU,GAGGGG,GGAAGG,GGAAUG,GGAGGA,GGAGGG,GGCGAA,GGGAAG,GGGAAU,GGGAGG,GGGCGU,GGGCUG,GGGGAA,GGGGAG,GGGGCU,GGGGGA,GGGGGC,GGGGGG,GGGUCG,GGGUGU,GGUCGA,GUCGAG,UCGAGG,UCGGGC,UGGGGG,UGGGGU,UGGGUG,UGUGGG,UUGGGU
HNRNPA2B1	4	5639	0.0238095	0.0184332	0.369234	AAGGAA,AGGGGC,GAAGGA,GGAGCC	AAGAAG,AAGGAA,AAGGAG,AAGGGG,AAUUUA,ACUAGA,AGAAGC,AGACUA,AGAUAU,AGGAAC,AGGAGC,AGGGGC,AGUAGG,AUAGCA,AUAGGG,AUUUAA,CAAGAA,CAAGGA,CAAGGG,CCAAGA,CCAAGG,CGAAGG,CUAGAC,GAAGCC,GAAGGA,GACUAG,GCCAAG,GCGAAG,GGAACC,GGAGCC,GGGGCC,GUAGGG,UAGACA,UAGACU,UAGGGA,UAGGGU,UUAGGG,UUUAUA
SAMD4A	0	1150	0.0047619	0.00376181	0.340113	CGGGAA,CGGGAC,CGGGCA,CGGGCC,CGGGUA,CGGGUC,CUGGAA,CUGGAC,CUGGCA,CUGGCC,CUGGUA,CUGGUC,GCGGGA,GCGGGC,GCGGGU,GCUGGA,GCUGGC,GCUGGU	CGGGAA,CGGGAC,CGGGCA,CGGGCC,CGGGUA,CGGGUC,CUGGAA,CUGGAC,CUGGCA,CUGGCC,CUGGUA,CUGGUC,GCGGGA,GCGGGC,GCGGGU,GCUGGA,GCUGGC,GCUGGU
PTBP1	24	28859	0.119048	0.094323	0.335858	ACUUUU,AGCUGU,AUUUUC,CUCUUC,CUCUUU,CUUCCU,CUUUUC,UAGCUG,UCUCUU,UCUUUU,UUACUU,UUCCUU,UUCUCU,UUCUUU,UUUCCC,UUUCUU,UUUUCC,UUUUCU	ACUUUC,ACUUUU,AGCUGU,AUCUUC,AUUUUC,AUUUUU,CAUCUU,CCAUCU,CCCCCC,CCUCUU,CCUUCC,CCUUUC,CCUUUU,CUAUCU,CUCCAU,CUCCCC,CUCUCU,CUCUUA,CUCUUC,CUCUUG,CUCUUU,CUUCCU,CUUCUC,CUUCUU,CUUUCC,CUUUCU,CUUUUC,CUUUUU,GCUCCC,GCUGUG,GGCUCC,GGGGGG,GUCUUA,GUCUUU,UACUUU,UAGCUG,UAUUUU,UCCAUC,UCCCCC,UCCUCU,UCUAUC,UCUCUC,UCUCUU,UCUUCU,UCUUUC,UCUUUU,UUACUU,UUAUUU,UUCCCC,UUCCUU,UUCUCU,UUCUUC,UUCUUG,UUCUUU,UUUCCC,UUUCUU,UUUUCC,…
HNRNPAB	0	1175	0.0047619	0.00384351	0.309113	AAAGAC,AAGACA,ACAAAG,AGACAA,AUAGCA,CAAAGA,GACAAA	AAAGAC,AAGACA,ACAAAG,AGACAA,AUAGCA,CAAAGA,GACAAA
SRSF10	5	7106	0.0285714	0.0232278	0.298723	AAAAGA,AAAGAA,AAGAAA,AAGGAA	AAAAGA,AAAGAA,AAAGAC,AAAGAG,AAAGGA,AAAGGG,AAGAAA,AAGAAG,AAGACA,AAGAGA,AAGAGG,AAGGAA,AAGGAG,AAGGGA,AAGGGG,ACAAAG,AGACAA,AGAGAA,AGAGAC,AGAGAG,AGAGGA,AGAGGG,CAAAGA,GAAAGA,GACAAA,GAGAAA,GAGAAC,GAGAAG,GAGACA,GAGACC,GAGACG,GAGAGA,GAGAGC,GAGAGG,GAGGAA,GAGGAG,GAGGGA,GAGGGG
HNRNPH1	3	4834	0.0190476	0.0158022	0.269485	AAUGUG,AUGUGG,GGAAGG	AAGGCG,AAGGGA,AAGGGG,AAGGUG,AAUGUG,AGGAAG,AGGCGA,AGGGAA,AGGGGA,AUCGGG,AUGUGG,AUUGGG,CAGGAC,CGAGGG,CGGGCG,CGGGGG,CUGGGG,GAAGGG,GAAGGU,GAAUGU,GAGGAA,GAGGGG,GGAAGG,GGAAUG,GGAGGA,GGAGGG,GGCGAA,GGGAAG,GGGAAU,GGGAGG,GGGCGU,GGGCUG,GGGGAA,GGGGAG,GGGGCU,GGGGGC,GGGGGG,GGGUCG,GGGUGU,GGUCGA,GUCGAG,UCGAGG,UCGGGC,UGGGGG,UGGGGU,UGGGUG,UGUGGG,UUGGGU
RBM28	0	1209	0.0047619	0.00395464	0.267994	AGUAGA,AGUAGG,AGUAGU,GAGUAG,GUGUAG,UGUAGA,UGUAGG,UGUAGU	AGUAGA,AGUAGG,AGUAGU,GAGUAG,GUGUAG,UGUAGA,UGUAGG,UGUAGU
SRSF4	0	1209	0.0047619	0.00395464	0.267994	AAGAAG,AGAAGA,AGGAAG,GAAGAA,GAGGAA,GGAAGA	AAGAAG,AGAAGA,AGGAAG,GAAGAA,GAGGAA,GGAAGA
PABPC3	0	1218	0.0047619	0.00398405	0.257303	AAAAAC,AAAACA,AAAACC,GAAAAC	AAAAAC,AAAACA,AAAACC,GAAAAC
HNRNPF	3	4900	0.0190476	0.0160179	0.249925	AAUGUG,AUGUGG,GGAAGG	AAGGCG,AAGGGA,AAGGGG,AAGGUG,AAUGUG,AGGAAG,AGGCGA,AGGGAA,AGGGAU,AGGGGA,AUGGGA,AUGGGG,AUGUGG,CGAUGG,CGGGAU,CGGGGG,CUGGGG,GAAGGG,GAAGGU,GAAUGU,GAGGAA,GAGGGG,GAUGGG,GGAAGG,GGAAUG,GGAGGA,GGAGGG,GGAUGG,GGCGAA,GGGAAG,GGGAAU,GGGAGG,GGGAUG,GGGCUG,GGGGAA,GGGGAG,GGGGCU,GGGGGC,GGGGGG,GGGGUA,UGGGAA,UGGGGU,UGUGGG
PABPC4	1	2478	0.00952381	0.0081021	0.233243	AAAAAG	AAAAAA,AAAAAG
SNRPA	3	4998	0.0190476	0.0163382	0.221361	GCAGUA,GGAGAU,GUUUCC	ACCUGC,AGCAGU,AGGAGA,AGUAGG,AGUAGU,AUACCU,AUGCAC,AUGCUG,AUUCCU,AUUGCA,CAGUAG,CCUGCU,CUGCUA,GAGCAG,GAUACC,GAUUCC,GCAGUA,GGAGAU,GGGUAU,GGUAUG,GUAGGC,GUAGGG,GUAGUC,GUAGUG,GUAUGC,GUUACC,GUUUCC,UACCUG,UAUGCU,UCCUGC,UGCACA,UGCACC,UGCACG,UUACCU,UUCCUG,UUGCAC,UUUCCU
HNRNPL	3	5019	0.0190476	0.0164068	0.215314	AAAUAA,ACACCA,CACAAA	AAACAA,AAACAC,AAAUAA,AAAUAC,AACAAA,AACACA,AAUAAA,AAUACA,ACACAA,ACACAC,ACACCA,ACACGA,ACAUAA,ACAUAC,ACCACA,CACAAA,CACAAC,CACAAG,CACACA,CACACC,CACCAC,CACGAA,CACGAC,CACGAG,CAUAAA,CAUACA
PUM1	7	10205	0.0380952	0.0333562	0.191655	AAUGUU,AGAUAA,GUAAAU,UAAUGU,UAUAUA,UGUAAA,UGUCCA	AAUAUU,AAUGUU,AAUUGU,ACAUAA,AGAAUU,AGAUAA,AUUGUA,CAGAAU,CCAGAA,CUUGUA,GAAUUG,GUAAAU,GUAAUA,GUACAU,GUAGAU,GUAUAU,GUCCAG,UAAAUA,UAAUAU,UAAUGU,UACAUA,UACAUC,UAGAUA,UAUAUA,UGUAAA,UGUAAU,UGUACA,UGUAGA,UGUAUA,UGUCCA,UUAAUG,UUGUAC,UUGUAG,UUUAAU
SRSF2	35	46380	0.171429	0.151587	0.177464	AAAAGA,ACGAGA,AGAGGU,AGAUAA,AGCACU,AGCUGU,AGGGUA,AUGAUG,CAGAGG,CCAGGG,CCUCAG,CGAGAU,GAGAUA,GAUCAC,GCAGUA,GCUGCU,GGAAGG,GGAGAU,GGAGCC,GGCCAC,GGGUAC,GGUAAG,GGUCAG,GUCAGU,GUUGGC,UACGAG,UCCAGG,UCCUCA,UCCUCC,UGAUGG,UGCAGU,UUCCAG,UUCCCA	AAAAGA,AAAGAG,AAAGGA,AACCAG,AACGAG,AAGAAG,AAGAGA,AAGCAG,AAGCGG,AAGCUG,AAGGAG,AAGGCG,AAGUAC,AAUACC,AAUCCC,AAUGCC,AAUGCU,ACCACC,ACCACU,ACCAGC,ACCAGU,ACCCCC,ACCCCU,ACCCGC,ACCCGG,ACCGGU,ACCGUA,ACCUCC,ACCUGC,ACGAGA,ACGAGG,ACGCUG,ACGGAG,ACGUGU,ACUACC,ACUACU,ACUAGA,ACUCAA,ACUCCC,ACUCCU,ACUGUA,AGAAGA,AGAAGC,AGAAUA,AGAAUG,AGACUA,AGAGAA,AGAGAU,AGAGGA,AGAGGU,AGAGUA,AGAGUG,AGAGUU,AGAUAA,AGAUCC,AGAUGC,AGCACU,…
NOVA2	3	5284	0.0190476	0.0172729	0.141097	AACACC,AGAUCA,GAUCAC	AACACC,ACCACC,AGACAU,AGAUCA,AGCACC,AGGCAU,AGUCAU,AUCAAC,AUCACC,AUCAUC,CCUAGA,CUAGAU,GAGACA,GAGGCA,GAGUCA,GAUCAC,GGGGGG,UAGAUC,UUUUUU
G3BP1	2	4296	0.0142857	0.0140439	0.0246336	CACCGG,CCUAGG	ACACGC,ACAGGC,ACCCAC,ACCCAU,ACCCCC,ACCCCU,ACCCGC,ACCGGC,ACGCAC,ACGCAG,ACGCCC,ACGCCG,AGGCAC,AGGCAG,AGGCCC,AGGCCG,AUACGC,AUAGGC,AUCCGC,AUCGGC,CACACG,CACAGG,CACCCG,CACCGG,CACGCA,CACGCC,CAGGCA,CAGGCC,CAUACG,CAUAGG,CAUCCG,CAUCGG,CCACAC,CCACAG,CCACCC,CCACCG,CCACGC,CCAGGC,CCAUAC,CCAUAG,CCAUCC,CCAUCG,CCCACA,CCCACC,CCCACG,CCCAGG,CCCAUA,CCCAUC,CCCCAC,CCCCAG,CCCCCA,CCCCCC,CCCCCG,CCCCGC,CCCCGG,CCCCUA,CCCCUC,…
ZFP36	23	35081	0.114286	0.114658	-0.00469571	AAAAAG,AAAAGA,AAAAUA,AAAGAA,AAAUAA,AAGAAA,AAGGAA,AAUAAG,ACAAAC,ACUUGU,ACUUUU,AGGAAA,AGUAAA,AUAAGU,UAAAGA,UCCUCC,UCCUUU,UCUUCC,UCUUUU,UUGUGC,UUUAAA	AAAAAA,AAAAAC,AAAAAG,AAAAAU,AAAACA,AAAAGA,AAAAGC,AAAAGG,AAAAGU,AAAAUA,AAACAA,AAAGAA,AAAGCA,AAAGGA,AAAGUA,AAAUAA,AACAAA,AACAAG,AAGAAA,AAGCAA,AAGGAA,AAGUAA,AAUAAA,AAUAAG,ACAAAC,ACAAAG,ACAAAU,ACAAGC,ACAAGG,ACAAGU,ACCUCC,ACCUCU,ACCUGC,ACCUGU,ACCUUC,ACCUUU,ACUUCC,ACUUCU,ACUUGC,ACUUGU,ACUUUC,ACUUUU,AGAAAG,AGCAAA,AGGAAA,AGUAAA,AUAAAC,AUAAAG,AUAAAU,AUAAGC,AUAAGG,AUAAGU,AUUUAA,AUUUAU,CAAACA,CAAAGA,CAAAUA,…
SFPQ	12	20621	0.0619048	0.0673988	-0.122672	AAGAAC,AAGGAA,AGAGGU,GAAGGA,GGUAAG,GUAAGA,UAAUGU,UAGGGG,UCGGAA,UGAUGG,UGGUGU,UGGUUU	AAGAAC,AAGAGC,AAGAGG,AAGCAA,AAGGAA,AAGGAC,AAGGGA,ACUGGG,AGAGAG,AGAGGA,AGAGGU,AGAUCG,AGGAAC,AGGACC,AGGGAU,AGGGGG,AUCGGA,CAGGCA,CUAAGG,CUGGAG,CUGGGA,GAAGAA,GAAGAG,GAAGCA,GAAGGA,GACUGG,GAGAGG,GAGGAA,GAGGAC,GAGGUA,GAUCGG,GCAGGC,GGAAGA,GGACUG,GGAGAG,GGAGGA,GGAGGG,GGGAUC,GGGGAC,GGGGAU,GGGGGA,GGGGGG,GGUAAG,GGUCUG,GUAAGA,GUAAUG,GUAAUU,GUAGUG,GUAGUU,GUCUGG,GUGAUG,GUGAUU,GUGGUG,GUGGUU,UAAGAG,UAAGGA,UAAGGG,…
KHDRBS3	4	8065	0.0238095	0.0263621	-0.146924	AAAUAA,AGAUAA,AUAAAA,GAUAAA	AAAUAA,AAUAAA,AGAUAA,AUAAAA,AUAAAC,AUAAAG,AUUAAA,GAUAAA,UAAAAC,UAAAUA,UUAAAC,UUUUUU
PCBP2	6	11782	0.0333333	0.0385103	-0.208279	AAAUUA,AAUUAC,ACCAAA,AUUCAC,CCUCCU,CUUCCU	AAACCA,AAAUUA,AAAUUC,AACCAA,AACCCU,AAUUAA,AAUUAC,AAUUCA,AAUUCC,ACAUUA,ACCAAA,ACCCUA,ACCUUA,AUUAAA,AUUACC,AUUCAC,AUUCCA,AUUCCC,CAAUUA,CAUUAA,CCAUUA,CCAUUC,CCCCCA,CCCCCC,CCCCCU,CCCUAA,CCCUCC,CCCUUA,CCCUUC,CCUCCA,CCUCCC,CCUCCU,CCUUAA,CCUUCC,CUAACC,CUCCCA,CUCCCC,CUCCCU,CUUAAA,CUUCCA,CUUCCC,CUUCCU,GGGGGG,UAACCC,UCCCCA,UUAGAG,UUAGGA,UUAGGG,UUUUUU
KHDRBS2	2	5142	0.0142857	0.0168088	-0.234647	AUAAAA,GAUAAA	AAUAAA,AUAAAA,AUAAAC,GAUAAA,UUUUUU
QKI	1	3649	0.00952381	0.0119293	-0.324896	ACUUAU	AAUCAU,ACACAC,ACACUA,ACUAAC,ACUAAU,ACUCAU,ACUUAU,AUCAUA,AUCUAA,AUCUAC,AUUAAC,CACACU,CACUAA,CUAACA,CUAACC,CUAACG,CUAAUC,CUACUC,CUCAUA,UAACCU,UAAUCA,UACUCA,UCAUAU,UCUAAU,UCUACU
NOVA1	2	5503	0.0142857	0.0179887	-0.332517	AACACC,CAUUCA	AACACC,ACCACC,AGCACC,AGUCAC,AUCAAC,AUCACC,AUCAUC,AUUCAU,CAGUCA,CAUUCA,CCCCCC,GGGGGG,UCAGUC,UCAUUC,UUCAUU,UUUUUU
FMR1	6	13527	0.0333333	0.0442135	-0.407521	AAGGAA,AGGAUU,AGGGAG,CAGCUG,GAAGGA,UGACAG	AAAAAA,AAGCGG,AAGGAA,AAGGAG,AAGGAU,AAGGGA,ACUAAG,ACUGGG,ACUGGU,AGCAGC,AGCGAA,AGCGAC,AGCGGC,AGCUGG,AGGAAG,AGGAAU,AGGAGG,AGGAGU,AGGAUG,AGGAUU,AGGCAC,AGGGAG,AGUGGC,AUAGGC,AUGGAG,CAGCUG,CAUAGG,CGAAGG,CGACUG,CGGCUG,CUAAGG,CUAUGG,CUGAGG,CUGGGC,CUGGUG,GAAGGA,GAAGGG,GACAAG,GACAGG,GACUAA,GACUGG,GAGCGA,GAGCGG,GAGGAU,GCAGCU,GCAUAG,GCGAAG,GCGACU,GCGGCU,GCUAAG,GCUAUG,GCUGAG,GCUGGG,GGACAA,GGACAG,GGACUA,GGCAUA,…
SRSF5	1	3918	0.00952381	0.0128084	-0.427485	CACAGA	AACAGC,AAGAAG,AGAAGA,AGGAAG,AUAAAG,CAACAG,CACAGA,CACAGC,CACAUA,CACAUC,CACGGA,CACGGC,CACGUA,CACGUC,CCGCAG,CGCAGA,CGCAGC,CGCAGG,CGCAUA,CGCAUC,CGCGGA,CGCGUC,GAAGAA,GAGGAA,GGAAGA,UAAAGG,UACAGA,UACAGC,UACAUA,UACAUC,UACGGA,UACGGC,UACGUA,UACGUC,UGCAGA,UGCAGC,UGCAUA,UGCAUC,UGCGGA,UGCGGC,UGCGUA,UGCGUC
ZRANB2	1	4009	0.00952381	0.0131059	-0.460601	AGGUAA	AAAGGU,AGGGAA,AGGUAA,AGGUAC,AGGUAG,AGGUAU,AGGUCU,AGGUUA,AGGUUU,CGGUAA,CGGUAG,CGGUAU,CGGUCU,GAGGUU,GGGUAA,GGGUGA,GGUAAA,GGUGGU,GUAAAG,GUGGUG,UAAAGG,UGGUAA,UGGUGG
IGHMBP2	0	2019	0.0047619	0.00660195	-0.471354	AAAAAA	AAAAAA
SSB	0	2129	0.0047619	0.00696147	-0.547853	CUGUUU,GCUGUU,UGCUGU,UGUUUU	CUGUUU,GCUGUU,UGCUGU,UGUUUU
ENOX1	0	2184	0.0047619	0.00714122	-0.584632	AAGACA,AAUACA,AGACAG,AGGACA,AGUACA,AUACAG,CAGACA,CAUACA,CGGACA,CGUACA,GGACAG,GUACAG,UAGACA,UAUACA,UGGACA,UGUACA	AAGACA,AAUACA,AGACAG,AGGACA,AGUACA,AUACAG,CAGACA,CAUACA,CGGACA,CGUACA,GGACAG,GUACAG,UAGACA,UAUACA,UGGACA,UGUACA
TIA1	9	24363	0.047619	0.0796287	-0.74175	AUUUUC,CUCCUU,CUUUUA,CUUUUC,UCCUUU,UCUCCU,UUUUCU	AUUUUC,AUUUUG,AUUUUU,CCUUUC,CUCCUU,CUUUUA,CUUUUC,CUUUUG,CUUUUU,GUUUUA,GUUUUC,GUUUUG,GUUUUU,UAUUUU,UCCUUU,UCUCCU,UUAUUU,UUCUCC,UUUAUU,UUUUAU,UUUUCG,UUUUCU,UUUUGG,UUUUGU,UUUUUA,UUUUUC,UUUUUG,UUUUUU
DAZAP1	4	12269	0.0238095	0.040102	-0.752134	AGGAAA,AGGUAA,AGUAAA,UAGGAU	AAAAAA,AAUUUA,AGAUAU,AGGAAA,AGGAAG,AGGAUA,AGGAUG,AGGUAA,AGGUAG,AGGUUA,AGGUUG,AGUAAA,AGUAAG,AGUAGG,AGUAUA,AGUAUG,AGUUAA,AGUUAG,AGUUUA,AGUUUG,GGGGGG,GUAACG,UAGGAA,UAGGAU,UAGGUA,UAGGUU,UAGUAA,UAGUAU,UAGUUA,UAGUUU,UUUUUU
KHDRBS1	3	10005	0.0190476	0.0327026	-0.779793	AUAAAA,CAAAAU,UAAAAA	AUAAAA,AUUUAA,AUUUAC,CAAAAU,CUAAAA,CUAAAU,GAAAAC,UAAAAA,UAAAAC,UAAAAG,UUAAAA,UUAAAU,UUUUAC,UUUUUU
U2AF2	1	5167	0.00952381	0.0168905	-0.826605	UUUUCC	UUUUCC,UUUUUC,UUUUUU
PABPC1	1	5407	0.00952381	0.0176749	-0.892094	ACAAAC	AAAAAA,AAAAAC,ACAAAC,ACAAAU,ACGAAC,ACGAAU,ACUAAC,ACUAAU,AGAAAA,CAAACA,CAAACC,CAAAUA,CAAAUC,CGAACA,CGAACC,CGAAUA,CGAAUC,CUAACA,CUAACC,CUAAUA,CUAAUC,GAAAAA,GAAAAC
HNRNPK	2	8308	0.0142857	0.0271563	-0.926711	GCCCAG,UCCCAA	AAAAAA,ACCCAA,ACCCAU,ACCCCA,ACCCCC,ACCCGA,ACCCGC,ACCCGU,ACCCUU,CAAACC,CAACCC,CAUACC,CAUCCC,CCAAAC,CCAACC,CCAUAC,CCAUCC,CCCCAA,CCCCAC,CCCCAU,CCCCCA,CCCCCC,CCCCCU,CCCCUA,CCCCUU,GCCCAA,GCCCAC,GCCCAG,GCCCCC,GCCCCU,GGGGGG,UCCCAA,UCCCAC,UCCCAU,UCCCCA,UCCCCC,UCCCCU,UCCCGA,UCCCUA,UCCCUU,UUUUUU
MSI1	0	2926	0.0047619	0.0095663	-1.00642	AGGAAG,AGGAGG,AGGUAG,AGGUGG,AGUAAG,AGUAGG,AGUUAG,AGUUGG,UAGGAA,UAGGAG,UAGGUA,UAGGUG,UAGUAA,UAGUAG,UAGUUA,UAGUUG	AGGAAG,AGGAGG,AGGUAG,AGGUGG,AGUAAG,AGUAGG,AGUUAG,AGUUGG,UAGGAA,UAGGAG,UAGGUA,UAGGUG,UAGUAA,UAGUAG,UAGUUA,UAGUUG
PCBP1	4	14713	0.0238095	0.0480897	-1.01419	AAAUUA,AAUUAC,ACCAAA,AUUCAC	AAAAAA,AAACCA,AAAUUA,AAAUUC,AACCAA,AAUUAA,AAUUAC,AAUUCA,AAUUCC,ACAUUA,ACCAAA,ACCCUC,ACCUUA,AUUAAA,AUUACC,AUUCAC,AUUCCA,AUUCCC,CAAACC,CAACCC,CAAUCC,CAAUUA,CACCCU,CAUACC,CAUCCC,CAUUAA,CAUUCC,CCAAAC,CCAACC,CCAAUC,CCACCC,CCAUAC,CCAUCC,CCAUUA,CCAUUC,CCCACC,CCCCAA,CCCCAC,CCCCCC,CCCUCC,CCCUCU,CCCUUA,CCCUUC,CCUAAC,CCUACC,CCUAUC,CCUCCC,CCUCUU,CCUUAA,CCUUAC,CCUUCC,CCUUUC,CUAACC,CUACCC,CUAUCC,CUUAAA,CUUACC,…
ZCRB1	0	3148	0.0047619	0.0102919	-1.11189	AAUUAA,ACUUAA,AUUUAA,GAAUUA,GACUUA,GAUUAA,GAUUUA,GCUUAA,GGAUUA,GGCUUA,GGUUUA,GUUUAA	AAUUAA,ACUUAA,AUUUAA,GAAUUA,GACUUA,GAUUAA,GAUUUA,GCUUAA,GGAUUA,GGCUUA,GGUUUA,GUUUAA
AGO2	0	3187	0.0047619	0.0104193	-1.12965	AAAAAA,AAAGUG,AAGUGC,AGUGCU,GUGCUU,UAAAGU	AAAAAA,AAAGUG,AAGUGC,AGUGCU,GUGCUU,UAAAGU
A1CF	0	3189	0.0047619	0.0104259	-1.13056	AGUAUA,AUAAUU,AUCAGU,CAGUAU,GAUCAG,UAAUUA,UAAUUG,UCAGUA,UGAUCA,UUAAUU	AGUAUA,AUAAUU,AUCAGU,CAGUAU,GAUCAG,UAAUUA,UAAUUG,UCAGUA,UGAUCA,UUAAUU
FUS	1	6428	0.00952381	0.0210119	-1.14159	UGGUGU	AAAAAA,CGGUGA,CGGUGG,GGGGGG,GGGUGA,GGGUGC,GGGUGG,GGGUGU,UGGUGA,UGGUGG,UGGUGU,UUUUUU
HNRNPC	2	9926	0.0142857	0.0324444	-1.18339	GGAUUC,GGGUAC	AUUUUU,CUUUUU,GCAUAC,GGAUAC,GGAUAU,GGAUUC,GGGGGG,GGGUAC,UUUUUA,UUUUUC,UUUUUG,UUUUUU
CPEB4	0	3371	0.0047619	0.0110207	-1.2106	UUUUUU	UUUUUU
DDX19B	0	3371	0.0047619	0.0110207	-1.2106	UUUUUU	UUUUUU
EIF4A3	0	3371	0.0047619	0.0110207	-1.2106	UUUUUU	UUUUUU
ELAVL2	14	51619	0.0714286	0.168709	-1.23997	AUUUUC,CAUUUU,CUUUUA,UAAGUU,UAUAUA,UAUAUU,UCAUUU,UCUUUU,UUACUU,UUCUUU,UUUACU,UUUCUU,UUUUAA	AAUUUA,AAUUUG,AAUUUU,AUACUU,AUAUUU,AUUAUU,AUUUAA,AUUUAC,AUUUAG,AUUUAU,AUUUUA,AUUUUC,AUUUUG,AUUUUU,CAUUUU,CUUAUA,CUUUAA,CUUUCU,CUUUUA,CUUUUU,GAUUUA,GAUUUU,GUAUUG,GUUUUA,GUUUUC,GUUUUU,UAAGUU,UAAUUU,UACUUU,UAGUUA,UAUACU,UAUAUA,UAUAUU,UAUGUU,UAUUAU,UAUUGA,UAUUGU,UAUUUA,UAUUUG,UAUUUU,UCAUUU,UCUUAU,UCUUUU,UGAUUU,UGUAUU,UUAAGU,UUAAUU,UUACUU,UUAGUU,UUAUAC,UUAUAU,UUAUGU,UUAUUG,UUAUUU,UUCAUU,UUCUUU,UUGAUU,…
SART3	0	3605	0.0047619	0.0117855	-1.3074	AAAAAA,AAAAAC,AGAAAA,GAAAAA,GAAAAC	AAAAAA,AAAAAC,AGAAAA,GAAAAA,GAAAAC
TIAL1	7	29056	0.0380952	0.0949668	-1.31781	AUUUUC,CUUUUA,CUUUUC,UCAGUU,UUUAAA,UUUUAA	AAAUUU,AAUUUU,AGUUUU,AUUUUA,AUUUUC,AUUUUG,AUUUUU,CAGUUU,CUUUUA,CUUUUC,CUUUUG,CUUUUU,GUUUUC,GUUUUU,UAAAUU,UAUUUU,UCAGUU,UUAAAU,UUAUUU,UUCAGU,UUUAAA,UUUAUU,UUUCAG,UUUUAA,UUUUAU,UUUUCA,UUUUUA,UUUUUC,UUUUUG,UUUUUU
CPEB2	1	7276	0.00952381	0.0237834	-1.32034	CAUUUU	AUUUUU,CAUUUU,CCUUUU,CUUUUU,UUUUUU
ZFP36L2	0	4180	0.0047619	0.0136647	-1.52085	AUUUAU,UAUUUA,UUAUUU,UUUAUU	AUUUAU,UAUUUA,UUAUUU,UUUAUU
HNRNPA1	4	21615	0.0238095	0.0706474	-1.5691	CAGGGA,GGAAGG,GGAGCC,UAGGAU	AAAAAA,AAAGAG,AAGAGG,AAGGAG,AAGGUG,AAGUAC,AAUUUA,ACUAGA,AGACUA,AGAGGA,AGAUAU,AGAUUA,AGGAAG,AGGAGC,AGGGAC,AGGGCA,AGGGUU,AGUACG,AGUAGG,AGUGAA,AGUGGU,AGUUAG,AUAGAA,AUAGCA,AUAGGG,AUUAGA,AUUUAA,AUUUAU,CAAAGA,CAAGGA,CAGGGA,CCAAGG,CCCCCC,CGUAGG,CUAGAC,GAAGGU,GACUAG,GACUUA,GAGGAA,GAGGAG,GAGUGG,GAUUAG,GCAGGC,GCCAAG,GGAAGG,GGACUU,GGAGCC,GGAGGA,GGCAGG,GGGACU,GGGCAG,GGGUUA,GGUGCG,GGUUAG,GUAAGU,GUACGC,GUAGGG,…
PPIE	11	52266	0.0571429	0.170824	-1.57987	AAAAUA,AAAUAA,AAAUUA,AUAAAA,AUAUAU,UAAAAA,UAAAAU,UAUAUA,UAUAUU,UUUAAA,UUUUAA	AAAAAA,AAAAAU,AAAAUA,AAAAUU,AAAUAA,AAAUAU,AAAUUA,AAAUUU,AAUAAA,AAUAAU,AAUAUA,AAUAUU,AAUUAA,AAUUAU,AAUUUA,AAUUUU,AUAAAA,AUAAAU,AUAAUA,AUAAUU,AUAUAA,AUAUAU,AUAUUA,AUAUUU,AUUAAA,AUUAAU,AUUAUA,AUUAUU,AUUUAA,AUUUAU,AUUUUA,AUUUUU,UAAAAA,UAAAAU,UAAAUA,UAAAUU,UAAUAA,UAAUAU,UAAUUA,UAAUUU,UAUAAA,UAUAAU,UAUAUA,UAUAUU,UAUUAA,UAUUAU,UAUUUA,UAUUUU,UUAAAA,UUAAAU,UUAAUA,UUAAUU,UUAUAA,UUAUAU,UUAUUA,UUAUUU,UUUAAA,…
SYNCRIP	0	5390	0.0047619	0.0176194	-1.88755	AAAAAA,UUUUUU	AAAAAA,UUUUUU
RALY	0	5402	0.0047619	0.0176586	-1.89076	UUUUUC,UUUUUG,UUUUUU	UUUUUC,UUUUUG,UUUUUU
HNRNPU	0	5481	0.0047619	0.0179168	-1.9117	AAAAAA,CCCCCC,GGGGGG,UUUUUU	AAAAAA,CCCCCC,GGGGGG,UUUUUU
HNRNPCL1	0	6867	0.0047619	0.0224466	-2.23689	AUUUUU,CUUUUU,UUUUUG,UUUUUU	AUUUUU,CUUUUU,UUUUUG,UUUUUU
HNRNPD	0	7610	0.0047619	0.024875	-2.38509	AAAAAA,AAUUUA,AGAUAU,AGUAGG,AUUUAU,UAUUUA,UUAGAG,UUAGGA,UUAGGG,UUAUUU,UUUAUU	AAAAAA,AAUUUA,AGAUAU,AGUAGG,AUUUAU,UAUUUA,UUAGAG,UUAGGA,UUAGGG,UUAUUU,UUUAUU
ELAVL4	1	15657	0.00952381	0.051175	-2.42583	UAUCUA	AAAAAA,AUCUAA,AUUUAU,GUAUCU,UAUCUA,UAUUUA,UAUUUU,UCUAAU,UGUAUC,UUAUUU,UUGUAU,UUUAUU,UUUGUA,UUUUAU,UUUUUA,UUUUUU
ELAVL1	1	16459	0.00952381	0.0537961	-2.49789	UGGUUU	AUUUAU,CCCCCC,UAGUUU,UAUUUA,UAUUUU,UGAUUU,UGGUUU,UGUUUU,UUAGUU,UUAUUU,UUGAUU,UUGGUU,UUGUUU,UUUAGU,UUUAUU,UUUGGU,UUUGUU,UUUUUG,UUUUUU
ELAVL3	0	10190	0.0047619	0.0333072	-2.80622	AUUUAU,AUUUUA,UAUUUA,UAUUUU,UUAUUU,UUUAUU,UUUUUU	AUUUAU,AUUUUA,UAUUUA,UAUUUU,UUAUUU,UUUAUU,UUUUUU

## Sheet: location in GRs
Table showing the location of the motifs in the upstream and downstream genomic ranges (GR) of circALPK2
motif	location upstream GR	location downstream GR	RBP
AAACUC	61	NA	IGF2BP2,IGF2BP3
AAUGAU	107	NA	RBM46,SRSF7
AAUGUG	163	NA	HNRNPF,HNRNPH1,HNRNPH2,HNRNPH3
AAUGUU	143	NA	PUM1
ACAAAC	59	NA	HNRNPLL,IGF2BP2,IGF2BP3,PABPC1,ZFP36
ACCAAA	205	NA	PCBP1,PCBP2,RBMX
ACCGGA	28	NA	SRSF1
ACUAGG	19	NA	HNRNPDL
ACUUAU	173	NA	QKI,SF1
AGAGGU	38	NA	SFPQ,SRSF1,SRSF2
AGAUCA	77	NA	NOVA2,SRSF7
AGAUCU	84	NA	SRSF7
AGCACU	16	NA	SRSF2
AGCUGU	199	NA	PTBP1,SRSF2
AGGAUU	7	NA	FMR1,G3BP2
AGGGAG	73	NA	FMR1,RBM5
AGGGGC	22	NA	HNRNPA2B1
AGUAAA	102	NA	DAZAP1,ZFP36
AUAUAU	181	NA	AKAP1,PPIE,RBMS3
AUGAUG	108	NA	RBM46,SRSF2
AUGUGG	164	NA	HNRNPF,HNRNPH1,HNRNPH2,HNRNPH3
AUUCUC	10,185	NA	RBM20
AUUUUC	117	NA	ELAVL2,PTBP1,TIA1,TIAL1
CACAAA	58	NA	HNRNPL
CACAGA	81	NA	SF1,SRSF1,SRSF5
CACCGG	27	NA	G3BP1,SRSF1
CACUAG	18	NA	HNRNPDL
CAGAGG	37	NA	SRSF1,SRSF2
CAGCAC	15	NA	SRSF6
CAGGGA	72	NA	HNRNPA1
CAUCCU	193	NA	SRSF6
CAUGGU	132	NA	SRSF1
CAUUUU	116	NA	CPEB2,ELAVL2
CCACAA	57	NA	YBX1
CCAGGG	71	NA	SRSF1,SRSF2
CCAUGG	131	NA	SRSF1
CCGGAG	29	NA	SRSF1
CCUAGG	4	NA	G3BP1,SRSF1
CGGAGC	30	NA	SRSF1
CUAGCU	197	NA	HNRNPDL
CUAGGA	5	NA	HNRNPDL
CUAGGG	20	NA	SRSF1
CUAUAU	179	NA	RBMS3
CUCCUU	88	NA	KHSRP,TIA1
CUCUUC	188	91	PTBP1,RBM5,SRSF3,SRSF7
CUCUUU	64	NA	PTBP1,RBM4
CUGUGU	124	NA	KHSRP
CUUCAU	190	NA	SRSF3
CUUUUC	66	17	PTBP1,TIA1,TIAL1
GAAAAU	140	NA	PABPC5
GAGAUC	76	NA	SRSF7
GAUCAC	78	NA	NOVA2,SRSF2
GAUGGU	110	NA	SRSF1
GCAAAC	169	NA	HNRNPLL,IGF2BP2
GCACCG	26	NA	SRSF1
GCACUA	17	NA	HNRNPDL
GCAGUA	100	NA	SNRPA,SRSF2
GCAUGC	150	NA	RBFOX1,YTHDC1
GCAUGU	154	NA	RBFOX1
GCCCAG	34	NA	HNRNPK
GGAGAU	75	NA	LIN28A,SNRPA,SRSF1,SRSF2
GGAGCC	31	NA	HNRNPA1,HNRNPA2B1,HNRNPA3,SRSF1,SRSF2,SRSF9
GGAUUC	8	NA	HNRNPC,SRSF1
GGCCAC	55	NA	SRSF2
GGGGCA	23	NA	SRSF1
GGUCAG	41	NA	SRSF2
GGUGUG	135	NA	CELF4
GUCAGU	42	NA	SRSF2
GUGUGA	136	NA	RBM24
GUUGGC	146	NA	SRSF2
UAAAAU	104	NA	PPIE
UAGCUG	198	NA	PTBP1
UAGGAU	6	NA	DAZAP1,HNRNPA1
UAGGGG	21	NA	SFPQ
UAUAUA	180	NA	AKAP1,ELAVL2,PPIE,PUM1,PUM2,RBMS1,RBMS3
UAUAUU	182	NA	ELAVL2,KHSRP,PPIE
UAUCUA	176	NA	ELAVL4
UCACAG	80	NA	SRSF6
UCAGUU	43	NA	TIAL1
UCAUCC	192	NA	SRSF3,SRSF6
UCAUUU	115	NA	ELAVL2
UCCAGG	70	NA	SRSF2
UCUCAG	12	NA	SRSF6
UCUCCU	87	NA	TIA1
UCUCUG	121	NA	NELFE,SRSF6
UCUCUU	187	90	PTBP1
UCUGUG	123	NA	RC3H1
UCUUCA	189	NA	SRSF3,SRSF7
UCUUUU	65	21	ELAVL2,PTBP1,ZFP36
UGAAAA	139	NA	SRSF9
UGAACA	93	NA	SRSF1,SRSF9
UGAUGG	109	NA	SFPQ,SRSF1,SRSF9,SRSF2
UGCAGU	99	NA	SNRPB2,SRSF2
UGCAUG	153	171	KHSRP,RBFOX1,RBFOX2
UGGUGU	134	NA	FUS,SFPQ
UGUCCA	157	NA	PUM1
UGUGUG	125	54,56,58,60,62,64,66,68,70,72,74,76,78,80,82,84	CELF1,CELF2,CELF4,CELF5,CELF6,CSTF2,KHSRP,RBM24,TARDBP
UGUUGG	145	NA	ZNF638
UUCAUC	191	NA	SRSF3
UUCCAG	69	NA	SRSF2
UUCUCU	120,186	NA	PTBP1,RBM5
UUGCCU	1,47	NA	MBNL1
UUUCUC	119	NA	SRSF6,RBM20
UUUUCC	67	NA	PTBP1,U2AF2
UUUUCU	118	18	PTBP1,TIA1
AAAAAG	NA	43	PABPC4,ZFP36
AAAAGA	NA	44	PABPN1,SRSF1,SRSF10,SRSF2,ZFP36
AAAAUA	NA	138	PPIE,ZFP36
AAAGAA	NA	27,45	SRSF1,SRSF10,TRA2B,ZFP36,TRA2A
AAAUAA	NA	139	HNRNPL,KHDRBS3,PPIE,ZFP36
AAAUCA	NA	133	IGF2BP2,IGF2BP3
AAAUUA	NA	31	PCBP1,PCBP2,PPIE
AACACC	NA	152	NOVA1,NOVA2
AAGAAA	NA	28	SRSF10,ZFP36,TRA2A
AAGAAC	NA	46	SFPQ,SRSF1,TRA2B
AAGACU	NA	13	RBM3
AAGGAA	NA	195	FMR1,HNRNPA2B1,HNRNPM,RBM5,SFPQ,SRSF10,TRA2B,ZFP36,RBMX
AAUAAG	NA	140	TRA2B,ZFP36
AAUCAA	NA	134	RBM46,SNRNP70
AAUUAC	NA	32	PCBP1,PCBP2
ACACCA	NA	153	HNRNPDL,HNRNPL,HNRNPLL,YBX1
ACAUUC	NA	106	IGF2BP2,IGF2BP3,SRSF3
ACGAGA	NA	36	SRSF2,SRSF7
ACUUCA	NA	101	SRSF3
ACUUGU	NA	166	ZFP36
ACUUUU	NA	16	PTBP1,ZFP36
AGAAAU	NA	29	PABPC5
AGAUAA	NA	39	KHDRBS3,PUM1,SRSF2
AGGAAA	NA	196	DAZAP1,SRSF1,SRSF9,TRA2B,ZFP36
AGGGUA	NA	161	RBM5,SRSF2
AGGUAA	NA	9	DAZAP1,RBM5,SRSF1,ZRANB2
AUAAAA	NA	41	KHDRBS1,KHDRBS2,KHDRBS3,PPIE
AUAAGU	NA	141	ZFP36
AUACCA	NA	121	HNRNPDL
AUCAAA	NA	135	RBM46,RBMX
AUGACA	NA	174	FXR1,SRSF1,SRSF9
AUUACG	NA	33	SRSF1
AUUCAC	NA	108	PCBP1,PCBP2
CAAAAU	NA	137	KHDRBS1
CAACAC	NA	151	IGF2BP2
CAGCUG	NA	178	FMR1
CAUUCA	NA	107	IGF2BP2,IGF2BP3,NOVA1,SRSF3
CCUCAG	NA	5	SRSF2,SRSF6
CCUCCU	NA	2	PCBP2
CCUUUA	NA	96	HNRNPDL
CGAGAU	NA	37	SRSF2,SRSF7
CGGAAG	NA	192	SRSF1
CUCAGG	NA	6	SRSF1,SRSF6
CUCGGA	NA	190	EIF4B,SRSF1
CUGCUC	NA	187	MBNL1
CUGCUG	NA	181,184	MBNL1
CUGGUU	NA	203	NELFE
CUUCAC	NA	102	SRSF3,SRSF7,SRSF6
CUUCCU	NA	93	PCBP2,PTBP1,RBM4
CUUGUG	NA	167	MBNL1
CUUUUA	NA	22	ELAVL2,TIA1,TIAL1
GAAAUC	NA	198	IGF2BP2
GAAAUU	NA	30	PABPC5
GAAGGA	NA	194	FMR1,HNRNPA2B1,HNRNPM,RBM5,SFPQ,SRSF1,SRSF9,TRA2B,RBMX
GAGAUA	NA	38	SRSF2
GAUAAA	NA	40	KHDRBS2,KHDRBS3
GCAUGA	NA	172	RBFOX1
GCUCGG	NA	189	SRSF1
GCUGCU	NA	180,183,186	MBNL1,SRSF2
GGAAGG	NA	193	HNRNPF,HNRNPH1,HNRNPH2,HNRNPH3,SRSF1,SRSF2,SRSF7,SRSF9,TRA2B,HNRNPA1,RBMX
GGGUAC	NA	162	HNRNPC,SRSF1,SRSF2,YTHDC1
GGUAAG	NA	10	SFPQ,SRSF2
GUAAAU	NA	131	PUM1,PUM2
GUAAGA	NA	11	SFPQ
GUCUCU	NA	89	NELFE
GUGUGU	NA	53,55,57,59,61,63,65,67,69,71,73,75,77,79,81,83,85	CELF1,CELF2,CELF4,CELF5,CSTF2,KHSRP,RBM24,TARDBP
GUUUCC	NA	145	SNRPA
UAAAAA	NA	42	KHDRBS1,PPIE
UAAAGA	NA	26	ZFP36
UAAGAC	NA	12	RBMX
UAAGUU	NA	142	ELAVL2
UAAUGU	NA	127	PUM1,SFPQ
UACGAG	NA	35	SRSF2
UACUUC	NA	100	SRSF3
UACUUG	NA	165	RBM41
UCAAAA	NA	136	RBMX
UCACAA	NA	110	SRSF3
UCAGGU	NA	7	SRSF1
UCCCAA	NA	148	HNRNPK
UCCUCA	NA	4	SRSF2
UCCUCC	NA	1	SRSF2,ZFP36
UCCUUU	NA	95	TIA1,ZFP36
UCGGAA	NA	191	EIF4B,SFPQ
UCUGGU	NA	202	NELFE
UCUUCC	NA	92	SRSF3,ZFP36
UGACAG	NA	175	FMR1,FXR2,SRSF1,SRSF9
UGCUGC	NA	182,185	MBNL1,SF1,YTHDC1
UGGUUU	NA	204	ELAVL1,SFPQ
UGUAAA	NA	130	PUM1,PUM2
UGUCUC	NA	88	MBNL1
UUACGA	NA	34	SRSF3
UUACUU	NA	99	ELAVL2,PTBP1,RBM41
UUCCCA	NA	147	SRSF2
UUCCUU	NA	94	PTBP1,RBM4
UUCUUU	NA	20	ELAVL2,PTBP1
UUGCUA	NA	116	MBNL1
UUGUGC	NA	168	MBNL1,TARDBP,ZFP36
UUUAAA	NA	24	PPIE,TIAL1,ZFP36
UUUACU	NA	98	ELAVL2
UUUCCC	NA	146	PTBP1
UUUCUU	NA	19	ELAVL2,PTBP1,RBM20
UUUUAA	NA	23	ELAVL2,PPIE,TIAL1
