# Supplementary material for: circRNAprofiler: an R-based computational framework for the downstream analysis of circular RNAs
Source: BMC Bioinformatics. 2020 Apr 29;21:164. doi: 10.1186/s12859-020-3500-3 (PMC7191743; doi:10.1186/s12859-020-3500-3)
Supplement: Supplementary file 4 — Additional file 4. miRNA binding sites analysis. This file contains the results of the miRNA binding sites analysis in the ALPK2 circRNA sequence. [file 12859_2020_3500_MOESM4_ESM.xlsx]

## Sheet: Target
Table showing the target ALPK2 circRNA sequence.
id	gene	transcript	strand	chrom	startGR	endGR	length	seq	type
ALPK2:-:chr18:56247780:56246046	ALPK2	ENST00000361673.3	-	chr18	56246046	56247780	1735	CUGUACCAAAAAUGAUGCUGCUGUCUAUCAAAUCUCGGCUAAAAACUCUUUUGGAAUGAUCUGUUGUUCUGCUUCCGUUGAGGUUGAGUGCUCAUCAGAGAACCCACAAUUGUCUCCUAACCUGGAAGAUGACAGGGACAGGGGUUGGAAACAUGAAACAGGGACACAUGAAGAAGAAAGGGCAAAUCAGAUUGAUGAGAAGGAACAUCCUUAUAAGGAAGAAGAAAGCAUCUCCCCGGGCACUCCCAGGUCAGCUGACUCCUCCCCCUCCAAAUCCAACCAUUCACUCUCCCUCCAGUCAUUGGGCAAUCUUGACAUUAGUGUGUCCAGUUCUGAAAAUCCUUUGGGUGUUAAAGGAACAAGGCACACUGGAGAGGCUUAUGAUCCAAGUAACACAGA…	circ

## Sheet: miRs
miRNAs used in the analysis
id
>hsa-miR-1-3p
>hsa-miR-126-3p
>hsa-miR-145-5p
>hsa-miR-133a-3p
>hsa-miR-451a
>hsa-miR-23b-3p
>hsa-let-7a-5p
>hsa-miR-3074-5p
>hsa-miR-24-3p
>hsa-let-7f-5p
>hsa-miR-26a-5p
>hsa-miR-30c-5p
>hsa-miR-30b-5p
>hsa-miR-143-3p
>hsa-miR-23a-3p
>hsa-miR-30d-5p
>hsa-miR-126-5p
>hsa-miR-29c-3p
>hsa-miR-99a-5p
>hsa-miR-29b-3p
>hsa-miR-16-5p
>hsa-miR-27b-3p
>hsa-miR-125b-5p
>hsa-miR-378a-3p
>hsa-let-7g-5p
>hsa-miR-499b-3p
>hsa-miR-499a-5p
>hsa-miR-101-3p
>hsa-miR-30a-5p
>hsa-miR-21-5p
>hsa-let-7b-5p
>hsa-miR-29a-3p
>hsa-miR-27a-3p
>hsa-miR-103a-3p
>hsa-miR-103b
>hsa-miR-30e-5p
>hsa-miR-19b-3p
>hsa-miR-191-5p
>hsa-miR-195-5p
>hsa-let-7e-5p
>hsa-let-7d-5p
>hsa-miR-222-3p
>hsa-miR-221-3p
>hsa-miR-125a-5p
>hsa-miR-22-3p
>hsa-let-7c-5p
>hsa-miR-26b-5p
>hsa-miR-214-3p
>hsa-miR-3120-5p
>hsa-miR-15a-5p
>hsa-miR-199a-3p
>hsa-miR-208b-3p
>hsa-miR-223-3p
>hsa-miR-342-3p
>hsa-let-7i-5p
>hsa-miR-140-3p
>hsa-miR-144-3p
>hsa-miR-130a-3p
>hsa-miR-133a-5p
>hsa-miR-181a-5p
>hsa-miR-15b-5p
>hsa-miR-19a-3p
>hsa-miR-486-3p
>hsa-miR-486-5p
>hsa-miR-20a-5p
>hsa-miR-99b-5p
>hsa-miR-34a-5p
>hsa-miR-374b-5p
>hsa-miR-374c-3p
>hsa-miR-185-5p
>hsa-miR-133b
>hsa-miR-22-5p
>hsa-miR-455-3p
>hsa-miR-100-5p
>hsa-miR-199b-5p
>hsa-miR-139-5p
>hsa-miR-199b-3p
>hsa-miR-484
>hsa-miR-3607-5p
>hsa-miR-29c-5p
>hsa-miR-106b-5p
>hsa-miR-3607-3p
>hsa-miR-17-5p
>hsa-miR-1-5p
>hsa-miR-107
>hsa-miR-378a-5p
>hsa-miR-652-3p
>hsa-miR-365b-3p
>hsa-miR-199a-5p
>hsa-miR-365a-3p
>hsa-miR-144-5p
>hsa-miR-152-3p
>hsa-miR-424-5p
>hsa-miR-376c-3p
>hsa-miR-93-5p
>hsa-miR-320a
>hsa-miR-148a-3p
>hsa-miR-151a-5p
>hsa-miR-98-5p
>hsa-miR-378d
>hsa-miR-574-3p
>hsa-miR-10a-5p
>hsa-miR-150-5p
>hsa-miR-28-5p
>hsa-miR-18a-5p
>hsa-miR-3184-5p
>hsa-miR-423-3p
>hsa-miR-378c
>hsa-miR-10b-5p
>hsa-miR-218-5p
>hsa-miR-146b-5p
>hsa-miR-497-5p
>hsa-miR-301a-3p
>hsa-miR-142-3p
>hsa-miR-92a-3p
>hsa-miR-660-5p
>hsa-miR-590-5p
>hsa-miR-499b-5p
>hsa-miR-499a-3p
>hsa-miR-335-5p
>hsa-miR-197-3p
>hsa-miR-181b-5p
>hsa-miR-454-3p
>hsa-miR-423-5p
>hsa-miR-3184-3p
>hsa-miR-590-3p
>hsa-miR-186-5p
>hsa-miR-208b-5p
>hsa-miR-3065-5p
>hsa-miR-338-3p
>hsa-miR-490-3p
>hsa-miR-30e-3p
>hsa-miR-744-5p
>hsa-miR-128-3p
>hsa-miR-361-5p
>hsa-miR-99a-3p
>hsa-miR-425-5p
>hsa-miR-30a-3p
>hsa-miR-148b-3p
>hsa-miR-302b-3p
>hsa-miR-145-3p
>hsa-miR-452-5p
>hsa-miR-193a-5p
>hsa-miR-193b-3p
>hsa-miR-142-5p
>hsa-miR-95-3p
>hsa-miR-302d-3p
>hsa-miR-135a-5p
>hsa-miR-664a-3p
>hsa-miR-361-3p
>hsa-miR-28-3p
>hsa-miR-190a-3p
>hsa-miR-143-5p
>hsa-miR-140-5p
>hsa-miR-3074-3p
>hsa-miR-24-1-5p
>hsa-let-7a-3p
>hsa-miR-505-3p
>hsa-miR-101-5p
>hsa-miR-210-3p
>hsa-miR-24-2-5p
>hsa-miR-708-5p
>hsa-miR-214-5p
>hsa-miR-3120-3p
>hsa-miR-192-5p
>hsa-let-7d-3p
>hsa-miR-494-3p
>hsa-miR-1307-3p
>hsa-miR-374a-5p
>hsa-miR-149-5p
>hsa-miR-136-5p
>hsa-miR-29b-2-5p
>hsa-miR-17-3p
>hsa-miR-132-3p
>hsa-miR-32-5p
>hsa-miR-652-5p
>hsa-miR-483-3p
>hsa-miR-7-5p
>hsa-miR-3529-3p
>hsa-miR-146a-5p
>hsa-miR-324-3p
>hsa-miR-769-5p
>hsa-miR-25-3p
>hsa-miR-125b-2-3p
>hsa-miR-151a-3p
>hsa-miR-16-2-3p
>hsa-miR-106a-5p
>hsa-miR-628-5p
>hsa-miR-208a-3p
>hsa-miR-340-5p
>hsa-let-7b-3p
>hsa-miR-503-5p
>hsa-miR-421
>hsa-miR-181c-5p
>hsa-miR-340-3p
>hsa-miR-324-5p
>hsa-miR-1287-5p
>hsa-miR-204-5p
>hsa-miR-221-5p
>hsa-miR-320c
>hsa-miR-190a-5p
>hsa-miR-20b-5p
>hsa-miR-181a-2-3p
>hsa-miR-320b
>hsa-miR-151b
>hsa-miR-127-3p
>hsa-miR-542-3p
>hsa-miR-379-5p
>hsa-miR-551b-3p
>hsa-miR-320d
>hsa-miR-337-3p
>hsa-miR-27b-5p
>hsa-miR-1307-5p
>hsa-miR-452-3p
>hsa-miR-887-3p
>hsa-let-7f-1-3p
>hsa-miR-495-3p
>hsa-miR-194-5p
>hsa-miR-337-5p
>hsa-miR-99b-3p
>hsa-miR-224-5p
>hsa-miR-106b-3p
>hsa-miR-345-5p
>hsa-miR-381-3p
>hsa-miR-9-5p
>hsa-miR-338-5p
>hsa-miR-3065-3p
>hsa-miR-550a-3p
>hsa-miR-550b-2-5p
>hsa-miR-497-3p
>hsa-miR-302a-3p
>hsa-miR-31-5p
>hsa-miR-409-3p
>hsa-miR-224-3p
>hsa-miR-450a-5p
>hsa-miR-532-5p
>hsa-miR-376b-3p
>hsa-miR-339-3p
>hsa-miR-362-3p
>hsa-miR-29a-5p
>hsa-miR-15b-3p
>hsa-miR-675-3p
>hsa-miR-299-5p
>hsa-miR-331-3p
>hsa-miR-376a-3p
>hsa-miR-296-5p
>hsa-miR-1180-3p
>hsa-miR-2110
>hsa-miR-20a-3p
>hsa-miR-483-5p
>hsa-miR-642b-3p
>hsa-miR-642a-5p
>hsa-miR-671-5p
>hsa-miR-193a-3p
>hsa-miR-130b-3p
>hsa-miR-339-5p
>hsa-miR-132-5p
>hsa-miR-181a-3p
>hsa-miR-455-5p
>hsa-miR-545-3p
>hsa-miR-125b-1-3p
>hsa-miR-500a-3p
>hsa-miR-33a-5p
>hsa-miR-155-5p
>hsa-miR-505-5p
>hsa-miR-491-5p
>hsa-miR-203b-5p
>hsa-miR-203a-3p
>hsa-miR-411-5p
>hsa-miR-493-5p
>hsa-miR-487b-3p
>hsa-miR-329-3p
>hsa-miR-502-3p
>hsa-miR-154-5p
>hsa-miR-181c-3p
>hsa-miR-625-3p
>hsa-miR-92b-3p
>hsa-miR-363-3p
>hsa-miR-625-5p
>hsa-miR-34a-3p
>hsa-miR-3591-3p
>hsa-miR-122-5p
>hsa-miR-425-3p
>hsa-miR-1248
>hsa-miR-134-5p
>hsa-miR-369-3p
>hsa-miR-18b-5p
>hsa-miR-187-3p
>hsa-miR-877-5p
>hsa-miR-7-1-3p
>hsa-miR-182-5p
>hsa-miR-382-5p
>hsa-miR-93-3p
>hsa-miR-26b-3p
>hsa-miR-4524b-5p
>hsa-miR-4524a-3p
>hsa-miR-1301-3p
>hsa-miR-9-3p
>hsa-miR-30c-2-3p
>hsa-miR-532-3p
>hsa-miR-302c-3p
>hsa-miR-1306-5p
>hsa-miR-34c-5p
>hsa-miR-33a-3p
>hsa-miR-200a-3p
>hsa-miR-148b-5p
>hsa-miR-4532
>hsa-miR-7704
>hsa-let-7f-2-3p
>hsa-miR-766-3p
>hsa-miR-584-5p
>hsa-miR-624-5p
>hsa-miR-136-3p
>hsa-miR-212-3p
>hsa-miR-193b-5p
>hsa-miR-3620-3p
>hsa-miR-3909
>hsa-miR-98-3p
>hsa-miR-582-5p
>hsa-miR-23b-5p
>hsa-miR-655-3p
>hsa-miR-30b-3p
>hsa-miR-302a-5p
>hsa-miR-598-3p
>hsa-miR-21-3p
>hsa-miR-501-3p
>hsa-miR-326
>hsa-miR-342-5p
>hsa-miR-188-5p
>hsa-miR-654-3p
>hsa-let-7i-3p
>hsa-miR-30c-1-3p
>hsa-miR-328-3p
>hsa-miR-424-3p
>hsa-miR-200b-3p
>hsa-miR-130b-5p
>hsa-miR-543
>hsa-let-7g-3p
>hsa-miR-3656
>hsa-miR-376c-5p
>hsa-miR-376a-5p
>hsa-miR-331-5p
>hsa-miR-490-5p
>hsa-miR-3117-3p
>hsa-let-7e-3p
>hsa-miR-125a-3p
>hsa-miR-454-5p
>hsa-miR-181d-5p
>hsa-miR-664a-5p
>hsa-miR-34b-5p
>hsa-miR-382-3p
>hsa-miR-489-3p
>hsa-miR-369-5p
>hsa-miR-493-3p
>hsa-miR-502-5p
>hsa-miR-628-3p
>hsa-miR-874-5p
>hsa-miR-409-5p
>hsa-miR-200c-3p
>hsa-miR-500b-5p
>hsa-miR-19b-1-5p

## Sheet: miR results
Table showing the miR results.
Cut-off used: ≥6 total matches between the seed region of the miRNAs and the seed site in the target sequence of which at least 5 are canonical Watson-Crick matches and 1 can be a non-canonical match.
See package vignettes for an explanation about the content of each column.
miRid	miRseq	miRseqRev	counts	totMatchesInSeed	cwcMatchesInSeed	seedLocation	t1	totMatchesInCentral	cwcMatchesInCentral	totMatchesInCompensatory	cwcMatchesInCompensatory	localAUcontent
>hsa-miR-130b-5p	ACUCUUUCCCUGUUGCACUAC	CAUCACGUUGUCCCUUUCUCA	48	6,6,6,6,6,6,6,7,6,6,6,6,6,6,6,6,6,6,6,6,6,6,6,6,6,6,6,6,6,6,6,6,6,6,6,6,6,6,6,6,6,6,6,6,6,6,6,6	4mer,4mer,2mer,2mer,4mer,2mer,3mer,5mer,3mer,2mer,4mer,3mer,3mer,5mer,5mer,3mer,3mer,4mer,2mer,2mer,3mer,2mer,5mer,4mer,3mer,5mer,4mer,3mer,2mer,4mer,3mer,3mer,5mer,4mer,2mer,5mer,5mer,2mer,3mer,2mer,6mer,4mer,3mer,5mer,4mer,4mer,3mer,3mer	124,125,131,137,155,157,170,176,199,215,217,218,409,845,856,859,912,1016,1051,1107,1169,1182,1196,1198,1199,1244,1246,1248,1250,1252,1255,1293,1323,1325,1327,1338,1353,1355,1432,1434,1511,1513,1515,1568,1594,1643,1662,1664	G,A,A,G,G,A,A,C,C,A,G,A,U,A,A,G,U,U,A,G,A,C,A,G,A,A,A,A,A,A,A,C,A,U,G,C,G,G,A,U,A,A,U,A,C,G,A,A	1,2,2,4,1,2,1,2,2,1,1,3,2,1,2,2,3,2,2,2,1,1,1,2,2,1,3,1,2,2,2,2,2,2,1,3,3,2,1,2,2,1,1,2,1,1,1,2	1,1,2,4,1,1,1,2,1,0,1,1,1,1,1,1,2,2,2,1,1,1,1,2,2,1,3,0,2,2,2,1,1,0,1,2,1,2,1,1,0,1,1,0,1,1,1,1	2,3,3,3,3,1,2,3,2,1,1,2,3,1,2,2,1,3,1,2,3,2,3,2,2,3,2,2,2,4,2,1,2,2,3,2,2,3,3,2,2,2,2,2,3,2,3,3	1,2,1,1,2,1,1,1,0,0,1,1,2,0,0,1,1,1,1,0,1,2,2,2,1,1,1,1,1,2,1,1,1,1,2,0,1,1,2,1,1,0,1,0,3,1,2,2	0.45,0.45,0.45,0.55,0.6,0.6,0.55,0.7,0.7,0.7,0.7,0.65,0.7,0.8,0.6,0.45,0.5,0.4,0.5,0.65,0.6,0.45,0.5,0.45,0.5,0.6,0.65,0.65,0.65,0.6,0.6,0.5,0.3,0.35,0.4,0.4,0.5,0.55,0.55,0.55,0.55,0.65,0.65,0.6,0.6,0.5,0.65,0.55
>hsa-miR-452-3p	CUCAUCUGCAAAGAAGUAAGUG	GUGAAUGAAGAAACGUCUACUC	41	6,6,6,6,6,6,6,6,6,6,6,6,6,6,6,7,7,6,6,6,6,6,6,6,6,6,6,6,6,6,6,6,6,6,6,6,6,6,6,6,6	4mer,3mer,6mer,4mer,5mer,3mer,5mer,3mer,3mer,4mer,3mer,6mer,3mer,4mer,5mer,3mer,7mer,5mer,3mer,3mer,5mer,5mer,4mer,5mer,4mer,3mer,3mer,5mer,4mer,6mer,5mer,3mer,5mer,3mer,3mer,3mer,4mer,4mer,3mer,3mer,3mer	53,81,126,165,188,189,192,247,252,396,408,457,504,519,531,627,741,744,783,822,849,860,861,1055,1083,1084,1109,1233,1234,1256,1257,1272,1292,1317,1328,1379,1394,1446,1503,1714,1719	U,G,C,A,A,U,G,G,C,A,G,U,C,U,A,C,U,C,C,G,C,A,A,C,A,A,G,A,U,A,G,G,G,C,G,G,A,U,U,A,U	3,3,2,0,0,1,0,1,0,0,3,0,1,0,1,1,3,2,1,2,0,0,1,0,0,0,0,0,0,0,1,2,1,1,1,1,1,0,0,2,0	3,3,1,0,0,1,0,1,0,0,3,0,1,0,1,1,3,1,1,1,0,0,1,0,0,0,0,0,0,0,1,2,1,1,1,1,1,0,0,2,0	2,3,2,0,1,0,1,0,2,1,0,1,3,2,2,3,0,3,3,2,2,1,2,1,1,3,2,2,2,0,0,2,0,0,2,2,0,1,1,1,1	2,1,1,0,1,0,0,0,1,0,0,1,3,1,0,1,0,2,1,1,2,1,1,1,0,2,1,2,2,0,0,2,0,0,2,2,0,0,1,1,0	0.7,0.45,0.35,0.55,0.6,0.55,0.6,0.3,0.3,0.7,0.7,0.65,0.55,0.55,0.4,0.45,0.5,0.55,0.65,0.55,0.7,0.55,0.5,0.6,0.45,0.45,0.7,0.6,0.6,0.55,0.5,0.6,0.55,0.4,0.45,0.3,0.35,0.65,0.55,0.4,0.45
>hsa-miR-22-5p	AGUUCUUCAGUGGCAAGCUUUA	AUUUCGAACGGUGACUUCUUGA	40	6,6,6,6,6,6,6,6,6,6,6,6,6,6,6,6,6,6,6,6,6,6,6,6,6,6,6,6,6,6,6,6,6,6,6,6,6,6,6,6	5mer,4mer,6mer,6mer,4mer,4mer,6mer,6mer,4mer,3mer,3mer,6mer,3mer,3mer,3mer,3mer,5mer,4mer,3mer,5mer,4mer,5mer,4mer,5mer,4mer,3mer,3mer,3mer,2mer,3mer,3mer,3mer,5mer,5mer,3mer,4mer,3mer,3mer,3mer,4mer	97,98,170,173,199,200,218,221,354,361,388,398,399,446,514,606,677,808,809,857,858,996,1086,1103,1172,1173,1235,1248,1294,1339,1412,1449,1475,1476,1515,1571,1595,1602,1648,1667	C,C,A,G,C,A,A,G,A,A,A,U,U,A,G,U,C,C,U,U,G,U,G,A,C,C,C,A,C,U,C,C,C,U,U,G,A,A,A,G	3,2,3,2,2,2,2,1,2,1,2,3,2,2,3,2,3,2,2,2,2,2,2,2,1,2,3,2,2,1,2,2,3,2,1,3,1,1,1,2	2,1,2,0,1,0,1,0,0,1,1,3,2,1,2,0,2,1,1,0,2,1,2,0,0,2,2,0,2,0,1,2,1,1,1,1,1,1,1,2	3,1,2,0,1,3,1,1,2,0,1,1,2,2,1,0,3,2,2,1,2,0,2,2,1,1,1,1,1,2,0,1,1,2,3,2,1,1,1,1	2,1,1,0,1,3,1,1,1,0,1,1,1,1,1,0,2,1,2,1,1,0,1,1,0,0,1,1,0,2,0,1,1,1,2,2,1,1,1,1	0.55,0.55,0.55,0.55,0.7,0.7,0.65,0.55,0.55,0.55,0.65,0.65,0.55,0.75,0.45,0.5,0.5,0.4,0.45,0.5,0.45,0.35,0.4,0.5,0.55,0.5,0.55,0.65,0.5,0.4,0.45,0.55,0.3,0.35,0.65,0.55,0.6,0.5,0.65,0.6
>hsa-miR-1248	ACCUUCUUGUAUAAGCACUGUGCUAAA	AAAUCGUGUCACGAAUAUGUUCUUCCA	38	6,6,6,6,6,7,6,6,6,6,6,6,6,6,6,6,6,6,6,6,6,6,6,6,6,6,6,7,6,6,6,6,6,6,6,6,7,7	3mer,2mer,6mer,5mer,4mer,6mer,3mer,4mer,6mer,5mer,4mer,3mer,5mer,3mer,3mer,6mer,2mer,2mer,2mer,3mer,4mer,3mer,4mer,3mer,4mer,3mer,4mer,4mer,3mer,5mer,6mer,4mer,6mer,4mer,4mer,6mer,7mer,6mer	136,157,171,174,175,197,215,216,219,222,358,371,534,860,911,996,1051,1083,1107,1170,1198,1199,1246,1310,1325,1328,1337,1355,1356,1397,1412,1434,1446,1513,1572,1602,1644,1668	G,A,A,G,G,A,A,A,A,C,C,C,C,A,G,U,A,A,G,A,G,A,A,C,U,G,A,G,U,G,C,U,U,A,U,A,C,C	2,3,1,2,2,3,3,2,2,2,2,2,1,1,2,1,1,2,2,3,3,1,2,2,3,1,2,3,1,2,2,2,2,3,2,3,1,2	1,2,1,1,1,1,2,2,1,1,1,1,1,1,0,1,1,1,1,2,1,1,0,1,2,1,0,1,1,0,1,1,1,3,1,1,1,1	2,0,1,2,2,1,1,2,3,1,3,1,2,1,2,1,1,2,1,0,1,1,2,1,1,2,2,2,1,0,1,1,1,1,2,1,1,2	1,0,1,1,1,1,0,1,1,0,1,1,1,0,1,1,1,1,1,0,1,1,1,1,1,2,1,1,0,0,1,1,1,1,1,1,1,1	0.55,0.6,0.5,0.55,0.6,0.7,0.7,0.65,0.55,0.5,0.5,0.55,0.45,0.55,0.5,0.35,0.5,0.45,0.65,0.5,0.45,0.5,0.65,0.45,0.35,0.45,0.45,0.55,0.65,0.4,0.45,0.55,0.65,0.65,0.6,0.5,0.6,0.6
>hsa-miR-502-5p	AUCCUUGCUAUCUGGGUGCUA	AUCGUGGGUCUAUCGUUCCUA	37	6,6,6,6,6,6,6,6,6,6,6,6,6,6,6,6,6,6,6,6,6,6,6,6,6,6,6,6,6,6,6,6,6,6,6,7,6	3mer,3mer,4mer,5mer,4mer,5mer,5mer,2mer,4mer,4mer,5mer,2mer,3mer,3mer,3mer,6mer,5mer,5mer,4mer,4mer,3mer,3mer,4mer,5mer,5mer,4mer,6mer,5mer,3mer,3mer,3mer,3mer,5mer,4mer,5mer,6mer,3mer	132,158,176,213,214,352,360,627,729,805,806,849,907,1052,1109,1168,1169,1196,1197,1200,1245,1289,1324,1338,1353,1354,1364,1365,1376,1390,1399,1538,1568,1569,1600,1662,1663	C,C,C,A,G,A,C,C,G,A,A,C,A,U,G,G,A,A,G,A,G,U,G,C,G,G,A,A,U,A,A,C,A,A,G,A,G	4,2,2,1,2,2,3,1,2,2,2,3,0,2,2,2,2,1,2,2,1,1,2,3,2,3,2,3,2,3,2,2,1,4,2,2,3	3,1,1,1,2,1,1,1,1,1,1,2,0,1,1,2,2,1,1,1,0,1,1,1,1,1,1,1,2,1,2,1,0,3,1,2,1	1,2,2,1,2,3,2,2,1,2,1,3,2,3,1,3,2,3,2,3,2,2,2,2,4,2,1,1,1,2,3,2,1,2,2,3,2	1,2,1,1,1,0,1,1,1,1,1,1,1,3,0,2,1,3,2,2,1,1,1,0,1,0,0,0,1,1,2,2,0,1,1,2,1	0.4,0.65,0.7,0.6,0.65,0.5,0.55,0.45,0.65,0.5,0.4,0.7,0.55,0.55,0.7,0.55,0.6,0.5,0.45,0.55,0.55,0.5,0.3,0.4,0.5,0.55,0.45,0.45,0.5,0.45,0.5,0.35,0.6,0.6,0.4,0.65,0.55
>hsa-miR-204-5p	UUCCCUUUGUCAUCCUAUGCCU	UCCGUAUCCUACUGUUUCCCUU	35	6,6,6,6,6,6,6,6,6,6,6,6,6,6,6,6,6,6,6,6,6,6,6,6,7,6,6,6,6,6,6,6,6,6,6	5mer,4mer,5mer,6mer,2mer,3mer,4mer,5mer,3mer,5mer,4mer,3mer,3mer,5mer,4mer,4mer,2mer,3mer,3mer,2mer,3mer,3mer,4mer,2mer,6mer,2mer,4mer,2mer,4mer,2mer,4mer,6mer,5mer,2mer,4mer	132,138,158,177,178,198,199,353,409,807,846,857,861,1052,1108,1109,1170,1200,1201,1247,1338,1355,1356,1379,1399,1400,1448,1503,1512,1514,1646,1663,1664,1665,1670	C,U,C,A,A,A,C,C,U,C,U,U,A,U,A,G,A,A,U,C,C,G,U,G,A,A,C,U,G,C,A,G,A,A,U	2,2,3,2,1,2,1,3,3,4,2,4,2,1,1,2,1,2,1,1,2,3,1,3,3,1,1,1,2,2,1,0,3,2,2	2,1,3,1,0,2,0,2,1,2,1,4,1,1,0,2,1,1,1,1,1,1,1,2,1,1,1,1,2,1,1,0,1,2,1	3,1,2,2,2,1,2,3,2,2,1,3,1,0,3,1,4,1,1,1,3,1,3,1,2,3,1,2,2,3,0,2,1,1,2	1,1,1,1,0,0,1,2,1,2,1,2,1,0,2,1,4,1,0,1,2,0,1,1,1,2,0,1,1,2,0,1,1,1,1	0.4,0.55,0.65,0.7,0.7,0.65,0.7,0.5,0.7,0.3,0.7,0.5,0.5,0.55,0.65,0.7,0.5,0.55,0.5,0.65,0.4,0.55,0.65,0.3,0.5,0.45,0.6,0.55,0.55,0.6,0.65,0.55,0.55,0.6,0.6
>hsa-miR-30b-3p	CUGGGAGGUGGAUGUUUACUUC	CUUCAUUUGUAGGUGGAGGGUC	35	6,6,6,6,6,6,6,6,6,6,6,6,6,6,7,6,6,6,6,6,6,6,6,6,6,6,6,6,6,6,6,6,6,6,6	3mer,4mer,4mer,5mer,3mer,6mer,5mer,6mer,3mer,5mer,5mer,3mer,5mer,3mer,6mer,4mer,3mer,4mer,3mer,4mer,3mer,3mer,4mer,5mer,5mer,2mer,3mer,3mer,2mer,3mer,5mer,3mer,4mer,5mer,2mer	91,113,114,231,232,242,243,261,266,267,288,291,292,479,592,622,668,703,902,1023,1061,1077,1124,1133,1134,1223,1373,1469,1521,1523,1554,1615,1638,1727,1728	G,A,C,G,G,G,G,C,A,A,C,G,U,U,C,G,G,G,G,G,U,G,C,A,G,A,G,A,C,C,U,A,A,A,G	2,3,2,2,1,0,2,1,2,3,2,2,3,2,3,1,2,1,1,1,2,0,2,2,3,1,1,2,1,1,2,0,3,1,1	0,0,1,2,1,0,2,1,1,3,2,1,2,0,2,1,1,1,1,0,0,0,1,1,1,1,1,1,1,1,1,0,2,1,0	3,3,3,3,3,1,2,3,2,1,1,2,1,2,3,2,2,3,3,1,2,2,4,1,1,3,2,2,3,3,1,3,2,3,2	0,3,2,1,1,1,1,1,1,1,1,2,1,1,1,1,1,1,1,1,1,0,1,1,1,1,1,1,2,1,0,1,1,0,1	0.45,0.5,0.55,0.4,0.5,0.25,0.3,0.5,0.5,0.45,0.55,0.5,0.55,0.55,0.55,0.45,0.4,0.6,0.45,0.3,0.5,0.5,0.55,0.4,0.35,0.6,0.5,0.55,0.55,0.45,0.45,0.65,0.5,0.5,0.5
>hsa-miR-26b-3p	CCUGUUCUCCAUUACUUGGCU	UCGGUUCAUUACCUCUUGUCC	33	6,6,6,6,6,6,6,6,6,6,6,6,6,6,6,6,6,6,7,6,6,6,6,6,6,6,6,6,6,6,6,6,6	4mer,4mer,3mer,5mer,4mer,5mer,3mer,5mer,4mer,4mer,4mer,4mer,4mer,2mer,3mer,3mer,2mer,4mer,7mer,4mer,4mer,3mer,4mer,3mer,3mer,2mer,2mer,3mer,5mer,3mer,3mer,3mer,2mer	129,135,136,155,175,202,248,356,357,453,470,568,630,827,1011,1014,1029,1100,1105,1106,1182,1238,1250,1277,1297,1310,1351,1384,1442,1532,1535,1597,1598	G,G,G,G,G,C,C,G,G,A,U,A,U,U,C,A,U,A,G,G,C,U,A,A,U,C,A,C,A,C,C,G,A	2,1,2,1,2,1,1,1,2,1,0,0,1,1,3,2,1,1,2,1,1,1,2,2,1,3,2,2,2,0,0,2,1	1,0,1,1,1,1,1,1,1,1,0,0,1,0,2,1,1,1,2,0,1,0,1,1,0,3,1,1,1,0,0,1,0	2,2,3,3,2,3,1,2,2,2,3,2,1,2,2,4,3,2,1,0,3,1,0,2,1,4,1,2,2,2,1,1,1	1,2,1,1,1,1,0,2,2,1,1,1,1,1,1,2,3,2,0,0,2,1,0,2,0,3,0,1,1,1,1,1,1	0.4,0.55,0.55,0.6,0.6,0.65,0.3,0.45,0.5,0.65,0.55,0.8,0.4,0.65,0.4,0.4,0.45,0.5,0.55,0.65,0.45,0.6,0.65,0.55,0.5,0.45,0.55,0.35,0.55,0.4,0.4,0.5,0.55
>hsa-miR-30a-3p	CUUUCAGUCGGAUGUUUGCAGC	CGACGUUUGUAGGCUGACUUUC	33	6,6,6,6,6,6,6,6,6,6,6,6,6,6,6,6,6,6,6,6,6,6,7,6,6,6,6,6,6,6,6,6,6	3mer,3mer,3mer,4mer,5mer,4mer,6mer,3mer,2mer,3mer,2mer,3mer,5mer,5mer,4mer,4mer,4mer,3mer,5mer,4mer,4mer,2mer,6mer,3mer,2mer,4mer,4mer,4mer,4mer,4mer,3mer,2mer,5mer	38,121,122,145,152,167,332,333,369,395,404,405,443,512,571,674,684,760,824,825,842,908,1145,1146,1253,1319,1320,1396,1429,1430,1445,1659,1694	A,G,A,C,C,A,A,U,G,A,A,U,A,A,U,A,U,U,A,U,G,U,A,U,U,A,G,G,G,A,G,G,C	3,2,1,1,0,1,1,1,2,1,0,0,2,1,0,3,1,1,1,0,3,2,1,3,1,1,2,2,2,1,2,1,3	2,1,1,1,0,1,1,0,1,1,0,0,1,1,0,1,1,0,1,0,1,1,1,1,1,1,1,1,2,1,1,1,2	2,1,1,4,3,2,2,2,3,2,2,3,3,3,2,3,2,2,2,3,1,2,2,2,2,2,4,1,4,2,3,1,2	2,0,1,3,0,1,0,1,2,1,1,1,2,1,2,1,1,0,1,0,0,1,1,0,1,1,2,1,2,1,2,1,1	0.6,0.5,0.5,0.4,0.45,0.5,0.5,0.5,0.55,0.7,0.55,0.6,0.7,0.45,0.65,0.5,0.65,0.55,0.55,0.6,0.65,0.45,0.5,0.45,0.6,0.35,0.3,0.3,0.6,0.6,0.6,0.4,0.6
>hsa-miR-30e-3p	CUUUCAGUCGGAUGUUUACAGC	CGACAUUUGUAGGCUGACUUUC	33	6,6,6,6,6,6,6,6,6,6,6,6,6,6,6,6,6,6,6,6,6,6,7,6,6,6,6,6,6,6,6,6,6	3mer,3mer,3mer,4mer,5mer,4mer,6mer,3mer,2mer,3mer,2mer,3mer,5mer,5mer,4mer,4mer,4mer,3mer,5mer,4mer,4mer,2mer,6mer,3mer,2mer,4mer,4mer,4mer,4mer,4mer,3mer,2mer,5mer	38,121,122,145,152,167,332,333,369,395,404,405,443,512,571,674,684,760,824,825,842,908,1145,1146,1253,1319,1320,1396,1429,1430,1445,1659,1694	A,G,A,C,C,A,A,U,G,A,A,U,A,A,U,A,U,U,A,U,G,U,A,U,U,A,G,G,G,A,G,G,C	3,2,1,1,0,1,1,1,2,1,0,0,2,1,0,3,1,1,1,0,3,2,1,3,1,1,2,2,2,1,2,1,3	2,1,1,1,0,1,1,0,1,1,0,0,1,1,0,1,1,0,1,0,1,1,1,1,1,1,1,1,2,1,1,1,2	2,1,1,4,3,2,2,2,3,2,2,3,3,3,2,3,2,2,2,3,1,2,2,2,2,2,4,1,4,2,3,1,2	2,0,1,3,0,1,0,1,2,1,1,1,2,1,2,1,1,0,1,0,0,1,1,0,1,1,2,1,2,1,2,1,1	0.6,0.5,0.5,0.4,0.45,0.5,0.5,0.5,0.55,0.7,0.55,0.6,0.7,0.45,0.65,0.5,0.65,0.55,0.55,0.6,0.65,0.45,0.5,0.45,0.6,0.35,0.3,0.3,0.6,0.6,0.6,0.4,0.6
>hsa-miR-30c-2-3p	CUGGGAGAAGGCUGUUUACUCU	UCUCAUUUGUCGGAAGAGGGUC	32	6,7,6,6,6,6,6,6,6,6,6,6,6,6,6,6,6,6,6,6,6,6,6,6,6,6,6,6,6,6,6,6	3mer,5mer,4mer,6mer,3mer,6mer,5mer,6mer,3mer,5mer,4mer,3mer,4mer,3mer,2mer,5mer,2mer,3mer,3mer,4mer,5mer,5mer,3mer,2mer,3mer,3mer,2mer,4mer,5mer,5mer,2mer,3mer	91,113,114,231,232,242,243,288,479,592,622,668,703,902,982,1023,1036,1061,1077,1124,1133,1134,1208,1223,1373,1469,1521,1523,1554,1638,1728,1759	G,A,C,G,G,G,G,C,U,C,G,G,G,G,C,G,U,U,G,C,A,G,G,A,G,A,C,C,U,A,G,A	1,2,3,1,3,1,2,2,1,2,2,1,2,3,3,0,1,2,1,1,3,2,1,2,1,2,1,3,1,2,2,3	0,0,1,1,2,1,1,1,0,1,1,1,2,2,1,0,1,1,1,0,2,1,1,1,1,1,1,2,1,1,1,2	3,3,3,3,3,1,2,1,2,3,2,2,3,3,3,1,2,2,2,4,1,1,3,3,2,2,3,3,1,2,2,2	0,3,2,1,1,1,1,1,1,1,1,1,1,1,0,1,2,1,0,1,1,1,1,1,1,1,2,1,0,1,1,1	0.45,0.5,0.55,0.4,0.5,0.25,0.3,0.55,0.55,0.55,0.45,0.4,0.6,0.45,0.45,0.3,0.4,0.5,0.5,0.55,0.4,0.35,0.6,0.6,0.5,0.55,0.55,0.45,0.45,0.5,0.5,0.45
>hsa-miR-30c-1-3p	CUGGGAGAGGGUUGUUUACUCC	CCUCAUUUGUUGGGAGAGGGUC	32	6,7,6,6,6,6,6,6,6,6,6,6,6,6,6,6,6,6,6,6,6,6,6,6,6,6,6,6,6,6,6,6	3mer,5mer,4mer,6mer,3mer,6mer,5mer,6mer,3mer,5mer,4mer,3mer,4mer,3mer,2mer,5mer,2mer,3mer,3mer,4mer,5mer,5mer,3mer,2mer,3mer,3mer,2mer,4mer,5mer,5mer,2mer,3mer	91,113,114,231,232,242,243,288,479,592,622,668,703,902,982,1023,1036,1061,1077,1124,1133,1134,1208,1223,1373,1469,1521,1523,1554,1638,1728,1759	G,A,C,G,G,G,G,C,U,C,G,G,G,G,C,G,U,U,G,C,A,G,G,A,G,A,C,C,U,A,G,A	2,3,3,2,3,2,2,3,2,2,3,2,3,3,3,1,2,2,2,1,3,3,1,2,1,3,1,3,1,2,3,3	1,1,0,1,1,1,1,1,1,1,2,2,1,1,1,1,2,0,1,0,1,2,0,1,0,1,0,1,1,1,1,1	3,3,3,3,3,1,2,1,2,3,2,2,3,3,3,1,2,2,2,4,1,1,3,3,2,2,3,3,1,2,2,2	0,3,2,1,1,1,1,1,1,1,1,1,1,1,0,1,2,1,0,1,1,1,1,1,1,1,2,1,0,1,1,1	0.45,0.5,0.55,0.4,0.5,0.25,0.3,0.55,0.55,0.55,0.45,0.4,0.6,0.45,0.45,0.3,0.4,0.5,0.5,0.55,0.4,0.35,0.6,0.6,0.5,0.55,0.55,0.45,0.45,0.5,0.5,0.45
>hsa-miR-3074-5p	GUUCCUGCUGAACUGAGCCAG	GACCGAGUCAAGUCGUCCUUG	30	6,6,6,6,6,6,6,6,6,6,6,6,6,6,6,6,6,6,6,6,6,6,6,6,6,6,6,6,6,6	3mer,4mer,4mer,4mer,5mer,5mer,4mer,3mer,4mer,3mer,4mer,4mer,5mer,2mer,6mer,4mer,3mer,4mer,4mer,3mer,5mer,2mer,4mer,3mer,4mer,4mer,3mer,4mer,3mer,3mer	96,132,144,158,199,214,627,673,730,907,1014,1052,1082,1109,1160,1169,1196,1289,1334,1353,1365,1390,1391,1399,1535,1538,1568,1592,1600,1663	C,C,A,C,C,G,C,G,U,A,A,U,G,G,U,A,A,U,A,G,A,A,U,A,C,C,A,A,G,G	2,2,1,2,2,3,2,3,1,2,1,2,2,1,2,1,2,0,2,2,1,2,2,0,2,2,1,1,1,3	2,0,0,1,1,1,1,2,1,1,1,1,2,1,2,0,1,0,0,1,0,2,1,0,2,2,1,1,1,1	2,1,1,1,2,2,2,2,1,2,2,1,1,2,2,3,1,2,2,1,2,2,3,3,2,2,2,2,3,2	0,1,1,1,1,2,2,1,1,2,1,1,1,1,0,1,1,1,2,0,1,0,2,1,2,2,0,1,1,2	0.5,0.4,0.5,0.65,0.7,0.65,0.45,0.5,0.65,0.55,0.4,0.55,0.4,0.7,0.75,0.6,0.5,0.5,0.55,0.5,0.45,0.45,0.45,0.5,0.4,0.35,0.6,0.6,0.4,0.55
>hsa-miR-3120-5p	CCUGUCUGUGCCUGCUGUACA	ACAUGUCGUCCGUGUCUGUCC	29	6,6,6,6,6,6,6,6,6,6,6,6,6,6,6,6,6,6,6,6,6,6,6,6,6,7,6,6,6	5mer,5mer,4mer,4mer,3mer,6mer,6mer,3mer,4mer,5mer,5mer,3mer,3mer,3mer,2mer,4mer,5mer,4mer,6mer,6mer,4mer,3mer,3mer,3mer,4mer,3mer,2mer,5mer,4mer	129,135,136,188,248,453,470,550,568,630,684,779,843,1011,1029,1049,1100,1105,1182,1250,1310,1313,1384,1388,1446,1592,1672,1713,1714	G,G,G,A,C,A,U,C,A,U,U,A,C,C,U,G,A,G,C,A,C,C,C,G,U,A,C,G,A	2,3,2,0,1,0,1,2,2,2,2,2,1,3,2,2,2,1,2,1,2,3,2,2,2,1,2,2,1	1,2,1,0,1,0,1,1,1,1,1,1,0,1,2,2,2,1,2,1,0,2,2,1,1,1,1,1,1	2,2,3,2,2,2,3,1,2,1,2,2,1,2,3,1,2,2,3,0,4,3,3,2,1,1,2,2,1	0,2,0,1,2,1,0,0,1,0,1,1,0,1,2,0,1,1,2,0,2,0,2,1,1,0,1,1,0	0.4,0.55,0.55,0.6,0.3,0.65,0.55,0.5,0.8,0.4,0.65,0.75,0.7,0.4,0.45,0.45,0.5,0.55,0.45,0.65,0.45,0.45,0.35,0.4,0.65,0.6,0.6,0.45,0.4
>hsa-miR-500b-5p	AAUCCUUGCUACCUGGGU	UGGGUCCAUCGUUCCUAA	29	6,6,6,6,6,6,6,6,6,6,6,6,6,7,6,6,6,6,6,6,6,7,6,6,6,6,6,6,6	3mer,3mer,5mer,2mer,4mer,3mer,3mer,4mer,4mer,4mer,3mer,3mer,2mer,4mer,5mer,3mer,2mer,6mer,3mer,4mer,3mer,4mer,5mer,6mer,3mer,3mer,5mer,4mer,3mer	133,159,214,410,499,517,708,730,731,781,847,858,913,1053,1081,1138,1161,1169,1202,1231,1254,1290,1340,1365,1377,1504,1663,1671,1720	A,A,G,U,G,G,A,U,U,U,G,G,U,G,G,G,U,A,U,G,G,G,U,A,G,A,G,G,C	2,2,1,2,1,2,2,1,1,2,2,2,4,1,1,1,2,1,1,2,2,1,2,1,2,0,2,3,1	1,1,1,1,0,1,1,1,1,2,1,1,2,1,1,1,2,1,0,1,1,1,1,1,1,0,1,2,1	2,2,2,1,3,1,1,1,2,2,3,2,2,2,1,2,2,3,1,3,1,1,3,2,1,3,2,3,4	2,2,2,1,2,1,1,1,2,1,1,1,1,2,1,1,1,1,0,1,0,1,1,1,1,1,2,2,4	0.5,0.75,0.65,0.7,0.55,0.45,0.5,0.65,0.6,0.7,0.7,0.45,0.4,0.55,0.45,0.45,0.7,0.6,0.5,0.65,0.55,0.55,0.45,0.45,0.4,0.6,0.55,0.55,0.4
>hsa-miR-491-5p	AGUGGGGAACCCUUCCAUGAGG	GGAGUACCUUCCCAAGGGGUGA	28	6,6,6,6,6,6,6,6,6,6,6,6,6,6,6,6,6,7,6,6,7,6,6,6,6,6,6,6	3mer,2mer,5mer,3mer,5mer,4mer,4mer,3mer,3mer,3mer,3mer,4mer,3mer,3mer,3mer,3mer,2mer,7mer,3mer,2mer,7mer,5mer,6mer,5mer,3mer,3mer,3mer,2mer	115,231,233,260,263,290,463,593,717,723,903,957,979,983,1023,1037,1038,1043,1075,1076,1125,1126,1490,1491,1524,1638,1729,1730	C,G,G,C,C,A,A,U,C,C,U,U,U,A,G,C,C,A,C,A,U,G,U,A,C,A,C,U	1,1,0,1,0,0,1,1,0,0,1,1,2,1,1,3,2,0,2,3,0,1,1,2,1,0,0,1	1,1,0,1,0,0,1,1,0,0,1,1,1,1,1,3,2,0,2,3,0,1,1,1,1,0,0,1	1,3,2,1,2,0,3,1,3,1,3,1,0,3,1,2,2,1,0,0,1,2,1,1,3,2,2,3	1,3,1,0,1,0,2,1,2,1,2,1,0,1,0,1,1,1,0,0,1,1,0,1,2,2,1,1	0.55,0.4,0.45,0.45,0.5,0.5,0.55,0.5,0.5,0.6,0.55,0.35,0.4,0.5,0.3,0.4,0.45,0.45,0.55,0.55,0.55,0.5,0.5,0.45,0.5,0.5,0.5,0.6
>hsa-miR-218-5p	UUGUGCUUGAUCUAACCAUGU	UGUACCAAUCUAGUUCGUGUU	27	6,6,6,6,6,6,6,7,6,6,6,6,7,6,6,7,6,6,6,6,7,6,6,6,6,6,6	3mer,3mer,4mer,3mer,3mer,5mer,3mer,5mer,3mer,2mer,3mer,3mer,3mer,3mer,3mer,6mer,5mer,3mer,5mer,3mer,3mer,2mer,3mer,4mer,3mer,5mer,3mer	134,160,162,178,201,226,355,362,389,434,487,494,567,575,1013,1028,1029,1099,1194,1214,1438,1439,1534,1537,1593,1605,1649	G,C,U,A,U,U,A,C,C,U,A,C,G,U,G,G,U,G,A,A,A,C,G,A,G,A,C	2,2,1,1,2,1,1,1,0,1,1,2,0,1,2,2,0,2,2,2,2,1,1,2,2,1,1	1,1,1,1,2,1,1,1,0,1,0,2,0,1,2,1,0,2,1,1,2,0,1,1,1,1,0	1,2,2,2,1,2,3,1,2,3,1,1,0,0,1,1,1,0,0,1,2,2,1,1,3,1,1	1,1,1,1,1,1,1,0,1,2,1,1,0,0,1,1,1,0,0,1,1,1,1,1,2,0,1	0.45,0.65,0.65,0.7,0.7,0.4,0.5,0.5,0.7,0.85,0.55,0.45,0.7,0.6,0.4,0.4,0.45,0.45,0.5,0.55,0.55,0.5,0.35,0.4,0.55,0.5,0.65
>hsa-miR-3909	UGUCCUCUAGGGCCUGCAGUCU	UCUGACGUCCGGGAUCUCCUGU	27	6,6,6,6,6,6,6,6,6,6,6,6,6,6,6,6,6,6,6,6,6,6,6,6,6,6,6	4mer,3mer,3mer,3mer,5mer,3mer,5mer,3mer,3mer,4mer,3mer,4mer,3mer,3mer,6mer,4mer,3mer,3mer,3mer,5mer,5mer,3mer,3mer,4mer,3mer,3mer,3mer	97,127,177,372,373,628,731,742,781,819,937,1009,1056,1110,1201,1202,1248,1308,1311,1339,1356,1504,1515,1571,1645,1669,1720	C,A,A,U,U,A,U,G,U,U,G,A,U,A,U,U,A,G,A,U,U,A,U,G,A,A,C	2,1,0,2,2,2,2,3,3,2,2,1,1,0,1,0,1,3,1,0,1,3,0,2,2,0,2	1,0,0,1,1,2,1,0,1,1,0,1,1,0,1,0,0,1,0,0,1,3,0,1,2,0,1	2,1,2,1,2,1,1,2,2,1,4,2,1,1,3,2,1,2,2,3,3,1,2,2,1,2,2	0,1,0,0,2,1,1,2,1,1,2,1,1,1,2,2,1,1,1,2,2,1,0,1,0,0,1	0.55,0.4,0.7,0.55,0.5,0.45,0.6,0.5,0.7,0.5,0.3,0.5,0.6,0.65,0.5,0.5,0.65,0.4,0.45,0.4,0.65,0.6,0.65,0.55,0.65,0.6,0.4
>hsa-miR-19b-1-5p	AGUUUUGCAGGUUUGCAUCCAGC	CGACCUACGUUUGGACGUUUUGA	26	6,6,6,6,6,6,7,6,6,6,6,6,6,6,6,6,6,6,6,6,6,6,6,6,6,6	5mer,5mer,2mer,5mer,3mer,3mer,6mer,5mer,3mer,5mer,3mer,4mer,3mer,4mer,4mer,2mer,4mer,4mer,3mer,4mer,4mer,6mer,5mer,4mer,3mer,4mer	40,182,390,446,451,468,556,557,572,805,1027,1047,1103,1118,1173,1180,1196,1353,1440,1568,1600,1607,1608,1650,1654,1742	U,A,A,A,A,A,C,C,A,A,G,A,A,U,C,A,A,G,A,A,G,C,C,A,U,G	1,1,2,3,1,2,3,2,2,2,2,2,2,1,1,1,2,1,1,2,1,1,1,1,2,2	1,1,2,1,1,1,1,1,1,0,1,2,1,0,1,1,2,0,0,1,1,1,0,0,1,0	1,2,2,2,3,2,2,3,3,4,2,2,1,2,1,3,3,2,3,2,3,2,4,3,3,1	0,1,1,1,1,0,1,1,3,3,1,1,0,0,1,1,2,1,1,0,1,1,4,2,1,0	0.6,0.65,0.75,0.75,0.7,0.5,0.5,0.55,0.65,0.5,0.4,0.4,0.5,0.35,0.5,0.5,0.5,0.5,0.55,0.6,0.4,0.55,0.55,0.65,0.5,0.45
>hsa-miR-29b-2-5p	CUGGUUUCACAUGGUGGCUUAG	GAUUCGGUGGUACACUUUGGUC	26	6,6,6,6,6,6,6,6,6,6,6,7,6,6,6,6,6,6,6,6,6,6,6,6,6,6	3mer,2mer,5mer,3mer,4mer,3mer,3mer,3mer,4mer,4mer,3mer,7mer,5mer,3mer,3mer,4mer,4mer,2mer,3mer,4mer,3mer,2mer,3mer,3mer,5mer,3mer	100,147,155,183,224,272,356,575,810,845,1164,1175,1176,1185,1285,1369,1404,1415,1421,1436,1604,1630,1646,1670,1697,1701	C,U,G,G,U,A,G,U,G,A,A,G,A,C,G,G,C,A,A,C,A,G,A,U,G,G	1,2,2,2,1,1,1,1,0,2,0,2,1,1,1,0,2,0,1,2,1,0,0,2,3,1	1,1,1,1,1,1,1,1,0,2,0,1,0,1,1,0,1,0,0,1,0,0,0,1,2,0	2,2,1,1,1,3,3,2,1,3,2,2,1,3,2,3,2,3,1,3,2,3,3,2,3,3	0,2,0,0,0,2,0,1,0,0,0,1,0,3,1,0,1,2,0,1,2,1,1,1,1,1	0.55,0.45,0.6,0.55,0.45,0.4,0.45,0.6,0.45,0.8,0.55,0.55,0.5,0.5,0.4,0.35,0.45,0.55,0.45,0.5,0.5,0.6,0.65,0.6,0.55,0.6
>hsa-miR-122-5p	UGGAGUGUGACAAUGGUGUUUG	GUUUGUGGUAACAGUGUGAGGU	26	6,6,7,6,6,6,6,6,6,6,6,6,6,6,6,6,6,6,6,6,6,6,6,6,6,6	4mer,4mer,6mer,4mer,5mer,2mer,5mer,4mer,4mer,3mer,4mer,2mer,3mer,4mer,5mer,3mer,5mer,4mer,4mer,3mer,2mer,3mer,3mer,2mer,3mer,4mer	43,229,240,241,256,281,284,285,286,478,679,878,899,961,983,1032,1121,1129,1131,1218,1454,1460,1518,1613,1620,1725	U,C,C,A,U,U,C,C,C,A,G,U,U,G,A,C,C,C,C,G,A,G,U,A,A,U	1,0,0,1,1,1,1,2,2,1,2,2,2,2,2,1,2,2,0,2,2,2,1,0,2,2	1,0,0,1,1,1,0,1,2,0,2,2,2,1,1,1,1,1,0,2,1,1,1,0,2,2	3,1,2,2,2,1,3,2,1,1,2,3,1,2,2,2,1,1,1,2,2,2,2,1,1,3	1,1,1,1,1,1,3,1,1,0,1,1,0,0,0,1,1,1,1,0,1,1,1,0,1,1	0.6,0.45,0.35,0.3,0.3,0.5,0.45,0.5,0.5,0.6,0.55,0.4,0.5,0.45,0.5,0.4,0.4,0.4,0.4,0.5,0.55,0.45,0.6,0.7,0.6,0.45
>hsa-miR-148b-5p	AAGUUCUGUUAUACACUCAGGC	CGGACUCACAUAUUGUCUUGAA	26	6,6,6,6,6,6,6,6,6,6,6,6,6,6,6,6,6,6,6,6,6,6,6,6,6,6	2mer,4mer,3mer,2mer,5mer,4mer,2mer,3mer,5mer,4mer,3mer,4mer,3mer,4mer,6mer,3mer,3mer,3mer,4mer,3mer,2mer,4mer,3mer,3mer,4mer,4mer	105,202,373,400,572,607,663,689,696,708,810,997,1019,1088,1104,1161,1162,1203,1254,1340,1341,1477,1516,1540,1573,1596	G,C,U,G,A,G,U,A,U,A,G,G,C,C,G,U,C,U,G,U,A,G,U,G,G,A	1,3,3,2,2,3,1,2,1,2,2,1,1,2,4,2,2,3,3,3,3,2,3,1,2,2	1,2,1,1,1,1,1,1,0,1,2,1,0,1,1,2,2,1,1,1,2,2,1,0,1,0	1,1,0,0,0,2,0,0,2,1,2,0,1,0,1,3,2,1,1,2,2,1,1,0,1,0	1,1,0,0,0,1,0,0,2,1,2,0,1,0,1,2,1,1,1,1,1,1,1,0,1,0	0.5,0.65,0.5,0.55,0.65,0.55,0.45,0.6,0.45,0.5,0.45,0.35,0.3,0.5,0.55,0.7,0.65,0.45,0.55,0.45,0.4,0.3,0.6,0.35,0.6,0.55
>hsa-miR-193b-5p	CGGGGUUUUGAGGGCGAGAUGA	AGUAGAGCGGGAGUUUUGGGGC	26	6,6,6,6,6,6,6,6,7,6,6,6,6,6,6,7,6,6,6,6,7,6,6,6,7,6	3mer,3mer,5mer,5mer,3mer,3mer,3mer,3mer,3mer,2mer,3mer,5mer,4mer,4mer,6mer,4mer,3mer,2mer,3mer,4mer,3mer,4mer,4mer,3mer,6mer,5mer	42,99,100,101,204,272,336,558,559,590,659,714,721,812,989,1121,1122,1187,1284,1285,1405,1487,1488,1610,1611,1612	U,A,C,A,U,A,U,C,A,C,A,A,A,U,A,C,C,A,A,G,A,C,A,U,U,C	2,3,2,1,1,3,3,1,2,3,1,1,2,1,4,1,3,0,3,2,1,2,2,2,2,2	1,2,1,0,0,3,0,1,2,2,1,1,1,0,4,1,1,0,2,1,0,1,0,2,1,1	2,2,2,3,2,3,2,2,3,1,1,2,1,2,1,1,1,1,2,2,1,2,2,0,1,1	1,1,0,1,1,2,1,0,1,0,1,1,0,2,1,1,1,1,1,1,0,1,1,0,1,1	0.6,0.6,0.55,0.55,0.65,0.4,0.55,0.55,0.6,0.55,0.5,0.45,0.5,0.45,0.6,0.4,0.45,0.55,0.4,0.4,0.5,0.55,0.5,0.6,0.65,0.7
>hsa-miR-642a-5p	GUCCCUCUCCAAAUGUGUCUUG	GUUCUGUGUAAACCUCUCCCUG	26	6,6,6,6,6,6,6,6,6,6,6,6,6,6,6,6,6,6,6,7,6,6,6,6,6,6	5mer,4mer,5mer,3mer,3mer,2mer,5mer,3mer,4mer,2mer,4mer,3mer,5mer,4mer,4mer,3mer,3mer,4mer,3mer,6mer,2mer,5mer,4mer,4mer,2mer,3mer	132,138,158,198,861,1004,1052,1084,1108,1111,1199,1200,1201,1247,1328,1329,1330,1333,1334,1356,1379,1399,1503,1514,1665,1719	C,U,C,A,A,G,U,A,A,U,A,A,U,C,G,G,G,A,A,U,G,A,U,C,A,U	1,2,2,1,1,1,0,0,1,0,1,0,1,1,1,1,2,1,2,1,2,0,0,1,2,0	1,2,2,1,1,1,0,0,1,0,1,0,1,1,1,1,1,1,1,1,2,0,0,1,2,0	2,2,1,2,2,2,1,1,3,3,2,2,2,1,2,2,1,2,2,3,1,2,2,3,3,1	1,1,1,1,1,1,1,1,0,3,2,2,1,1,0,1,0,1,1,1,1,1,2,0,2,1	0.4,0.55,0.65,0.65,0.5,0.45,0.55,0.45,0.65,0.65,0.5,0.55,0.5,0.65,0.45,0.45,0.5,0.65,0.55,0.65,0.3,0.5,0.55,0.6,0.6,0.45
>hsa-miR-9-5p	UCUUUGGUUAUCUAGCUGUAUGA	AGUAUGUCGAUCUAUUGGUUUCU	25	6,6,6,6,7,6,6,6,6,6,7,6,6,6,6,6,7,6,6,6,6,6,6,6,6	3mer,3mer,3mer,3mer,5mer,6mer,3mer,3mer,5mer,2mer,4mer,5mer,2mer,2mer,3mer,3mer,6mer,3mer,4mer,4mer,3mer,3mer,6mer,6mer,4mer	358,384,395,466,490,563,624,706,804,1016,1178,1191,1323,1418,1428,1445,1472,1500,1509,1529,1589,1625,1640,1740,1762	C,U,A,A,U,U,U,A,G,U,A,A,A,C,A,G,A,U,A,C,C,A,A,A,C	2,3,1,3,1,1,2,2,2,2,2,1,3,3,2,2,1,2,3,0,2,1,2,1,2	1,2,1,1,0,1,1,1,1,2,1,0,1,2,1,1,1,1,1,0,1,1,1,1,1	4,1,2,0,2,1,1,1,2,2,1,0,2,2,1,1,3,2,2,2,2,3,2,2,1	2,1,1,0,1,1,1,1,1,0,0,0,1,1,1,0,2,1,1,1,2,1,2,1,0	0.5,0.6,0.7,0.6,0.5,0.75,0.5,0.7,0.55,0.4,0.5,0.5,0.3,0.45,0.55,0.6,0.55,0.6,0.5,0.4,0.6,0.55,0.5,0.45,0.45
>hsa-miR-136-3p	CAUCAUCGUCUCAAAUGAGUCU	UCUGAGUAAACUCUGCUACUAC	24	6,6,6,6,6,6,6,6,6,6,6,6,6,6,6,6,6,6,6,6,6,6,6,6	5mer,4mer,5mer,5mer,4mer,5mer,4mer,5mer,5mer,6mer,5mer,4mer,6mer,3mer,3mer,5mer,3mer,4mer,3mer,4mer,2mer,4mer,4mer,4mer	54,190,193,379,502,517,520,529,532,742,745,772,850,871,951,1057,1153,1235,1274,1504,1543,1561,1720,1748	C,G,A,C,G,G,C,G,G,G,C,A,G,C,U,C,C,C,C,A,C,G,C,G	1,2,2,2,0,2,2,1,1,0,3,1,2,1,3,3,2,2,1,1,2,1,2,2	0,1,2,1,0,1,1,1,1,0,3,1,1,1,1,2,1,1,1,1,2,1,1,1	2,1,2,1,2,1,1,2,2,2,3,2,2,2,1,0,2,1,3,1,1,3,0,1	1,0,1,0,1,0,1,1,1,1,3,1,2,2,1,0,1,1,2,1,0,2,0,1	0.65,0.5,0.65,0.45,0.55,0.45,0.55,0.5,0.45,0.5,0.6,0.6,0.65,0.55,0.3,0.55,0.55,0.55,0.55,0.6,0.3,0.5,0.4,0.6
>hsa-miR-382-3p	AAUCAUUCACGGACAACACUU	UUCACAACAGGCACUUACUAA	24	7,6,6,6,6,6,6,6,6,6,6,6,6,6,6,6,6,6,6,6,7,6,7,6	7mer,2mer,3mer,4mer,3mer,2mer,6mer,3mer,5mer,5mer,5mer,3mer,4mer,4mer,6mer,5mer,4mer,3mer,4mer,6mer,4mer,2mer,4mer,6mer	54,86,124,190,410,475,517,689,742,764,912,913,1056,1057,1150,1151,1234,1235,1293,1395,1504,1543,1720,1745	C,C,G,G,U,U,G,A,G,C,U,U,U,C,U,A,U,C,C,G,A,C,C,G	2,2,2,1,2,1,2,2,2,2,1,2,1,2,3,2,2,1,2,3,2,2,1,2	0,1,1,0,1,1,1,1,0,1,1,1,1,1,1,1,1,1,1,3,2,1,1,2	2,3,0,0,1,0,0,0,2,1,0,1,0,0,0,2,1,1,0,0,1,0,0,2	1,3,0,0,1,0,0,0,2,1,0,1,0,0,0,2,1,1,0,0,1,0,0,2	0.65,0.55,0.45,0.5,0.7,0.45,0.45,0.6,0.5,0.6,0.5,0.4,0.6,0.55,0.5,0.5,0.6,0.55,0.5,0.3,0.6,0.3,0.4,0.45
>hsa-miR-625-5p	AGGGGGAAAGUUCUAUAGUCC	CCUGAUAUCUUGAAAGGGGGA	24	6,6,6,6,6,6,6,6,6,6,6,6,6,6,6,6,6,6,6,6,6,6,6,6	3mer,4mer,3mer,3mer,6mer,4mer,3mer,3mer,3mer,4mer,2mer,4mer,3mer,3mer,4mer,4mer,3mer,5mer,5mer,3mer,3mer,5mer,3mer,3mer	230,231,259,260,262,263,283,287,288,289,290,594,621,702,902,1035,1040,1043,1125,1132,1522,1555,1725,1726	C,G,C,C,U,C,U,U,C,C,A,A,A,A,G,A,C,A,U,G,A,G,U,C	2,3,1,1,2,1,2,1,1,3,2,3,2,2,3,2,1,1,2,1,2,2,3,2	2,1,0,0,1,1,1,1,1,3,1,1,2,1,1,2,1,1,2,1,1,0,1,0	2,2,3,1,2,2,1,1,1,1,2,1,2,2,3,2,3,2,3,1,3,1,3,2	1,1,2,0,1,1,1,1,1,1,2,1,1,2,1,2,1,1,3,1,2,0,1,1	0.4,0.4,0.45,0.45,0.5,0.5,0.5,0.6,0.55,0.55,0.5,0.45,0.5,0.6,0.45,0.45,0.35,0.45,0.55,0.35,0.5,0.4,0.45,0.45
>hsa-miR-185-5p	UGGAGAGAAAGGCAGUUCCUGA	AGUCCUUGACGGAAAGAGAGGU	23	6,6,6,6,6,6,6,6,6,6,6,6,6,6,6,6,6,6,6,6,6,6,6	2mer,5mer,5mer,4mer,4mer,3mer,6mer,4mer,4mer,4mer,3mer,2mer,3mer,3mer,5mer,3mer,4mer,4mer,5mer,4mer,3mer,4mer,4mer	69,111,229,231,259,284,286,287,288,290,667,701,899,1039,1062,1092,1131,1460,1462,1463,1465,1468,1522	C,U,C,G,C,C,C,U,C,A,A,C,U,C,U,A,C,G,U,C,G,A,A	3,2,0,0,2,3,2,2,2,2,1,1,1,1,1,0,2,4,2,3,2,3,0	2,1,0,0,1,2,1,0,1,2,1,0,0,0,0,0,2,4,0,1,1,2,0	2,1,2,1,2,1,1,2,1,3,1,3,3,2,2,1,3,2,2,1,2,2,2	2,1,1,1,1,1,1,2,1,1,1,3,2,1,1,0,3,0,2,1,1,1,1	0.6,0.6,0.45,0.4,0.45,0.45,0.5,0.6,0.55,0.5,0.45,0.65,0.5,0.4,0.5,0.55,0.4,0.45,0.5,0.55,0.55,0.65,0.5
>hsa-miR-29a-5p	ACUGAUUUCUUUUGGUGUUCAG	GACUUGUGGUUUUCUUUAGUCA	22	6,7,6,6,6,6,6,6,6,6,6,6,6,6,6,7,6,6,6,6,6,6	3mer,7mer,4mer,2mer,4mer,3mer,3mer,3mer,4mer,3mer,2mer,3mer,2mer,3mer,3mer,6mer,4mer,4mer,5mer,4mer,4mer,3mer	155,184,248,315,409,433,453,470,550,568,579,794,867,1105,1176,1238,1277,1286,1370,1478,1631,1702	G,A,C,U,U,A,A,U,C,A,C,U,U,G,A,U,A,G,C,C,U,G	2,3,0,1,1,1,3,1,1,1,3,0,3,2,4,3,2,3,4,2,2,3	1,0,0,1,0,1,3,1,0,1,3,0,1,1,2,1,0,1,2,2,2,3	2,2,2,1,2,3,2,4,2,2,3,4,2,3,3,2,2,2,3,2,2,3	1,1,1,1,1,1,1,0,0,1,2,1,1,1,1,2,0,1,0,1,0,0	0.6,0.6,0.3,0.5,0.7,0.85,0.65,0.55,0.5,0.8,0.55,0.6,0.5,0.55,0.5,0.6,0.55,0.5,0.35,0.35,0.65,0.65
>hsa-miR-145-3p	GGAUUCCUGGAAAUACUGUUCU	UCUUGUCAUAAAGGUCCUUAGG	22	6,6,6,6,6,6,6,7,6,7,6,6,6,6,6,6,6,6,6,6,6,6	4mer,3mer,5mer,5mer,5mer,4mer,3mer,6mer,4mer,6mer,4mer,5mer,2mer,3mer,4mer,5mer,4mer,5mer,4mer,5mer,3mer,3mer	305,400,763,809,864,865,1054,1162,1163,1203,1204,1236,1275,1291,1341,1367,1368,1393,1403,1476,1551,1721	U,G,U,U,C,G,A,C,A,U,G,A,A,A,A,C,U,A,C,U,C,C	2,0,3,1,0,1,1,3,2,0,0,1,2,2,0,3,2,2,0,1,2,1	1,0,2,1,0,0,1,3,1,0,0,1,1,1,0,3,2,2,0,1,1,1	1,1,3,1,1,2,1,2,1,1,2,1,1,2,2,2,3,1,3,2,2,1	0,1,1,1,1,1,1,1,1,0,1,1,1,1,1,1,1,0,2,1,1,0	0.6,0.55,0.65,0.45,0.45,0.55,0.55,0.65,0.65,0.45,0.5,0.55,0.6,0.55,0.4,0.35,0.4,0.45,0.45,0.35,0.4,0.4
>hsa-miR-193a-5p	UGGGUCUUUGCGGGCGAGAUGA	AGUAGAGCGGGCGUUUCUGGGU	22	6,6,6,6,6,6,6,6,7,6,6,6,6,6,6,6,6,6,6,6,6,6	2mer,3mer,4mer,2mer,2mer,3mer,2mer,2mer,5mer,4mer,4mer,2mer,3mer,4mer,2mer,4mer,4mer,3mer,4mer,4mer,4mer,2mer	42,98,99,204,336,361,381,558,678,679,747,809,1058,1073,1284,1451,1476,1487,1518,1610,1629,1685	U,C,A,U,U,A,A,C,U,G,G,U,U,A,A,U,U,C,U,U,A,U	3,2,2,1,3,1,2,1,3,3,3,3,2,3,2,2,3,3,2,3,2,2	1,2,0,0,0,1,1,1,1,1,1,2,1,0,0,1,2,2,1,3,1,1	2,3,2,2,2,0,1,2,3,2,2,2,1,2,2,2,3,2,1,0,2,3	1,1,1,1,1,0,1,0,2,1,1,0,1,0,1,1,1,1,0,0,1,2	0.6,0.55,0.6,0.65,0.55,0.55,0.55,0.55,0.5,0.55,0.6,0.45,0.55,0.55,0.4,0.65,0.35,0.55,0.6,0.6,0.65,0.7
>hsa-miR-208b-5p	AAGCUUUUUGCUCGAAUUAUGU	UGUAUUAAGCUCGUUUUUCGAA	22	6,6,6,6,6,6,6,6,6,6,6,6,6,6,6,6,6,6,6,6,6,6	4mer,5mer,5mer,3mer,4mer,3mer,2mer,3mer,5mer,2mer,3mer,2mer,5mer,3mer,2mer,3mer,4mer,3mer,2mer,2mer,4mer,2mer	41,224,225,373,492,536,537,677,845,858,997,1019,1260,1283,1340,1369,1413,1447,1477,1516,1603,1671	C,U,C,U,C,U,A,C,A,G,G,C,C,C,U,G,G,A,G,U,A,G	3,3,2,2,2,1,3,0,3,3,2,0,2,3,3,1,2,0,2,2,4,3	2,2,0,0,2,1,0,0,1,1,2,0,1,2,1,0,2,0,1,1,4,1	2,0,0,1,2,2,2,3,3,0,0,1,1,1,2,1,0,1,3,1,2,1	1,0,0,1,1,2,2,2,2,0,0,1,1,1,1,0,0,0,1,0,1,1	0.6,0.45,0.35,0.5,0.45,0.55,0.5,0.5,0.8,0.45,0.35,0.3,0.5,0.45,0.45,0.35,0.5,0.6,0.3,0.6,0.5,0.55
>hsa-miR-2110	UUGGGGAAACGGCCGCUGAGUG	GUGAGUCGCCGGCAAAGGGGUU	22	6,6,6,6,6,6,7,6,6,6,6,6,6,6,6,6,6,6,6,6,6,6	2mer,5mer,5mer,3mer,4mer,4mer,4mer,2mer,3mer,2mer,2mer,6mer,6mer,3mer,3mer,3mer,3mer,2mer,4mer,3mer,2mer,3mer	113,232,233,525,622,703,902,982,1022,1023,1036,1042,1124,1156,1208,1373,1469,1523,1554,1637,1638,1728	A,G,G,U,G,G,G,C,A,G,U,C,C,G,G,G,A,C,U,A,A,G	1,2,1,0,2,1,2,1,2,1,2,2,1,2,1,0,3,1,2,2,2,0	0,1,1,0,1,1,1,0,1,1,2,2,0,1,1,0,1,1,1,1,1,0	1,1,1,1,2,2,3,3,3,2,1,1,1,1,2,2,1,2,2,2,1,2	1,1,1,1,2,1,1,1,2,1,1,1,1,1,1,1,0,1,1,1,1,1	0.5,0.5,0.45,0.6,0.45,0.6,0.45,0.45,0.35,0.3,0.4,0.4,0.55,0.65,0.6,0.5,0.55,0.45,0.45,0.6,0.5,0.5
>hsa-miR-4524b-5p	AUAGCAGCAUAAGCCUGUCUC	CUCUGUCCGAAUACGACGAUA	22	6,6,6,6,6,6,6,6,6,6,7,6,6,6,6,6,6,6,6,6,7,6	2mer,4mer,3mer,2mer,5mer,5mer,3mer,5mer,5mer,3mer,6mer,5mer,5mer,3mer,5mer,5mer,4mer,4mer,5mer,4mer,6mer,3mer	347,415,462,773,814,815,956,962,963,969,1142,1143,1223,1316,1481,1482,1559,1562,1577,1749,1752,1756	A,U,C,U,G,G,C,G,C,U,A,A,A,A,A,G,A,C,U,C,U,U	2,2,2,3,1,1,2,2,0,0,1,1,2,1,1,2,2,2,1,2,3,0	2,1,2,2,1,1,2,1,0,0,1,0,2,1,1,2,2,2,1,2,2,0	2,1,3,1,0,1,3,3,3,1,1,1,2,3,0,0,2,2,0,0,1,2	1,0,2,1,0,1,1,2,1,0,1,1,1,2,0,0,1,1,0,0,1,1	0.65,0.75,0.55,0.6,0.4,0.45,0.4,0.45,0.5,0.4,0.6,0.55,0.6,0.5,0.45,0.45,0.5,0.55,0.6,0.7,0.8,0.6
>hsa-miR-326	CCUCUGGGCCCUUCCUCCAG	GACCUCCUUCCCGGGUCUCC	21	6,6,6,6,6,6,6,6,7,6,6,6,6,6,6,6,6,7,6,6,6	5mer,3mer,5mer,4mer,5mer,4mer,4mer,4mer,7mer,4mer,3mer,3mer,3mer,6mer,3mer,4mer,4mer,7mer,5mer,3mer,5mer	94,234,245,563,625,626,661,671,706,740,751,905,1135,1178,1288,1376,1430,1500,1590,1640,1711	A,C,C,U,G,A,C,A,A,A,U,G,G,A,A,U,A,U,A,A,U	1,1,0,1,0,0,1,1,1,1,2,0,1,2,1,1,0,0,0,2,3	0,1,0,1,0,0,1,0,1,0,1,0,1,2,1,1,0,0,0,2,3	2,2,3,3,1,1,0,1,1,4,2,3,1,3,1,3,2,1,0,1,2	1,1,2,2,1,1,0,1,0,4,0,2,1,1,0,1,1,1,0,1,2	0.55,0.45,0.3,0.75,0.5,0.55,0.5,0.5,0.7,0.5,0.65,0.55,0.4,0.5,0.6,0.5,0.6,0.6,0.65,0.5,0.45
>hsa-miR-17-3p	ACUGCAGUGAAGGCACUUGUAG	GAUGUUCACGGAAGUGACGUCA	20	6,6,6,6,6,6,6,6,6,6,6,6,6,6,6,6,6,6,6,6	4mer,4mer,3mer,6mer,3mer,5mer,4mer,5mer,4mer,4mer,4mer,3mer,4mer,3mer,4mer,4mer,4mer,3mer,4mer,4mer	368,404,585,611,684,794,815,962,963,1014,1142,1209,1313,1374,1532,1535,1659,1660,1716,1752	A,A,C,A,U,U,G,G,C,A,A,U,C,G,C,C,G,G,U,U	1,0,2,0,1,3,1,2,0,0,1,1,0,1,2,1,0,1,1,2	1,0,2,0,0,2,1,1,0,0,1,0,0,0,1,1,0,1,1,0	0,1,2,2,2,1,0,3,2,1,2,1,2,1,1,1,1,0,2,0	0,1,1,2,2,1,0,1,1,1,1,1,2,1,1,1,1,0,1,0	0.55,0.55,0.6,0.55,0.65,0.6,0.45,0.45,0.5,0.4,0.6,0.6,0.45,0.5,0.4,0.4,0.4,0.5,0.45,0.8
>hsa-miR-24-3p	UGGCUCAGUUCAGCAGGAACAG	GACAAGGACGACUUGACUCGGU	20	6,6,6,6,6,6,6,6,6,7,6,6,6,6,6,7,6,6,6,6	4mer,4mer,4mer,5mer,6mer,5mer,5mer,5mer,3mer,3mer,3mer,2mer,3mer,4mer,6mer,7mer,4mer,2mer,3mer,3mer	85,255,587,603,825,826,874,895,940,945,1018,1071,1260,1275,1295,1485,1486,1633,1731,1748	U,C,U,A,U,G,U,U,G,U,U,U,C,A,A,C,C,U,G,G	2,3,2,1,3,2,3,3,3,3,3,0,3,2,3,2,1,2,0,2	1,1,1,1,1,2,1,1,1,2,1,0,1,1,1,1,0,1,0,2	1,2,1,1,0,3,1,1,3,2,1,2,0,2,1,1,1,1,3,0	1,1,0,1,0,3,0,1,2,1,1,1,0,2,1,1,0,0,2,0	0.5,0.25,0.55,0.45,0.6,0.6,0.4,0.4,0.25,0.4,0.4,0.6,0.5,0.6,0.5,0.55,0.5,0.6,0.6,0.6
>hsa-miR-33a-5p	GUGCAUUGUAGUUGCAUUGCA	ACGUUACGUUGAUGUUACGUG	20	6,6,6,6,7,6,6,6,6,7,6,6,6,6,6,6,6,6,6,6	3mer,3mer,4mer,3mer,4mer,3mer,4mer,3mer,2mer,6mer,5mer,2mer,2mer,2mer,4mer,5mer,4mer,3mer,4mer,5mer	128,360,403,427,474,565,610,634,673,793,794,907,1099,1214,1421,1564,1565,1596,1658,1674	G,C,A,A,U,C,C,G,G,G,U,A,G,A,A,A,G,A,A,A	2,2,2,2,2,2,1,3,2,3,2,1,2,1,3,2,1,2,2,2	1,1,1,1,1,1,1,1,1,3,2,1,1,0,1,1,0,1,1,0	1,2,2,1,1,1,3,2,0,2,2,1,1,1,2,2,2,1,3,2	1,1,1,0,1,1,1,1,0,1,1,0,1,0,1,1,2,1,2,1	0.4,0.55,0.55,0.75,0.5,0.65,0.55,0.4,0.5,0.55,0.6,0.55,0.45,0.55,0.45,0.5,0.5,0.55,0.45,0.65
>hsa-miR-34a-5p	UGGCAGUGUCUUAGCUGGUUGU	UGUUGGUCGAUUCUGUGACGGU	20	6,6,6,6,6,6,6,7,6,7,6,7,6,6,6,6,6,6,6,6	4mer,4mer,5mer,4mer,3mer,4mer,4mer,4mer,2mer,6mer,3mer,6mer,4mer,4mer,4mer,5mer,4mer,5mer,4mer,3mer	241,285,611,634,663,701,813,878,899,961,1031,1129,1130,1207,1221,1372,1463,1468,1480,1544	A,C,A,G,U,C,G,U,U,G,C,C,C,A,C,A,C,A,G,G	3,1,3,3,2,2,4,2,2,1,2,0,0,4,3,3,0,1,4,3	1,1,1,2,1,1,2,0,0,1,1,0,0,2,1,1,0,0,4,1	1,0,1,1,2,2,2,1,3,1,1,1,3,2,1,1,2,1,2,0	1,0,0,1,1,1,2,1,1,1,0,1,2,2,1,1,2,0,1,0	0.3,0.5,0.55,0.4,0.45,0.65,0.4,0.4,0.5,0.45,0.4,0.4,0.35,0.55,0.5,0.45,0.55,0.65,0.35,0.35
>hsa-miR-182-5p	UUUGGCAAUGGUAGAACUCACACU	UCACACUCAAGAUGGUAACGGUUU	20	6,6,6,6,6,6,6,6,6,6,6,6,7,6,6,6,6,6,6,6	3mer,4mer,6mer,5mer,5mer,3mer,5mer,3mer,3mer,5mer,6mer,3mer,6mer,3mer,5mer,5mer,6mer,6mer,4mer,4mer	324,405,463,464,642,669,703,704,802,880,957,1144,1209,1224,1374,1375,1422,1470,1471,1660	U,U,A,A,C,U,G,A,A,G,U,A,U,C,G,G,C,A,G,G	3,2,3,2,4,1,2,3,1,3,3,1,1,2,1,2,3,2,3,2	1,1,0,1,2,1,1,2,1,2,1,1,0,1,1,1,2,1,1,1	2,0,1,1,1,1,2,1,1,1,2,1,0,1,0,0,0,2,3,1	1,0,1,1,1,1,1,1,0,0,2,1,0,1,0,0,0,1,3,1	0.7,0.6,0.55,0.55,0.4,0.45,0.6,0.65,0.5,0.35,0.35,0.5,0.6,0.6,0.5,0.45,0.5,0.55,0.5,0.5
>hsa-miR-136-5p	ACUCCAUUUGUUUUGAUGAUGGA	AGGUAGUAGUUUUGUUUACCUCA	20	6,6,6,6,6,6,6,6,6,6,6,6,6,6,6,6,6,6,6,6	5mer,5mer,4mer,3mer,2mer,4mer,5mer,3mer,4mer,5mer,5mer,4mer,5mer,3mer,3mer,6mer,4mer,4mer,4mer,5mer	368,410,503,533,674,794,862,892,908,913,1085,1110,1232,1258,1330,1347,1396,1548,1664,1716	A,U,A,G,A,U,U,C,U,U,C,A,A,C,G,C,G,U,A,U	2,3,3,1,1,1,3,3,1,3,2,2,1,2,3,3,2,3,1,2	1,2,2,1,1,1,2,0,0,0,1,1,1,1,1,2,0,1,0,1	3,1,1,1,1,2,2,3,1,2,2,2,2,2,2,2,2,2,3,1	1,1,0,0,0,1,1,0,0,1,1,1,0,1,1,1,1,0,2,0	0.55,0.7,0.6,0.45,0.5,0.6,0.5,0.4,0.45,0.4,0.45,0.65,0.6,0.5,0.5,0.45,0.3,0.4,0.55,0.45
>hsa-miR-154-5p	UAGGUUAUCCGUGUUGCCUUCG	GCUUCCGUUGUGCCUAUUGGAU	20	6,6,6,6,6,6,6,6,7,6,6,6,6,6,6,6,6,6,6,6	6mer,4mer,3mer,2mer,3mer,6mer,3mer,6mer,4mer,5mer,3mer,2mer,2mer,4mer,2mer,3mer,2mer,3mer,3mer,3mer	117,507,588,696,697,713,714,719,747,810,879,940,1059,1119,1218,1452,1477,1684,1686,1723	G,G,C,U,U,U,A,A,G,G,G,G,C,C,G,U,G,C,A,C	1,2,1,1,2,2,2,1,2,1,2,3,2,1,2,2,1,2,2,2	1,1,1,0,2,1,1,1,1,1,1,2,1,1,1,1,1,1,0,1	1,2,3,4,2,2,1,3,1,2,4,3,2,2,3,2,1,3,2,3	1,2,2,2,1,1,1,1,0,0,1,0,2,0,1,2,0,1,1,1	0.55,0.6,0.55,0.45,0.5,0.5,0.45,0.5,0.6,0.45,0.35,0.25,0.55,0.35,0.5,0.55,0.3,0.65,0.75,0.4
>hsa-miR-188-5p	CAUCCCUUGCAUGGUGGAGGG	GGGAGGUGGUACGUUCCCUAC	20	6,6,6,6,6,6,6,6,6,6,6,6,6,6,6,6,6,6,6,6	4mer,3mer,2mer,4mer,4mer,3mer,3mer,2mer,6mer,4mer,3mer,3mer,6mer,4mer,3mer,6mer,3mer,6mer,4mer,3mer	139,140,410,781,820,847,858,913,1053,1110,1112,1202,1290,1357,1358,1400,1504,1664,1671,1720	U,G,U,U,G,G,G,U,G,A,A,U,G,U,C,A,A,A,G,C	2,2,2,2,3,2,1,3,0,2,1,2,2,1,0,1,0,3,1,1	1,1,2,1,2,1,0,2,0,1,1,1,1,0,0,1,0,3,0,1	2,2,2,2,3,2,3,2,2,2,2,2,1,2,1,2,1,2,2,1	2,2,1,1,3,0,1,1,1,2,2,1,0,0,0,1,1,2,2,1	0.55,0.5,0.7,0.7,0.5,0.7,0.45,0.4,0.55,0.65,0.55,0.5,0.55,0.65,0.55,0.45,0.6,0.55,0.55,0.4
>hsa-miR-34c-5p	AGGCAGUGUAGUUAGCUGAUUGC	CGUUAGUCGAUUGAUGUGACGGA	20	6,6,6,6,6,6,6,7,6,7,6,7,6,6,6,6,6,6,6,6	4mer,4mer,5mer,4mer,3mer,4mer,4mer,4mer,2mer,6mer,3mer,6mer,4mer,4mer,4mer,5mer,4mer,5mer,4mer,3mer	241,285,611,634,663,701,813,878,899,961,1031,1129,1130,1207,1221,1372,1463,1468,1480,1544	A,C,A,G,U,C,G,U,U,G,C,C,C,A,C,A,C,A,G,G	2,2,2,3,1,2,2,2,2,2,2,1,1,2,2,2,1,3,2,2	1,1,1,1,1,1,1,0,0,1,1,1,1,1,1,1,1,2,1,1	1,1,3,2,1,3,3,2,3,2,2,0,0,1,1,2,1,2,3,1	1,1,2,1,1,3,2,1,1,0,2,0,0,0,1,1,1,1,2,1	0.3,0.5,0.55,0.4,0.45,0.65,0.4,0.4,0.5,0.45,0.4,0.4,0.35,0.55,0.5,0.45,0.55,0.65,0.35,0.35
>hsa-miR-378a-5p	CUCCUGACUCCAGGUCCUGUGU	UGUGUCCUGGACCUCAGUCCUC	20	6,6,6,6,6,6,6,6,6,6,6,6,6,6,6,6,6,6,6,6	4mer,4mer,4mer,3mer,5mer,2mer,2mer,4mer,3mer,4mer,4mer,5mer,4mer,5mer,5mer,3mer,3mer,4mer,4mer,3mer	95,131,137,498,552,776,870,906,934,1007,1097,1159,1168,1279,1288,1289,1346,1364,1376,1390	A,A,G,U,A,C,G,A,G,G,C,A,G,A,A,U,G,A,U,A	1,1,2,1,2,2,1,1,2,4,1,1,1,3,1,0,2,2,0,3	1,1,1,1,1,2,1,1,2,3,1,1,1,2,1,0,2,2,0,2	2,1,2,2,3,3,3,3,2,2,3,2,1,1,1,1,2,1,2,2	0,0,1,1,2,1,2,1,1,1,2,1,1,0,1,1,2,0,1,0	0.55,0.45,0.55,0.5,0.65,0.6,0.5,0.55,0.25,0.45,0.45,0.75,0.55,0.5,0.6,0.5,0.35,0.45,0.5,0.45
>hsa-miR-664a-3p	UAUUCAUUUAUCCCCAGCCUACA	ACAUCCGACCCCUAUUUACUUAU	20	6,6,6,6,6,6,6,6,6,6,6,6,6,7,6,6,6,6,6,6	2mer,3mer,5mer,4mer,3mer,5mer,3mer,4mer,4mer,4mer,5mer,4mer,3mer,6mer,3mer,5mer,6mer,4mer,4mer,3mer	475,485,533,674,689,696,795,863,909,1057,1151,1202,1231,1235,1239,1258,1396,1475,1571,1681	U,C,G,A,A,U,U,U,G,C,A,U,G,C,A,C,G,C,G,A	1,1,0,1,1,2,2,2,2,2,2,2,1,3,4,2,2,1,2,2	0,1,0,1,0,2,2,0,1,1,1,1,1,2,3,1,0,0,1,1	0,2,1,1,0,1,1,1,1,0,1,1,1,1,1,2,1,1,1,2	0,2,1,1,0,1,1,1,1,0,1,1,1,1,1,1,1,1,1,2	0.45,0.55,0.45,0.5,0.6,0.45,0.6,0.45,0.45,0.55,0.5,0.5,0.65,0.55,0.6,0.5,0.3,0.3,0.55,0.6
>hsa-miR-550b-2-5p	AUGUGCCUGAGGGAGUAAGACA	ACAGAAUGAGGGAGUCCGUGUA	20	6,6,6,6,6,6,6,7,6,6,6,6,6,6,6,6,6,6,6,6	3mer,3mer,4mer,4mer,3mer,5mer,3mer,7mer,4mer,2mer,4mer,4mer,3mer,3mer,3mer,4mer,3mer,3mer,5mer,3mer	134,160,162,180,201,238,355,362,375,434,487,538,567,629,1010,1028,1438,1450,1593,1649	G,C,U,U,U,C,A,C,U,U,A,C,G,G,G,G,A,C,G,C	2,1,1,0,0,3,2,0,0,2,3,1,2,2,1,3,0,1,2,0	1,1,1,0,0,2,0,0,0,0,2,0,2,2,1,1,0,1,1,0	1,2,1,1,2,3,2,1,2,2,3,2,2,2,2,2,2,2,2,1	1,1,0,1,0,1,1,1,1,1,1,1,1,1,1,0,2,2,1,1	0.45,0.65,0.65,0.7,0.7,0.3,0.5,0.5,0.5,0.85,0.55,0.5,0.7,0.4,0.4,0.4,0.55,0.6,0.55,0.65
>hsa-miR-33a-3p	CAAUGUUUCCACAGUGCAUCAC	CACUACGUGACACCUUUGUAAC	19	6,6,6,6,6,6,6,6,6,6,6,6,6,6,6,6,6,6,6	6mer,5mer,3mer,3mer,4mer,4mer,5mer,3mer,3mer,4mer,5mer,5mer,3mer,3mer,4mer,4mer,2mer,3mer,3mer	149,203,226,227,278,297,313,400,471,514,577,616,698,828,875,896,897,1090,1151	A,C,U,C,C,G,A,G,G,G,A,U,G,U,G,U,C,U,A	3,2,1,1,1,1,1,1,0,0,1,2,1,1,1,3,3,3,2	3,1,1,1,1,1,1,1,0,0,1,2,1,1,1,3,2,3,2	1,2,1,1,1,2,2,2,1,2,2,2,2,1,3,2,2,2,1	0,1,1,1,1,1,1,2,0,0,0,1,0,0,1,0,0,2,1	0.4,0.65,0.4,0.35,0.45,0.4,0.5,0.55,0.5,0.45,0.55,0.4,0.5,0.65,0.35,0.35,0.35,0.45,0.5
>hsa-miR-134-5p	UGUGACUGGUUGACCAGAGGGG	GGGGAGACCAGUUGGUCAGUGU	19	6,6,6,7,6,6,6,6,6,6,6,6,6,6,6,6,6,6,6	3mer,4mer,4mer,6mer,5mer,5mer,3mer,4mer,5mer,4mer,2mer,4mer,4mer,4mer,3mer,4mer,3mer,4mer,5mer	237,249,281,296,297,433,475,495,550,551,619,688,977,983,1033,1098,1186,1213,1635	U,U,U,U,G,A,U,G,C,A,C,U,A,A,U,A,C,A,C	2,1,4,2,2,2,3,2,2,2,2,2,3,3,2,2,2,3,3	1,1,4,1,1,1,2,1,1,1,2,1,1,1,1,0,1,1,1	0,1,0,1,0,0,0,2,1,1,0,2,2,2,1,0,0,2,0	0,1,0,1,0,0,0,2,1,1,0,1,1,1,1,0,0,1,0	0.4,0.35,0.5,0.45,0.4,0.85,0.45,0.5,0.5,0.6,0.45,0.7,0.5,0.5,0.45,0.45,0.55,0.6,0.55
>hsa-miR-149-5p	UCUGGCUCCGUGUCUUCACUCCC	CCCUCACUUCUGUGCCUCGGUCU	19	6,6,6,6,6,6,6,6,7,7,6,6,6,6,6,6,6,6,6	3mer,3mer,3mer,3mer,3mer,3mer,3mer,3mer,3mer,7mer,3mer,4mer,3mer,4mer,4mer,4mer,3mer,6mer,4mer	135,248,550,568,1029,1182,1238,1250,1277,1297,1310,1351,1384,1388,1389,1598,1631,1702,1703	G,C,C,A,U,C,U,A,A,U,C,A,C,G,A,A,U,G,U	2,2,2,1,2,2,1,1,2,1,2,4,1,2,1,2,2,1,2	2,1,0,1,1,1,0,1,0,0,1,1,0,1,0,1,2,1,2	2,1,0,2,2,3,1,2,1,1,3,2,2,3,3,1,0,1,2	1,0,0,2,1,1,1,2,0,0,1,1,1,1,0,1,0,0,2	0.55,0.3,0.5,0.8,0.45,0.45,0.6,0.65,0.55,0.5,0.45,0.55,0.35,0.4,0.45,0.55,0.65,0.65,0.65
>hsa-miR-376a-3p	AUCAUAGAGGAAAAUCCACGU	UGCACCUAAAAGGAGAUACUA	19	6,6,7,6,6,6,6,6,6,6,6,6,6,6,6,6,6,6,6	4mer,5mer,5mer,4mer,3mer,4mer,6mer,5mer,5mer,3mer,3mer,5mer,3mer,3mer,3mer,4mer,3mer,3mer,5mer	192,378,441,442,482,528,693,694,776,838,870,950,1097,1143,1272,1345,1346,1482,1759	G,U,A,A,C,U,A,C,C,G,G,U,C,A,G,A,G,G,A	0,0,1,2,2,2,1,1,2,4,1,1,3,0,3,0,1,1,1	0,0,0,1,1,1,0,1,1,2,0,1,2,0,2,0,1,0,0	2,1,2,2,2,2,1,2,2,2,3,1,2,0,2,2,2,1,2	1,0,1,1,1,1,0,2,1,2,3,1,2,0,1,1,2,1,1	0.6,0.5,0.7,0.7,0.6,0.6,0.5,0.45,0.6,0.6,0.5,0.35,0.45,0.55,0.6,0.4,0.35,0.45,0.45
>hsa-miR-376b-3p	AUCAUAGAGGAAAAUCCAUGUU	UUGUACCUAAAAGGAGAUACUA	19	6,6,7,6,6,6,6,6,6,6,6,6,6,6,6,6,6,6,6	4mer,5mer,5mer,4mer,3mer,4mer,6mer,5mer,5mer,3mer,3mer,5mer,3mer,3mer,3mer,4mer,3mer,3mer,5mer	192,378,441,442,482,528,693,694,776,838,870,950,1097,1143,1272,1345,1346,1482,1759	G,U,A,A,C,U,A,C,C,G,G,U,C,A,G,A,G,G,A	0,0,1,2,2,2,1,1,2,4,1,1,3,0,3,0,1,1,1	0,0,0,1,1,1,0,1,1,2,0,1,2,0,2,0,1,0,0	2,1,2,2,2,2,1,2,2,2,3,1,2,0,2,2,2,1,2	1,0,1,1,1,1,0,2,1,2,3,1,2,0,1,1,2,1,1	0.6,0.5,0.7,0.7,0.6,0.6,0.5,0.45,0.6,0.6,0.5,0.35,0.45,0.55,0.6,0.4,0.35,0.45,0.45
>hsa-miR-598-3p	UACGUCAUCGUUGUCAUCGUCA	ACUGCUACUGUUGCUACUGCAU	19	6,6,6,6,6,6,6,6,6,6,6,6,6,6,6,6,6,6,6	4mer,3mer,4mer,4mer,3mer,4mer,4mer,3mer,4mer,4mer,5mer,3mer,3mer,6mer,6mer,5mer,5mer,4mer,3mer	56,485,507,519,520,531,631,636,685,744,747,771,772,779,852,939,940,1747,1748	G,C,G,U,C,A,G,G,G,C,G,U,A,A,A,U,G,U,G	1,1,4,3,2,1,2,3,2,2,4,2,2,2,4,2,2,2,2	0,1,1,3,2,0,1,2,1,1,1,0,0,0,2,1,1,2,2	1,2,1,0,1,4,2,3,2,2,1,2,3,1,2,2,3,2,0	0,2,1,0,0,2,1,1,1,1,1,2,1,0,2,1,1,1,0	0.55,0.55,0.6,0.55,0.55,0.4,0.35,0.45,0.55,0.55,0.6,0.6,0.6,0.75,0.6,0.3,0.25,0.65,0.6
>hsa-miR-1287-5p	UGCUGGAUCAGUGGUUCGAGUC	CUGAGCUUGGUGACUAGGUCGU	19	6,6,6,6,6,6,6,6,6,6,6,6,6,6,6,6,6,6,6	2mer,5mer,5mer,5mer,5mer,5mer,3mer,2mer,4mer,4mer,3mer,5mer,5mer,3mer,3mer,6mer,4mer,4mer,5mer	33,274,293,294,325,326,385,548,551,586,587,655,670,795,1025,1158,1210,1298,1711	U,C,C,A,U,C,A,A,A,C,U,C,G,U,A,A,G,G,U	1,1,2,1,2,3,2,2,2,3,1,1,1,2,2,2,2,3,1	1,1,2,1,0,2,1,2,2,1,0,1,1,2,1,1,1,2,1	2,2,3,3,2,1,3,3,2,2,3,3,2,2,2,3,2,1,4	0,1,2,1,1,0,0,0,2,2,2,3,1,1,1,2,1,1,2	0.75,0.45,0.5,0.5,0.7,0.6,0.6,0.5,0.6,0.6,0.55,0.55,0.4,0.6,0.35,0.75,0.55,0.4,0.45
>hsa-miR-20a-3p	ACUGCAUUAUGAGCACUUAAAG	GAAAUUCACGAGUAUUACGUCA	18	6,6,6,6,6,6,6,6,7,6,6,6,6,6,6,6,6,6	3mer,4mer,3mer,3mer,3mer,3mer,2mer,3mer,7mer,3mer,3mer,3mer,4mer,4mer,5mer,4mer,4mer,4mer	129,475,533,568,630,635,674,779,794,867,1100,1258,1384,1396,1565,1566,1676,1749	G,U,G,A,U,U,A,A,U,U,A,C,C,G,G,A,U,C	1,1,4,2,2,2,2,3,2,2,2,2,2,2,3,1,1,2	1,1,4,2,2,1,1,1,1,0,1,1,1,1,1,1,0,2	0,0,3,1,2,1,2,2,1,1,2,2,1,2,0,1,2,0	0,0,2,1,1,1,1,2,1,1,1,1,1,2,0,0,1,0	0.4,0.45,0.45,0.8,0.4,0.4,0.5,0.75,0.6,0.5,0.5,0.5,0.35,0.3,0.5,0.5,0.55,0.7
>hsa-miR-101-5p	CAGUUAUCACAGUGCUGAUGCU	UCGUAGUCGUGACACUAUUGAC	18	6,6,6,6,6,6,6,6,6,6,6,6,6,6,7,6,6,6	2mer,3mer,3mer,3mer,2mer,4mer,3mer,3mer,4mer,6mer,3mer,2mer,3mer,3mer,3mer,4mer,3mer,4mer	56,128,254,577,581,607,677,689,696,712,746,747,785,851,1057,1119,1235,1283	G,G,C,A,U,G,C,A,U,C,U,G,C,A,C,C,C,C	2,1,1,1,1,3,3,2,1,2,2,0,0,1,2,2,1,1	1,1,1,1,1,3,2,2,1,1,1,0,0,1,1,1,1,1	1,2,2,2,3,1,1,2,0,2,1,2,1,1,1,3,2,3	0,1,1,1,2,0,0,1,0,2,0,2,0,1,1,1,1,1	0.55,0.4,0.3,0.55,0.5,0.55,0.5,0.6,0.45,0.55,0.65,0.6,0.6,0.65,0.55,0.35,0.55,0.45
>hsa-miR-199a-3p	ACAGUAGUCUGCACAUUGGUUA	AUUGGUUACACGUCUGAUGACA	18	6,6,6,6,6,6,6,6,7,6,6,6,6,6,6,6,6,6	2mer,2mer,3mer,4mer,4mer,3mer,2mer,4mer,3mer,2mer,3mer,3mer,3mer,3mer,4mer,3mer,3mer,3mer	106,317,599,608,786,814,815,959,962,963,969,1130,1142,1481,1541,1559,1691,1752	U,U,A,C,U,G,G,C,G,C,U,C,A,A,G,A,A,U	1,2,2,3,3,2,2,1,2,2,3,1,3,1,1,1,2,2	1,1,1,2,1,1,1,1,0,2,2,1,2,1,0,0,1,1	2,3,2,1,1,0,1,2,3,2,1,2,1,0,1,1,1,1	1,2,1,1,1,0,1,1,2,1,1,1,1,0,1,0,1,1	0.45,0.55,0.3,0.6,0.6,0.4,0.45,0.45,0.45,0.5,0.4,0.35,0.6,0.45,0.4,0.5,0.7,0.8
>hsa-miR-199b-3p	ACAGUAGUCUGCACAUUGGUUA	AUUGGUUACACGUCUGAUGACA	18	6,6,6,6,6,6,6,6,7,6,6,6,6,6,6,6,6,6	2mer,2mer,3mer,4mer,4mer,3mer,2mer,4mer,3mer,2mer,3mer,3mer,3mer,3mer,4mer,3mer,3mer,3mer	106,317,599,608,786,814,815,959,962,963,969,1130,1142,1481,1541,1559,1691,1752	U,U,A,C,U,G,G,C,G,C,U,C,A,A,G,A,A,U	1,2,2,3,3,2,2,1,2,2,3,1,3,1,1,1,2,2	1,1,1,2,1,1,1,1,0,2,2,1,2,1,0,0,1,1	2,3,2,1,1,0,1,2,3,2,1,2,1,0,1,1,1,1	1,2,1,1,1,0,1,1,2,1,1,1,1,0,1,0,1,1	0.45,0.55,0.3,0.6,0.6,0.4,0.45,0.45,0.45,0.5,0.4,0.35,0.6,0.45,0.4,0.5,0.7,0.8
>hsa-miR-214-3p	ACAGCAGGCACAGACAGGCAGU	UGACGGACAGACACGGACGACA	18	6,6,6,6,7,6,6,6,6,6,6,6,6,6,7,6,6,6	3mer,5mer,4mer,3mer,7mer,5mer,3mer,6mer,5mer,6mer,5mer,3mer,3mer,5mer,6mer,5mer,4mer,6mer	60,68,251,770,814,815,880,962,963,1142,1222,1268,1271,1464,1481,1559,1732,1752	U,C,A,U,G,G,G,G,C,A,A,G,A,U,A,A,U,U	1,1,1,1,1,1,1,2,1,2,0,2,2,1,1,1,1,2	1,1,1,1,1,1,1,2,1,1,0,1,2,1,1,1,1,2	2,2,2,2,0,0,2,3,3,2,2,2,2,2,0,1,3,0	2,1,1,2,0,0,2,2,2,1,2,2,1,1,0,1,2,0	0.6,0.5,0.3,0.6,0.4,0.45,0.35,0.45,0.5,0.6,0.55,0.5,0.6,0.55,0.45,0.5,0.6,0.8
>hsa-miR-1-3p	UGGAAUGUAAAGAAGUAUGUAU	UAUGUAUGAAGAAAUGUAAGGU	18	6,6,6,6,6,7,6,6,6,6,6,6,6,6,6,6,6,6	4mer,3mer,3mer,5mer,3mer,6mer,5mer,4mer,4mer,4mer,4mer,4mer,4mer,3mer,3mer,3mer,3mer,4mer	205,229,240,281,328,478,618,619,667,877,878,898,899,1032,1218,1460,1581,1707	U,C,C,U,G,A,C,C,A,C,U,C,U,C,G,G,A,A	0,0,1,1,2,2,0,1,1,1,1,1,1,0,1,3,2,0	0,0,1,1,1,1,0,1,1,1,0,1,0,0,1,2,1,0	1,1,2,2,2,1,2,3,1,2,1,2,2,2,1,2,1,1	0,0,2,1,1,1,1,3,1,1,1,1,1,2,0,0,1,1	0.65,0.45,0.35,0.5,0.65,0.6,0.35,0.45,0.45,0.45,0.4,0.45,0.5,0.4,0.5,0.45,0.5,0.5
>hsa-miR-145-5p	GUCCAGUUUUCCCAGGAAUCCCU	UCCCUAAGGACCCUUUUGACCUG	18	6,6,6,6,6,6,6,6,6,6,6,6,6,6,6,7,6,6	5mer,3mer,6mer,5mer,2mer,3mer,5mer,5mer,5mer,4mer,3mer,3mer,4mer,5mer,2mer,6mer,5mer,3mer	120,157,367,368,403,409,610,750,759,861,1051,1107,1230,1543,1658,1715,1716,1734	A,A,G,A,A,U,C,G,A,A,A,G,U,C,A,G,U,C	1,2,3,2,2,1,2,3,2,3,2,2,1,1,2,1,2,0	1,1,2,1,1,0,1,2,1,1,1,1,1,0,1,1,1,0	1,0,1,2,2,0,4,0,4,1,2,2,4,2,1,0,1,2	0,0,1,1,1,0,3,0,4,0,1,2,3,1,1,0,1,1	0.55,0.6,0.5,0.55,0.55,0.7,0.55,0.6,0.55,0.5,0.5,0.65,0.65,0.3,0.45,0.4,0.45,0.55
>hsa-miR-126-5p	CAUUAUUACUUUUGGUACGCG	GCGCAUGGUUUUCAUUAUUAC	18	6,6,6,6,6,6,6,6,6,6,6,6,6,6,6,6,6,6	3mer,3mer,2mer,3mer,2mer,4mer,2mer,3mer,3mer,3mer,2mer,3mer,3mer,3mer,4mer,4mer,5mer,3mer	54,334,379,517,529,576,742,1147,1150,1151,1153,1216,1235,1239,1507,1681,1684,1745	C,C,C,G,G,U,G,G,U,A,C,C,C,A,A,A,C,G	1,1,3,2,1,2,0,1,1,2,3,2,2,3,4,1,3,1	1,0,1,1,0,1,0,0,0,1,3,2,1,1,2,0,2,1	2,3,2,2,3,3,1,2,4,2,4,3,3,3,3,3,2,3	1,3,0,1,0,1,0,0,1,1,1,0,1,1,3,2,1,1	0.65,0.45,0.45,0.45,0.5,0.6,0.5,0.4,0.5,0.5,0.55,0.55,0.55,0.6,0.55,0.6,0.65,0.45
>hsa-miR-340-3p	UCCGUCUCAGUUACUUUAUAGC	CGAUAUUUCAUUGACUCUGCCU	18	6,6,6,6,6,6,7,6,6,6,6,6,6,7,6,6,6,6	3mer,3mer,4mer,2mer,5mer,3mer,4mer,4mer,2mer,3mer,5mer,5mer,4mer,7mer,3mer,3mer,4mer,3mer	135,136,197,519,779,821,860,1029,1083,1139,1182,1250,1256,1310,1328,1384,1668,1714	G,G,A,U,A,A,A,U,A,C,C,A,A,C,G,C,C,A	3,2,2,3,3,2,1,1,2,1,2,2,3,1,1,3,2,1	2,2,1,3,1,0,0,1,2,1,1,2,2,0,1,1,2,1	3,2,3,0,1,2,2,2,2,1,2,3,3,2,1,1,1,2	1,1,1,0,1,1,1,1,1,1,1,3,2,1,1,0,1,2	0.55,0.55,0.7,0.55,0.75,0.55,0.55,0.45,0.45,0.5,0.45,0.65,0.55,0.45,0.45,0.35,0.6,0.4
>hsa-miR-423-5p	UGAGGGGCAGAGAGCGAGACUUU	UUUCAGAGCGAGAGACGGGGAGU	18	6,6,6,6,6,6,6,6,6,6,6,7,6,6,6,6,6,6	2mer,3mer,4mer,3mer,6mer,5mer,3mer,5mer,4mer,4mer,3mer,5mer,2mer,3mer,3mer,3mer,4mer,4mer	90,228,258,259,264,265,285,289,290,524,591,1035,1038,1060,1454,1613,1724,1727	A,C,C,C,C,A,C,C,A,A,G,A,C,A,A,A,C,A	1,0,1,2,3,2,3,3,1,2,3,2,1,1,1,0,1,2	1,0,0,2,2,1,1,2,0,1,2,1,0,1,1,0,1,1	3,1,2,1,2,3,1,3,1,1,1,1,2,1,1,0,1,1	1,1,1,0,1,2,1,1,0,1,0,1,2,1,1,0,0,1	0.5,0.45,0.4,0.45,0.5,0.5,0.5,0.55,0.5,0.65,0.6,0.45,0.45,0.6,0.55,0.7,0.5,0.5
>hsa-miR-452-5p	AACUGUUUGCAGAGGAAACUGA	AGUCAAAGGAGACGUUUGUCAA	18	6,6,6,7,6,6,6,6,6,6,6,6,6,6,6,6,6,6	6mer,4mer,4mer,5mer,4mer,5mer,5mer,4mer,2mer,3mer,6mer,5mer,4mer,4mer,4mer,4mer,3mer,3mer	156,454,455,471,514,631,685,795,828,996,1050,1106,1183,1239,1251,1298,1326,1435	G,U,G,G,G,G,G,U,U,U,G,G,C,A,G,G,G,A	1,0,0,1,1,2,1,1,0,2,2,0,1,0,1,0,0,2	1,0,0,1,0,1,1,0,0,1,1,0,1,0,1,0,0,2	0,0,0,2,1,2,0,2,0,1,2,2,0,2,1,1,2,1	0,0,0,1,0,1,0,1,0,1,1,1,0,1,0,1,2,1	0.6,0.65,0.65,0.5,0.45,0.35,0.55,0.6,0.65,0.35,0.45,0.65,0.5,0.6,0.55,0.4,0.35,0.5
>hsa-miR-486-3p	CGGGGCAGCUCAGUACAGGAU	UAGGACAUGACUCGACGGGGC	18	6,6,6,6,6,6,6,6,6,6,6,6,6,6,7,6,6,6	3mer,2mer,3mer,2mer,2mer,4mer,3mer,2mer,4mer,3mer,5mer,4mer,4mer,3mer,4mer,3mer,4mer,3mer	70,111,255,256,259,262,287,289,463,589,703,957,958,1033,1131,1132,1223,1736	G,U,C,U,C,U,U,C,A,C,G,U,G,U,C,G,A,A	1,1,3,1,1,0,1,1,3,1,1,2,3,1,0,1,1,3	1,1,2,0,0,0,1,1,2,1,1,1,2,1,0,1,1,2	3,0,1,2,2,1,0,2,1,1,2,2,0,1,1,2,3,2	1,0,0,0,1,1,0,1,1,1,2,1,0,1,1,1,2,1	0.55,0.6,0.25,0.3,0.45,0.5,0.6,0.55,0.55,0.55,0.6,0.35,0.4,0.45,0.4,0.35,0.6,0.6
>hsa-miR-3184-5p	UGAGGGGCCUCAGACCGAGCUUUU	UUUUCGAGCCAGACUCCGGGGAGU	18	6,6,6,6,6,6,6,6,6,6,6,7,6,6,6,6,6,6	2mer,3mer,4mer,3mer,6mer,5mer,3mer,5mer,4mer,4mer,3mer,5mer,2mer,3mer,3mer,3mer,4mer,4mer	90,228,258,259,264,265,285,289,290,524,591,1035,1038,1060,1454,1613,1724,1727	A,C,C,C,C,A,C,C,A,A,G,A,C,A,A,A,C,A	2,2,2,1,1,0,1,1,0,3,1,2,2,2,2,1,2,3	1,1,1,0,1,0,1,1,0,3,1,1,1,2,1,1,1,3	4,1,2,0,2,2,1,2,2,0,1,0,2,0,0,1,1,2	3,1,2,0,1,1,1,1,2,0,1,0,1,0,0,1,1,2	0.5,0.45,0.4,0.45,0.5,0.5,0.5,0.55,0.5,0.65,0.6,0.45,0.45,0.6,0.55,0.7,0.5,0.5
>hsa-miR-15a-5p	UAGCAGCACAUAAUGGUUUGUG	GUGUUUGGUAAUACACGACGAU	17	6,6,6,6,6,6,6,6,6,6,6,6,6,6,7,6,6	5mer,4mer,4mer,3mer,4mer,3mer,2mer,3mer,2mer,3mer,6mer,5mer,4mer,4mer,7mer,5mer,4mer	67,254,414,415,417,461,772,796,829,965,1141,1561,1579,1748,1751,1754,1755	U,C,U,U,U,A,A,U,U,U,G,G,U,G,G,U,A	3,2,3,3,1,1,2,1,1,1,0,0,3,1,2,2,2	2,1,3,2,0,1,1,1,1,1,0,0,3,1,2,2,1	2,3,2,2,2,1,2,3,1,3,1,2,1,1,1,1,2	1,3,0,2,2,0,2,1,0,0,1,1,1,1,1,1,0	0.5,0.3,0.8,0.75,0.65,0.6,0.6,0.65,0.65,0.45,0.55,0.5,0.5,0.6,0.7,0.75,0.7
>hsa-miR-16-5p	UAGCAGCACGUAAAUAUUGGCG	GCGGUUAUAAAUGCACGACGAU	17	6,6,6,6,6,6,6,6,6,6,6,6,6,6,7,6,6	5mer,4mer,4mer,3mer,4mer,3mer,2mer,3mer,2mer,3mer,6mer,5mer,4mer,4mer,7mer,5mer,4mer	67,254,414,415,417,461,772,796,829,965,1141,1561,1579,1748,1751,1754,1755	U,C,U,U,U,A,A,U,U,U,G,G,U,G,G,U,A	3,2,3,3,1,1,2,1,1,2,1,1,3,1,2,2,3	1,1,1,1,0,1,0,0,0,2,1,1,1,1,1,1,1	3,0,2,1,2,1,2,3,1,1,2,3,1,1,1,2,2	2,0,1,0,1,1,1,2,0,1,1,2,0,1,1,2,2	0.5,0.3,0.8,0.75,0.65,0.6,0.6,0.65,0.65,0.45,0.55,0.5,0.5,0.6,0.7,0.75,0.7
>hsa-miR-15b-5p	UAGCAGCACAUCAUGGUUUACA	ACAUUUGGUACUACACGACGAU	17	6,6,6,6,6,6,6,6,6,6,6,6,6,6,7,6,6	5mer,4mer,4mer,3mer,4mer,3mer,2mer,3mer,2mer,3mer,6mer,5mer,4mer,4mer,7mer,5mer,4mer	67,254,414,415,417,461,772,796,829,965,1141,1561,1579,1748,1751,1754,1755	U,C,U,U,U,A,A,U,U,U,G,G,U,G,G,U,A	3,2,3,3,2,1,2,1,1,1,0,0,3,1,2,2,1	2,1,3,2,1,1,1,1,1,1,0,0,3,1,2,2,0	2,3,2,2,2,1,2,3,1,3,1,2,1,1,1,1,2	1,3,0,2,2,0,2,1,0,0,1,1,1,1,1,1,0	0.5,0.3,0.8,0.75,0.65,0.6,0.6,0.65,0.65,0.45,0.55,0.5,0.5,0.6,0.7,0.75,0.7
>hsa-miR-23b-5p	UGGGUUCCUGGCAUGCUGAUUU	UUUAGUCGUACGGUCCUUGGGU	17	6,6,6,6,6,7,6,6,6,6,6,6,6,6,6,6,6	6mer,2mer,5mer,4mer,2mer,6mer,3mer,5mer,4mer,3mer,4mer,4mer,2mer,3mer,4mer,3mer,3mer	99,161,202,203,239,810,1073,1088,1089,1261,1368,1403,1404,1420,1451,1486,1487	A,A,C,C,C,G,A,C,U,U,U,C,C,A,U,C,C	3,2,1,2,3,2,3,1,3,0,3,2,1,1,1,2,2	1,2,1,1,2,1,0,1,1,0,1,1,0,1,1,1,1	1,2,1,2,1,2,3,1,2,2,3,3,1,1,2,3,1	0,0,1,0,1,0,3,1,2,2,1,2,1,0,1,2,1	0.6,0.7,0.65,0.65,0.3,0.45,0.55,0.5,0.5,0.55,0.4,0.45,0.45,0.45,0.65,0.5,0.55
>hsa-miR-142-3p	UGUAGUGUUUCCUACUUUAUGGA	AGGUAUUUCAUCCUUUGUGAUGU	17	6,6,6,6,6,6,6,6,6,6,6,6,6,6,6,6,6	4mer,2mer,3mer,5mer,3mer,3mer,2mer,3mer,3mer,3mer,3mer,4mer,4mer,4mer,4mer,4mer,3mer	240,281,315,366,473,579,580,597,609,619,633,960,983,1128,1494,1527,1688	C,U,U,A,A,C,U,U,A,C,C,U,A,U,C,A,U	2,1,1,2,2,1,2,0,3,2,3,2,1,0,0,0,1	0,1,0,1,1,1,1,0,1,1,2,1,1,0,0,0,1	1,2,0,2,2,2,1,0,1,3,1,2,3,1,2,1,1	1,1,0,1,1,1,1,0,1,1,1,1,2,1,1,0,1	0.35,0.5,0.5,0.5,0.5,0.55,0.6,0.45,0.6,0.45,0.35,0.5,0.5,0.5,0.35,0.4,0.7
>hsa-miR-195-5p	UAGCAGCACAGAAAUAUUGGC	CGGUUAUAAAGACACGACGAU	17	6,6,6,6,6,6,6,6,6,6,6,6,6,6,7,6,6	5mer,4mer,4mer,3mer,4mer,3mer,2mer,3mer,2mer,3mer,6mer,5mer,4mer,4mer,7mer,5mer,4mer	67,254,414,415,417,461,772,796,829,965,1141,1561,1579,1748,1751,1754,1755	U,C,U,U,U,A,A,U,U,U,G,G,U,G,G,U,A	3,1,2,2,0,1,2,2,2,1,1,1,2,0,1,1,1	2,0,2,1,0,1,1,2,2,1,1,1,2,0,0,0,1	3,0,2,1,2,1,2,3,1,1,2,3,1,1,1,2,2	2,0,1,0,1,1,1,2,0,1,1,2,0,1,1,2,2	0.5,0.3,0.8,0.75,0.65,0.6,0.6,0.65,0.65,0.45,0.55,0.5,0.5,0.6,0.7,0.75,0.7
>hsa-miR-424-5p	CAGCAGCAAUUCAUGUUUUGAA	AAGUUUUGUACUUAACGACGAC	17	6,6,6,6,6,6,6,6,6,6,6,6,6,6,7,6,6	5mer,4mer,4mer,3mer,4mer,3mer,2mer,3mer,2mer,3mer,6mer,5mer,4mer,4mer,7mer,5mer,4mer	67,254,414,415,417,461,772,796,829,965,1141,1561,1579,1748,1751,1754,1755	U,C,U,U,U,A,A,U,U,U,G,G,U,G,G,U,A	1,1,2,2,4,2,1,1,1,2,1,0,2,2,2,2,2	1,1,2,1,1,1,1,1,0,1,0,0,2,2,1,1,1	3,2,2,3,3,2,3,3,2,2,2,2,2,2,2,1,3	1,2,0,2,2,1,2,1,0,0,1,1,1,2,1,1,1	0.5,0.3,0.8,0.75,0.65,0.6,0.6,0.65,0.65,0.45,0.55,0.5,0.5,0.6,0.7,0.75,0.7
>hsa-miR-409-5p	AGGUUACCCGAGCAACUUUGCAU	UACGUUUCAACGAGCCCAUUGGA	17	6,6,7,6,6,6,6,6,6,6,6,6,6,6,6,6,6	2mer,5mer,3mer,3mer,3mer,5mer,3mer,3mer,3mer,2mer,3mer,3mer,2mer,2mer,2mer,4mer,2mer	305,390,506,607,629,712,746,872,938,939,955,977,1368,1386,1403,1451,1722	U,A,U,G,G,C,U,A,C,U,A,A,U,G,C,U,U	3,1,0,2,2,1,0,2,3,3,2,2,2,1,1,0,1	1,1,0,2,1,1,0,1,3,2,2,2,2,1,1,0,0	1,1,1,1,2,1,2,1,1,3,1,2,1,1,1,0,0	1,1,1,1,2,1,2,1,1,2,1,1,1,1,1,0,0	0.6,0.75,0.6,0.55,0.4,0.55,0.65,0.5,0.35,0.3,0.4,0.5,0.4,0.4,0.45,0.65,0.4
>hsa-miR-497-5p	CAGCAGCACACUGUGGUUUGU	UGUUUGGUGUCACACGACGAC	17	6,6,6,6,6,6,6,6,6,6,6,6,6,6,7,6,6	5mer,4mer,4mer,3mer,4mer,3mer,2mer,3mer,2mer,3mer,6mer,5mer,4mer,4mer,7mer,5mer,4mer	67,254,414,415,417,461,772,796,829,965,1141,1561,1579,1748,1751,1754,1755	U,C,U,U,U,A,A,U,U,U,G,G,U,G,G,U,A	3,2,3,2,2,0,2,1,1,0,0,0,3,1,1,1,1	2,2,2,1,1,0,1,1,1,0,0,0,2,1,1,1,1	2,3,2,2,2,1,2,3,1,4,2,2,1,1,1,1,2	0,3,0,2,1,0,1,1,0,1,1,0,1,1,1,1,0	0.5,0.3,0.8,0.75,0.65,0.6,0.6,0.65,0.65,0.45,0.55,0.5,0.5,0.6,0.7,0.75,0.7
>hsa-miR-411-5p	UAGUAGACCGUAUAGCGUACG	GCAUGCGAUAUGCCAGAUGAU	17	6,6,6,6,6,6,6,6,6,6,6,6,6,6,6,6,6	3mer,3mer,4mer,3mer,2mer,4mer,3mer,2mer,3mer,4mer,3mer,3mer,3mer,4mer,4mer,2mer,5mer	67,68,112,250,436,785,1063,1141,1221,1270,1463,1480,1579,1689,1690,1751,1758	U,C,A,G,U,C,U,G,C,G,C,G,U,U,G,G,A	3,1,2,2,2,3,2,1,2,2,1,1,3,2,2,2,3	1,1,1,1,1,3,1,1,2,1,1,1,1,1,1,1,1	1,3,1,2,1,2,2,3,1,0,1,3,1,1,4,1,1	0,2,1,2,1,1,1,3,1,0,1,2,0,1,2,1,0	0.5,0.5,0.55,0.3,0.8,0.6,0.4,0.55,0.5,0.6,0.55,0.35,0.5,0.7,0.65,0.7,0.5
>hsa-miR-654-3p	UAUGUCUGCUGACCAUCACCUU	UUCCACUACCAGUCGUCUGUAU	17	6,6,6,6,6,6,6,6,6,6,6,6,6,6,6,6,6	4mer,3mer,5mer,4mer,3mer,3mer,4mer,4mer,4mer,3mer,3mer,3mer,3mer,4mer,3mer,3mer,3mer	202,296,312,471,475,485,572,615,708,742,1053,1114,1161,1254,1290,1592,1671	C,U,U,G,U,C,A,U,A,G,G,A,U,G,G,A,G	1,1,1,2,1,2,1,2,2,2,2,2,2,1,1,1,2	1,1,1,2,1,1,0,1,0,1,1,1,1,0,1,1,2	2,1,2,2,0,2,0,1,1,2,0,1,2,2,1,1,1	1,1,1,2,0,2,0,0,1,1,0,0,2,1,1,1,1	0.65,0.45,0.5,0.5,0.45,0.55,0.65,0.45,0.5,0.5,0.55,0.45,0.7,0.55,0.55,0.6,0.55
>hsa-miR-21-5p	UAGCUUAUCAGACUGAUGUUGA	AGUUGUAGUCAGACUAUUCGAU	16	6,6,6,6,6,6,6,6,6,6,6,6,6,6,6,6	2mer,4mer,3mer,4mer,2mer,2mer,3mer,3mer,3mer,3mer,3mer,4mer,5mer,3mer,3mer,3mer	56,250,373,581,696,747,826,874,895,940,997,1119,1260,1295,1576,1748	G,G,U,U,U,G,G,U,U,G,G,C,C,A,A,G	1,2,3,1,0,2,0,3,2,2,1,0,0,1,0,0	1,1,2,0,0,2,0,2,2,1,1,0,0,1,0,0	1,1,2,1,2,2,3,1,2,2,2,2,1,1,2,1	0,1,2,1,1,1,1,1,1,0,1,1,1,1,2,1	0.55,0.3,0.5,0.5,0.45,0.6,0.6,0.4,0.4,0.25,0.35,0.35,0.5,0.5,0.6,0.6
>hsa-miR-187-3p	UCGUGUCUUGUGUUGCAGCCGG	GGCCGACGUUGUGUUCUGUGCU	16	6,6,6,6,6,6,6,6,6,6,6,6,6,6,6,6	4mer,3mer,5mer,3mer,3mer,4mer,4mer,4mer,3mer,2mer,3mer,3mer,3mer,4mer,3mer,3mer	136,149,162,164,362,472,632,686,692,827,851,859,941,1028,1255,1309	G,A,U,A,C,C,C,A,A,U,A,G,G,G,A,G	3,2,3,2,3,3,1,2,2,2,1,3,1,2,1,3	2,0,2,0,3,2,0,1,2,2,1,2,0,1,0,0	2,3,3,1,2,2,1,2,3,3,3,2,2,2,2,2	1,1,2,1,0,0,1,1,1,0,1,1,0,1,1,1	0.55,0.4,0.65,0.6,0.5,0.5,0.4,0.65,0.5,0.65,0.65,0.45,0.35,0.4,0.6,0.4
>hsa-miR-15b-3p	CGAAUCAUUAUUUGCUGCUCUA	AUCUCGUCGUUUAUUACUAAGC	16	6,6,6,6,6,6,6,6,6,6,6,6,6,6,6,6	5mer,5mer,4mer,3mer,4mer,3mer,3mer,2mer,3mer,4mer,6mer,5mer,4mer,3mer,4mer,5mer	56,381,477,522,772,831,953,954,967,1058,1152,1153,1236,1275,1722,1747	G,A,C,U,A,U,C,C,U,U,U,C,A,A,U,U	2,2,2,4,2,2,1,2,1,3,3,3,3,2,2,3	1,1,1,3,1,1,0,2,1,1,1,2,2,1,1,2	1,3,1,1,1,2,2,2,3,1,2,3,0,2,2,1	0,2,0,0,0,1,0,1,2,1,2,0,0,0,2,1	0.55,0.55,0.5,0.65,0.6,0.6,0.25,0.3,0.45,0.55,0.55,0.55,0.55,0.6,0.4,0.65
>hsa-miR-133a-3p	UUUGGUCCCCUUCAACCAGCUG	GUCGACCAACUUCCCCUGGUUU	16	6,6,6,6,6,6,6,6,6,6,6,6,6,6,6,6	2mer,3mer,4mer,3mer,4mer,4mer,2mer,3mer,3mer,3mer,4mer,3mer,3mer,3mer,3mer,5mer	180,356,383,488,509,642,947,1011,1234,1297,1342,1350,1361,1565,1631,1738	U,G,G,A,A,C,U,C,U,U,U,G,G,G,U,A	2,1,0,2,2,2,1,2,1,2,2,0,4,1,2,2	1,1,0,1,1,1,0,1,1,0,1,0,3,0,2,1	0,2,0,2,0,0,2,2,1,2,2,1,1,0,2,1	0,2,0,2,0,0,2,1,1,1,1,1,1,0,2,1	0.7,0.45,0.6,0.5,0.5,0.4,0.35,0.4,0.6,0.5,0.45,0.55,0.45,0.5,0.65,0.55
>hsa-miR-143-3p	UGAGAUGAAGCACUGUAGCUC	CUCGAUGUCACGAAGUAGAGU	16	6,6,6,6,6,6,6,6,6,6,6,6,7,6,6,6	3mer,6mer,5mer,4mer,4mer,4mer,3mer,3mer,3mer,5mer,5mer,2mer,7mer,5mer,2mer,4mer	206,228,229,285,307,436,619,898,899,979,1040,1092,1459,1460,1581,1635	A,C,C,C,G,U,C,C,U,U,C,A,U,G,A,C	1,1,0,2,2,0,1,2,2,2,2,1,2,2,3,3	1,1,0,1,2,0,1,1,2,1,1,1,2,1,2,2	2,2,3,2,2,1,3,2,2,1,4,2,1,3,2,1	1,1,2,1,2,1,2,0,1,0,2,1,0,1,1,1	0.65,0.45,0.45,0.5,0.55,0.8,0.45,0.45,0.5,0.4,0.35,0.55,0.45,0.45,0.5,0.55
>hsa-miR-382-5p	GAAGUUGUUCGUGGUGGAUUCG	GCUUAGGUGGUGCUUGUUGAAG	16	6,6,6,6,6,6,7,6,6,6,6,6,6,6,6,6	4mer,3mer,3mer,2mer,5mer,2mer,3mer,2mer,5mer,3mer,4mer,4mer,5mer,4mer,3mer,2mer	106,107,307,437,608,617,664,665,697,1091,1218,1341,1619,1655,1678,1733	U,C,G,A,C,A,U,C,U,C,G,A,C,G,A,A	2,2,3,2,3,3,2,2,3,3,2,2,1,1,2,1	2,1,1,1,1,1,1,1,2,2,1,1,1,1,1,1	1,1,2,3,4,3,2,1,2,1,4,1,2,1,1,3	1,0,0,1,1,2,1,1,0,0,2,0,1,1,1,2	0.45,0.5,0.55,0.8,0.6,0.4,0.4,0.4,0.5,0.45,0.5,0.4,0.6,0.45,0.65,0.6
>hsa-miR-133b	UUUGGUCCCCUUCAACCAGCUA	AUCGACCAACUUCCCCUGGUUU	16	6,6,6,6,6,6,6,6,6,6,6,6,6,6,6,6	2mer,3mer,4mer,3mer,4mer,4mer,2mer,3mer,3mer,3mer,4mer,3mer,3mer,3mer,3mer,5mer	180,356,383,488,509,642,947,1011,1234,1297,1342,1350,1361,1565,1631,1738	U,G,G,A,A,C,U,C,U,U,U,G,G,G,U,A	2,1,0,2,2,2,1,2,1,2,2,0,4,1,2,2	1,1,0,1,1,1,0,1,1,0,1,0,3,0,2,1	0,2,0,2,0,0,2,2,1,2,2,1,1,0,2,1	0,2,0,2,0,0,2,1,1,1,1,1,1,0,2,1	0.7,0.45,0.6,0.5,0.5,0.4,0.35,0.4,0.6,0.5,0.45,0.55,0.45,0.5,0.65,0.55
>hsa-miR-345-5p	GCUGACUCCUAGUCCAGGGCUC	CUCGGGACCUGAUCCUCAGUCG	16	6,6,6,6,6,6,6,6,6,7,6,6,6,6,6,6	3mer,5mer,6mer,3mer,3mer,2mer,3mer,4mer,3mer,7mer,3mer,3mer,4mer,2mer,3mer,4mer	135,248,550,568,932,1005,1182,1238,1250,1277,1297,1310,1329,1380,1384,1631	G,C,C,A,G,G,C,U,A,A,U,C,G,G,C,U	1,1,0,2,3,2,0,1,1,2,1,4,1,0,1,1	1,0,0,1,1,1,0,1,0,0,1,1,0,0,0,1	1,1,1,0,2,2,2,0,1,2,2,2,2,0,2,0	1,1,1,0,2,1,1,0,1,2,1,1,2,0,1,0	0.55,0.3,0.5,0.8,0.3,0.5,0.45,0.6,0.65,0.55,0.5,0.45,0.45,0.4,0.35,0.65
>hsa-miR-409-3p	GAAUGUUGCUCGGUGAACCCCU	UCCCCAAGUGGCUCGUUGUAAG	16	6,6,6,6,6,6,6,6,6,6,6,6,6,6,6,6	3mer,4mer,4mer,3mer,5mer,3mer,5mer,5mer,2mer,3mer,4mer,4mer,2mer,3mer,3mer,6mer	227,278,297,307,313,492,577,616,665,828,875,896,897,1090,1151,1228	C,C,G,G,A,C,A,U,C,U,G,U,C,U,A,G	2,0,1,4,0,2,2,2,1,1,3,2,3,2,3,2	2,0,1,1,0,1,2,1,1,1,2,1,1,1,2,1	1,2,2,4,1,2,3,2,2,1,2,2,2,2,3,2	0,2,1,3,0,2,2,2,2,0,1,0,1,1,1,1	0.35,0.45,0.4,0.55,0.5,0.45,0.55,0.4,0.4,0.65,0.35,0.35,0.35,0.45,0.5,0.6
>hsa-miR-532-5p	CAUGCCUUGAGUGUAGGACCGU	UGCCAGGAUGUGAGUUCCGUAC	16	6,6,6,6,6,6,6,6,6,6,6,6,6,6,6,7	4mer,4mer,4mer,3mer,6mer,4mer,3mer,4mer,5mer,5mer,5mer,3mer,5mer,4mer,6mer,7mer	179,225,238,304,361,374,433,475,485,537,605,1202,1384,1449,1647,1671	A,C,C,C,A,A,A,U,C,A,C,U,C,C,C,G	1,1,2,3,2,1,4,2,3,2,3,1,2,2,1,1	1,0,1,1,1,0,2,1,1,1,1,1,0,2,1,0	1,1,2,3,1,2,2,1,2,3,2,2,0,2,3,2	0,1,1,1,1,2,2,1,1,1,1,1,0,2,2,1	0.7,0.35,0.3,0.65,0.55,0.5,0.85,0.45,0.55,0.5,0.45,0.5,0.35,0.55,0.55,0.55
>hsa-miR-590-5p	GAGCUUAUUCAUAAAAGUGCAG	GACGUGAAAAUACUUAUUCGAG	16	6,6,6,6,6,6,6,6,6,6,6,6,6,6,6,6	2mer,4mer,3mer,4mer,2mer,2mer,3mer,3mer,3mer,3mer,3mer,4mer,5mer,3mer,3mer,3mer	56,250,373,581,696,747,826,874,895,940,997,1119,1260,1295,1576,1748	G,G,U,U,U,G,G,U,U,G,G,C,C,A,A,G	3,1,3,2,1,2,1,3,2,2,1,1,3,3,3,2	2,0,2,2,0,0,0,1,0,1,1,1,2,1,2,1	3,1,0,0,1,2,1,1,1,2,0,0,0,1,0,0	3,1,0,0,1,2,1,1,1,1,0,0,0,1,0,0	0.55,0.3,0.5,0.5,0.45,0.6,0.6,0.4,0.4,0.25,0.35,0.35,0.5,0.5,0.6,0.6
>hsa-miR-664a-5p	ACUGGCUAGGGAAAAUGAUUGGAU	UAGGUUAGUAAAAGGGAUCGGUCA	16	6,6,7,6,6,6,6,6,6,6,6,6,6,6,6,6	3mer,4mer,3mer,3mer,4mer,4mer,4mer,3mer,4mer,5mer,3mer,6mer,4mer,4mer,6mer,4mer	248,324,550,568,623,642,704,1029,1157,1209,1277,1297,1388,1389,1702,1703	C,U,C,A,G,C,A,U,G,U,A,U,G,A,G,U	4,1,3,2,3,2,3,3,2,1,2,1,0,1,1,1	4,0,1,2,1,2,1,3,1,0,1,0,0,1,1,1	1,2,2,2,0,1,2,2,1,1,2,1,2,2,2,2	0,2,2,1,0,1,2,1,1,1,1,1,1,1,2,2	0.3,0.7,0.5,0.8,0.5,0.4,0.65,0.45,0.7,0.6,0.55,0.5,0.4,0.45,0.65,0.65
>hsa-miR-25-3p	CAUUGCACUUGUCUCGGUCUGA	AGUCUGGCUCUGUUCACGUUAC	15	6,6,6,6,6,6,6,6,6,6,6,6,6,6,6	5mer,2mer,3mer,5mer,2mer,4mer,2mer,4mer,4mer,3mer,2mer,4mer,3mer,4mer,3mer	304,325,406,476,631,636,685,795,796,909,1210,1216,1561,1578,1677	C,U,G,C,G,G,G,U,U,G,G,C,G,U,U	2,3,2,2,3,2,2,2,3,2,1,3,2,2,2	2,0,1,1,1,1,2,1,2,1,1,2,1,1,1	2,0,3,1,1,2,3,2,1,1,3,2,1,1,2	1,0,2,1,0,1,2,1,0,0,1,1,1,0,2	0.65,0.7,0.6,0.45,0.35,0.45,0.55,0.6,0.65,0.45,0.55,0.55,0.5,0.55,0.6
>hsa-miR-32-5p	UAUUGCACAUUACUAAGUUGCA	ACGUUGAAUCAUUACACGUUAU	15	6,6,6,6,6,6,6,6,6,6,6,6,6,6,6	5mer,2mer,3mer,5mer,2mer,4mer,2mer,4mer,4mer,3mer,2mer,4mer,3mer,4mer,3mer	304,325,406,476,631,636,685,795,796,909,1210,1216,1561,1578,1677	C,U,G,C,G,G,G,U,U,G,G,C,G,U,U	2,3,3,2,2,2,1,1,1,0,3,1,0,3,2	1,1,3,1,1,1,1,1,1,0,2,1,0,3,0	1,1,2,1,2,1,2,3,2,2,2,3,1,1,1	0,1,2,1,2,0,2,3,2,2,1,2,0,0,1	0.65,0.7,0.6,0.45,0.35,0.45,0.55,0.6,0.65,0.45,0.55,0.55,0.5,0.55,0.6
>hsa-miR-92a-3p	UAUUGCACUUGUCCCGGCCUGU	UGUCCGGCCCUGUUCACGUUAU	15	6,6,6,6,6,6,6,6,6,6,6,6,6,6,6	5mer,2mer,3mer,5mer,2mer,4mer,2mer,4mer,4mer,3mer,2mer,4mer,3mer,4mer,3mer	304,325,406,476,631,636,685,795,796,909,1210,1216,1561,1578,1677	C,U,G,C,G,G,G,U,U,G,G,C,G,U,U	2,3,2,2,3,2,2,2,3,2,1,3,2,2,2	2,0,1,1,1,1,2,1,2,1,1,2,1,1,1	2,0,2,0,1,2,2,1,1,1,3,2,1,1,1	1,0,1,0,0,2,1,0,0,0,2,1,1,1,1	0.65,0.7,0.6,0.45,0.35,0.45,0.55,0.6,0.65,0.45,0.55,0.55,0.5,0.55,0.6
>hsa-miR-93-3p	ACUGCUGAGCUAGCACUUCCCG	GCCCUUCACGAUCGAGUCGUCA	15	6,6,6,6,6,6,6,6,6,6,6,6,6,6,6	3mer,5mer,3mer,6mer,6mer,3mer,4mer,3mer,4mer,3mer,6mer,6mer,4mer,3mer,5mer	92,251,550,553,1014,1078,1241,1242,1313,1388,1532,1535,1592,1625,1732	A,A,C,A,A,G,G,A,C,G,C,C,A,A,U	3,2,2,0,2,2,2,2,2,2,2,1,2,2,1	2,2,1,0,1,1,1,1,1,2,1,1,1,1,1	2,2,2,2,1,2,2,2,2,3,1,1,2,1,2	2,1,1,1,1,2,1,1,2,1,1,1,1,1,1	0.45,0.3,0.5,0.55,0.4,0.5,0.55,0.6,0.45,0.4,0.4,0.4,0.6,0.55,0.6
>hsa-miR-221-5p	ACCUGGCAUACAAUGUAGAUUU	UUUAGAUGUAACAUACGGUCCA	15	6,6,6,6,6,6,6,6,6,6,7,6,6,6,6	4mer,5mer,4mer,3mer,4mer,3mer,6mer,5mer,2mer,5mer,7mer,3mer,3mer,3mer,6mer	130,244,637,638,881,882,1210,1211,1269,1299,1375,1376,1389,1661,1703	G,U,G,C,G,U,G,A,U,U,G,U,A,G,U	1,1,1,0,1,1,1,1,1,2,1,1,1,0,1	1,1,0,0,1,1,1,1,1,1,1,1,1,0,1	2,2,1,3,3,2,2,2,2,2,2,2,1,3,2	0,1,0,0,0,1,0,1,1,1,1,1,0,3,0	0.45,0.3,0.45,0.55,0.4,0.45,0.55,0.65,0.6,0.45,0.45,0.5,0.45,0.6,0.65
>hsa-miR-27b-5p	AGAGCUUAGCUGAUUGGUGAAC	CAAGUGGUUAGUCGAUUCGAGA	15	6,6,6,6,6,6,6,6,6,6,6,6,6,6,6	4mer,4mer,3mer,3mer,4mer,4mer,4mer,3mer,2mer,3mer,3mer,3mer,6mer,5mer,3mer	87,226,493,537,543,582,664,678,765,1020,1120,1140,1261,1262,1486	A,U,A,A,U,C,U,U,U,C,C,U,U,U,C	1,2,3,1,3,2,2,2,2,2,1,1,3,1,3	0,2,2,1,1,1,1,2,1,2,1,1,2,1,2	3,2,2,3,3,2,1,1,3,2,2,3,2,3,3	1,2,1,2,1,2,1,0,2,1,0,1,1,2,3	0.55,0.4,0.4,0.5,0.55,0.45,0.4,0.5,0.6,0.4,0.4,0.55,0.55,0.5,0.5
>hsa-miR-363-3p	AAUUGCACGGUAUCCAUCUGUA	AUGUCUACCUAUGGCACGUUAA	15	6,6,6,6,6,6,6,6,6,6,6,6,6,6,6	5mer,2mer,3mer,5mer,2mer,4mer,2mer,4mer,4mer,3mer,2mer,4mer,3mer,4mer,3mer	304,325,406,476,631,636,685,795,796,909,1210,1216,1561,1578,1677	C,U,G,C,G,G,G,U,U,G,G,C,G,U,U	3,3,2,2,1,2,3,2,1,1,3,1,1,2,2	1,0,1,2,1,2,1,1,0,1,1,1,1,1,1	1,1,2,1,1,2,2,1,1,1,3,2,1,2,2	1,1,1,1,1,2,1,1,1,1,1,1,1,2,1	0.65,0.7,0.6,0.45,0.35,0.45,0.55,0.6,0.65,0.45,0.55,0.55,0.5,0.55,0.6
>hsa-miR-376a-5p	GUAGAUUCUCCUUCUAUGAGUA	AUGAGUAUCUUCCUCUUAGAUG	15	6,6,6,6,6,6,6,6,6,6,6,6,6,7,6	5mer,4mer,2mer,2mer,2mer,3mer,4mer,3mer,3mer,4mer,5mer,5mer,5mer,6mer,4mer	31,308,434,438,618,680,757,811,1020,1164,1219,1238,1370,1478,1574	G,A,U,U,C,A,G,C,C,A,C,U,C,C,C	2,3,1,2,1,2,3,2,3,1,3,2,3,1,3	1,2,1,2,0,1,3,1,2,0,2,1,1,1,2	1,1,2,2,1,1,1,3,2,1,2,1,1,1,2	0,1,1,1,1,0,1,1,2,1,1,1,0,1,1	0.65,0.55,0.85,0.75,0.35,0.6,0.55,0.45,0.4,0.55,0.5,0.6,0.35,0.35,0.65
>hsa-miR-342-3p	UCUCACACAGAAAUCGCACCCGU	UGCCCACGCUAAAGACACACUCU	15	6,6,6,7,6,6,6,6,6,6,6,6,6,6,6	4mer,2mer,3mer,7mer,4mer,4mer,3mer,5mer,5mer,4mer,2mer,3mer,3mer,5mer,4mer	193,816,886,892,919,932,933,1005,1273,1303,1304,1329,1331,1380,1483	A,G,U,C,U,G,U,G,U,G,A,G,G,G,C	1,1,2,1,1,2,0,2,2,1,1,0,0,1,1	1,1,2,1,1,2,0,1,1,1,1,0,0,1,0	1,1,2,2,2,2,2,2,2,1,3,3,1,1,1	1,0,1,1,2,1,1,2,1,0,2,2,1,1,1	0.65,0.5,0.55,0.4,0.4,0.3,0.25,0.5,0.6,0.35,0.35,0.45,0.6,0.4,0.5
>hsa-miR-338-3p	UCCAGCAUCAGUGAUUUUGUUG	GUUGUUUUAGUGACUACGACCU	15	6,6,6,6,6,6,6,6,6,6,6,6,6,6,6	3mer,3mer,6mer,4mer,4mer,5mer,6mer,3mer,3mer,4mer,3mer,2mer,5mer,6mer,6mer	460,519,815,816,881,942,963,999,1067,1269,1303,1304,1483,1560,1750	C,U,G,G,G,G,C,G,G,U,G,A,C,U,U	3,1,1,1,2,3,2,2,2,2,2,2,2,1,3	2,1,0,1,1,2,1,1,2,2,1,1,1,1,2	1,1,2,2,2,2,4,2,2,2,2,1,2,3,1	1,1,2,2,1,1,1,1,1,1,2,0,2,1,1	0.55,0.55,0.45,0.5,0.4,0.4,0.5,0.35,0.45,0.6,0.35,0.35,0.5,0.45,0.7
>hsa-miR-339-5p	UCCCUGUCCUCCAGGAGCUCACG	GCACUCGAGGACCUCCUGUCCCU	15	7,7,6,6,6,6,6,6,6,6,6,6,6,6,6	7mer,7mer,3mer,6mer,4mer,5mer,5mer,5mer,6mer,6mer,3mer,5mer,5mer,3mer,4mer	131,137,138,157,176,472,632,686,1051,1107,1108,1252,1376,1594,1662	A,G,U,A,C,C,C,A,A,G,A,A,U,C,A	2,2,3,1,2,1,2,0,1,2,1,2,0,0,1	2,1,1,0,2,1,1,0,1,2,0,1,0,0,1	1,1,1,0,1,2,2,0,3,1,1,1,0,2,2	1,0,1,0,0,1,2,0,3,0,0,0,0,2,1	0.45,0.55,0.55,0.6,0.7,0.5,0.4,0.65,0.5,0.65,0.65,0.6,0.5,0.6,0.65
>hsa-miR-490-5p	CCAUGGAUCUCCAGGUGGGU	UGGGUGGACCUCUAGGUACC	15	6,6,6,6,6,6,6,6,6,6,6,6,6,6,6	3mer,3mer,5mer,2mer,6mer,5mer,2mer,3mer,3mer,3mer,2mer,5mer,2mer,3mer,5mer	74,191,384,429,481,482,637,671,770,791,1096,1158,1166,1461,1556	A,A,U,U,G,C,G,A,U,C,A,A,G,C,C	1,2,2,0,1,2,2,1,1,1,1,2,2,0,2	1,2,1,0,1,1,2,1,0,1,1,2,1,0,1	3,1,3,3,2,2,2,2,1,1,1,2,3,2,3	0,1,2,1,2,1,0,1,0,1,0,1,1,1,1	0.55,0.55,0.6,0.85,0.55,0.6,0.45,0.5,0.6,0.5,0.5,0.75,0.55,0.45,0.45
>hsa-miR-505-5p	GGGAGCCAGGAAGUAUUGAUGU	UGUAGUUAUGAAGGACCGAGGG	15	6,6,6,6,6,6,6,6,6,7,6,6,6,6,6	3mer,4mer,4mer,4mer,4mer,3mer,3mer,3mer,2mer,5mer,3mer,3mer,4mer,3mer,3mer	70,111,256,486,539,583,922,954,955,967,968,1059,1141,1552,1707	G,U,U,A,G,A,C,C,A,U,G,C,G,C,A	3,1,1,2,1,2,2,1,2,2,3,0,1,2,2	1,0,1,1,1,1,1,0,1,1,1,0,1,2,2	3,0,3,3,3,3,3,2,3,1,2,1,2,1,1	1,0,1,1,2,1,2,1,1,0,2,1,1,1,1	0.55,0.6,0.3,0.55,0.6,0.5,0.35,0.3,0.4,0.45,0.45,0.55,0.55,0.4,0.5
>hsa-miR-92b-3p	UAUUGCACUCGUCCCGGCCUCC	CCUCCGGCCCUGCUCACGUUAU	15	6,6,6,6,6,6,6,6,6,6,6,6,6,6,6	5mer,2mer,3mer,5mer,2mer,4mer,2mer,4mer,4mer,3mer,2mer,4mer,3mer,4mer,3mer	304,325,406,476,631,636,685,795,796,909,1210,1216,1561,1578,1677	C,U,G,C,G,G,G,U,U,G,G,C,G,U,U	1,3,1,2,3,2,2,2,2,2,1,2,2,1,2	1,1,1,1,1,1,2,1,1,1,1,1,1,0,1	2,0,2,0,1,2,2,1,1,1,3,2,1,1,1	1,0,1,0,0,2,1,0,0,0,2,1,1,1,1	0.65,0.7,0.6,0.45,0.35,0.45,0.55,0.6,0.65,0.45,0.55,0.55,0.5,0.55,0.6
>hsa-miR-590-3p	UAAUUUUAUGUAUAAGCUAGU	UGAUCGAAUAUGUAUUUUAAU	15	6,6,6,6,6,6,6,6,6,6,6,6,6,6,6	3mer,3mer,3mer,5mer,3mer,2mer,2mer,3mer,3mer,4mer,4mer,4mer,3mer,3mer,5mer	187,313,334,400,492,697,997,1147,1151,1162,1203,1369,1477,1573,1655	G,A,C,G,C,U,G,G,A,C,U,G,G,G,G	2,2,2,2,2,3,2,1,3,2,2,2,2,2,1	1,1,0,1,1,1,2,0,1,1,0,1,1,1,1	1,1,2,1,3,2,1,1,2,1,1,1,3,2,1	0,1,1,1,1,1,1,0,2,1,1,1,1,1,0	0.55,0.5,0.45,0.55,0.45,0.5,0.35,0.4,0.5,0.65,0.45,0.35,0.3,0.6,0.45
>hsa-miR-1301-3p	UUGCAGCUGCCUGGGAGUGACUUC	CUUCAGUGAGGGUCCGUCGACGUU	15	6,6,6,6,6,6,6,6,6,6,6,6,6,7,6	4mer,2mer,4mer,5mer,2mer,3mer,5mer,5mer,4mer,3mer,3mer,4mer,4mer,5mer,5mer	403,462,584,610,956,1013,1141,1142,1319,1534,1537,1658,1674,1734,1752	A,C,G,C,C,G,G,A,A,G,A,A,A,C,U	2,3,1,4,0,2,1,1,2,1,2,0,1,1,2	1,2,0,4,0,1,1,1,1,1,2,0,0,1,1	1,1,1,3,2,1,3,3,1,2,2,1,0,4,0	1,1,0,2,2,0,1,2,1,1,2,1,0,3,0	0.55,0.55,0.5,0.55,0.4,0.4,0.55,0.6,0.35,0.35,0.4,0.45,0.65,0.55,0.8
>hsa-miR-99a-3p	CAAGCUCGCUUCUAUGGGUCUG	GUCUGGGUAUCUUCGCUCGAAC	14	6,6,6,6,6,6,6,6,6,6,6,6,6,6	3mer,4mer,5mer,3mer,3mer,3mer,2mer,4mer,4mer,4mer,4mer,4mer,4mer,3mer	79,374,582,697,733,734,797,826,874,875,895,896,966,1517	G,A,C,U,U,C,G,G,U,G,U,U,C,C	1,2,1,1,1,3,2,3,2,2,3,2,2,2	0,0,1,1,0,2,2,1,1,0,1,1,1,1	2,1,2,3,3,1,2,2,1,2,3,3,2,3	1,1,1,1,1,1,1,1,1,2,1,1,0,2	0.45,0.5,0.45,0.5,0.5,0.5,0.65,0.6,0.4,0.35,0.4,0.35,0.45,0.6
>hsa-miR-103a-3p	AGCAGCAUUGUACAGGGCUAUGA	AGUAUCGGGACAUGUUACGACGA	14	6,7,6,6,6,6,6,6,6,6,7,6,6,6	4mer,3mer,2mer,4mer,3mer,4mer,5mer,6mer,5mer,3mer,7mer,5mer,5mer,5mer	66,460,461,795,954,964,1140,1560,1561,1747,1750,1751,1753,1754	U,C,A,U,C,U,U,U,G,U,U,G,C,U	3,3,2,3,2,1,2,2,2,2,3,3,3,2	1,2,1,1,1,1,1,1,2,1,1,1,1,1	1,2,0,2,2,3,1,0,1,1,1,0,0,2	1,1,0,0,1,2,0,0,1,0,1,0,0,2	0.6,0.55,0.6,0.6,0.3,0.45,0.55,0.45,0.5,0.65,0.7,0.7,0.75,0.75
>hsa-miR-107	AGCAGCAUUGUACAGGGCUAUCA	ACUAUCGGGACAUGUUACGACGA	14	6,7,6,6,6,6,6,6,6,6,7,6,6,6	4mer,3mer,2mer,4mer,3mer,4mer,5mer,6mer,5mer,3mer,7mer,5mer,5mer,5mer	66,460,461,795,954,964,1140,1560,1561,1747,1750,1751,1753,1754	U,C,A,U,C,U,U,U,G,U,U,G,C,U	3,3,2,3,2,1,2,2,2,2,3,3,3,2	1,2,1,1,1,1,1,1,2,1,1,1,1,1	1,2,0,2,2,3,1,0,1,1,1,0,0,2	1,1,0,0,1,2,0,0,1,0,1,0,0,2	0.6,0.55,0.6,0.6,0.3,0.45,0.55,0.45,0.5,0.65,0.7,0.7,0.75,0.75
>hsa-miR-148a-3p	UCAGUGCACUACAGAACUUUGU	UGUUUCAAGACAUCACGUGACU	14	6,6,6,6,6,6,6,6,6,6,6,6,6,6	3mer,2mer,4mer,4mer,3mer,3mer,3mer,3mer,5mer,3mer,3mer,3mer,4mer,3mer	65,298,477,608,757,767,876,941,959,1142,1316,1466,1541,1752	C,G,C,C,G,A,C,G,C,A,A,C,G,U	2,1,2,3,2,2,2,2,1,2,2,1,1,2	1,1,2,2,1,1,1,1,1,2,1,1,0,1	2,2,0,2,1,3,2,2,2,2,0,3,0,0	1,1,0,1,1,3,1,1,1,2,0,3,0,0	0.6,0.45,0.5,0.6,0.55,0.65,0.35,0.35,0.45,0.6,0.5,0.55,0.4,0.8
>hsa-miR-223-3p	UGUCAGUUUGUCAAAUACCCCA	ACCCCAUAAACUGUUUGACUGU	14	6,6,7,6,6,6,6,6,7,6,6,6,6,6	2mer,4mer,5mer,4mer,4mer,5mer,4mer,3mer,5mer,4mer,4mer,3mer,3mer,3mer	108,127,253,611,628,823,824,1150,1318,1484,1544,1627,1735,1745	U,A,U,A,A,C,A,U,A,C,G,U,C,G	1,2,3,4,2,2,3,2,1,2,3,1,2,2	1,1,1,2,1,0,1,1,0,1,1,0,2,1	1,1,0,1,4,1,2,2,1,1,0,0,1,2	0,1,0,1,4,1,1,1,0,1,0,0,1,1	0.45,0.4,0.3,0.55,0.45,0.55,0.55,0.5,0.35,0.55,0.35,0.6,0.65,0.45
>hsa-miR-152-3p	UCAGUGCAUGACAGAACUUGG	GGUUCAAGACAGUACGUGACU	14	6,6,6,6,6,6,6,6,6,6,6,6,6,6	3mer,2mer,4mer,4mer,3mer,3mer,3mer,3mer,5mer,3mer,3mer,3mer,4mer,3mer	65,298,477,608,757,767,876,941,959,1142,1316,1466,1541,1752	C,G,C,C,G,A,C,G,C,A,A,C,G,U	1,3,2,2,2,2,3,1,2,1,3,2,2,1	1,2,1,1,1,1,1,1,1,0,1,1,2,1	2,2,0,2,1,3,2,2,2,2,0,3,0,0	1,1,0,1,1,3,1,1,1,2,0,3,0,0	0.6,0.45,0.5,0.6,0.55,0.65,0.35,0.35,0.45,0.6,0.5,0.55,0.4,0.8
>hsa-miR-125a-3p	ACAGGUGAGGUUCUUGGGAGCC	CCGAGGGUUCUUGGAGUGGACA	14	6,6,6,6,6,6,6,6,6,6,6,6,6,6	3mer,3mer,5mer,3mer,3mer,5mer,3mer,5mer,5mer,3mer,5mer,3mer,3mer,3mer	57,92,118,251,365,508,599,748,1078,1219,1426,1459,1559,1732	U,A,G,A,G,A,A,G,G,C,A,U,A,U	2,3,2,1,2,2,1,2,4,2,3,2,2,2	0,1,2,1,2,1,1,1,3,0,1,1,2,2	1,2,2,1,2,3,1,3,3,1,2,2,3,2	0,0,0,1,2,1,0,2,1,0,1,0,2,1	0.65,0.45,0.6,0.3,0.5,0.55,0.3,0.6,0.5,0.5,0.55,0.45,0.5,0.6
>hsa-miR-99b-3p	CAAGCUCGUGUCUGUGGGUCCG	GCCUGGGUGUCUGUGCUCGAAC	14	6,6,6,6,6,6,6,6,6,6,6,6,6,6	3mer,4mer,5mer,3mer,3mer,3mer,2mer,4mer,4mer,4mer,4mer,4mer,4mer,3mer	79,374,582,697,733,734,797,826,874,875,895,896,966,1517	G,A,C,U,U,C,G,G,U,G,U,U,C,C	1,2,3,3,2,2,1,2,2,1,4,2,3,2	1,1,3,1,1,0,1,1,1,0,1,0,1,1	2,2,2,3,4,2,2,2,1,2,3,3,3,3	0,2,1,0,3,2,1,1,1,1,0,0,1,1	0.45,0.5,0.45,0.5,0.5,0.5,0.65,0.6,0.4,0.35,0.4,0.35,0.45,0.6
>hsa-miR-361-5p	UUAUCAGAAUCUCCAGGGGUAC	CAUGGGGACCUCUAAGACUAUU	14	6,6,6,6,6,6,6,6,7,6,6,6,6,6	4mer,4mer,5mer,4mer,5mer,5mer,3mer,4mer,6mer,3mer,3mer,4mer,5mer,3mer	60,192,332,530,602,683,740,760,770,791,1272,1481,1562,1694	U,G,A,A,C,G,A,U,U,C,G,A,C,C	2,1,2,1,1,3,2,2,3,1,2,3,2,0	1,0,1,1,0,3,1,2,1,1,1,3,2,0	2,0,2,3,1,2,1,4,2,2,0,1,1,1	1,0,2,3,0,2,1,4,1,1,0,1,1,1	0.6,0.6,0.5,0.5,0.4,0.55,0.5,0.55,0.6,0.5,0.6,0.45,0.55,0.6
>hsa-miR-148b-3p	UCAGUGCAUCACAGAACUUUGU	UGUUUCAAGACACUACGUGACU	14	6,6,6,6,6,6,6,6,6,6,6,6,6,6	3mer,2mer,4mer,4mer,3mer,3mer,3mer,3mer,5mer,3mer,3mer,3mer,4mer,3mer	65,298,477,608,757,767,876,941,959,1142,1316,1466,1541,1752	C,G,C,C,G,A,C,G,C,A,A,C,G,U	2,2,1,3,3,2,2,2,1,2,2,1,2,2	2,1,0,2,2,1,1,1,1,1,1,1,1,2	2,2,0,2,1,3,2,2,2,2,0,3,0,0	1,1,0,1,1,3,1,1,1,2,0,3,0,0	0.6,0.45,0.5,0.6,0.55,0.65,0.35,0.35,0.45,0.6,0.5,0.55,0.4,0.8
>hsa-miR-423-3p	AGCUCGGUCUGAGGCCCCUCAGU	UGACUCCCCGGAGUCUGGCUCGA	14	6,6,6,6,6,7,6,6,6,6,6,6,6,6	3mer,2mer,3mer,3mer,6mer,4mer,3mer,3mer,4mer,4mer,3mer,3mer,2mer,4mer	235,603,639,655,728,824,1137,1191,1348,1484,1485,1501,1563,1595	A,A,C,C,A,A,U,A,A,C,C,G,A,A	2,2,2,1,2,2,1,1,1,1,3,2,3,3	2,1,1,1,1,1,1,0,1,0,2,1,2,3	2,1,2,1,1,3,2,2,0,0,1,2,2,1	2,1,1,1,1,2,1,1,0,0,1,1,2,1	0.5,0.45,0.55,0.55,0.6,0.55,0.5,0.5,0.55,0.55,0.55,0.55,0.6,0.6
>hsa-miR-483-3p	UCACUCCUCUCCUCCCGUCUU	UUCUGCCCUCCUCUCCUCACU	14	6,6,6,6,6,6,6,6,6,6,6,6,6,6	3mer,2mer,6mer,3mer,3mer,3mer,3mer,3mer,3mer,3mer,5mer,3mer,3mer,6mer	140,141,732,821,888,890,1003,1054,1110,1291,1327,1358,1393,1718	G,G,U,A,U,A,A,A,A,A,G,C,A,A	3,2,1,2,2,3,1,1,2,0,1,2,1,2	3,2,1,1,1,2,0,1,1,0,1,2,1,2	1,2,0,0,1,1,1,0,2,2,2,3,2,0	0,1,0,0,1,1,0,0,1,1,1,2,2,0	0.5,0.55,0.55,0.55,0.5,0.5,0.45,0.55,0.65,0.55,0.4,0.55,0.45,0.45
>hsa-miR-503-5p	UAGCAGCGGGAACAGUUCUGCAG	GACGUCUUGACAAGGGCGACGAU	14	6,6,6,6,6,6,6,6,6,6,6,6,7,6	5mer,4mer,4mer,3mer,2mer,5mer,3mer,5mer,6mer,5mer,4mer,4mer,6mer,4mer	67,254,414,415,829,961,965,1129,1141,1463,1561,1748,1751,1755	U,C,U,U,U,G,U,C,G,C,G,G,G,A	2,2,1,1,1,3,2,3,1,3,1,0,1,3	1,2,0,1,1,2,1,2,1,2,1,0,1,1	2,2,1,2,1,3,2,1,3,1,2,2,1,2	1,1,0,1,0,1,1,1,2,1,1,2,1,1	0.5,0.3,0.8,0.75,0.65,0.45,0.45,0.4,0.55,0.55,0.5,0.6,0.7,0.7
>hsa-miR-628-5p	AUGCUGACAUAUUUACUAGAGG	GGAGAUCAUUUAUACAGUCGUA	14	6,6,6,7,6,6,6,6,6,6,6,6,6,6	2mer,6mer,5mer,7mer,5mer,4mer,4mer,4mer,4mer,4mer,4mer,5mer,3mer,5mer	35,250,251,552,553,873,894,978,1097,1240,1241,1279,1312,1732	A,G,A,A,A,U,U,C,C,A,G,A,G,U	1,1,1,1,2,1,3,2,3,3,2,3,2,1	1,1,0,1,2,1,1,1,1,2,1,1,0,1	2,0,1,1,1,3,2,1,2,3,3,2,2,1	1,0,1,0,0,2,1,1,1,1,1,1,1,1	0.75,0.3,0.3,0.65,0.55,0.5,0.45,0.4,0.45,0.55,0.55,0.5,0.5,0.6
>hsa-miR-543	AAACAUUCGCGGUGCACUUCUU	UUCUUCACGUGGCGCUUACAAA	14	6,6,6,6,6,6,7,6,6,6,6,6,6,6	5mer,2mer,3mer,5mer,3mer,2mer,7mer,5mer,5mer,4mer,4mer,2mer,6mer,2mer	54,86,320,458,502,734,764,772,829,1151,1301,1504,1574,1720	C,C,C,G,G,C,C,A,U,A,G,A,C,C	2,2,2,2,3,2,2,2,3,2,2,2,1,1	0,1,1,1,1,2,1,1,1,1,2,2,1,1	1,2,2,2,0,1,3,1,2,1,1,2,1,2	1,1,1,2,0,1,1,1,1,0,1,1,0,1	0.65,0.55,0.6,0.55,0.55,0.5,0.6,0.6,0.65,0.5,0.3,0.6,0.65,0.4
>hsa-miR-1307-3p	ACUCGGCGUGGCGUCGGUCGUG	GUGCUGGCUGCGGUGCGGCUCA	14	6,6,6,6,6,6,6,6,6,6,6,6,6,6	3mer,4mer,4mer,3mer,5mer,3mer,3mer,3mer,5mer,3mer,4mer,3mer,3mer,2mer	234,637,638,704,727,823,871,882,1135,1376,1389,1483,1548,1562	C,G,C,A,G,C,C,U,G,U,A,C,U,C	2,2,1,2,3,2,1,2,2,2,0,1,3,2	1,1,1,1,1,0,0,1,1,1,0,0,1,2	2,2,2,1,2,3,1,3,1,2,2,1,1,2	1,1,1,0,1,1,0,2,1,2,1,1,1,1	0.45,0.45,0.55,0.65,0.55,0.55,0.55,0.45,0.4,0.5,0.45,0.5,0.4,0.55
>hsa-miR-3620-3p	UCACCCUGCAUCCCGCACCCAG	GACCCACGCCCUACGUCCCACU	14	6,6,6,6,6,6,6,6,6,6,6,6,7,6	3mer,3mer,5mer,5mer,5mer,3mer,5mer,5mer,5mer,4mer,4mer,4mer,7mer,3mer	141,319,344,884,888,890,928,935,1003,1054,1082,1291,1378,1502	G,U,U,G,U,A,U,A,A,A,G,A,A,A	2,1,0,1,2,2,3,4,1,1,0,2,1,1	2,1,0,1,1,1,1,2,1,1,0,1,1,1	3,2,0,1,2,2,3,2,2,1,1,1,0,1	2,1,0,1,1,2,1,1,1,1,1,1,0,1	0.55,0.6,0.7,0.45,0.5,0.5,0.35,0.25,0.45,0.55,0.4,0.55,0.35,0.6
>hsa-miR-642b-3p	AGACACAUUUGGAGAGGGACCC	CCCAGGGAGAGGUUUACACAGA	14	6,6,7,6,6,6,6,6,6,6,6,6,6,6	3mer,3mer,6mer,5mer,3mer,3mer,4mer,3mer,3mer,5mer,3mer,3mer,5mer,4mer	59,62,321,322,411,772,831,914,921,930,974,1275,1576,1754	G,C,C,A,G,A,U,G,U,G,A,A,A,U	2,1,2,4,3,1,1,3,1,2,2,3,2,2	1,1,1,1,3,0,0,1,0,1,1,1,1,0	2,1,1,1,2,1,2,2,1,1,2,3,1,1	1,1,0,1,1,1,2,2,0,0,2,2,1,0	0.6,0.5,0.65,0.7,0.7,0.6,0.6,0.35,0.4,0.35,0.5,0.6,0.6,0.75
>hsa-miR-203b-5p	UAGUGGUCCUAAACAUUUCACA	ACACUUUACAAAUCCUGGUGAU	14	6,6,6,6,6,6,6,6,6,6,6,6,6,6	4mer,3mer,4mer,4mer,4mer,3mer,2mer,3mer,2mer,2mer,5mer,4mer,3mer,3mer	238,257,278,282,364,607,616,813,875,896,958,980,1057,1519	C,C,C,C,G,G,U,G,G,U,G,C,C,C	0,1,1,1,2,2,2,1,1,2,2,2,2,1	0,0,1,1,2,1,1,0,0,1,1,1,1,0	3,1,0,2,1,2,1,1,2,3,0,1,0,1	2,0,0,2,0,1,0,0,1,2,0,1,0,1	0.3,0.35,0.45,0.45,0.5,0.55,0.4,0.4,0.35,0.35,0.4,0.45,0.55,0.6
>hsa-miR-499b-5p	ACAGACUUGCUGUGAUGUUCA	ACUUGUAGUGUCGUUCAGACA	14	6,6,6,6,6,6,6,6,6,6,6,6,6,6	3mer,4mer,4mer,2mer,3mer,3mer,4mer,4mer,5mer,3mer,4mer,3mer,4mer,4mer	248,329,680,699,798,799,924,999,1020,1139,1277,1302,1370,1478	C,A,A,C,G,C,G,G,C,C,A,G,C,C	2,2,2,2,1,3,2,2,2,2,4,3,2,2	1,1,0,1,1,2,0,2,2,1,1,2,2,2	1,2,2,1,2,3,1,2,1,1,2,3,3,1	0,1,1,1,2,1,0,1,0,1,1,0,1,1	0.3,0.65,0.6,0.55,0.6,0.55,0.4,0.35,0.4,0.5,0.55,0.3,0.35,0.35
>hsa-miR-28-5p	AAGGAGCUCACAGUCUAUUGAG	GAGUUAUCUGACACUCGAGGAA	13	6,6,6,6,6,6,6,6,6,7,6,6,6	3mer,5mer,3mer,5mer,4mer,3mer,4mer,3mer,3mer,5mer,2mer,3mer,3mer	44,112,227,257,584,598,900,968,1141,1263,1519,1553,1755	U,A,C,C,G,G,C,G,G,G,C,A,A	1,1,1,1,1,1,1,2,0,1,1,2,2	1,1,1,1,1,1,1,2,0,1,1,1,2	3,2,2,3,1,3,3,2,2,3,2,1,2	1,2,1,1,1,2,0,2,1,3,1,0,1	0.6,0.55,0.35,0.35,0.5,0.35,0.4,0.45,0.55,0.5,0.6,0.4,0.7
>hsa-miR-214-5p	UGCCUGUCUACACUUGCUGUGC	CGUGUCGUUCACAUCUGUCCGU	13	6,6,6,6,6,6,6,6,6,6,6,6,6	6mer,6mer,4mer,4mer,5mer,4mer,4mer,5mer,3mer,3mer,3mer,2mer,4mer	131,137,359,372,455,473,633,1184,1386,1543,1595,1673,1704	A,G,A,U,G,A,C,A,G,C,A,A,U	1,1,2,2,1,1,3,1,3,0,1,2,1	1,0,1,1,1,0,2,1,2,0,0,1,1	3,2,2,2,2,1,1,2,4,3,3,3,3	0,1,1,1,2,0,1,2,2,2,3,1,1	0.45,0.55,0.6,0.55,0.65,0.5,0.35,0.55,0.4,0.3,0.6,0.65,0.6
>hsa-miR-146a-5p	UGAGAACUGAAUUCCAUGGGUU	UUGGGUACCUUAAGUCAAGAGU	13	6,6,6,6,6,6,6,6,7,6,6,6,6	3mer,5mer,3mer,6mer,3mer,5mer,3mer,2mer,4mer,4mer,3mer,5mer,5mer	63,66,87,329,415,495,524,666,735,923,1263,1520,1553	U,U,A,A,U,G,A,C,A,G,G,A,A	3,3,3,3,2,1,2,1,1,3,2,1,1	2,1,2,1,2,1,1,1,0,2,2,1,1	1,1,3,2,2,3,1,1,0,4,2,1,2	0,1,2,1,1,2,1,1,0,3,1,0,1	0.55,0.6,0.55,0.65,0.75,0.5,0.65,0.35,0.5,0.4,0.5,0.55,0.4
>hsa-miR-34b-5p	UAGGCAGUGUCAUUAGCUGAUUG	GUUAGUCGAUUACUGUGACGGAU	13	6,6,6,7,6,6,6,6,6,6,6,6,6	4mer,3mer,2mer,5mer,3mer,5mer,3mer,2mer,5mer,2mer,3mer,4mer,3mer	68,254,664,879,900,962,965,966,1130,1267,1465,1753,1755	C,C,U,G,C,G,U,C,C,G,G,C,A	3,1,2,3,3,3,2,0,1,2,1,2,3	1,1,1,1,1,2,1,0,1,1,0,2,2	2,3,2,2,2,2,3,2,1,3,2,1,3	0,1,1,1,1,0,1,1,1,1,2,1,1	0.5,0.3,0.4,0.35,0.4,0.45,0.45,0.45,0.35,0.5,0.55,0.75,0.7
>hsa-miR-342-5p	AGGGGUGCUAUCUGUGAUUGA	AGUUAGUGUCUAUCGUGGGGA	13	6,7,6,6,6,6,6,6,6,6,6,6,6	2mer,4mer,3mer,3mer,4mer,2mer,3mer,3mer,5mer,3mer,4mer,3mer,4mer	229,240,241,285,364,589,591,983,989,1040,1041,1073,1487	C,C,A,C,G,C,G,A,A,C,A,A,C	2,1,2,2,2,2,2,0,2,0,0,2,1	1,0,0,2,1,1,1,0,1,0,0,1,0	2,2,2,2,2,3,2,3,3,3,2,1,2	1,1,1,2,1,1,1,0,2,2,1,0,1	0.45,0.35,0.3,0.5,0.5,0.55,0.6,0.5,0.6,0.35,0.4,0.55,0.55
>hsa-miR-484	UCAGGCUCAGUCCCCUCCCGAU	UAGCCCUCCCCUGACUCGGACU	13	6,6,6,6,6,6,6,6,6,6,6,6,6	3mer,3mer,3mer,4mer,3mer,4mer,3mer,4mer,3mer,3mer,3mer,5mer,3mer	80,329,680,811,821,827,876,947,1020,1139,1277,1297,1478	A,A,A,C,A,U,C,U,C,C,A,U,C	3,2,1,1,2,4,3,3,2,1,2,3,1	1,1,0,1,1,4,1,2,1,1,1,1,1	0,2,1,2,1,3,1,2,2,1,1,1,1	0,1,1,2,1,3,1,1,1,1,1,1,1	0.5,0.65,0.6,0.45,0.55,0.65,0.35,0.35,0.4,0.5,0.55,0.5,0.35
>hsa-miR-146b-5p	UGAGAACUGAAUUCCAUAGGCUG	GUCGGAUACCUUAAGUCAAGAGU	13	6,6,6,6,6,6,6,6,7,6,6,6,6	3mer,5mer,3mer,6mer,3mer,5mer,3mer,2mer,4mer,4mer,3mer,5mer,5mer	63,66,87,329,415,495,524,666,735,923,1263,1520,1553	U,U,A,A,U,G,A,C,A,G,G,A,A	3,3,3,3,2,1,2,1,1,3,2,1,1	2,1,2,1,2,1,1,1,0,2,2,1,1	1,1,3,2,2,3,1,1,0,4,2,1,2	0,1,2,1,1,2,1,1,0,3,1,0,1	0.55,0.6,0.55,0.65,0.75,0.5,0.65,0.35,0.5,0.4,0.5,0.55,0.4
>hsa-miR-671-5p	AGGAAGCCCUGGAGGGGCUGGAG	GAGGUCGGGGAGGUCCCGAAGGA	13	6,6,6,6,6,6,6,6,6,7,6,6,6	6mer,5mer,4mer,5mer,3mer,4mer,4mer,2mer,2mer,6mer,4mer,4mer,3mer	70,376,478,539,598,666,667,898,955,968,1141,1519,1755	G,G,A,G,G,C,A,C,A,G,G,C,A	1,1,2,2,2,3,2,2,3,2,3,1,2	0,0,1,1,1,3,2,0,1,0,2,0,0	3,2,0,1,1,1,1,1,0,2,2,0,1	1,1,0,0,1,1,1,1,0,2,1,0,0	0.55,0.55,0.6,0.6,0.35,0.35,0.45,0.45,0.4,0.45,0.55,0.6,0.7
>hsa-miR-320b	AAAAGCUGGGUUGAGAGGGCAA	AACGGGAGAGUUGGGUCGAAAA	13	6,6,6,6,7,6,6,6,6,6,6,6,6	3mer,4mer,5mer,5mer,7mer,3mer,3mer,3mer,3mer,4mer,4mer,3mer,5mer	328,376,416,583,665,734,798,831,897,968,1263,1301,1733	G,G,U,A,C,C,G,U,C,G,G,G,A	3,2,1,3,1,1,3,3,2,3,2,3,2	1,1,0,2,1,0,2,1,0,1,1,1,1	1,2,1,1,1,2,3,1,1,2,0,1,2	1,2,1,0,1,1,2,0,1,1,0,0,1	0.65,0.55,0.65,0.5,0.4,0.5,0.6,0.6,0.35,0.45,0.5,0.3,0.6
>hsa-miR-320c	AAAAGCUGGGUUGAGAGGGU	UGGGAGAGUUGGGUCGAAAA	13	6,6,6,6,7,6,6,6,6,6,6,6,6	3mer,4mer,5mer,5mer,7mer,3mer,3mer,3mer,3mer,4mer,4mer,3mer,5mer	328,376,416,583,665,734,798,831,897,968,1263,1301,1733	G,G,U,A,C,C,G,U,C,G,G,G,A	3,2,1,3,1,1,3,3,2,3,2,3,2	1,1,0,2,1,0,2,1,0,1,1,1,1	1,2,1,1,1,2,3,1,1,2,0,1,2	1,2,1,0,1,1,2,0,1,1,0,0,1	0.65,0.55,0.65,0.5,0.4,0.5,0.6,0.6,0.35,0.45,0.5,0.3,0.6
>hsa-miR-708-5p	AAGGAGCUUACAAUCUAGCUGGG	GGGUCGAUCUAACAUUCGAGGAA	13	6,6,6,6,6,6,6,6,6,7,6,6,6	3mer,5mer,3mer,5mer,4mer,3mer,4mer,3mer,3mer,5mer,2mer,3mer,3mer	44,112,227,257,584,598,900,968,1141,1263,1519,1553,1755	U,A,C,C,G,G,C,G,G,G,C,A,A	2,1,2,1,1,1,1,2,1,2,2,2,2	1,1,1,1,1,1,1,2,1,1,1,1,2	2,1,2,2,1,2,3,1,1,3,2,1,2	1,1,1,1,1,2,1,1,0,3,1,0,1	0.6,0.55,0.35,0.35,0.5,0.35,0.4,0.45,0.55,0.5,0.6,0.4,0.7
>hsa-miR-1180-3p	UUUCCGGCUCGCGUGGGUGUGU	UGUGUGGGUGCGCUCGGCCUUU	13	6,6,6,6,6,6,6,6,6,6,6,7,6	4mer,4mer,3mer,3mer,3mer,4mer,4mer,4mer,2mer,4mer,3mer,5mer,4mer	121,236,369,729,751,760,862,1085,1145,1160,1279,1390,1391	G,C,G,G,U,U,U,C,A,U,A,A,U	2,1,2,2,3,2,2,2,1,1,4,2,3	1,0,1,1,2,1,2,1,1,0,2,1,2	3,3,1,2,1,3,1,2,3,2,2,2,2	1,2,0,1,1,1,1,1,2,0,1,0,1	0.5,0.4,0.55,0.65,0.65,0.55,0.5,0.45,0.5,0.75,0.5,0.45,0.45
>hsa-miR-320d	AAAAGCUGGGUUGAGAGGA	AGGAGAGUUGGGUCGAAAA	13	6,6,6,6,7,6,6,6,6,6,6,6,6	3mer,4mer,5mer,5mer,7mer,3mer,3mer,3mer,3mer,4mer,4mer,3mer,5mer	328,376,416,583,665,734,798,831,897,968,1263,1301,1733	G,G,U,A,C,C,G,U,C,G,G,G,A	3,2,1,3,1,1,3,3,2,3,2,3,2	1,1,0,2,1,0,2,1,0,1,1,1,1	1,2,1,1,1,2,3,1,1,2,0,1,2	1,2,1,0,1,1,2,0,1,1,0,0,1	0.65,0.55,0.65,0.5,0.4,0.5,0.6,0.6,0.35,0.45,0.5,0.3,0.6
>hsa-miR-3074-3p	GAUAUCAGCUCAGUAGGCACCG	GCCACGGAUGACUCGACUAUAG	13	6,6,6,6,6,6,7,6,6,6,6,6,6	3mer,3mer,3mer,4mer,3mer,3mer,5mer,4mer,2mer,3mer,5mer,4mer,3mer	61,312,457,520,691,761,771,772,976,1153,1563,1748,1753	U,U,U,C,G,G,U,A,C,C,A,G,C	3,1,1,1,2,2,2,1,2,1,2,1,3	3,1,0,1,2,1,2,1,1,1,1,1,2	1,2,2,3,1,2,1,2,2,0,3,0,2	1,1,2,2,0,0,1,1,0,0,1,0,1	0.55,0.5,0.65,0.55,0.5,0.55,0.6,0.6,0.45,0.55,0.6,0.6,0.75
>hsa-miR-23a-3p	AUCACAUUGCCAGGGAUUUCC	CCUUUAGGGACCGUUACACUA	12	6,6,6,6,6,6,6,6,6,6,6,6	3mer,4mer,4mer,3mer,3mer,3mer,4mer,5mer,4mer,4mer,3mer,6mer	194,320,504,519,531,744,773,891,1379,1503,1560,1575	A,C,C,U,A,C,U,G,G,U,U,U	2,1,1,0,1,1,2,2,3,1,2,1	1,0,1,0,1,1,1,2,2,1,1,1	2,2,3,2,2,3,1,2,2,2,1,2	1,1,1,1,1,0,0,1,1,1,0,1	0.65,0.6,0.55,0.55,0.4,0.55,0.6,0.4,0.3,0.55,0.45,0.6
>hsa-miR-27a-3p	UUCACAGUGGCUAAGUUCCGC	CGCCUUGAAUCGGUGACACUU	12	6,6,6,6,6,6,6,6,6,6,6,6	3mer,4mer,3mer,4mer,3mer,3mer,5mer,3mer,5mer,3mer,4mer,3mer	192,504,681,687,693,815,891,963,972,1143,1272,1482	G,C,C,C,A,G,G,C,U,A,G,G	0,1,1,1,3,2,3,2,4,1,2,2	0,1,0,0,2,1,1,1,2,0,0,0	2,3,2,1,1,1,2,3,2,1,3,1	1,1,1,1,0,1,2,2,1,1,2,1	0.6,0.55,0.55,0.6,0.5,0.45,0.4,0.5,0.5,0.55,0.6,0.45
>hsa-miR-197-3p	UUCACCACCUUCUCCACCCAGC	CGACCCACCUCUUCCACCACUU	12	6,6,6,6,6,6,6,6,6,6,6,6	6mer,5mer,4mer,3mer,5mer,5mer,3mer,6mer,5mer,3mer,4mer,4mer	504,870,885,918,975,1004,1233,1272,1273,1303,1331,1546	C,G,G,G,U,G,A,G,U,G,G,A	3,3,1,3,0,2,2,1,1,1,3,2	1,3,0,1,0,1,2,0,0,1,2,1	1,2,1,4,3,2,1,1,0,2,1,2	1,1,1,4,3,2,1,1,0,2,1,1	0.55,0.5,0.45,0.4,0.5,0.45,0.6,0.6,0.6,0.35,0.6,0.4
>hsa-miR-199a-5p	CCCAGUGUUCAGACUACCUGUUC	CUUGUCCAUCAGACUUGUGACCC	12	6,6,6,7,6,6,6,7,6,6,6,6	3mer,2mer,3mer,7mer,3mer,4mer,4mer,4mer,2mer,4mer,5mer,5mer	299,300,315,366,579,758,815,942,943,963,1542,1714	G,C,U,A,C,A,G,G,C,C,U,A	2,2,3,1,0,2,0,2,3,1,1,2	1,1,2,1,0,1,0,1,3,1,0,1	1,0,2,1,1,2,1,1,2,3,2,2	1,0,1,1,1,1,1,0,1,1,2,2	0.45,0.5,0.5,0.5,0.55,0.55,0.45,0.4,0.45,0.5,0.4,0.4
>hsa-miR-10a-5p	UACCCUGUAGAUCCGAAUUUGUG	GUGUUUAAGCCUAGAUGUCCCAU	12	6,6,6,6,6,6,6,6,6,6,6,6	6mer,6mer,4mer,6mer,2mer,3mer,3mer,6mer,5mer,6mer,5mer,6mer	132,138,139,158,929,1017,1030,1052,1053,1108,1290,1377	C,U,U,C,C,C,C,U,G,A,G,G	2,1,1,1,4,2,1,1,0,0,3,2	0,1,0,1,3,1,1,1,0,0,2,1	1,2,0,0,3,2,1,1,1,2,1,0	1,1,0,0,2,2,0,1,1,1,1,0	0.4,0.55,0.55,0.65,0.35,0.4,0.4,0.55,0.55,0.65,0.55,0.4
>hsa-miR-10b-5p	UACCCUGUAGAACCGAAUUUGUG	GUGUUUAAGCCAAGAUGUCCCAU	12	6,6,6,6,6,6,6,6,6,6,6,6	6mer,6mer,4mer,6mer,2mer,3mer,3mer,6mer,5mer,6mer,5mer,6mer	132,138,139,158,929,1017,1030,1052,1053,1108,1290,1377	C,U,U,C,C,C,C,U,G,A,G,G	1,0,0,1,3,1,1,1,0,0,2,2	0,0,0,1,3,1,1,1,0,0,2,1	1,2,0,0,3,2,1,1,1,2,1,0	1,1,0,0,2,2,0,1,1,1,1,0	0.4,0.55,0.55,0.65,0.35,0.4,0.4,0.55,0.55,0.65,0.55,0.4
>hsa-miR-199b-5p	CCCAGUGUUUAGACUAUCUGUUC	CUUGUCUAUCAGAUUUGUGACCC	12	6,6,6,7,6,6,6,7,6,6,6,6	3mer,2mer,3mer,7mer,3mer,4mer,4mer,4mer,2mer,4mer,5mer,5mer	299,300,315,366,579,758,815,942,943,963,1542,1714	G,C,U,A,C,A,G,G,C,C,U,A	3,2,3,1,1,2,1,2,3,1,2,2	1,1,2,0,1,1,1,0,1,1,1,1	1,0,2,1,1,2,1,1,2,3,2,2	1,0,1,1,1,1,1,0,1,1,2,2	0.45,0.5,0.5,0.5,0.55,0.55,0.45,0.4,0.45,0.5,0.4,0.4
>hsa-miR-23b-3p	AUCACAUUGCCAGGGAUUACCAC	CACCAUUAGGGACCGUUACACUA	12	6,6,6,6,6,6,6,6,6,6,6,6	3mer,4mer,4mer,3mer,3mer,3mer,4mer,5mer,4mer,4mer,3mer,6mer	194,320,504,519,531,744,773,891,1379,1503,1560,1575	A,C,C,U,A,C,U,G,G,U,U,U	2,1,1,0,1,1,2,2,3,1,2,1	1,0,1,0,1,1,1,2,2,1,1,1	2,2,3,2,2,3,1,2,2,2,1,2	1,1,1,1,1,0,0,1,1,1,0,1	0.65,0.6,0.55,0.55,0.4,0.55,0.6,0.4,0.3,0.55,0.45,0.6
>hsa-miR-27b-3p	UUCACAGUGGCUAAGUUCUGC	CGUCUUGAAUCGGUGACACUU	12	6,6,6,6,6,6,6,6,6,6,6,6	3mer,4mer,3mer,4mer,3mer,3mer,5mer,3mer,5mer,3mer,4mer,3mer	192,504,681,687,693,815,891,963,972,1143,1272,1482	G,C,C,C,A,G,G,C,U,A,G,G	0,1,1,1,3,2,3,2,4,1,2,2	0,1,0,0,2,1,1,1,2,0,0,0	2,3,2,1,1,1,2,3,2,1,3,1	1,1,1,1,0,1,2,2,1,1,2,1	0.6,0.55,0.55,0.6,0.5,0.45,0.4,0.5,0.5,0.55,0.6,0.45
>hsa-miR-125b-5p	UCCCUGAGACCCUAACUUGUGA	AGUGUUCAAUCCCAGAGUCCCU	12	6,6,6,6,6,6,6,6,6,7,6,6	3mer,3mer,5mer,4mer,3mer,2mer,2mer,4mer,3mer,7mer,2mer,3mer	342,497,905,906,927,928,935,1096,1167,1288,1345,1363	U,A,G,A,G,U,A,A,A,A,A,A	0,0,0,0,4,2,2,1,2,0,2,3	0,0,0,0,4,2,2,1,2,0,2,3	2,1,1,1,2,3,2,2,2,2,2,1	1,1,1,1,2,1,1,1,1,1,1,1	0.7,0.5,0.55,0.55,0.35,0.35,0.25,0.5,0.6,0.6,0.4,0.45
>hsa-miR-125b-1-3p	ACGGGUUAGGCUCUUGGGAGCU	UCGAGGGUUCUCGGAUUGGGCA	12	6,7,6,6,6,6,6,6,6,6,6,6	2mer,5mer,4mer,5mer,6mer,5mer,4mer,3mer,4mer,6mer,5mer,5mer	31,118,119,654,714,720,811,1286,1426,1497,1498,1588	G,G,A,C,A,C,C,G,A,G,A,G	2,2,2,2,1,3,1,2,2,2,2,2	1,2,1,1,0,2,1,2,1,1,1,1	1,2,2,3,1,2,3,2,2,1,1,1	0,0,0,3,1,1,0,1,1,0,1,0	0.65,0.6,0.6,0.45,0.45,0.4,0.45,0.5,0.55,0.45,0.55,0.5
>hsa-miR-135a-5p	UAUGGCUUUUUAUUCCUAUGUGA	AGUGUAUCCUUAUUUUUCGGUAU	12	6,6,7,6,6,6,6,6,6,6,6,6	3mer,2mer,3mer,3mer,4mer,3mer,4mer,5mer,4mer,5mer,3mer,6mer	296,297,433,475,847,948,1262,1297,1298,1415,1671,1702	U,G,A,U,G,G,U,U,G,A,G,G	0,0,1,2,4,2,3,2,3,3,3,2	0,0,1,1,2,0,1,1,1,2,1,2	0,0,1,2,1,2,2,2,2,0,2,1	0,0,1,1,1,2,1,1,0,0,1,0	0.45,0.4,0.85,0.45,0.7,0.35,0.5,0.5,0.4,0.55,0.55,0.65
>hsa-miR-140-5p	CAGUGGUUUUACCCUAUGGUAG	GAUGGUAUCCCAUUUUGGUGAC	12	7,6,6,6,6,6,6,6,6,6,6,6	5mer,4mer,4mer,2mer,3mer,5mer,4mer,4mer,2mer,3mer,3mer,4mer	278,282,364,616,813,958,980,1187,1239,1298,1540,1612	C,C,G,U,G,G,C,A,A,G,G,C	1,1,2,2,2,2,2,1,2,2,1,2	1,1,1,1,1,1,1,1,1,1,0,2	0,1,2,1,1,0,2,1,2,3,2,2	0,1,1,0,0,0,1,1,1,3,1,1	0.45,0.45,0.5,0.4,0.4,0.4,0.45,0.55,0.6,0.4,0.35,0.7
>hsa-miR-125a-5p	UCCCUGAGACCCUUUAACCUGUGA	AGUGUCCAAUUUCCCAGAGUCCCU	12	6,6,6,6,6,6,6,6,6,7,6,6	3mer,3mer,5mer,4mer,3mer,2mer,2mer,4mer,3mer,7mer,2mer,3mer	342,497,905,906,927,928,935,1096,1167,1288,1345,1363	U,A,G,A,G,U,A,A,A,A,A,A	0,0,0,0,4,2,2,1,2,0,2,3	0,0,0,0,4,2,2,1,2,0,2,3	4,1,3,2,2,3,1,3,2,3,3,3	2,1,1,1,1,1,0,2,1,1,2,1	0.7,0.5,0.55,0.55,0.35,0.35,0.25,0.5,0.6,0.6,0.4,0.45
>hsa-miR-150-5p	UCUCCCAACCCUUGUACCAGUG	GUGACCAUGUUCCCAACCCUCU	12	6,6,6,6,6,6,6,6,6,7,6,6	5mer,3mer,4mer,3mer,5mer,4mer,4mer,6mer,3mer,7mer,4mer,3mer	344,370,885,919,1002,1003,1008,1070,1273,1306,1331,1332	U,G,G,U,G,A,C,C,U,A,G,A	0,1,1,3,2,2,4,0,1,3,2,3	0,1,1,3,1,1,3,0,1,2,1,2	2,1,2,2,2,2,2,1,1,2,3,2	1,0,1,1,1,1,0,1,1,1,2,1	0.7,0.5,0.45,0.4,0.35,0.45,0.4,0.5,0.6,0.35,0.6,0.6
>hsa-miR-106b-3p	CCGCACUGUGGGUACUUGCUGC	CGUCGUUCAUGGGUGUCACGCC	12	6,6,6,6,6,6,6,6,6,6,6,6	4mer,6mer,6mer,4mer,4mer,3mer,3mer,3mer,5mer,4mer,3mer,3mer	319,474,634,635,798,871,931,938,1301,1302,1378,1502	U,U,G,U,G,C,G,C,G,G,A,A	1,1,2,1,2,1,4,3,0,1,2,1	1,1,1,0,0,0,1,1,0,1,1,1	2,0,1,1,1,2,2,2,2,3,1,0	1,0,0,0,1,1,1,1,1,1,1,0	0.6,0.5,0.4,0.4,0.6,0.55,0.3,0.35,0.3,0.3,0.35,0.6
>hsa-miR-299-5p	UGGUUUACCGUCCCACAUACAU	UACAUACACCCUGCCAUUUGGU	12	6,6,6,6,6,6,6,6,6,6,6,6	4mer,3mer,3mer,5mer,4mer,4mer,3mer,3mer,4mer,3mer,2mer,3mer	98,182,335,1119,1120,1283,1368,1403,1618,1684,1722,1763	C,A,C,C,C,C,U,C,U,C,U,U	2,2,1,1,3,2,1,3,1,1,1,1	1,1,1,0,2,1,1,2,1,1,0,0	1,1,1,3,2,3,2,1,0,2,1,2	1,1,1,2,1,3,1,1,0,2,1,1	0.55,0.65,0.5,0.35,0.4,0.45,0.4,0.45,0.6,0.65,0.4,0.55
>hsa-miR-324-5p	CGCAUCCCCUAGGGCAUUGGUG	GUGGUUACGGGAUCCCCUACGC	12	6,6,6,6,6,6,6,6,6,6,6,6	3mer,4mer,3mer,3mer,2mer,2mer,3mer,6mer,5mer,6mer,3mer,4mer	413,502,763,916,930,937,1004,1055,1056,1292,1359,1673	U,G,U,G,G,G,G,C,U,G,A,A	1,2,1,1,1,2,1,1,2,2,1,1	1,1,1,1,0,1,0,1,2,2,0,1	2,1,2,2,2,1,0,1,1,0,2,1	1,0,1,1,2,1,0,1,1,0,1,1	0.85,0.55,0.65,0.4,0.35,0.3,0.45,0.6,0.6,0.55,0.6,0.65
>hsa-miR-499a-5p	UUAAGACUUGCAGUGAUGUUU	UUUGUAGUGACGUUCAGAAUU	12	6,6,6,6,6,6,6,6,6,6,6,6	3mer,4mer,3mer,4mer,4mer,4mer,3mer,2mer,5mer,4mer,3mer,4mer	298,308,347,375,434,538,735,736,1093,1264,1302,1342	G,A,A,U,U,C,A,G,G,U,G,U	3,1,3,2,3,2,2,2,1,3,2,2	2,1,1,1,2,1,1,1,1,2,2,1	3,3,2,3,3,2,3,1,1,1,1,1	2,2,1,2,1,2,2,1,1,0,1,0	0.45,0.55,0.65,0.5,0.85,0.5,0.5,0.45,0.5,0.55,0.3,0.45
>hsa-miR-532-3p	CCUCCCACACCCAAGGCUUGCA	ACGUUCGGAACCCACACCCUCC	12	6,6,6,6,6,6,6,6,6,7,6,6	3mer,4mer,5mer,3mer,2mer,4mer,4mer,3mer,6mer,5mer,3mer,4mer	370,885,888,892,1001,1003,1008,1273,1306,1331,1332,1548	G,G,U,C,U,A,C,U,A,G,A,U	0,1,1,2,1,2,3,1,1,2,1,0	0,1,1,1,1,2,3,1,1,1,1,0	0,2,2,2,2,1,2,3,0,1,1,0	0,1,0,1,2,1,2,1,0,1,1,0	0.5,0.45,0.5,0.4,0.45,0.45,0.4,0.6,0.35,0.6,0.6,0.4
>hsa-miR-421	AUCAACAGACAUUAAUUGGGCGC	CGCGGGUUAAUUACAGACAACUA	12	6,6,6,6,6,6,6,6,6,6,6,6	3mer,6mer,5mer,3mer,3mer,3mer,3mer,3mer,3mer,5mer,4mer,3mer	48,61,75,192,815,963,1143,1269,1272,1303,1304,1482	A,U,G,G,G,C,A,U,G,G,A,G	2,3,2,1,1,1,2,2,3,1,0,2	1,2,1,1,0,0,1,1,3,0,0,1	2,2,2,1,2,2,1,2,2,3,2,1	1,1,2,1,1,1,1,0,1,2,1,1	0.7,0.55,0.5,0.6,0.45,0.5,0.55,0.6,0.6,0.35,0.35,0.45
>hsa-miR-766-3p	ACUCCAGCCCCACAGCCUCAGC	CGACUCCGACACCCCGACCUCA	12	6,6,6,6,7,6,6,6,6,6,6,6	4mer,4mer,6mer,6mer,5mer,4mer,5mer,4mer,5mer,3mer,4mer,6mer	122,144,368,751,817,884,944,1306,1347,1430,1548,1716	A,A,A,U,A,G,C,A,C,A,U,U	1,3,1,1,0,2,2,2,1,0,1,1	1,3,1,1,0,1,2,1,1,0,1,1	2,1,2,3,0,0,2,0,1,1,1,2	2,1,1,2,0,0,1,0,1,0,1,1	0.5,0.5,0.55,0.65,0.55,0.45,0.4,0.35,0.45,0.6,0.4,0.45
>hsa-miR-877-5p	GUAGAGGAGAUGGCGCAGGG	GGGACGCGGUAGAGGAGAUG	12	6,6,6,6,6,6,6,6,6,6,6,6	3mer,3mer,4mer,5mer,5mer,3mer,5mer,4mer,3mer,5mer,5mer,4mer	113,209,527,545,788,814,903,1466,1521,1687,1729,1756	A,A,A,G,A,G,U,C,C,U,C,U	2,2,3,2,2,1,4,3,1,1,3,2	1,1,0,1,0,0,3,2,1,0,2,1	1,1,2,1,3,1,2,1,1,1,1,3	1,1,1,1,1,1,1,0,1,1,1,1	0.5,0.6,0.6,0.6,0.6,0.4,0.55,0.55,0.55,0.75,0.5,0.6
>hsa-miR-3184-3p	AAAGUCUCGCUCUCUGCCCCUCA	ACUCCCCGUCUCUCGCUCUGAAA	12	7,6,6,6,6,6,6,6,6,6,6,7	3mer,3mer,3mer,5mer,3mer,4mer,2mer,3mer,4mer,3mer,5mer,7mer	374,458,537,679,734,821,897,1072,1114,1139,1341,1517	A,G,A,G,C,A,C,C,A,C,A,C	2,3,2,2,1,1,1,1,2,1,2,2	1,2,2,1,0,1,0,0,1,1,1,2	1,2,1,2,1,1,4,2,1,2,3,2	1,1,0,1,1,1,1,1,1,1,1,1	0.5,0.55,0.5,0.55,0.5,0.55,0.35,0.55,0.45,0.5,0.4,0.6
>hsa-miR-18a-5p	UAAGGUGCAUCUAGUGCAGAUAG	GAUAGACGUGAUCUACGUGGAAU	11	6,6,6,6,6,6,6,6,6,6,6	4mer,3mer,3mer,3mer,2mer,2mer,3mer,3mer,3mer,4mer,2mer	206,228,307,617,665,698,797,829,1452,1453,1460	A,C,G,A,C,G,G,U,U,C,G	3,2,2,1,0,2,2,1,2,2,1	2,1,1,1,0,2,2,0,1,1,1	1,1,2,2,1,2,2,1,2,2,2	0,0,1,2,1,0,1,0,2,2,0	0.65,0.45,0.55,0.4,0.4,0.5,0.65,0.65,0.55,0.5,0.45
>hsa-miR-22-3p	AAGCUGCCAGUUGAAGAACUGU	UGUCAAGAAGUUGACCGUCGAA	11	6,6,6,6,6,6,6,6,7,6,6	5mer,3mer,4mer,4mer,4mer,3mer,3mer,3mer,7mer,6mer,2mer	250,414,607,796,797,829,965,1141,1315,1386,1678	G,U,G,U,G,U,U,G,G,G,A	1,3,1,1,2,1,3,1,2,2,3	1,2,0,0,1,0,3,1,1,0,1	2,1,3,2,2,0,3,2,1,1,0	2,0,2,0,2,0,1,2,0,1,0	0.3,0.8,0.55,0.65,0.65,0.65,0.45,0.55,0.45,0.4,0.65
>hsa-miR-31-5p	AGGCAAGAUGCUGGCAUAGCU	UCGAUACGGUCGUAGAACGGA	11	6,6,6,6,6,6,6,7,6,6,6	5mer,5mer,3mer,5mer,3mer,5mer,5mer,5mer,4mer,3mer,4mer	310,461,548,701,702,878,1207,1266,1267,1463,1468	A,A,A,C,A,U,A,U,G,C,A	3,1,1,2,1,2,3,1,3,1,2	2,1,1,1,0,1,2,1,3,1,0	1,0,3,1,2,1,1,2,1,2,2	1,0,1,0,0,1,1,1,0,1,1	0.6,0.6,0.5,0.65,0.6,0.4,0.55,0.5,0.5,0.55,0.65
>hsa-miR-16-2-3p	CCAAUAUUACUGUGCUGCUUUA	AUUUCGUCGUGUCAUUAUAACC	11	6,6,6,6,6,6,6,6,6,6,6	4mer,3mer,4mer,3mer,3mer,3mer,3mer,4mer,3mer,3mer,3mer	298,308,401,459,518,757,765,876,953,1302,1746	G,A,C,C,G,G,U,C,C,G,C	1,2,2,1,1,3,2,2,2,2,2	0,1,2,1,1,1,1,1,1,2,2	1,1,1,2,2,2,2,2,2,3,2	1,0,1,1,1,1,1,1,0,0,1	0.45,0.55,0.65,0.6,0.5,0.55,0.6,0.35,0.25,0.3,0.55
>hsa-miR-181a-5p	AACAUUCAACGCUGUCGGUGAGU	UGAGUGGCUGUCGCAACUUACAA	11	6,6,6,6,6,6,6,6,6,6,6	5mer,3mer,2mer,3mer,2mer,6mer,5mer,3mer,2mer,6mer,2mer	54,85,86,318,502,763,764,1233,1504,1573,1720	C,U,C,G,G,U,C,A,A,G,C	1,2,2,1,1,2,1,0,1,1,1	0,2,1,1,1,1,1,0,1,1,1	1,3,2,1,1,2,3,2,2,4,2	1,1,1,0,1,2,1,1,1,2,1	0.65,0.5,0.55,0.6,0.55,0.65,0.6,0.6,0.6,0.6,0.4
>hsa-miR-181b-5p	AACAUUCAUUGCUGUCGGUGGGU	UGGGUGGCUGUCGUUACUUACAA	11	6,6,6,6,6,6,6,6,6,6,6	5mer,3mer,2mer,3mer,2mer,6mer,5mer,3mer,2mer,6mer,2mer	54,85,86,318,502,763,764,1233,1504,1573,1720	C,U,C,G,G,U,C,A,A,G,C	2,1,1,2,2,1,2,2,2,3,2	0,0,1,1,2,0,1,1,1,1,1	1,3,2,1,1,2,3,2,2,4,2	1,1,1,0,1,2,1,1,1,2,1	0.65,0.5,0.55,0.6,0.55,0.65,0.6,0.6,0.6,0.6,0.4
>hsa-miR-181c-5p	AACAUUCAACCUGUCGGUGAGU	UGAGUGGCUGUCCAACUUACAA	11	6,6,6,6,6,6,6,6,6,6,6	5mer,3mer,2mer,3mer,2mer,6mer,5mer,3mer,2mer,6mer,2mer	54,85,86,318,502,763,764,1233,1504,1573,1720	C,U,C,G,G,U,C,A,A,G,C	0,4,3,1,0,2,0,1,0,0,1	0,4,1,0,0,1,0,1,0,0,1	2,1,2,2,2,3,1,2,2,2,2	1,1,0,0,0,1,1,1,1,2,1	0.65,0.5,0.55,0.6,0.55,0.65,0.6,0.6,0.6,0.6,0.4
>hsa-miR-210-3p	CUGUGCGUGUGACAGCGGCUGA	AGUCGGCGACAGUGUGCGUGUC	11	6,6,6,6,6,6,6,6,6,6,6	4mer,5mer,4mer,3mer,5mer,4mer,4mer,3mer,4mer,4mer,3mer	102,362,464,567,612,614,660,722,984,1028,1438	A,C,A,G,C,U,G,C,A,G,A	1,1,3,1,2,2,1,1,3,2,1	0,1,0,1,2,1,1,1,2,1,0	1,1,2,0,2,0,1,1,1,1,2	0,1,1,0,1,0,1,0,0,1,2	0.6,0.5,0.55,0.7,0.55,0.5,0.55,0.5,0.5,0.4,0.55
>hsa-miR-181a-3p	ACCAUCGACCGUUGAUUGUACC	CCAUGUUAGUUGCCAGCUACCA	11	6,6,6,6,6,6,6,6,6,6,6	4mer,4mer,4mer,5mer,5mer,3mer,2mer,3mer,3mer,3mer,3mer	192,193,482,501,519,870,871,885,906,972,1542	G,A,C,U,U,G,C,G,A,U,U	2,1,2,1,1,1,1,2,1,1,3	1,1,1,0,1,0,1,1,0,0,1	1,2,0,2,2,3,3,1,1,2,3	1,1,0,1,0,0,2,0,0,1,2	0.6,0.65,0.6,0.6,0.55,0.5,0.55,0.45,0.55,0.5,0.4
>hsa-miR-224-3p	AAAAUGGUGCCCUAGUGACUACA	ACAUCAGUGAUCCCGUGGUAAAA	11	6,6,6,6,6,6,6,6,6,6,6	3mer,6mer,3mer,3mer,4mer,5mer,5mer,5mer,3mer,4mer,4mer	45,279,339,436,437,617,897,1064,1065,1580,1690	U,A,G,U,A,A,C,U,G,C,G	0,0,1,0,2,1,1,2,1,2,1	0,0,1,0,1,1,1,1,1,1,1	1,2,2,2,3,1,2,1,3,2,4	0,1,1,1,1,1,0,0,1,1,2	0.6,0.5,0.65,0.8,0.8,0.4,0.35,0.45,0.35,0.5,0.65
>hsa-miR-128-3p	UCACAGUGAACCGGUCUCUUU	UUUCUCUGGCCAAGUGACACU	11	6,6,6,6,6,6,6,6,6,6,6	2mer,2mer,3mer,4mer,3mer,4mer,5mer,2mer,3mer,3mer,3mer	191,300,317,319,943,962,971,1066,1142,1562,1752	A,C,U,U,C,G,G,G,A,C,U	0,1,1,1,2,1,1,2,1,1,2	0,1,1,1,2,1,1,1,1,1,1	1,2,3,1,1,2,2,2,2,3,1	1,1,1,0,1,0,1,1,2,1,1	0.55,0.5,0.55,0.6,0.45,0.45,0.4,0.4,0.6,0.55,0.8
>hsa-miR-186-5p	CAAAGAAUUCUCCUUUUGGGCU	UCGGGUUUUCCUCUUAAGAAAC	11	6,6,6,6,6,6,6,6,6,6,6	5mer,4mer,4mer,2mer,2mer,3mer,3mer,3mer,3mer,2mer,2mer	45,339,416,420,421,831,832,833,834,836,837	U,G,U,U,A,U,U,U,A,U,A	2,3,3,1,1,3,3,1,2,1,1	1,2,1,1,0,3,2,1,1,0,1	2,0,2,3,3,2,2,1,3,2,2	0,0,2,1,0,1,1,0,2,1,1	0.6,0.65,0.65,0.65,0.6,0.6,0.65,0.65,0.6,0.6,0.6
>hsa-miR-378a-3p	ACUGGACUUGGAGUCAGAAGGC	CGGAAGACUGAGGUUCAGGUCA	11	6,6,6,6,6,6,6,6,6,6,6	3mer,6mer,3mer,3mer,2mer,2mer,3mer,3mer,3mer,2mer,5mer	248,324,329,495,496,546,568,585,925,1362,1709	C,U,A,G,G,U,A,C,G,G,A	3,2,2,3,2,2,3,3,2,1,3	3,0,1,2,1,1,2,1,0,0,2	3,2,3,2,3,3,2,2,3,1,1	2,1,1,1,1,1,1,2,1,1,1	0.3,0.7,0.65,0.5,0.5,0.6,0.8,0.6,0.35,0.45,0.5
>hsa-miR-331-5p	CUAGGUAUGGUCCCAGGGAUCC	CCUAGGGACCCUGGUAUGGAUC	11	6,6,6,6,6,6,6,6,6,6,6	4mer,2mer,4mer,3mer,2mer,5mer,4mer,3mer,2mer,3mer,4mer	118,207,508,578,600,720,748,788,1422,1687,1738	G,U,A,G,G,C,G,A,C,U,A	2,3,2,2,2,3,2,3,1,1,3	2,2,1,2,1,2,1,1,1,0,1	3,1,2,1,1,0,2,2,1,2,1	2,1,2,0,1,0,1,2,1,1,1	0.6,0.6,0.55,0.55,0.3,0.4,0.6,0.6,0.5,0.75,0.55
>hsa-miR-18b-5p	UAAGGUGCAUCUAGUGCAGUUAG	GAUUGACGUGAUCUACGUGGAAU	11	6,6,6,6,6,6,6,6,6,6,6	4mer,3mer,3mer,3mer,2mer,2mer,3mer,3mer,3mer,4mer,2mer	206,228,307,617,665,698,797,829,1452,1453,1460	A,C,G,A,C,G,G,U,U,C,G	3,2,2,1,0,2,2,1,2,2,1	2,1,1,1,0,2,2,0,1,1,1	1,1,2,2,1,2,2,1,2,2,2	0,0,1,2,1,0,1,0,2,2,0	0.65,0.45,0.55,0.4,0.4,0.5,0.65,0.65,0.55,0.5,0.45
>hsa-miR-490-3p	CAACCUGGAGGACUCCAUGCUG	GUCGUACCUCAGGAGGUCCAAC	11	6,6,6,6,6,6,6,6,6,6,7	5mer,3mer,6mer,6mer,3mer,4mer,5mer,3mer,5mer,3mer,7mer	79,187,246,626,929,952,1081,1301,1377,1550,1705	G,G,A,A,C,G,G,G,G,C,C	3,1,2,2,3,1,2,0,3,2,1	2,1,1,1,2,1,1,0,2,1,1	1,3,3,1,3,2,3,3,2,2,2	1,1,2,1,1,1,3,3,1,2,1	0.45,0.55,0.3,0.55,0.35,0.25,0.45,0.3,0.4,0.4,0.55
>hsa-miR-493-3p	UGAAGGUCUACUGUGUGCCAGG	GGACCGUGUGUCAUCUGGAAGU	11	6,6,6,6,6,6,6,6,6,6,6	3mer,3mer,4mer,3mer,3mer,2mer,3mer,5mer,2mer,5mer,2mer	45,279,339,666,698,700,1060,1454,1520,1613,1724	U,A,G,C,G,C,A,A,A,A,C	2,1,2,0,1,2,2,2,3,2,1	1,1,1,0,1,1,1,2,2,1,0	2,2,2,3,3,2,3,2,2,3,2	0,1,0,1,0,0,3,1,1,1,2	0.6,0.5,0.65,0.35,0.5,0.6,0.6,0.55,0.55,0.7,0.5
>hsa-miR-181d-5p	AACAUUCAUUGUUGUCGGUGGGU	UGGGUGGCUGUUGUUACUUACAA	11	6,6,6,6,6,6,6,6,6,6,6	5mer,3mer,2mer,3mer,2mer,6mer,5mer,3mer,2mer,6mer,2mer	54,85,86,318,502,763,764,1233,1504,1573,1720	C,U,C,G,G,U,C,A,A,G,C	2,2,1,2,2,2,2,2,2,3,3	0,1,0,1,2,1,1,1,1,1,2	1,3,2,1,1,2,3,2,2,4,2	1,1,1,0,1,2,1,1,1,2,1	0.65,0.5,0.55,0.6,0.55,0.65,0.6,0.6,0.6,0.6,0.4
>hsa-miR-505-3p	CGUCAACACUUGCUGGUUUCCU	UCCUUUGGUCGUUCACAACUGC	11	6,6,6,6,6,6,6,6,6,6,6	5mer,5mer,4mer,5mer,5mer,4mer,4mer,3mer,2mer,5mer,3mer	62,83,190,310,461,505,745,800,964,1304,1561	C,G,G,A,A,C,C,A,U,A,G	2,4,1,2,3,3,3,2,2,3,1	1,2,1,1,2,1,2,0,1,2,1	1,3,2,4,1,2,2,3,2,3,1	1,2,2,1,0,0,0,1,1,2,0	0.5,0.5,0.5,0.6,0.6,0.55,0.6,0.6,0.45,0.35,0.5
>hsa-miR-769-5p	UGAGACCUCUGGGUUCUGAGCU	UCGAGUCUUGGGUCUCCAGAGU	11	6,6,6,7,6,6,6,6,6,6,6	3mer,2mer,2mer,6mer,3mer,4mer,5mer,4mer,3mer,3mer,4mer	524,666,735,923,930,977,1020,1091,1263,1341,1707	A,C,A,G,G,A,C,C,G,A,A	2,3,2,3,2,3,1,2,2,1,1	1,3,1,0,1,1,0,0,0,1,0	2,3,2,2,2,2,4,2,2,3,2	1,1,1,0,0,1,2,0,1,1,2	0.65,0.35,0.5,0.4,0.35,0.5,0.4,0.45,0.5,0.4,0.5
>hsa-miR-378d	ACUGGACUUGGAGUCAGAAA	AAAGACUGAGGUUCAGGUCA	11	6,6,6,6,6,6,6,6,6,6,6	3mer,6mer,3mer,3mer,2mer,2mer,3mer,3mer,3mer,2mer,5mer	248,324,329,495,496,546,568,585,925,1362,1709	C,U,A,G,G,U,A,C,G,G,A	3,2,2,3,2,2,3,3,2,1,3	3,0,1,2,1,1,2,1,0,0,2	3,2,3,2,3,3,2,2,3,1,1	2,1,1,1,1,1,1,2,1,1,1	0.3,0.7,0.65,0.5,0.5,0.6,0.8,0.6,0.35,0.45,0.5
>hsa-miR-378c	ACUGGACUUGGAGUCAGAAGAGUGG	GGUGAGAAGACUGAGGUUCAGGUCA	11	6,6,6,6,6,6,6,6,6,6,6	3mer,6mer,3mer,3mer,2mer,2mer,3mer,3mer,3mer,2mer,5mer	248,324,329,495,496,546,568,585,925,1362,1709	C,U,A,G,G,U,A,C,G,G,A	3,2,2,3,2,2,3,3,2,1,3	3,0,1,2,1,1,2,1,0,0,2	3,2,3,2,3,3,2,2,3,1,1	2,1,1,1,1,1,1,2,1,1,1	0.3,0.7,0.65,0.5,0.5,0.6,0.8,0.6,0.35,0.45,0.5
>hsa-miR-4524a-3p	UGAGACAGGCUUAUGCUGCUAU	UAUCGUCGUAUUCGGACAGAGU	11	6,7,6,6,6,6,6,6,6,6,6	3mer,6mer,5mer,3mer,2mer,3mer,5mer,2mer,5mer,6mer,5mer	69,110,111,255,419,966,1268,1581,1635,1756,1757	C,C,U,C,U,C,G,A,C,U,C	2,1,2,0,1,1,2,1,3,1,2	0,1,1,0,0,1,1,0,1,0,2	3,1,1,2,2,2,2,1,1,3,1	1,1,1,1,0,0,1,1,1,2,1	0.6,0.5,0.6,0.25,0.7,0.45,0.5,0.5,0.55,0.6,0.5
>hsa-miR-17-5p	CAAAGUGCUUACAGUGCAGGUAG	GAUGGACGUGACAUUCGUGAAAC	10	6,6,6,6,6,6,6,6,6,6	3mer,3mer,3mer,4mer,5mer,3mer,3mer,3mer,3mer,3mer	418,437,617,665,698,797,829,830,898,1065	C,A,A,C,G,G,U,U,C,G	1,1,3,1,2,2,3,3,4,0	1,0,1,1,2,1,1,1,2,0	2,2,2,1,2,2,1,1,2,2	1,1,2,1,0,1,0,0,1,1	0.7,0.8,0.4,0.4,0.5,0.65,0.65,0.6,0.45,0.35
>hsa-miR-20a-5p	UAAAGUGCUUAUAGUGCAGGUAG	GAUGGACGUGAUAUUCGUGAAAU	10	6,6,6,6,6,6,6,6,6,6	3mer,3mer,3mer,4mer,5mer,3mer,3mer,3mer,3mer,3mer	418,437,617,665,698,797,829,830,898,1065	C,A,A,C,G,G,U,U,C,G	1,2,3,1,2,2,3,3,4,1	0,1,1,1,2,1,1,1,1,1	2,2,2,1,2,2,1,1,2,2	1,1,2,1,0,1,0,0,1,1	0.7,0.8,0.4,0.4,0.5,0.65,0.65,0.6,0.45,0.35
>hsa-miR-93-5p	CAAAGUGCUGUUCGUGCAGGUAG	GAUGGACGUGCUUGUCGUGAAAC	10	6,6,6,6,6,6,6,6,6,6	3mer,3mer,3mer,4mer,5mer,3mer,3mer,3mer,3mer,3mer	418,437,617,665,698,797,829,830,898,1065	C,A,A,C,G,G,U,U,C,G	3,2,3,2,1,1,2,2,3,2	0,2,2,2,0,1,1,0,1,1	3,2,2,2,2,2,1,1,1,3	1,1,2,1,0,1,0,0,0,1	0.7,0.8,0.4,0.4,0.5,0.65,0.65,0.6,0.45,0.35
>hsa-miR-106a-5p	AAAAGUGCUUACAGUGCAGGUAG	GAUGGACGUGACAUUCGUGAAAA	10	6,6,6,6,6,6,6,6,6,6	3mer,3mer,3mer,4mer,5mer,3mer,3mer,3mer,3mer,3mer	418,437,617,665,698,797,829,830,898,1065	C,A,A,C,G,G,U,U,C,G	1,1,3,1,2,2,3,3,4,0	1,0,1,1,2,1,1,1,2,0	2,2,2,1,2,2,1,1,2,2	1,1,2,1,0,1,0,0,1,1	0.7,0.8,0.4,0.4,0.5,0.65,0.65,0.6,0.45,0.35
>hsa-miR-181a-2-3p	ACCACUGACCGUUGACUGUACC	CCAUGUCAGUUGCCAGUCACCA	10	6,6,6,6,6,6,6,7,6,6	3mer,4mer,4mer,3mer,3mer,3mer,4mer,7mer,4mer,6mer	299,318,319,501,870,871,885,906,972,1097	G,G,U,U,G,C,G,A,U,C	2,1,2,1,1,1,2,1,1,2	1,0,2,0,0,1,1,0,0,0	1,2,3,1,3,2,1,1,2,1	1,1,1,0,1,1,1,1,1,1	0.45,0.6,0.6,0.6,0.5,0.55,0.45,0.55,0.5,0.45
>hsa-miR-224-5p	UCAAGUCACUAGUGGUUCCGUUUAG	GAUUUGCCUUGGUGAUCACUGAACU	10	6,6,6,6,6,6,6,6,6,6	3mer,3mer,3mer,4mer,4mer,4mer,4mer,3mer,3mer,3mer	57,412,459,508,680,692,748,915,967,1205	U,C,C,A,A,A,G,U,U,C	1,2,1,3,2,2,2,1,3,2	1,1,1,1,1,1,1,1,2,2	2,4,3,3,3,3,3,1,4,2	0,1,2,2,2,1,1,1,3,1	0.65,0.8,0.6,0.55,0.6,0.5,0.6,0.4,0.45,0.5
>hsa-miR-130a-3p	CAGUGCAAUGUUAAAAGGGCAU	UACGGGAAAAUUGUAACGUGAC	10	6,6,6,6,6,6,6,6,6,6	3mer,2mer,4mer,4mer,2mer,4mer,2mer,4mer,3mer,3mer	64,313,416,476,542,796,940,958,1579,1751	G,A,U,C,C,U,G,G,U,G	2,2,2,4,2,2,2,1,4,3	0,1,0,3,1,1,0,0,2,1	1,0,0,0,1,2,2,1,0,0	1,0,0,0,1,1,1,1,0,0	0.5,0.5,0.65,0.45,0.5,0.65,0.25,0.4,0.5,0.7
>hsa-miR-142-5p	CAUAAAGUAGAAAGCACUACU	UCAUCACGAAAGAUGAAAUAC	10	6,6,6,6,6,6,6,6,6,6	2mer,4mer,5mer,5mer,4mer,5mer,4mer,3mer,2mer,3mer	61,418,439,700,774,836,837,970,1265,1688	U,C,G,C,G,U,A,G,C,U	2,2,2,1,2,3,3,1,0,2	1,1,2,1,1,1,1,1,0,1	1,1,1,3,2,2,3,1,2,1	1,0,1,2,1,2,2,0,1,1	0.55,0.7,0.7,0.6,0.55,0.6,0.6,0.4,0.5,0.7
>hsa-miR-143-5p	GGUGCAGUGCUGCAUCUCUGGU	UGGUCUCUACGUCGUGACGUGG	10	6,6,6,7,6,6,6,6,6,6	4mer,3mer,4mer,7mer,4mer,3mer,5mer,4mer,3mer,3mer	404,463,475,611,824,957,1130,1659,1735,1736	A,A,U,A,A,U,C,G,C,A	2,1,3,2,2,2,2,1,1,1	2,1,2,1,1,1,1,1,1,0	1,2,1,1,1,1,1,1,1,1	1,2,1,1,0,1,1,1,1,1	0.55,0.55,0.45,0.55,0.55,0.35,0.35,0.4,0.65,0.6
>hsa-miR-144-5p	GGAUAUCAUCAUAUACUGUAAG	GAAUGUCAUAUACUACUAUAGG	10	6,6,6,6,6,6,6,6,6,6	3mer,4mer,3mer,3mer,4mer,4mer,3mer,4mer,3mer,2mer	313,436,486,521,745,755,977,1154,1579,1754	A,U,A,C,C,U,A,C,U,U	2,1,2,0,2,1,2,1,2,3	2,0,1,0,2,0,2,1,1,3	1,2,3,2,2,2,2,2,1,1	1,1,2,1,1,1,1,1,1,1	0.5,0.8,0.55,0.6,0.6,0.55,0.5,0.65,0.5,0.75
>hsa-miR-9-3p	AUAAAGCUAGAUAACCGAAAGU	UGAAAGCCAAUAGAUCGAAAUA	10	6,6,6,6,6,6,6,6,6,6	4mer,5mer,6mer,4mer,3mer,3mer,3mer,4mer,3mer,4mer	377,584,666,699,735,736,876,969,1264,1734	A,G,C,C,A,G,C,U,U,C	1,2,1,2,1,1,2,2,1,1	1,1,1,1,0,1,0,0,1,0	1,1,0,1,0,0,1,1,1,1	1,1,0,1,0,0,1,1,1,1	0.55,0.5,0.35,0.55,0.5,0.45,0.35,0.4,0.55,0.55
>hsa-miR-106b-5p	UAAAGUGCUGACAGUGCAGAU	UAGACGUGACAGUCGUGAAAU	10	6,6,6,6,6,6,6,6,6,6	3mer,3mer,3mer,4mer,5mer,3mer,3mer,3mer,3mer,3mer	418,437,617,665,698,797,829,830,898,1065	C,A,A,C,G,G,U,U,C,G	2,0,3,2,1,1,2,2,3,1	1,0,2,2,1,1,1,1,2,0	2,2,2,1,2,2,1,1,2,2	1,1,2,1,0,1,0,0,1,1	0.7,0.8,0.4,0.4,0.5,0.65,0.65,0.6,0.45,0.35
>hsa-miR-302a-3p	UAAGUGCUUCCAUGUUUUGGUGA	AGUGGUUUUGUACCUUCGUGAAU	10	6,6,6,6,6,6,7,6,6,6	4mer,5mer,3mer,4mer,3mer,4mer,4mer,3mer,4mer,2mer	227,239,797,828,829,876,897,1263,1341,1580	C,C,G,U,U,C,C,G,A,C	2,1,1,1,2,3,3,2,3,1	1,0,1,0,2,2,2,2,2,1	3,1,2,3,3,2,2,3,3,3	2,0,1,0,1,1,0,1,0,1	0.35,0.3,0.65,0.65,0.65,0.35,0.35,0.5,0.4,0.5
>hsa-miR-301a-3p	CAGUGCAAUAGUAUUGUCAAAGC	CGAAACUGUUAUGAUAACGUGAC	10	6,6,6,6,6,6,6,6,6,6	3mer,2mer,4mer,4mer,2mer,4mer,2mer,4mer,3mer,3mer	64,313,416,476,542,796,940,958,1579,1751	G,A,U,C,C,U,G,G,U,G	3,2,2,2,1,3,2,1,3,3	2,1,0,1,1,2,1,0,1,1	2,2,3,2,2,3,3,1,2,2	1,0,3,1,1,1,1,1,1,2	0.5,0.5,0.65,0.45,0.5,0.65,0.25,0.4,0.5,0.7
>hsa-miR-130b-3p	CAGUGCAAUGAUGAAAGGGCAU	UACGGGAAAGUAGUAACGUGAC	10	6,6,6,6,6,6,6,6,6,6	3mer,2mer,4mer,4mer,2mer,4mer,2mer,4mer,3mer,3mer	64,313,416,476,542,796,940,958,1579,1751	G,A,U,C,C,U,G,G,U,G	3,3,2,3,1,2,1,1,3,3	1,3,1,2,1,1,0,1,1,2	1,0,0,0,1,2,2,1,0,0	1,0,0,0,1,1,1,1,0,0	0.5,0.5,0.65,0.45,0.5,0.65,0.25,0.4,0.5,0.7
>hsa-miR-361-3p	UCCCCCAGGUGUGAUUCUGAUUU	UUUAGUCUUAGUGUGGACCCCCU	10	6,6,6,6,6,6,6,6,6,6	4mer,6mer,5mer,4mer,3mer,5mer,5mer,4mer,6mer,5mer	344,818,884,885,919,1002,1003,1306,1331,1332	U,C,G,G,U,G,A,A,G,A	2,1,3,3,2,2,3,1,2,2	1,1,1,1,0,1,1,1,0,1	2,2,2,2,2,0,1,3,1,1	2,0,1,0,0,0,1,1,1,1	0.7,0.5,0.45,0.45,0.4,0.35,0.45,0.35,0.6,0.6
>hsa-miR-302b-3p	UAAGUGCUUCCAUGUUUUAGUAG	GAUGAUUUUGUACCUUCGUGAAU	10	6,6,6,6,6,6,7,6,6,6	4mer,5mer,3mer,4mer,3mer,4mer,4mer,3mer,4mer,2mer	227,239,797,828,829,876,897,1263,1341,1580	C,C,G,U,U,C,C,G,A,C	2,1,1,1,2,3,3,2,3,1	1,0,1,0,2,2,2,2,2,1	3,1,2,3,3,2,2,3,3,3	2,0,1,0,1,1,0,1,0,1	0.35,0.3,0.65,0.65,0.65,0.35,0.35,0.5,0.4,0.5
>hsa-miR-302c-3p	UAAGUGCUUCCAUGUUUCAGUGG	GGUGACUUUGUACCUUCGUGAAU	10	6,6,6,6,6,6,7,6,6,6	4mer,5mer,3mer,4mer,3mer,4mer,4mer,3mer,4mer,2mer	227,239,797,828,829,876,897,1263,1341,1580	C,C,G,U,U,C,C,G,A,C	2,1,1,1,2,3,3,2,3,1	1,0,1,0,2,2,2,2,2,1	3,1,2,3,3,2,2,3,3,3	2,0,1,0,1,1,0,1,0,1	0.35,0.3,0.65,0.65,0.65,0.35,0.35,0.5,0.4,0.5
>hsa-miR-302d-3p	UAAGUGCUUCCAUGUUUGAGUGU	UGUGAGUUUGUACCUUCGUGAAU	10	6,6,6,6,6,6,7,6,6,6	4mer,5mer,3mer,4mer,3mer,4mer,4mer,3mer,4mer,2mer	227,239,797,828,829,876,897,1263,1341,1580	C,C,G,U,U,C,C,G,A,C	2,1,1,1,2,3,3,2,3,1	1,0,1,0,2,2,2,2,2,1	3,1,2,3,3,2,2,3,3,3	2,0,1,0,1,1,0,1,0,1	0.35,0.3,0.65,0.65,0.65,0.35,0.35,0.5,0.4,0.5
>hsa-miR-376c-3p	AACAUAGAGGAAAUUCCACGU	UGCACCUUAAAGGAGAUACAA	10	6,6,6,6,6,6,6,6,6,6	3mer,3mer,4mer,4mer,4mer,4mer,3mer,2mer,5mer,3mer	61,318,379,441,771,951,972,973,1690,1753	U,G,C,A,U,U,U,C,G,C	2,1,1,1,3,1,2,2,2,1	1,1,1,0,1,1,1,0,1,0	3,1,3,3,3,2,2,1,1,3	1,1,1,1,1,1,1,1,1,3	0.55,0.6,0.45,0.7,0.6,0.3,0.5,0.45,0.65,0.75
>hsa-miR-151a-5p	UCGAGGAGCUCACAGUCUAGU	UGAUCUGACACUCGAGGAGCU	10	6,6,6,6,6,6,6,6,6,6	3mer,4mer,6mer,3mer,5mer,5mer,2mer,3mer,6mer,5mer	74,232,259,340,902,903,1094,1521,1728,1729	A,G,C,G,G,U,U,C,G,C	2,2,1,1,2,1,2,2,2,0	2,1,0,1,1,1,1,1,2,0	3,1,2,3,2,2,3,1,1,3	1,0,1,3,0,1,1,1,0,2	0.55,0.5,0.45,0.65,0.45,0.55,0.5,0.55,0.5,0.5
>hsa-miR-335-5p	UCAAGAGCAAUAACGAAAAAUGU	UGUAAAAAGCAAUAACGAGAACU	10	6,6,6,6,6,6,6,6,7,6	3mer,2mer,3mer,3mer,5mer,3mer,3mer,3mer,7mer,3mer	47,48,377,418,546,969,971,1066,1264,1691	G,A,A,C,U,U,G,G,U,A	1,2,1,3,1,2,2,2,2,3	1,1,0,2,1,1,1,1,1,2	1,1,2,0,1,2,2,2,1,2	0,1,1,0,1,1,1,1,1,1	0.6,0.7,0.55,0.7,0.6,0.4,0.4,0.4,0.55,0.7
>hsa-miR-20b-5p	CAAAGUGCUCAUAGUGCAGGUAG	GAUGGACGUGAUACUCGUGAAAC	10	6,6,6,6,6,6,6,6,6,6	3mer,3mer,3mer,4mer,5mer,3mer,3mer,3mer,3mer,3mer	418,437,617,665,698,797,829,830,898,1065	C,A,A,C,G,G,U,U,C,G	1,2,3,1,1,1,3,3,4,1	0,1,2,1,1,1,3,2,3,1	2,2,2,1,2,2,1,1,2,2	1,1,2,1,0,1,0,0,1,1	0.7,0.8,0.4,0.4,0.5,0.65,0.65,0.6,0.45,0.35
>hsa-miR-451a	AAACCGUUACCAUUACUGAGUU	UUGAGUCAUUACCAUUGCCAAA	10	6,6,6,6,6,6,6,6,6,6	4mer,2mer,4mer,4mer,4mer,2mer,4mer,4mer,2mer,4mer	140,410,411,781,782,913,914,952,1151,1358	G,U,G,U,A,U,G,G,A,C	2,2,1,2,1,2,3,2,2,0	2,2,1,1,1,1,3,2,2,0	2,1,1,2,2,2,3,2,2,3	1,1,1,1,1,1,1,1,1,1	0.5,0.7,0.7,0.7,0.65,0.4,0.35,0.25,0.5,0.55
>hsa-miR-455-5p	UAUGUGCCUUUGGACUACAUCG	GCUACAUCAGGUUUCCGUGUAU	10	6,6,6,6,6,6,6,6,6,6	5mer,4mer,4mer,6mer,5mer,3mer,2mer,3mer,4mer,2mer	163,181,202,363,364,376,435,948,1030,1088	G,C,C,U,G,G,U,G,C,C	4,3,3,3,4,3,3,2,3,2	2,2,2,2,3,1,2,0,2,1	1,1,2,2,2,2,1,2,3,1	0,0,1,2,1,1,0,1,2,1	0.65,0.65,0.65,0.55,0.5,0.55,0.85,0.35,0.4,0.5
>hsa-miR-551b-3p	GCGACCCAUACUUGGUUUCAG	GACUUUGGUUCAUACCCAGCG	10	6,6,6,7,6,6,7,6,6,6	3mer,4mer,4mer,5mer,5mer,4mer,5mer,6mer,4mer,4mer	80,141,142,412,885,890,915,922,931,1003	A,G,A,C,G,A,U,C,G,A	2,2,2,1,1,2,3,3,2,1	2,1,1,1,1,1,1,1,1,1	2,2,2,4,2,3,1,3,1,2	0,1,1,1,1,2,1,1,0,1	0.5,0.55,0.6,0.8,0.45,0.5,0.4,0.35,0.3,0.45
>hsa-miR-584-5p	UUAUGGUUUGCCUGGGACUGAG	GAGUCAGGGUCCGUUUGGUAUU	10	6,6,6,6,6,6,6,6,6,6	3mer,3mer,2mer,6mer,4mer,3mer,2mer,4mer,5mer,2mer	149,164,185,278,434,515,693,715,1177,1240	A,A,U,C,U,A,A,A,G,A	2,2,4,1,2,2,3,1,2,2	0,1,4,1,2,0,1,1,1,1	1,0,1,3,3,2,1,3,2,2	0,0,0,2,1,1,0,2,1,0	0.4,0.6,0.6,0.45,0.85,0.45,0.5,0.4,0.45,0.55
>hsa-miR-550a-3p	UGUCUUACUCCCUCAGGCACAU	UACACGGACUCCCUCAUUCUGU	10	6,6,6,6,6,6,6,6,6,6	4mer,4mer,3mer,5mer,3mer,6mer,4mer,2mer,4mer,4mer	124,390,535,676,745,1244,1248,1275,1308,1515	G,A,U,U,C,A,A,A,G,U	0,1,2,1,2,1,2,1,1,1	0,1,2,0,2,1,1,0,1,1	2,2,1,2,2,3,2,3,2,2	1,2,1,2,1,3,1,2,1,2	0.45,0.75,0.55,0.5,0.6,0.6,0.65,0.6,0.4,0.65
>hsa-miR-660-5p	UACCCAUUGCAUAUCGGAGUUG	GUUGAGGCUAUACGUUACCCAU	10	6,7,6,6,7,6,6,6,6,6	2mer,7mer,5mer,5mer,7mer,5mer,5mer,4mer,4mer,4mer	320,410,411,887,913,914,920,934,1330,1357	C,U,G,G,U,G,C,G,G,U	1,2,1,0,3,2,3,3,1,1	0,2,0,0,2,1,1,1,1,0	2,2,2,0,1,2,3,1,2,3	0,2,1,0,1,1,2,0,2,1	0.6,0.7,0.7,0.5,0.4,0.35,0.4,0.25,0.5,0.65
>hsa-miR-151b	UCGAGGAGCUCACAGUCU	UCUGACACUCGAGGAGCU	10	6,6,6,6,6,6,6,6,6,6	3mer,4mer,6mer,3mer,5mer,5mer,2mer,3mer,6mer,5mer	74,232,259,340,902,903,1094,1521,1728,1729	A,G,C,G,G,U,U,C,G,C	2,2,1,1,2,1,2,2,2,0	2,1,0,1,1,1,1,1,2,0	3,1,2,3,2,2,3,1,1,3	1,0,1,3,0,1,1,1,0,2	0.55,0.5,0.45,0.65,0.45,0.55,0.5,0.55,0.5,0.5
>hsa-miR-454-3p	UAGUGCAAUAUUGCUUAUAGGGU	UGGGAUAUUCGUUAUAACGUGAU	10	6,6,6,6,6,6,6,6,6,6	3mer,2mer,4mer,4mer,2mer,4mer,2mer,4mer,3mer,3mer	64,313,416,476,542,796,940,958,1579,1751	G,A,U,C,C,U,G,G,U,G	2,2,2,3,2,2,2,1,4,3	1,2,0,1,1,1,0,0,3,2	2,2,1,1,2,2,3,0,2,2	1,0,1,1,1,1,1,0,1,2	0.5,0.5,0.65,0.45,0.5,0.65,0.25,0.4,0.5,0.7
>hsa-miR-874-5p	CGGCCCCACGCACCAGGGUAAGA	AGAAUGGGACCACGCACCCCGGC	10	6,6,6,6,6,6,6,6,6,6	5mer,4mer,3mer,4mer,3mer,4mer,2mer,5mer,4mer,4mer	819,820,921,922,930,946,974,1003,1071,1359	U,G,U,C,G,A,A,A,U,A	1,3,2,3,2,1,1,0,1,0	0,3,1,1,1,1,0,0,0,0	0,0,1,3,3,2,4,2,1,1	0,0,1,3,2,1,4,1,0,1	0.5,0.5,0.4,0.35,0.35,0.35,0.5,0.45,0.6,0.6
>hsa-miR-374c-3p	CACUUAGCAGGUUGUAUUAUAU	UAUAUUAUGUUGGACGAUUCAC	10	6,6,6,6,6,6,6,6,6,6	3mer,4mer,3mer,2mer,3mer,3mer,3mer,3mer,2mer,3mer	254,430,752,771,951,1017,1274,1484,1704,1717	C,C,A,U,U,C,C,C,U,G	3,2,1,3,1,2,4,4,2,1	1,0,0,1,0,1,2,2,2,1	2,2,3,2,2,2,2,2,3,2	1,1,1,1,1,1,1,1,1,0	0.3,0.85,0.6,0.6,0.3,0.4,0.55,0.55,0.6,0.45
>hsa-miR-7704	CGGGGUCGGCGGCGACGUG	GUGCAGCGGCGGCUGGGGC	10	6,6,6,6,6,6,6,6,6,6	2mer,3mer,3mer,5mer,3mer,4mer,4mer,3mer,4mer,2mer	240,256,257,989,1060,1073,1452,1486,1487,1724	C,U,C,A,A,A,U,C,C,C	3,3,2,2,2,2,0,4,3,2	3,2,1,1,1,0,0,2,1,1	2,0,2,2,2,2,1,1,1,2	2,0,1,2,1,2,1,1,0,1	0.35,0.3,0.35,0.6,0.6,0.55,0.55,0.5,0.55,0.5
>hsa-let-7a-5p	UGAGGUAGUAGGUUGUAUAGUU	UUGAUAUGUUGGAUGAUGGAGU	9	6,6,6,6,6,6,6,6,6	3mer,4mer,3mer,2mer,4mer,3mer,4mer,3mer,3mer	255,289,543,583,589,599,901,1453,1459	C,C,U,A,C,A,A,C,U	3,1,0,1,2,3,1,1,2	1,1,0,1,2,2,1,0,2	3,2,3,2,3,2,3,4,2	1,2,2,1,1,1,0,3,1	0.25,0.55,0.55,0.5,0.55,0.3,0.45,0.5,0.45
>hsa-let-7b-5p	UGAGGUAGUAGGUUGUGUGGUU	UUGGUGUGUUGGAUGAUGGAGU	9	6,6,6,6,6,6,6,6,6	3mer,4mer,3mer,2mer,4mer,3mer,4mer,3mer,3mer	255,289,543,583,589,599,901,1453,1459	C,C,U,A,C,A,A,C,U	3,1,0,1,2,3,1,1,2	1,1,0,1,2,2,1,0,2	3,2,3,2,3,2,3,4,2	1,2,2,1,1,1,0,3,1	0.25,0.55,0.55,0.5,0.55,0.3,0.45,0.5,0.45
>hsa-let-7c-5p	UGAGGUAGUAGGUUGUAUGGUU	UUGGUAUGUUGGAUGAUGGAGU	9	6,6,6,6,6,6,6,6,6	3mer,4mer,3mer,2mer,4mer,3mer,4mer,3mer,3mer	255,289,543,583,589,599,901,1453,1459	C,C,U,A,C,A,A,C,U	3,1,0,1,2,3,1,1,2	1,1,0,1,2,2,1,0,2	3,2,3,2,3,2,3,4,2	1,2,2,1,1,1,0,3,1	0.25,0.55,0.55,0.5,0.55,0.3,0.45,0.5,0.45
>hsa-let-7d-5p	AGAGGUAGUAGGUUGCAUAGUU	UUGAUACGUUGGAUGAUGGAGA	9	6,6,6,6,6,6,6,6,6	3mer,4mer,3mer,2mer,4mer,3mer,4mer,3mer,3mer	255,289,543,583,589,599,901,1453,1459	C,C,U,A,C,A,A,C,U	3,1,0,1,2,3,1,1,2	1,1,0,1,2,2,1,0,2	3,2,3,1,2,2,3,3,2	1,2,2,1,1,2,0,2,1	0.25,0.55,0.55,0.5,0.55,0.3,0.45,0.5,0.45
>hsa-let-7e-5p	UGAGGUAGGAGGUUGUAUAGUU	UUGAUAUGUUGGAGGAUGGAGU	9	6,6,6,6,6,6,6,6,6	3mer,4mer,3mer,2mer,4mer,3mer,4mer,3mer,3mer	255,289,543,583,589,599,901,1453,1459	C,C,U,A,C,A,A,C,U	2,2,1,2,3,2,0,0,3	1,1,0,1,2,2,0,0,2	3,2,3,2,3,2,3,4,2	1,2,2,1,1,1,0,3,1	0.25,0.55,0.55,0.5,0.55,0.3,0.45,0.5,0.45
>hsa-let-7f-5p	UGAGGUAGUAGAUUGUAUAGUU	UUGAUAUGUUAGAUGAUGGAGU	9	6,6,6,6,6,6,6,6,6	3mer,4mer,3mer,2mer,4mer,3mer,4mer,3mer,3mer	255,289,543,583,589,599,901,1453,1459	C,C,U,A,C,A,A,C,U	3,1,0,1,2,2,1,1,1	2,1,0,1,2,1,1,0,1	3,2,3,2,3,2,3,4,2	1,2,2,1,1,1,0,3,1	0.25,0.55,0.55,0.5,0.55,0.3,0.45,0.5,0.45
>hsa-miR-29a-3p	UAGCACCAUCUGAAAUCGGUUA	AUUGGCUAAAGUCUACCACGAU	9	6,6,6,6,6,6,6,6,6	2mer,5mer,4mer,4mer,4mer,2mer,4mer,4mer,4mer	62,86,346,414,523,772,1141,1748,1751	C,C,A,U,C,A,G,G,G	1,2,1,2,3,1,3,2,3	1,1,1,1,2,0,2,1,2	2,2,2,1,1,2,2,1,1	1,2,1,1,1,1,1,1,1	0.5,0.55,0.75,0.8,0.65,0.6,0.55,0.6,0.7
>hsa-miR-98-5p	UGAGGUAGUAAGUUGUAUUGUU	UUGUUAUGUUGAAUGAUGGAGU	9	6,6,6,6,6,6,6,6,6	3mer,4mer,3mer,2mer,4mer,3mer,4mer,3mer,3mer	255,289,543,583,589,599,901,1453,1459	C,C,U,A,C,A,A,C,U	2,1,0,0,1,2,1,1,1	0,1,0,0,1,1,1,0,1	3,2,3,2,3,2,3,4,2	1,2,2,1,1,1,0,3,1	0.25,0.55,0.55,0.5,0.55,0.3,0.45,0.5,0.45
>hsa-miR-29b-3p	UAGCACCAUUUGAAAUCAGUGUU	UUGUGACUAAAGUUUACCACGAU	9	6,6,6,6,6,6,6,6,6	2mer,5mer,4mer,4mer,4mer,2mer,4mer,4mer,4mer	62,86,346,414,523,772,1141,1748,1751	C,C,A,U,C,A,G,G,G	2,2,1,3,3,1,3,3,3	1,0,1,2,1,0,1,3,1	2,2,2,1,1,2,2,1,1	1,2,1,1,1,1,1,1,1	0.5,0.55,0.75,0.8,0.65,0.6,0.55,0.6,0.7
>hsa-miR-192-5p	CUGACCUAUGAAUUGACAGCC	CCGACAGUUAAGUAUCCAGUC	9	6,6,6,6,6,6,6,6,6	4mer,6mer,5mer,3mer,3mer,4mer,5mer,4mer,3mer	81,247,248,375,538,922,975,1276,1360	G,G,C,U,C,C,U,G,A	3,2,2,1,2,3,3,2,1	1,2,1,0,1,1,3,1,0	2,2,2,2,3,3,2,3,2	1,1,2,2,2,0,1,1,1	0.45,0.3,0.3,0.5,0.5,0.35,0.5,0.55,0.5
>hsa-miR-7-5p	UGGAAGACUAGUGAUUUUGUUGUU	UUGUUGUUUUAGUGAUCAGAAGGU	9	6,6,6,6,6,6,6,6,6	5mer,4mer,4mer,3mer,4mer,6mer,4mer,4mer,4mer	70,112,667,736,968,1093,1266,1519,1758	G,A,A,G,G,G,U,C,A	3,2,2,2,1,1,1,2,1	1,1,1,1,0,0,1,1,0	3,1,3,1,1,3,3,2,3	1,1,1,1,1,2,2,2,2	0.55,0.55,0.45,0.45,0.45,0.5,0.5,0.6,0.5
>hsa-miR-181c-3p	AACCAUCGACCGUUGAGUGGAC	CAGGUGAGUUGCCAGCUACCAA	9	6,7,6,6,6,6,6,6,6	6mer,6mer,4mer,3mer,5mer,4mer,2mer,4mer,4mer	502,520,772,887,951,973,1274,1543,1748	G,C,A,G,U,C,C,C,G	1,0,1,1,2,2,2,2,0	0,0,1,1,2,1,1,1,0	1,3,1,2,2,2,2,3,2	0,1,1,0,1,1,2,2,1	0.55,0.55,0.6,0.5,0.3,0.45,0.55,0.3,0.6
>hsa-miR-203a-3p	GUGAAAUGUUUAGGACCACUAG	GAUCACCAGGAUUUGUAAAGUG	9	6,6,6,6,6,6,7,6,6	4mer,2mer,4mer,5mer,6mer,4mer,6mer,5mer,4mer	427,438,479,736,899,1093,1582,1583,1692	A,U,U,G,U,G,A,C,A	1,2,3,3,4,2,2,2,1	1,1,1,1,1,2,0,1,1	3,2,1,1,2,2,2,1,2	1,2,1,1,1,1,1,0,1	0.75,0.75,0.55,0.45,0.5,0.5,0.4,0.45,0.6
>hsa-miR-212-3p	UAACAGUCUCCAGUCACGGCC	CCGGCACUGACCUCUGACAAU	9	6,6,6,6,6,6,6,6,6	5mer,3mer,2mer,4mer,4mer,4mer,3mer,5mer,4mer	59,109,190,346,764,829,1141,1543,1755	G,C,G,A,C,U,G,C,A	1,1,1,0,2,2,2,1,2	0,1,1,0,1,2,2,1,2	2,2,2,2,1,2,2,2,1	1,1,1,1,1,1,1,1,0	0.6,0.45,0.5,0.75,0.6,0.65,0.55,0.3,0.7
>hsa-let-7g-5p	UGAGGUAGUAGUUUGUACAGUU	UUGACAUGUUUGAUGAUGGAGU	9	6,6,6,6,6,6,6,6,6	3mer,4mer,3mer,2mer,4mer,3mer,4mer,3mer,3mer	255,289,543,583,589,599,901,1453,1459	C,C,U,A,C,A,A,C,U	2,1,1,2,3,2,2,2,1	1,1,0,2,2,1,1,1,1	3,2,3,2,3,2,3,4,2	1,2,2,1,1,1,0,3,1	0.25,0.55,0.55,0.5,0.55,0.3,0.45,0.5,0.45
>hsa-let-7g-3p	CUGUACAGGCCACUGCCUUGC	CGUUCCGUCACCGGACAUGUC	9	6,6,6,6,6,6,6,6,6	2mer,3mer,3mer,3mer,2mer,3mer,6mer,4mer,4mer	474,512,612,825,1564,1577,1736,1737,1756	U,A,C,U,A,U,A,A,U	1,3,1,2,2,1,1,2,1	1,2,1,2,2,1,1,2,1	2,3,3,3,1,3,1,1,2	2,1,2,2,1,2,0,1,1	0.5,0.45,0.55,0.6,0.5,0.6,0.6,0.5,0.6
>hsa-let-7i-5p	UGAGGUAGUAGUUUGUGCUGUU	UUGUCGUGUUUGAUGAUGGAGU	9	6,6,6,6,6,6,6,6,6	3mer,4mer,3mer,2mer,4mer,3mer,4mer,3mer,3mer	255,289,543,583,589,599,901,1453,1459	C,C,U,A,C,A,A,C,U	2,1,1,2,3,2,2,2,1	1,1,0,2,2,1,1,1,1	3,2,3,2,3,2,3,4,2	1,2,2,1,1,1,0,3,1	0.25,0.55,0.55,0.5,0.55,0.3,0.45,0.5,0.45
>hsa-miR-132-3p	UAACAGUCUACAGCCAUGGUCG	GCUGGUACCGACAUCUGACAAU	9	6,6,6,6,6,6,6,6,6	5mer,3mer,2mer,4mer,4mer,4mer,3mer,5mer,4mer	59,109,190,346,764,829,1141,1543,1755	G,C,G,A,C,U,G,C,A	2,1,2,1,3,2,1,0,2	1,1,1,1,1,1,1,0,2	2,1,1,1,1,2,2,1,1	1,1,1,1,1,2,1,1,1	0.6,0.45,0.5,0.75,0.6,0.65,0.55,0.3,0.7
>hsa-miR-133a-5p	AGCUGGUAAAAUGGAACCAAAU	UAAACCAAGGUAAAAUGGUCGA	9	6,6,6,6,6,6,6,6,6	4mer,5mer,4mer,3mer,3mer,4mer,4mer,3mer,3mer	551,655,670,824,1191,1298,1375,1423,1632	A,C,G,A,A,G,G,C,C	2,1,2,1,1,2,2,0,1	1,1,1,0,1,1,1,0,1	2,1,2,3,1,0,0,1,3	1,1,1,1,1,0,0,1,3	0.6,0.55,0.4,0.55,0.5,0.4,0.45,0.55,0.6
>hsa-miR-190a-5p	UGAUAUGUUUGAUAUAUUAGGU	UGGAUUAUAUAGUUUGUAUAGU	9	6,6,6,6,6,6,6,6,6	3mer,3mer,3mer,5mer,4mer,4mer,3mer,3mer,3mer	182,228,380,436,437,597,616,898,1655	A,C,C,U,A,U,U,C,G	2,2,1,3,1,1,2,3,2	0,2,0,1,0,0,0,1,1	2,2,2,2,2,1,2,1,2	1,1,1,2,1,1,1,0,1	0.65,0.45,0.5,0.8,0.8,0.45,0.4,0.45,0.45
>hsa-miR-1-5p	ACAUACUUCUUUAUAUGCCCAU	UACCCGUAUAUUUCUUCAUACA	9	6,6,6,6,6,6,6,6,6	3mer,4mer,5mer,3mer,3mer,3mer,3mer,3mer,3mer	319,692,755,827,1054,1291,1302,1572,1672	U,A,U,U,A,A,G,U,C	2,2,1,2,3,1,2,2,3	1,1,1,1,3,1,1,1,1	1,2,3,2,1,2,1,3,2	1,1,2,1,1,1,0,2,1	0.6,0.5,0.55,0.65,0.55,0.55,0.3,0.6,0.6
>hsa-miR-29c-3p	UAGCACCAUUUGAAAUCGGUUA	AUUGGCUAAAGUUUACCACGAU	9	6,6,6,6,6,6,6,6,6	2mer,5mer,4mer,4mer,4mer,2mer,4mer,4mer,4mer	62,86,346,414,523,772,1141,1748,1751	C,C,A,U,C,A,G,G,G	2,2,1,3,3,1,3,3,3	1,0,1,2,1,0,1,3,1	2,2,2,1,1,2,2,1,1	1,2,1,1,1,1,1,1,1	0.5,0.55,0.75,0.8,0.65,0.6,0.55,0.6,0.7
>hsa-miR-379-5p	UGGUAGACUAUGGAACGUAGG	GGAUGCAAGGUAUCAGAUGGU	9	6,6,6,6,6,6,6,6,7	4mer,4mer,4mer,2mer,3mer,3mer,3mer,3mer,5mer	112,548,620,621,1222,1372,1464,1468,1758	A,A,C,A,A,A,U,A,A	2,1,1,3,2,2,3,3,2	2,1,1,2,1,1,3,1,0	1,3,2,1,1,1,2,2,2	1,1,1,1,1,1,1,2,1	0.55,0.5,0.45,0.5,0.55,0.45,0.55,0.65,0.5
>hsa-miR-328-3p	CUGGCCCUCUCUGCCCUUCCGU	UGCCUUCCCGUCUCUCCCGGUC	9	6,6,6,6,6,6,6,6,6	4mer,4mer,5mer,3mer,5mer,3mer,2mer,3mer,4mer	134,160,179,635,641,947,975,1360,1379	G,C,A,U,A,U,U,A,G	2,2,3,2,1,1,0,4,1	2,1,3,2,1,1,0,4,1	1,0,1,1,0,2,3,1,1	1,0,1,1,0,1,3,1,1	0.45,0.65,0.7,0.4,0.5,0.35,0.5,0.5,0.3
>hsa-miR-151a-3p	CUAGACUGAAGCUCCUUGAGG	GGAGUUCCUCGAAGUCAGAUC	9	6,6,6,6,6,6,6,6,6	3mer,4mer,4mer,4mer,3mer,6mer,4mer,3mer,5mer	329,434,545,788,1219,1635,1687,1713,1756	A,U,G,A,C,C,U,G,U	2,2,2,2,2,2,2,3,3	1,1,1,1,1,1,1,1,3	2,1,3,1,2,2,1,1,1	1,1,1,1,1,1,0,0,1	0.65,0.85,0.6,0.6,0.5,0.55,0.75,0.45,0.6
>hsa-miR-424-3p	CAAAACGUGAGGCGCUGCUAU	UAUCGUCGCGGAGUGCAAAAC	9	6,6,6,6,6,6,7,6,6	3mer,4mer,4mer,5mer,3mer,3mer,5mer,4mer,4mer	62,417,418,734,766,774,831,832,1091	C,U,C,C,G,G,U,U,C	2,1,2,1,1,3,1,0,1	2,0,1,1,0,2,1,0,0	1,1,3,1,1,1,2,3,2	0,1,1,1,0,1,1,1,2	0.5,0.65,0.7,0.5,0.65,0.55,0.6,0.65,0.45
>hsa-miR-425-5p	AAUGACACGAUCACUCCCGUUGA	AGUUGCCCUCACUAGCACAGUAA	9	6,6,6,6,6,6,6,6,6	4mer,4mer,3mer,3mer,5mer,5mer,2mer,3mer,3mer	89,348,636,774,932,976,1153,1578,1757	C,A,G,G,G,C,C,U,C	1,1,2,1,0,1,1,3,2	0,1,2,1,0,1,1,2,1	3,1,3,3,2,3,1,2,2	2,1,2,2,1,1,1,2,2	0.45,0.55,0.45,0.55,0.3,0.45,0.55,0.55,0.5
>hsa-miR-450a-5p	UUUUGCGAUGUGUUCCUAAUAU	UAUAAUCCUUGUGUAGCGUUUU	9	6,7,6,6,6,6,6,6,6	3mer,5mer,5mer,4mer,5mer,3mer,3mer,4mer,4mer	145,405,554,562,803,1015,1408,1471,1567	C,U,A,G,G,G,A,G,G	2,2,2,2,2,2,2,2,2	0,1,1,1,0,0,1,0,1	3,3,1,1,1,3,2,0,2	2,3,1,0,0,1,0,0,1	0.4,0.6,0.55,0.65,0.55,0.35,0.55,0.5,0.5
>hsa-miR-489-3p	GUGACAUCACAUAUACGGCAGC	CGACGGCAUAUACACUACAGUG	9	6,6,6,6,7,6,6,6,6	3mer,4mer,3mer,2mer,5mer,4mer,3mer,4mer,3mer	88,128,323,629,773,851,891,975,1152	U,G,G,G,U,A,G,U,U	2,1,3,0,2,2,1,2,1	2,0,2,0,1,1,0,1,0	2,1,2,1,1,2,0,2,3	1,1,2,1,1,1,0,1,1	0.55,0.4,0.7,0.4,0.6,0.65,0.4,0.5,0.55
>hsa-miR-574-3p	CACGCUCAUGCACACACCCACA	ACACCCACACACGUACUCGCAC	9	6,6,6,6,6,6,6,6,6	4mer,3mer,2mer,5mer,5mer,5mer,2mer,3mer,3mer	85,86,318,826,874,895,946,1504,1720	U,C,G,G,U,U,A,A,C	1,2,3,1,2,3,1,2,2	1,1,2,1,1,1,1,2,0	3,1,2,2,1,3,3,1,1	2,1,1,1,1,3,3,1,1	0.5,0.55,0.6,0.6,0.4,0.4,0.35,0.6,0.4
>hsa-miR-652-5p	CAACCCUAGGAGAGGGUGCCAUUCA	ACUUACCGUGGGAGAGGAUCCCAAC	9	6,6,6,6,6,6,6,6,6	4mer,5mer,3mer,5mer,3mer,5mer,4mer,4mer,5mer	79,140,346,411,732,914,952,1003,1358	G,G,A,G,U,G,G,A,C	2,1,4,1,1,1,2,1,1	1,1,2,1,1,0,2,0,1	3,1,1,2,2,2,2,1,0	1,1,0,1,1,1,1,1,0	0.45,0.5,0.75,0.7,0.55,0.35,0.25,0.45,0.55
>hsa-miR-542-3p	UGUGACAGAUUGAUAACUGAAA	AAAGUCAAUAGUUAGACAGUGU	9	6,6,6,6,6,6,6,6,6	3mer,4mer,4mer,3mer,3mer,4mer,3mer,4mer,4mer	89,110,296,463,957,976,1062,1522,1757	C,C,U,A,U,C,U,A,C	3,2,1,2,2,1,2,2,2	1,1,1,1,1,0,1,1,1	2,0,1,1,1,2,1,1,1	1,0,1,1,1,1,0,1,1	0.45,0.5,0.45,0.55,0.35,0.45,0.5,0.5,0.5
>hsa-miR-3117-3p	AUAGGACUCAUAUAGUGCCAG	GACCGUGAUAUACUCAGGAUA	9	6,6,6,6,6,6,6,6,6	2mer,2mer,4mer,5mer,5mer,2mer,2mer,4mer,3mer	330,375,434,524,525,538,768,947,1093	A,U,U,A,U,C,U,U,G	1,2,1,2,3,2,1,1,1	1,1,1,1,3,2,1,0,1	3,1,3,3,1,3,3,3,3	1,1,1,2,1,1,2,1,1	0.6,0.5,0.85,0.65,0.6,0.5,0.65,0.35,0.5
>hsa-miR-3065-3p	UCAGCACCAGGAUAUUGUUGGAG	GAGGUUGUUAUAGGACCACGACU	9	6,6,6,6,6,6,6,6,6	2mer,4mer,2mer,4mer,5mer,3mer,3mer,5mer,5mer	141,347,459,931,1142,1302,1303,1749,1752	G,A,C,G,A,G,G,C,U	1,3,1,2,1,1,2,1,2	1,1,1,1,1,1,2,1,1	2,2,2,2,1,4,3,1,3	1,2,1,0,1,2,2,1,2	0.55,0.65,0.6,0.3,0.6,0.3,0.35,0.7,0.8
>hsa-miR-24-1-5p	UGCCUACUGAGCUGAUAUCAGU	UGACUAUAGUCGAGUCAUCCGU	8	6,6,6,6,6,6,6,6	3mer,2mer,3mer,3mer,4mer,3mer,4mer,4mer	301,921,944,1330,1382,1447,1645,1669	A,U,C,G,A,A,A,A	2,3,2,0,1,2,1,0	2,1,1,0,1,1,1,0	2,3,1,3,1,3,3,3	2,1,0,2,1,1,2,2	0.5,0.4,0.4,0.5,0.4,0.6,0.65,0.6
>hsa-miR-24-2-5p	UGCCUACUGAGCUGAAACACAG	GACACAAAGUCGAGUCAUCCGU	8	6,6,6,6,6,6,6,6	3mer,2mer,3mer,3mer,4mer,3mer,4mer,4mer	301,921,944,1330,1382,1447,1645,1669	A,U,C,G,A,A,A,A	2,3,2,0,1,2,1,0	2,1,1,0,1,1,1,0	2,2,1,2,1,2,2,3	2,0,0,2,1,1,2,2	0.5,0.4,0.4,0.5,0.4,0.6,0.65,0.6
>hsa-miR-26a-5p	UUCAAGUAAUCCAGGAUAGGCU	UCGGAUAGGACCUAAUGAACUU	8	6,6,6,6,6,6,7,6	5mer,3mer,3mer,3mer,2mer,2mer,4mer,3mer	309,600,681,693,840,1582,1692,1693	C,G,C,A,A,A,A,A	2,1,2,1,1,2,0,1	2,0,1,1,1,1,0,1	2,2,2,1,3,1,2,1	0,1,1,1,1,1,1,0	0.55,0.3,0.55,0.5,0.65,0.4,0.6,0.6
>hsa-miR-26b-5p	UUCAAGUAAUUCAGGAUAGGU	UGGAUAGGACUUAAUGAACUU	8	6,6,6,6,6,6,7,6	5mer,3mer,3mer,3mer,2mer,2mer,4mer,3mer	309,600,681,693,840,1582,1692,1693	C,G,C,A,A,A,A,A	2,1,3,2,1,2,1,1	1,0,3,1,1,1,1,1	2,2,2,1,3,1,2,1	0,1,1,1,1,1,1,0	0.55,0.3,0.55,0.5,0.65,0.4,0.6,0.6
>hsa-miR-30a-5p	UGUAAACAUCCUCGACUGGAAG	GAAGGUCAGCUCCUACAAAUGU	8	6,6,6,6,6,6,6,6	3mer,4mer,4mer,5mer,4mer,2mer,3mer,3mer	66,439,800,832,836,954,1153,1757	U,G,A,U,U,C,C,C	1,2,2,3,1,1,2,1	1,1,1,2,1,1,1,1	2,2,1,2,1,2,3,3	1,2,1,1,1,1,1,1	0.6,0.7,0.6,0.65,0.6,0.3,0.55,0.5
>hsa-miR-95-3p	UUCAACGGGUAUUUAUUGAGCA	ACGAGUUAUUUAUGGGCAACUU	8	6,7,6,6,6,6,6,6	4mer,7mer,5mer,3mer,3mer,3mer,3mer,3mer	61,75,76,341,870,1143,1272,1482	U,G,G,G,G,A,G,G	3,2,2,3,3,2,3,3	1,0,1,1,1,0,1,1	3,1,2,3,2,1,1,2	2,1,1,1,0,1,0,2	0.55,0.5,0.5,0.7,0.5,0.55,0.6,0.45
>hsa-miR-30c-5p	UGUAAACAUCCUACACUCUCAGC	CGACUCUCACAUCCUACAAAUGU	8	6,6,6,6,6,6,6,6	3mer,4mer,4mer,5mer,4mer,2mer,3mer,3mer	66,439,800,832,836,954,1153,1757	U,G,A,U,U,C,C,C	1,2,2,3,1,1,2,1	1,1,1,2,1,1,1,1	1,1,1,0,1,2,1,1	1,1,1,0,1,1,1,1	0.6,0.7,0.6,0.65,0.6,0.3,0.55,0.5
>hsa-miR-30d-5p	UGUAAACAUCCCCGACUGGAAG	GAAGGUCAGCCCCUACAAAUGU	8	6,6,6,6,6,6,6,6	3mer,4mer,4mer,5mer,4mer,2mer,3mer,3mer	66,439,800,832,836,954,1153,1757	U,G,A,U,U,C,C,C	1,2,2,2,1,1,1,1	1,1,1,1,1,1,1,1	2,2,1,2,1,2,3,3	1,2,1,1,1,1,1,1	0.6,0.7,0.6,0.65,0.6,0.3,0.55,0.5
>hsa-miR-30b-5p	UGUAAACAUCCUACACUCAGCU	UCGACUCACAUCCUACAAAUGU	8	6,6,6,6,6,6,6,6	3mer,4mer,4mer,5mer,4mer,2mer,3mer,3mer	66,439,800,832,836,954,1153,1757	U,G,A,U,U,C,C,C	1,2,2,3,1,1,2,1	1,1,1,2,1,1,1,1	1,1,1,0,1,2,1,1	1,1,1,0,1,1,1,1	0.6,0.7,0.6,0.65,0.6,0.3,0.55,0.5
>hsa-miR-140-3p	UACCACAGGGUAGAACCACGG	GGCACCAAGAUGGGACACCAU	8	6,6,6,6,6,6,7,6	4mer,3mer,4mer,5mer,3mer,4mer,7mer,3mer	61,78,520,919,920,951,973,1002	U,U,C,U,C,U,C,G	3,2,2,2,2,2,3,1	1,1,2,1,0,1,0,1	1,2,1,1,2,1,2,0	1,1,1,1,1,0,1,0	0.55,0.45,0.55,0.4,0.4,0.3,0.45,0.35
>hsa-miR-193a-3p	AACUGGCCUACAAAGUCCCAGU	UGACCCUGAAACAUCCGGUCAA	8	6,6,6,6,6,6,6,6	3mer,3mer,5mer,2mer,6mer,3mer,6mer,3mer	249,250,325,1030,1210,1274,1298,1704	U,G,U,C,G,C,G,U	1,1,2,1,1,2,3,1	1,0,2,1,1,2,1,1	2,3,3,3,1,3,1,1	1,3,1,1,0,3,1,0	0.35,0.3,0.7,0.4,0.55,0.55,0.4,0.6
>hsa-miR-30e-5p	UGUAAACAUCCUUGACUGGAAG	GAAGGUCAGUUCCUACAAAUGU	8	6,6,6,6,6,6,6,6	3mer,4mer,4mer,5mer,4mer,2mer,3mer,3mer	66,439,800,832,836,954,1153,1757	U,G,A,U,U,C,C,C	1,2,2,3,1,1,2,1	1,1,1,2,1,1,1,1	2,3,2,2,2,2,3,3	1,2,1,0,2,1,1,1	0.6,0.7,0.6,0.65,0.6,0.3,0.55,0.5
>hsa-miR-374a-5p	UUAUAAUACAACCUGAUAAGUG	GUGAAUAGUCCAACAUAAUAUU	8	6,6,6,6,6,6,6,6	3mer,4mer,3mer,4mer,4mer,5mer,4mer,3mer	191,317,349,440,776,840,1344,1682	A,U,G,A,C,A,G,C	2,1,2,1,1,2,1,1	1,1,1,1,1,2,1,1	2,1,1,3,1,2,1,2	1,0,1,2,0,0,0,2	0.55,0.55,0.45,0.75,0.6,0.65,0.35,0.6
>hsa-miR-425-3p	AUCGGGAAUGUCGUGUCCGCCC	CCCGCCUGUGCUGUAAGGGCUA	8	6,6,6,6,6,6,6,6	4mer,4mer,3mer,2mer,4mer,6mer,5mer,4mer	233,244,497,738,902,1134,1135,1710	G,U,A,U,G,G,G,C	2,2,2,2,2,3,1,2	1,1,1,2,1,1,0,1	2,2,3,2,3,2,1,3	1,1,2,1,0,1,1,1	0.45,0.3,0.5,0.45,0.45,0.35,0.4,0.45
>hsa-miR-494-3p	UGAAACAUACACGGGAAACCUC	CUCCAAAGGGCACAUACAAAGU	8	6,6,6,6,6,6,7,6	4mer,3mer,3mer,5mer,5mer,5mer,6mer,3mer	62,321,417,460,766,774,831,832	C,C,U,C,G,G,U,U	1,1,3,0,2,1,2,1	1,1,2,0,1,1,1,1	1,2,1,1,3,2,2,2	0,1,0,1,1,0,1,1	0.5,0.65,0.65,0.55,0.65,0.55,0.6,0.65
>hsa-miR-193b-3p	AACUGGCCCUCAAAGUCCCGCU	UCGCCCUGAAACUCCCGGUCAA	8	6,6,6,6,6,6,6,6	3mer,3mer,5mer,2mer,6mer,3mer,6mer,3mer	249,250,325,1030,1210,1274,1298,1704	U,G,U,C,G,C,G,U	0,2,2,1,1,1,3,1	0,2,1,1,1,1,2,1	2,3,3,3,1,3,1,1	1,3,1,1,0,3,1,0	0.35,0.3,0.7,0.4,0.55,0.55,0.4,0.6
>hsa-miR-500a-3p	AUGCACCUGGGCAAGGAUUCUG	GUCUUAGGAACGGGUCCACGUA	8	6,6,6,6,6,6,6,6	4mer,4mer,4mer,4mer,4mer,3mer,3mer,2mer	347,629,891,931,938,1010,1360,1734	A,G,G,G,C,G,A,C	2,2,2,2,3,2,0,3	0,2,1,1,1,1,0,1	1,3,3,1,1,2,0,3	0,1,3,1,1,0,0,1	0.65,0.4,0.4,0.3,0.35,0.4,0.5,0.55
>hsa-miR-455-3p	GCAGUCCAUGGGCAUAUACAC	CACAUAUACGGGUACCUGACG	8	6,6,6,6,6,6,6,6	4mer,4mer,6mer,4mer,3mer,3mer,5mer,4mer	52,762,821,910,1003,1139,1541,1718	A,U,A,G,A,C,G,A	3,2,3,3,0,3,2,0	1,0,1,1,0,2,2,0	1,2,1,1,2,1,1,1	1,1,1,1,1,1,1,1	0.75,0.6,0.55,0.5,0.45,0.5,0.4,0.45
>hsa-miR-582-5p	UUACAGUUGUUCAACCAGUUACU	UCAUUGACCAACUUGUUGACAUU	8	6,6,6,6,6,6,6,7	3mer,2mer,5mer,4mer,4mer,2mer,4mer,5mer	108,403,610,699,962,1658,1715,1734	U,A,C,C,G,A,G,C	2,2,3,1,2,1,0,1	2,1,1,1,1,1,0,1	1,0,1,1,2,1,2,1	1,0,1,1,1,1,1,1	0.45,0.55,0.55,0.55,0.45,0.45,0.4,0.55
>hsa-miR-624-5p	UAGUACCAGUACCUUGUGUUCA	ACUUGUGUUCCAUGACCAUGAU	8	6,6,6,6,6,6,6,6	2mer,2mer,4mer,3mer,2mer,2mer,2mer,2mer	86,414,523,864,1141,1579,1748,1751	C,U,C,C,G,U,G,G	2,1,2,2,1,1,1,2	1,1,1,1,0,1,1,1	2,2,2,3,1,3,1,2	0,0,2,1,0,2,1,2	0.55,0.8,0.65,0.45,0.55,0.5,0.6,0.7
>hsa-miR-374b-5p	AUAUAAUACAACCUGCUAAGUG	GUGAAUCGUCCAACAUAAUAUA	8	6,6,6,6,6,6,6,6	3mer,4mer,3mer,4mer,4mer,5mer,4mer,3mer	191,317,349,440,776,840,1344,1682	A,U,G,A,C,A,G,C	2,1,2,1,1,2,1,1	1,1,1,1,1,2,1,1	2,1,1,3,2,2,2,3	1,0,1,2,1,0,1,3	0.55,0.55,0.45,0.75,0.6,0.65,0.35,0.6
>hsa-miR-1306-5p	CCACCUCCCCUGCAAACGUCCA	ACCUGCAAACGUCCCCUCCACC	8	6,6,6,6,6,6,6,6	4mer,2mer,4mer,4mer,3mer,4mer,4mer,3mer	80,141,503,888,890,1003,1139,1327	A,G,A,U,A,A,C,G	2,1,3,3,2,2,1,1	1,1,2,2,1,2,0,1	2,1,1,2,0,1,1,2	2,1,1,2,0,1,1,2	0.5,0.55,0.6,0.5,0.5,0.45,0.5,0.4
>hsa-miR-103b	UCAUAGCCCUGUACAAUGCUGCU	UCGUCGUAACAUGUCCCGAUACU	8	6,6,6,6,6,6,6,6	4mer,5mer,4mer,2mer,5mer,3mer,3mer,3mer	377,692,775,890,949,1142,1562,1752	A,A,A,A,G,A,C,U	3,2,2,2,3,3,2,2	2,1,0,0,1,2,2,1	2,2,3,1,0,1,1,0	2,2,2,1,0,1,1,0	0.55,0.5,0.65,0.5,0.35,0.6,0.55,0.8
>hsa-miR-28-3p	CACUAGAUUGUGAGCUCCUGGA	AGGUCCUCGAGUGUUAGAUCAC	7	6,6,6,6,6,6,6	4mer,3mer,6mer,4mer,4mer,3mer,4mer	59,325,547,759,1221,1270,1480	G,U,C,A,C,G,G	3,2,4,1,3,2,2	1,0,2,1,3,0,1	1,2,4,1,1,1,2	0,1,3,0,1,1,1	0.6,0.7,0.55,0.55,0.5,0.6,0.35
>hsa-miR-99a-5p	AACCCGUAGAUCCGAUCUUGUG	GUGUUCUAGCCUAGAUGCCCAA	7	6,6,6,6,6,6,6	4mer,4mer,3mer,4mer,3mer,5mer,2mer	343,410,411,913,914,934,952	G,U,G,U,G,G,G	3,1,1,2,1,3,3	2,0,1,1,0,1,1	1,1,2,2,3,2,3	0,1,1,2,2,1,1	0.65,0.7,0.7,0.4,0.35,0.25,0.25
>hsa-miR-100-5p	AACCCGUAGAUCCGAACUUGUG	GUGUUCAAGCCUAGAUGCCCAA	7	6,6,6,6,6,6,6	4mer,4mer,3mer,4mer,3mer,5mer,2mer	343,410,411,913,914,934,952	G,U,G,U,G,G,G	3,1,1,2,1,3,3	2,0,1,1,0,1,1	0,0,1,2,3,2,2	0,0,0,2,2,1,1	0.65,0.7,0.7,0.4,0.35,0.25,0.25
>hsa-miR-139-5p	UCUACAGUGCACGUGUCUCCAGU	UGACCUCUGUGCACGUGACAUCU	7	6,6,6,6,6,6,6	4mer,3mer,3mer,3mer,4mer,4mer,5mer	368,546,815,963,972,1716,1735	A,U,G,C,U,U,C	2,2,2,1,2,0,1	1,1,1,1,1,0,1	2,3,2,2,3,2,2	1,1,1,0,0,0,1	0.55,0.6,0.45,0.5,0.5,0.45,0.65
>hsa-miR-34a-3p	CAAUCAGCAAGUAUACUGCCCU	UCCCGUCAUAUGAACGACUAAC	7	6,6,6,6,6,6,6	3mer,5mer,2mer,5mer,4mer,3mer,6mer	83,254,415,771,965,966,1562	G,C,U,U,U,C,C	1,2,2,3,2,3,2	0,0,1,2,1,3,1	2,1,2,2,2,2,2	1,1,1,1,1,1,2	0.5,0.3,0.75,0.6,0.45,0.45,0.55
>hsa-miR-221-3p	AGCUACAUUGUCUGCUGGGUUUC	CUUUGGGUCGUCUGUUACAUCGA	7	6,6,6,6,6,6,6	4mer,3mer,3mer,2mer,3mer,3mer,3mer	460,795,893,964,974,1259,1348	C,U,A,U,A,U,A	3,2,2,1,1,2,2	2,1,0,1,0,0,1	1,1,2,3,2,2,2	0,0,1,0,0,2,1	0.55,0.6,0.4,0.45,0.5,0.5,0.55
>hsa-miR-222-3p	AGCUACAUCUGGCUACUGGGU	UGGGUCAUCGGUCUACAUCGA	7	6,6,6,6,6,6,6	4mer,3mer,3mer,2mer,3mer,3mer,3mer	460,795,893,964,974,1259,1348	C,U,A,U,A,U,A	3,2,3,3,2,2,1	3,1,1,3,1,2,1	2,2,3,3,3,1,2	2,2,1,2,1,1,1	0.55,0.6,0.4,0.45,0.5,0.5,0.55
>hsa-miR-144-3p	UACAGUAUAGAUGAUGUACU	UCAUGUAGUAGAUAUGACAU	7	6,6,6,6,6,6,6	2mer,3mer,3mer,5mer,3mer,3mer,4mer	795,1560,1561,1686,1750,1751,1753	U,U,G,A,U,G,C	2,2,1,3,2,2,2	1,1,1,1,1,2,0	2,2,3,1,2,1,2	1,1,1,0,2,1,1	0.6,0.45,0.5,0.75,0.7,0.7,0.75
>hsa-miR-191-5p	CAACGGAAUCCCAAAAGCAGCUG	GUCGACGAAAACCCUAAGGCAAC	7	6,6,6,7,6,6,6	3mer,3mer,2mer,7mer,3mer,3mer,3mer	59,67,68,73,326,769,971	G,U,C,G,C,G,G	1,2,1,1,2,1,2	0,1,1,1,1,0,2	2,2,2,3,2,1,1	2,1,1,2,2,1,1	0.6,0.5,0.5,0.5,0.6,0.55,0.4
>hsa-miR-125b-2-3p	UCACAAGUCAGGCUCUUGGGAC	CAGGGUUCUCGGACUGAACACU	7	6,6,6,6,6,6,6	3mer,3mer,2mer,5mer,3mer,4mer,4mer	317,377,440,917,969,971,1344	U,A,A,G,U,G,G	1,1,2,2,3,1,1	0,1,1,2,3,0,1	1,2,2,3,1,1,3	1,1,2,1,1,0,1	0.55,0.55,0.75,0.4,0.4,0.4,0.35
>hsa-miR-127-3p	UCGGAUCCGUCUGAGCUUGGCU	UCGGUUCGAGUCUGCCUAGGCU	7	6,6,6,6,6,6,6	4mer,2mer,3mer,2mer,2mer,3mer,3mer	57,680,757,866,924,1478,1749	U,A,G,G,G,C,C	3,2,2,2,1,1,3	2,2,1,2,1,1,1	3,1,2,0,2,3,1	1,1,1,0,1,2,1	0.65,0.6,0.55,0.5,0.4,0.35,0.7
>hsa-miR-194-5p	UGUAACAGCAACUCCAUGUGGA	AGGUGUACCUCAACGACAAUGU	7	6,6,6,6,6,6,6	4mer,4mer,5mer,3mer,3mer,3mer,3mer	460,461,774,954,1153,1563,1757	C,A,G,C,C,A,C	1,0,3,1,0,2,1	1,0,2,1,0,2,1	1,2,1,4,2,1,2	0,2,1,3,1,1,1	0.55,0.6,0.55,0.3,0.55,0.6,0.5
>hsa-miR-29c-5p	UGACCGAUUUCUCCUGGUGUUC	CUUGUGGUCCUCUUUAGCCAGU	7	6,6,6,6,6,6,6	3mer,2mer,3mer,3mer,4mer,4mer,4mer	59,301,411,914,921,974,1544	G,A,G,G,U,A,G	2,2,3,3,2,0,3	1,2,2,1,1,0,2	3,1,1,2,2,3,3	2,1,1,1,1,2,3	0.6,0.5,0.7,0.35,0.4,0.5,0.35
>hsa-miR-99b-5p	CACCCGUAGAACCGACCUUGCG	GCGUUCCAGCCAAGAUGCCCAC	7	6,6,6,6,6,6,6	4mer,4mer,3mer,4mer,3mer,5mer,2mer	343,410,411,913,914,934,952	G,U,G,U,G,G,G	2,1,1,2,1,2,2	1,1,1,2,1,1,1	1,0,1,2,3,2,3	1,0,0,2,2,1,1	0.65,0.7,0.7,0.4,0.35,0.25,0.25
>hsa-miR-340-5p	UUAUAAAGCAAUGAGACUGAUU	UUAGUCAGAGUAACGAAAUAUU	7	6,6,6,6,6,6,6	5mer,5mer,5mer,4mer,3mer,5mer,4mer	209,440,441,775,835,837,838	A,A,A,A,U,A,G	1,1,1,1,2,3,2	1,1,1,1,2,2,2	0,1,1,3,1,2,2	0,1,0,1,1,1,1	0.6,0.75,0.7,0.65,0.55,0.6,0.6
>hsa-miR-337-5p	GAACGGCUUCAUACAGGAGUU	UUGAGGACAUACUUCGGCAAG	7	6,6,6,6,6,6,6	3mer,2mer,3mer,3mer,3mer,3mer,2mer	59,297,458,829,1263,1734,1755	G,G,G,U,G,C,A	2,1,1,3,4,0,2	1,1,1,3,4,0,2	3,2,0,1,1,2,2	2,2,0,1,1,1,2	0.6,0.4,0.55,0.65,0.5,0.55,0.7
>hsa-miR-331-3p	GCCCCUGGGCCUAUCCUAGAA	AAGAUCCUAUCCGGGUCCCCG	7	6,6,6,6,6,6,6	6mer,5mer,3mer,6mer,5mer,6mer,5mer	138,626,906,1108,1289,1377,1378	U,A,A,A,U,G,A	3,1,1,1,2,0,2	3,1,1,1,1,0,2	2,2,3,2,1,2,2	2,2,2,1,0,1,2	0.55,0.55,0.55,0.65,0.5,0.4,0.35
>hsa-miR-486-5p	UCCUGUACUGAGCUGCCCCGAG	GAGCCCCGUCGAGUCAUGUCCU	7	6,6,6,6,6,6,6	5mer,5mer,3mer,6mer,5mer,4mer,3mer	130,136,212,569,1106,1375,1661	G,G,A,A,G,G,G	1,2,2,2,2,1,0	1,1,1,1,2,0,0	3,2,1,1,2,1,2	1,1,1,0,1,0,2	0.45,0.55,0.6,0.75,0.65,0.45,0.6
>hsa-miR-493-5p	UUGUACAUGGUAGGCUUUCAUU	UUACUUUCGGAUGGUACAUGUU	7	6,6,6,6,6,6,6	3mer,5mer,5mer,2mer,4mer,3mer,4mer	323,567,1438,1564,1576,1577,1737	G,G,A,A,A,U,A	3,1,1,3,1,1,2	2,1,1,1,1,0,1	2,2,1,2,2,0,2	1,1,0,2,2,0,1	0.7,0.7,0.55,0.5,0.6,0.6,0.5
>hsa-miR-501-3p	AAUGCACCCGGGCAAGGAUUCU	UCUUAGGAACGGGCCCACGUAA	7	6,6,6,6,6,6,6	6mer,5mer,3mer,2mer,4mer,4mer,3mer	475,476,636,754,887,1274,1578	U,C,G,C,G,C,U	0,1,1,2,4,2,0	0,1,1,2,2,1,0	1,0,0,2,3,2,0	1,0,0,2,3,1,0	0.45,0.45,0.45,0.6,0.5,0.55,0.55
>hsa-miR-502-3p	AAUGCACCUGGGCAAGGAUUCA	ACUUAGGAACGGGUCCACGUAA	7	6,6,6,6,6,6,6	6mer,5mer,3mer,2mer,4mer,4mer,3mer	475,476,636,754,887,1274,1578	U,C,G,C,G,C,U	0,2,2,2,4,2,0	0,2,2,2,2,1,0	1,0,0,2,3,2,0	1,0,0,2,3,1,0	0.45,0.45,0.45,0.6,0.5,0.55,0.55
>hsa-miR-625-3p	GACUAUAGAACUUUCCCCCUCA	ACUCCCCCUUUCAAGAUAUCAG	7	6,6,6,6,7,6,6	2mer,2mer,4mer,3mer,4mer,3mer,3mer	61,520,547,752,951,952,1717	U,C,C,A,U,G,G	2,1,0,1,2,2,0	1,1,0,1,1,1,0	4,2,2,2,1,2,1	4,1,2,1,1,1,1	0.55,0.55,0.55,0.6,0.3,0.25,0.45
>hsa-miR-655-3p	AUAAUACAUGGUUAACCUCUUU	UUUCUCCAAUUGGUACAUAAUA	7	6,6,6,6,6,6,6	3mer,3mer,2mer,4mer,3mer,5mer,3mer	298,347,348,757,773,838,1577	G,A,A,G,U,G,U	3,3,3,2,2,2,2	3,0,0,1,1,0,1	1,1,1,1,2,2,1	1,1,1,1,1,1,0	0.45,0.65,0.55,0.55,0.6,0.6,0.6
>hsa-miR-454-5p	ACCCUAUCAAUAUUGUCUCUGC	CGUCUCUGUUAUAACUAUCCCA	7	6,6,6,6,6,6,6	4mer,4mer,4mer,3mer,3mer,3mer,3mer	131,137,176,503,817,1001,1330	A,G,C,A,A,U,G	2,1,1,1,2,1,1	1,1,0,1,1,0,0	3,4,4,1,3,2,2	1,1,1,1,1,1,1	0.45,0.55,0.7,0.6,0.55,0.45,0.5
>hsa-miR-744-5p	UGCGGGGCUAGGGCUAACAGCA	ACGACAAUCGGGAUCGGGGCGU	7	6,6,6,6,6,6,6	3mer,5mer,2mer,3mer,2mer,3mer,2mer	591,593,960,1035,1128,1557,1730	G,U,U,A,U,U,U	3,1,3,2,2,1,2	1,1,1,1,1,1,1	4,2,2,1,2,2,2	4,0,2,1,2,1,1	0.6,0.5,0.5,0.45,0.5,0.5,0.6
>hsa-miR-3120-3p	CACAGCAAGUGUAGACAGGCA	ACGGACAGAUGUGAACGACAC	7	6,6,6,6,6,6,6	3mer,2mer,3mer,5mer,5mer,5mer,6mer	61,62,64,416,1561,1751,1753	U,C,G,U,G,G,C	3,2,1,2,1,3,1	1,1,1,0,1,1,0	1,2,1,0,2,0,1	1,1,1,0,1,0,1	0.55,0.5,0.5,0.65,0.5,0.7,0.75
>hsa-miR-208a-3p	AUAAGACGAGCAAAAAGCUUGU	UGUUCGAAAAACGAGCAGAAUA	6	6,6,6,6,6,6	3mer,5mer,2mer,6mer,5mer,4mer	298,422,736,1092,1093,1264	G,A,G,A,G,U	2,3,1,1,1,2	1,1,1,1,1,2	1,2,0,1,1,0	1,2,0,1,1,0	0.45,0.6,0.45,0.55,0.5,0.55
>hsa-miR-132-5p	ACCGUGGCUUUCGAUUGUUACU	UCAUUGUUAGCUUUCGGUGCCA	6	6,6,6,6,6,6	3mer,5mer,3mer,2mer,5mer,4mer	482,497,925,950,959,1376	C,A,G,U,C,U	2,3,3,3,2,1	1,2,1,0,1,1	2,3,4,2,2,2	1,3,1,1,1,0	0.6,0.5,0.35,0.35,0.45,0.5
>hsa-miR-200a-3p	UAACACUGUCUGGUAACGAUGU	UGUAGCAAUGGUCUGUCACAAU	6	6,6,6,6,7,6	5mer,5mer,5mer,4mer,7mer,3mer	319,320,346,458,1301,1550	U,C,A,G,G,C	1,2,1,2,2,3	1,2,1,2,2,1	1,3,2,1,2,2	1,2,1,1,1,2	0.6,0.6,0.75,0.55,0.3,0.4
>hsa-miR-302a-5p	ACUUAAACGUGGAUGUACUUGCU	UCGUUCAUGUAGGUGCAAAUUCA	6	6,6,6,6,6,6	3mer,2mer,4mer,3mer,2mer,3mer	77,82,211,350,892,1362	U,U,G,G,C,G	3,3,2,2,2,1	1,0,1,0,0,0	2,1,2,2,2,2	0,1,1,1,0,1	0.5,0.5,0.6,0.5,0.4,0.45
>hsa-miR-376c-5p	GGUGGAUAUUCCUUCUAUGUU	UUGUAUCUUCCUUAUAGGUGG	6	6,6,6,6,6,6	4mer,3mer,4mer,4mer,3mer,6mer	274,281,324,480,495,1157	C,U,U,G,G,G	2,1,2,2,2,2	2,1,1,1,2,2	0,1,1,3,3,3	0,1,1,2,1,2	0.45,0.5,0.7,0.5,0.5,0.7
>hsa-miR-369-3p	AAUAAUACAUGGUUGAUCUUU	UUUCUAGUUGGUACAUAAUAA	6	6,6,6,6,6,6	3mer,4mer,4mer,5mer,3mer,3mer	348,439,774,1153,1578,1757	A,G,G,C,U,C	3,1,2,1,2,3	0,0,1,1,2,1	2,4,2,2,2,2	2,4,0,1,1,1	0.55,0.7,0.55,0.55,0.55,0.5
>hsa-miR-337-3p	CUCCUAUAUGAUGCCUUUCUUC	CUUCUUUCCGUAGUAUAUCCUC	6	6,6,6,6,6,6	4mer,4mer,4mer,2mer,4mer,3mer	212,213,352,504,1007,1069	A,A,A,C,G,C	2,1,2,2,2,2	1,0,1,1,1,2	1,2,1,2,3,2	1,1,1,1,1,1	0.6,0.6,0.5,0.55,0.45,0.45
>hsa-miR-324-3p	CCCACUGCCCCAGGUGCUGCUGG	GGUCGUCGUGGACCCCGUCACCC	6	6,6,6,6,6,6	4mer,3mer,4mer,3mer,6mer,4mer	319,501,638,871,906,918	U,U,C,C,A,G	0,1,1,0,1,2	0,1,1,0,1,2	2,1,2,2,3,2	1,1,0,1,1,0	0.6,0.6,0.55,0.55,0.55,0.4
>hsa-miR-338-5p	AACAAUAUCCUGGUGCUGAGUG	GUGAGUCGUGGUCCUAUAACAA	6	6,6,6,6,6,6	4mer,3mer,3mer,2mer,2mer,2mer	61,62,460,766,774,831	U,C,C,G,G,U	2,1,2,3,2,2	0,1,1,1,1,2	2,3,2,3,3,2	1,1,1,1,0,1	0.55,0.5,0.55,0.65,0.55,0.6
>hsa-miR-499a-3p	AACAUCACAGCAAGUCUGUGCU	UCGUGUCUGAACGACACUACAA	6	6,6,6,6,6,6	3mer,4mer,6mer,5mer,3mer,5mer	345,520,771,772,889,1748	U,C,U,A,G,G	2,1,4,2,2,0	1,1,2,1,2,0	2,1,2,3,2,2	1,0,1,2,1,1	0.7,0.55,0.6,0.6,0.45,0.6
>hsa-miR-487b-3p	AAUCGUACAGGGUCAUCCACUU	UUCACCUACUGGGACAUGCUAA	6	6,6,6,6,6,6	3mer,3mer,3mer,3mer,3mer,2mer	54,379,529,1030,1561,1578	C,C,G,C,G,U	3,0,2,2,3,1	0,0,1,2,3,1	1,2,2,2,1,3	1,0,0,1,1,2	0.65,0.45,0.5,0.4,0.5,0.55
>hsa-miR-628-3p	UCUAGUAAGAGUGGCAGUCGA	AGCUGACGGUGAGAAUGAUCU	6	6,6,7,6,6,6	3mer,2mer,3mer,2mer,2mer,2mer	211,758,839,1209,1483,1660	G,A,A,U,C,G	3,1,3,2,3,1	1,0,1,0,2,1	2,2,2,1,0,1	1,1,0,1,0,1	0.6,0.55,0.65,0.6,0.5,0.5
>hsa-miR-675-3p	CUGUAUGCCCUCACCGCUCA	ACUCGCCACUCCCGUAUGUC	6	6,6,6,6,7,6	2mer,3mer,3mer,3mer,4mer,3mer	474,484,540,614,1674,1675	U,U,C,U,A,G	2,1,3,1,3,3	2,1,2,1,2,3	1,2,3,2,2,2	1,1,1,2,2,2	0.5,0.6,0.55,0.5,0.65,0.55
>hsa-miR-208b-3p	AUAAGACGAACAAAAGGUUUGU	UGUUUGGAAAACAAGCAGAAUA	6	6,6,6,6,6,6	3mer,5mer,2mer,6mer,5mer,4mer	298,422,736,1092,1093,1264	G,A,G,A,G,U	1,3,1,1,1,2	1,2,1,1,1,2	1,2,0,1,1,0	0,2,0,1,1,0	0.45,0.6,0.45,0.55,0.5,0.55
>hsa-miR-499b-3p	AACAUCACUGCAAGUCUUAACA	ACAAUUCUGAACGUCACUACAA	6	6,6,6,6,6,6	3mer,4mer,6mer,5mer,3mer,5mer	345,520,771,772,889,1748	U,C,U,A,G,G	1,2,3,2,3,1	0,1,2,1,2,1	2,1,2,3,2,2	1,0,1,2,1,1	0.7,0.55,0.6,0.6,0.45,0.6
>hsa-miR-101-3p	UACAGUACUGUGAUAACUGAA	AAGUCAAUAGUGUCAUGACAU	5	6,6,6,6,6	2mer,3mer,2mer,3mer,4mer	636,1561,1578,1751,1753	G,G,U,G,C	3,3,1,3,3	3,2,1,1,1	2,2,1,1,2	1,1,0,1,2	0.45,0.5,0.55,0.7,0.75
>hsa-miR-200b-3p	UAAUACUGCCUGGUAAUGAUGA	AGUAGUAAUGGUCCGUCAUAAU	5	6,6,6,6,7	3mer,3mer,2mer,5mer,4mer	297,320,458,756,1301	G,C,G,G,G	1,2,2,3,2	1,2,2,2,2	2,3,1,3,2	1,2,1,2,1	0.4,0.6,0.55,0.5,0.3
>hsa-miR-200c-3p	UAAUACUGCCGGGUAAUGAUGGA	AGGUAGUAAUGGGCCGUCAUAAU	5	6,6,6,6,7	3mer,3mer,2mer,5mer,4mer	297,320,458,756,1301	G,C,G,G,G	2,1,1,4,1	1,1,1,2,1	2,3,1,3,2	1,2,1,2,1	0.4,0.6,0.55,0.5,0.3
>hsa-miR-155-5p	UUAAUGCUAAUCGUGAUAGGGGUU	UUGGGGAUAGUGCUAAUCGUAAUU	5	6,6,6,7,6	4mer,5mer,4mer,6mer,6mer	298,314,487,876,897	G,G,A,C,C	0,2,1,3,2	0,2,1,1,1	3,2,3,2,2	2,2,2,1,1	0.45,0.45,0.55,0.35,0.35
>hsa-miR-296-5p	AGGGCCCCCCCUCAAUCCUGU	UGUCCUAACUCCCCCCCGGGA	5	6,6,6,6,6	4mer,4mer,3mer,5mer,3mer	238,820,923,946,1072	C,G,G,A,C	0,1,1,2,0	0,1,1,1,0	2,1,2,3,1	2,1,1,2,1	0.3,0.5,0.4,0.35,0.55
>hsa-miR-365a-3p	UAAUGCCCCUAAAAAUCCUUAU	UAUUCCUAAAAAUCCCCGUAAU	5	6,6,6,6,6	5mer,5mer,5mer,5mer,5mer	238,304,476,875,896	C,C,C,G,U	0,1,1,1,2	0,1,1,0,1	3,1,1,3,2	2,1,1,2,1	0.3,0.65,0.45,0.35,0.35
>hsa-miR-365b-3p	UAAUGCCCCUAAAAAUCCUUAU	UAUUCCUAAAAAUCCCCGUAAU	5	6,6,6,6,6	5mer,5mer,5mer,5mer,5mer	238,304,476,875,896	C,C,C,G,U	0,1,1,1,2	0,1,1,0,1	3,1,1,3,2	2,1,1,2,1	0.3,0.65,0.45,0.35,0.35
>hsa-miR-369-5p	AGAUCGACCGUGUUAUAUUCGC	CGCUUAUAUUGUGCCAGCUAGA	5	6,6,6,6,6	2mer,3mer,4mer,2mer,3mer	63,187,380,921,1758	U,G,C,U,A	2,2,2,2,3	1,2,1,0,1	2,3,3,2,3	1,1,1,1,2	0.55,0.55,0.5,0.4,0.5
>hsa-miR-339-3p	UGAGCGCCUCGACGACAGAGCCG	GCCGAGACAGCAGCUCCGCGAGU	5	6,6,6,6,6	4mer,3mer,3mer,2mer,2mer	87,239,524,1359,1551	A,C,A,A,C	2,2,2,2,1	0,1,1,2,1	2,2,1,1,2	1,1,1,1,1	0.55,0.3,0.65,0.6,0.4
>hsa-miR-483-5p	AAGACGGGAGGAAAGAAGGGAG	GAGGGAAGAAAGGAGGGCAGAA	5	6,6,6,6,6	2mer,4mer,3mer,4mer,4mer	34,1267,1465,1634,1755	A,G,G,C,A	1,2,3,0,3	1,2,2,0,2	2,1,2,1,1	1,0,1,1,0	0.8,0.5,0.55,0.55,0.7
>hsa-miR-652-3p	AAUGGCGCCACUAGGGUUGUG	GUGUUGGGAUCACCGCGGUAA	5	6,6,6,6,6	3mer,3mer,3mer,4mer,4mer	89,296,596,958,1210	C,U,C,G,G	2,1,1,1,2	1,1,1,1,1	1,3,2,3,0	1,1,1,2,0	0.45,0.45,0.4,0.4,0.55
>hsa-miR-887-3p	GUGAACGGGCGCCAUCCCGAGG	GGAGCCCUACCGCGGGCAAGUG	5	6,6,6,6,6	5mer,4mer,3mer,4mer,4mer	75,280,1223,1455,1614	G,C,A,U,A	3,1,2,1,0	2,1,1,1,0	1,1,2,1,1	1,1,1,0,0	0.5,0.45,0.6,0.55,0.7
>hsa-miR-19a-3p	UGUGCAAAUCUAUGCAAAACUGA	AGUCAAAACGUAUCUAAACGUGU	4	6,6,6,6	3mer,3mer,5mer,3mer	312,463,702,957	U,A,A,U	1,2,1,3	1,1,1,1	1,3,1,2	1,2,0,1	0.5,0.55,0.6,0.35
>hsa-miR-19b-3p	UGUGCAAAUCCAUGCAAAACUGA	AGUCAAAACGUACCUAAACGUGU	4	6,6,6,6	3mer,3mer,5mer,3mer	312,463,702,957	U,A,A,U	0,2,1,2	0,1,1,1	1,3,1,2	1,2,0,1	0.5,0.55,0.6,0.35
>hsa-let-7i-3p	CUGCGCAAGCUACUGCCUUGCU	UCGUUCCGUCAUCGAACGCGUC	4	6,6,6,6	3mer,4mer,3mer,2mer	302,703,1564,1577	A,G,A,U	1,2,3,2	0,1,2,2	1,3,1,3	1,1,1,2	0.55,0.6,0.5,0.6
>hsa-miR-126-3p	UCGUACCGUGAGUAAUAAUGCG	GCGUAAUAAUGAGUGCCAUGCU	4	6,6,6,6	4mer,3mer,3mer,3mer	871,931,938,1087	C,G,C,U	1,4,3,1	0,3,2,1	3,1,1,0	2,0,0,0	0.55,0.3,0.35,0.5
>hsa-miR-190a-3p	CUAUAUAUCAAACAUAUUCCU	UCCUUAUACAAACUAUAUAUC	4	6,6,6,6	4mer,3mer,5mer,5mer	438,440,1115,1117	U,A,A,C	1,1,1,1	1,1,1,1	1,2,1,2	1,1,1,1	0.75,0.75,0.4,0.35
>hsa-miR-362-3p	AACACACCUAUUCAAGGAUUCA	ACUUAGGAACUUAUCCACACAA	4	6,6,6,6	6mer,4mer,6mer,4mer	320,887,891,1274	C,G,G,C	2,2,4,2	2,1,1,1	2,3,3,2	1,3,2,1	0.6,0.5,0.4,0.55
>hsa-miR-381-3p	UAUACAAGGGCAAGCUCUCUGU	UGUCUCUCGAACGGGAACAUAU	4	6,6,6,6	2mer,3mer,3mer,5mer	318,836,970,1267	G,U,G,G	2,4,1,3	1,2,0,2	2,3,2,1	1,3,1,1	0.6,0.6,0.4,0.5
>hsa-miR-329-3p	AACACACCUGGUUAACCUCUUU	UUUCUCCAAUUGGUCCACACAA	4	6,6,6,6	6mer,4mer,6mer,4mer	320,887,891,1274	C,G,G,C	2,3,3,3	1,1,0,1	3,3,2,2	2,2,1,1	0.6,0.5,0.4,0.55
>hsa-miR-545-3p	UCAGCAAACAUUUAUUGUGUGC	CGUGUGUUAUUUACAAACGACU	4	6,6,6,6	2mer,3mer,3mer,5mer	60,880,1268,1481	U,G,G,A	2,2,2,2	2,1,1,1	2,4,2,1	1,1,1,1	0.6,0.35,0.5,0.45
>hsa-let-7a-3p	CUAUACAAUCUACUGUCUUUC	CUUUCUGUCAUCUAACAUAUC	3	6,6,6	3mer,4mer,3mer	775,1268,1577	A,G,U	2,1,3	2,0,2	2,2,3	0,1,2	0.65,0.5,0.6
>hsa-let-7b-3p	CUAUACAACCUACUGCCUUCCC	CCCUUCCGUCAUCCAACAUAUC	3	6,6,6	3mer,4mer,3mer	775,1268,1577	A,G,U	1,1,2	1,0,2	2,2,3	0,1,2	0.65,0.5,0.6
>hsa-let-7e-3p	CUAUACGGCCUCCUAGCUUUCC	CCUUUCGAUCCUCCGGCAUAUC	3	6,6,6	4mer,3mer,2mer	209,1418,1756	A,C,U	1,3,2	1,2,1	1,2,2	0,1,1	0.6,0.45,0.6
>hsa-let-7f-1-3p	CUAUACAAUCUAUUGCCUUCCC	CCCUUCCGUUAUCUAACAUAUC	3	6,6,6	3mer,4mer,3mer	775,1268,1577	A,G,U	2,1,3	2,0,2	2,3,3	0,2,1	0.65,0.5,0.6
>hsa-let-7f-2-3p	CUAUACAGUCUACUGUCUUUCC	CCUUUCUGUCAUCUGACAUAUC	3	6,6,6	3mer,3mer,4mer	775,1577,1756	A,U,U	2,3,2	2,2,0	2,3,2	0,2,1	0.65,0.6,0.6
>hsa-miR-21-3p	CAACACCAGUCGAUGGGCUGU	UGUCGGGUAGCUGACCACAAC	3	6,6,6	4mer,6mer,4mer	62,346,772	C,A,A	3,2,2	2,1,1	2,1,2	2,1,2	0.5,0.75,0.6
>hsa-miR-98-3p	CUAUACAACUUACUACUUUCCC	CCCUUUCAUCAUUCAACAUAUC	3	6,6,6	3mer,4mer,3mer	775,1268,1577	A,G,U	1,1,2	0,0,1	2,2,2	1,1,2	0.65,0.5,0.6
>hsa-miR-7-1-3p	CAACAAAUCACAGUCUGCCAUA	AUACCGUCUGACACUAAACAAC	3	6,6,6	4mer,5mer,3mer	59,62,833	G,C,U	2,2,1	2,1,1	1,3,1	0,1,0	0.6,0.5,0.65
>hsa-miR-3529-3p	AACAACAAAAUCACUAGUCUUCCA	ACCUUCUGAUCACUAAAACAACAA	3	6,6,6	6mer,5mer,5mer	61,62,64	U,C,G	2,3,1	1,3,1	2,2,2	1,1,1	0.55,0.5,0.5
>hsa-miR-495-3p	AAACAAACAUGGUGCACUUCUU	UUCUUCACGUGGUACAAACAAA	2	6,6	5mer,4mer	62,833	C,U	1,3	1,3	1,2	1,1	0.5,0.65
>hsa-miR-1307-5p	UCGACCGGACCUCGACCGGCU	UCGGCCAGCUCCAGGCCAGCU	2	7,6	5mer,4mer	1545,1546	G,A	2,1	1,1	1,2	1,1	0.4,0.4
>hsa-miR-3065-5p	UCAACAAAAUCACUGAUGCUGGA	AGGUCGUAGUCACUAAAACAACU	2	6,6	5mer,4mer	60,1268	U,G	1,1	0,1	2,2	1,1	0.6,0.5
